# Supplementary material for: Effective population size does not explain long-term variation in genome size and transposable element content in animals
Source: eLife. 2025 Jul 18;13:RP100574. doi: 10.7554/eLife.100574 (PMC12274066; doi:10.7554/eLife.100574)
Supplement: Table 2—source data 1. — These correspond to the original values provided to the input matrix of characters to run Coevol. [file elife-100574-table2-data1.xlsx]

## Sheet: Table2_Sourcedata1
Clade	Species	TaxId	Phylum	Class	Order	Family	Accession_assembly	Genome_size	BodyLength_cm	Source_BodyLength	BasalMetRate_mLO2hr_pantheria	AgeatFirstBirth_d_pantheria	PopulationDensity_nperkm2_pantheria	PopulationGrpSize_pantheria	MaxLongevity_y	Source_MaxLongevity	Mass_g	Source_mass	Metabolic_rate_w	Source_metabolic_rate	SexMaturity_d	Source_SexMaturity	DepthRangeShallow	DepthRangeDeep	DepthRange	Overall_repeat_bp	Overall_repeat_gsperc	Overall_TEs_recent_gsperc	Overall_TEs_recent_bp
Actinopteri	Acipenser_ruthenus	7906	Chordata	Actinopteri	Acipenseriformes	Acipenseridae	GCA_010645085.1	1819080000	125	FishBase	NA	NA	NA	NA	46.1	AnAge	8800	AnAge	NA	NA	1794.5	AnAge	1	NA	NA	NA	NA	NA	NA
Actinopteri	Alosa_alosa	278164	Chordata	Actinopteri	Clupeiformes	Clupeidae	GCA_017589495.1	1.04017e+09	69	FishBase	NA	NA	NA	NA	10	AnAge	2200	AnAge	NA	NA	1459.5	AnAge	10	300	290	271271996	26.26	18.8042	195595929
Actinopteri	Coilia_nasus	365059	Chordata	Actinopteri	Clupeiformes	Engraulidae	GCA_007927625.1	9.88808e+08	41	FishBase	NA	NA	NA	NA	NA	NA	NA	NA	NA	NA	NA	NA	0	50	50	287107128	29.27	18.4578	182511821
Actinopteri	Denticeps_clupeoides	299321	Chordata	Actinopteri	Clupeiformes	Denticipitidae	GCA_900700375.2	6.92591e+08	15	FishBase	NA	NA	NA	NA	NA	NA	NA	NA	NA	NA	NA	NA	NA	NA	NA	125074688	18.18	10.4362	72280269
Actinopteri	Ameiurus_melas	219545	Chordata	Actinopteri	Siluriformes	Ictaluridae	GCA_012411365.1	1075800000	66	FishBase	NA	NA	NA	NA	10	AnAge	1995.5	AnAge	NA	NA	730	AnAge	10	NA	NA	NA	NA	NA	NA
Actinopteri	Ictalurus_punctatus	7998	Chordata	Actinopteri	Siluriformes	Ictaluridae	GCA_001660625.2	1026900000	NA	NA	NA	NA	NA	NA	16	AnAge	13732.5	AnAge	NA	NA	NA	NA	NA	NA	NA	NA	NA	NA	NA
Actinopteri	Pangasianodon_hypophthalmus	310915	Chordata	Actinopteri	Siluriformes	Pangasiidae	GCA_009078355.1	9.24436e+08	130	FishBase	NA	NA	NA	NA	NA	NA	44000	FishBase	NA	NA	NA	NA	NA	NA	NA	NA	NA	NA	NA
Actinopteri	Silurus_meridionalis	175797	Chordata	Actinopteri	Siluriformes	Siluridae	GCA_014805685.1	9.04594e+08	114.2	FishBase	NA	NA	NA	NA	NA	NA	10800	FishBase	NA	NA	NA	NA	NA	NA	NA	249910208	27.82	11.0536	99990181
Actinopteri	Bagarius_yarrelli	175774	Chordata	Actinopteri	Siluriformes	Sisoridae	GCA_005784505.1	6.96692e+08	200	FishBase	NA	NA	NA	NA	NA	NA	NA	NA	NA	NA	NA	NA	NA	NA	NA	135388572	19.6	8.34574	58144119
Actinopteri	Beaufortia_kweichowensis	241442	Chordata	Actinopteri	Cypriniformes	Gastromyzontidae	GCA_019155185.1	5.48741e+08	8	FishBase	NA	NA	NA	NA	NA	NA	NA	NA	NA	NA	NA	NA	NA	NA	NA	99229884	18.21	12.8576	70554722
Actinopteri	Triplophysa_dalaica	1582913	Chordata	Actinopteri	Cypriniformes	Nemacheilidae	GCA_015846415.1	7.41616e+08	NA	NA	NA	NA	NA	NA	NA	NA	NA	NA	NA	NA	NA	NA	NA	NA	NA	224396044	30.46	15.7322	116672616
Actinopteri	Triplophysa_siluroides	422203	Chordata	Actinopteri	Cypriniformes	Nemacheilidae	GCA_006030095.1	1075800000	50	FishBase	NA	NA	NA	NA	NA	NA	1500	FishBase	NA	NA	NA	NA	NA	NA	NA	318956196	29.97	16.5941	178519570
Actinopteri	Myxocyprinus_asiaticus	70543	Chordata	Actinopteri	Cypriniformes	Catostomidae	GCA_019703515.1	2689500000	60	FishBase	NA	NA	NA	NA	NA	NA	NA	NA	NA	NA	NA	NA	NA	NA	NA	NA	NA	NA	NA
Actinopteri	Carassius_auratus	7957	Chordata	Actinopteri	Cypriniformes	Cyprinidae	GCA_003368295.1	2.20939e+09	48	FishBase	NA	NA	NA	NA	41	AnAge	NA	NA	NA	NA	NA	NA	0	20	20	NA	NA	NA	NA
Actinopteri	Oxygymnocypris_stewartii	361644	Chordata	Actinopteri	Cypriniformes	Cyprinidae	GCA_003573665.1	2.244e+09	67.6	FishBase	NA	NA	NA	NA	NA	NA	2968.1	FishBase	NA	NA	NA	NA	NA	NA	NA	NA	NA	NA	NA
Actinopteri	Danio_aesculapii	1142201	Chordata	Actinopteri	Cypriniformes	Danionidae	GCA_903798145.1	1.67788e+09	2.96	FishBase	NA	NA	NA	NA	NA	NA	NA	NA	NA	NA	NA	NA	NA	NA	NA	682634992	40.97	10.0359	168390875
Actinopteri	Danio_kyathit	242068	Chordata	Actinopteri	Cypriniformes	Danionidae	GCA_903798195.1	2.07361e+09	3.45	FishBase	NA	NA	NA	NA	NA	NA	NA	NA	NA	NA	NA	NA	NA	NA	NA	938985184	45.6	16.5519	343221249
Actinopteri	Danionella_dracula	623740	Chordata	Actinopteri	Cypriniformes	Danionidae	GCA_900490495.1	8.10949e+08	1.67	FishBase	NA	NA	NA	NA	NA	NA	NA	NA	NA	NA	NA	NA	NA	NA	NA	119709960	14.86	7.2649	58914669
Actinopteri	Chanos_chanos	29144	Chordata	Actinopteri	Gonorynchiformes	Chanidae	GCA_902362185.1	8.00928e+08	180	FishBase	NA	NA	NA	NA	15	AnAge	7700	AnAge	NA	NA	2326.5	AnAge	1	30	29	83969476	10.55	6.29495	50418007
Actinopteri	Amphilophus_citrinellus	61819	Chordata	Actinopteri	Cichliformes	Cichlidae	GCA_013435755.1	1.16923e+09	24.4	FishBase	NA	NA	NA	NA	NA	NA	NA	NA	NA	NA	NA	NA	NA	NA	NA	208314184	17.96	6.49897	75988128
Actinopteri	Astatotilapia_calliptera	8154	Chordata	Actinopteri	Cichliformes	Cichlidae	GCA_900246225.5	1.07146e+09	15	FishBase	NA	NA	NA	NA	NA	NA	NA	NA	NA	NA	NA	NA	NA	NA	NA	272080688	25.57	19.6447	210484077
Actinopteri	Simochromis_diagramma	43689	Chordata	Actinopteri	Cichliformes	Cichlidae	GCA_900408965.1	1.03319e+09	19.5	FishBase	NA	NA	NA	NA	NA	NA	NA	NA	NA	NA	NA	NA	NA	NA	NA	249318764	24.3	16.9732	175364884
Actinopteri	Oreochromis_aureus	47969	Chordata	Actinopteri	Cichliformes	Cichlidae	GCA_013358895.1	1183380000	45.7	FishBase	NA	NA	NA	NA	NA	NA	2010	FishBase	NA	NA	NA	NA	5	NA	NA	NA	NA	NA	NA
Actinopteri	Oreochromis_niloticus	8128	Chordata	Actinopteri	Cichliformes	Cichlidae	GCA_001858045.3	1.22303e+09	60	FishBase	NA	NA	NA	NA	9	AnAge	2400	AnAge	NA	NA	NA	NA	0	20	20	NA	NA	NA	NA
Actinopteri	Aphyosemion_australe	52653	Chordata	Actinopteri	Cyprinodontiformes	Nothobranchiidae	GCA_006937985.1	1.05682e+09	6	FishBase	NA	NA	NA	NA	NA	NA	NA	NA	NA	NA	NA	NA	NA	NA	NA	514444504	48.89	32.8301	346953301
Actinopteri	Callopanchax_toddi	60409	Chordata	Actinopteri	Cyprinodontiformes	Nothobranchiidae	GCA_006937965.1	1.03871e+09	8	FishBase	NA	NA	NA	NA	NA	NA	NA	NA	NA	NA	NA	NA	NA	NA	NA	403758888	39.03	26.6599	276917358
Actinopteri	Pachypanchax_playfairii	52664	Chordata	Actinopteri	Cyprinodontiformes	Aplocheilidae	GCA_006937955.1	713940000	10	FishBase	NA	NA	NA	NA	NA	NA	NA	NA	NA	NA	NA	NA	NA	NA	NA	212415680	29.88	19.4029	138524808
Actinopteri	Kryptolebias_marmoratus	37003	Chordata	Actinopteri	Cyprinodontiformes	Rivulidae	GCA_001649575.2	8.29645e+08	NA	NA	NA	NA	NA	NA	NA	NA	NA	NA	NA	NA	NA	NA	NA	NA	NA	189430108	23.08	12.3869	102766939
Actinopteri	Cyprinodon_tularosa	77115	Chordata	Actinopteri	Cyprinodontiformes	Cyprinodontidae	GCA_016077235.1	1.32131e+09	5	FishBase	NA	NA	NA	NA	5	AnAge	NA	NA	NA	NA	NA	NA	NA	NA	NA	515121628	39.26	22.6185	298861328
Actinopteri	Gambusia_affinis	33528	Chordata	Actinopteri	Cyprinodontiformes	Poeciliidae	GCA_019740435.1	919320000	5.1	FishBase	NA	NA	NA	NA	3	AnAge	NA	NA	NA	NA	90	AnAge	NA	NA	NA	179834016	19.7	12.6557	116346532
Actinopteri	Xiphophorus_couchianus	32473	Chordata	Actinopteri	Cyprinodontiformes	Poeciliidae	GCA_001444195.3	733500000	4	FishBase	NA	NA	NA	NA	NA	NA	NA	NA	NA	NA	NA	NA	NA	NA	NA	87450444	12.05	6.41427	47048638
Actinopteri	Xiphophorus_maculatus	8083	Chordata	Actinopteri	Cyprinodontiformes	Poeciliidae	GCA_002775205.2	968220000	4	FishBase	NA	NA	NA	NA	NA	NA	NA	NA	NA	NA	NA	NA	NA	NA	NA	NA	NA	NA	NA
Actinopteri	Xiphophorus_hellerii	8084	Chordata	Actinopteri	Cyprinodontiformes	Poeciliidae	GCA_003331165.2	978000000	14	FishBase	NA	NA	NA	NA	NA	NA	NA	NA	NA	NA	NA	NA	NA	NA	NA	200713708	20.66	11.863	116020066
Actinopteri	Poeciliopsis_occidentalis	68464	Chordata	Actinopteri	Cyprinodontiformes	Poeciliidae	GCA_010883035.1	665040000	6	FishBase	NA	NA	NA	NA	1	AnAge	NA	NA	NA	NA	NA	NA	NA	NA	NA	64144808	9.71	4.67011	31058099
Actinopteri	Micropoecilia_picta	69234	Chordata	Actinopteri	Cyprinodontiformes	Poeciliidae	GCA_905332405.1	8.98221e+08	3	FishBase	NA	NA	NA	NA	NA	NA	NA	NA	NA	NA	NA	NA	NA	NA	NA	NA	NA	NA	NA
Actinopteri	Poecilia_formosa	48698	Chordata	Actinopteri	Cyprinodontiformes	Poeciliidae	GCA_000485575.1	948660000	9.6	FishBase	NA	NA	NA	NA	NA	NA	NA	NA	NA	NA	NA	NA	NA	NA	NA	NA	NA	NA	NA
Actinopteri	Hirundichthys_speculiger	938393	Chordata	Actinopteri	Beloniformes	Exocoetidae	GCA_018398805.1	1.26826e+09	NA	NA	NA	NA	NA	NA	NA	NA	NA	NA	NA	NA	NA	NA	NA	NA	NA	433048288	34.45	18.1569	230276215
Actinopteri	Oryzias_celebensis	126373	Chordata	Actinopteri	Beloniformes	Adrianichthyidae	GCA_014656515.1	831300000	4.5	FishBase	NA	NA	NA	NA	NA	NA	NA	NA	NA	NA	NA	NA	NA	NA	NA	260224268	31.43	16.7765	139462907
Actinopteri	Oryzias_woworae	1221322	Chordata	Actinopteri	Beloniformes	Adrianichthyidae	GCA_016861445.1	8.52455e+08	2.8	FishBase	NA	NA	NA	NA	NA	NA	NA	NA	NA	NA	NA	NA	NA	NA	NA	NA	NA	NA	NA
Actinopteri	Oryzias_javanicus	123683	Chordata	Actinopteri	Beloniformes	Adrianichthyidae	GCA_003999625.1	850860000	4.5	FishBase	NA	NA	NA	NA	NA	NA	NA	NA	NA	NA	NA	NA	NA	NA	NA	171132800	20.25	9.40827	80051236
Actinopteri	Neostethus_bicornis	300306	Chordata	Actinopteri	Atheriniformes	Phallostethidae	GCA_902685375.1	9.47997e+08	3	FishBase	NA	NA	NA	NA	NA	NA	NA	NA	NA	NA	NA	NA	NA	NA	NA	231995712	24.64	12.9251	122529812
Actinopteri	Parambassis_ranga	210632	Chordata	Actinopteri	NA	Ambassidae	GCA_900634625.2	6.72756e+08	8.2	FishBase	NA	NA	NA	NA	NA	NA	NA	NA	NA	NA	NA	NA	NA	NA	NA	108985072	16.31	13.7274	92352103
Actinopteri	Amphiprion_percula	161767	Chordata	Actinopteri	NA	Pomacentridae	GCA_003047355.2	938880000	11	FishBase	NA	NA	NA	NA	NA	NA	NA	NA	NA	NA	NA	NA	1	15	14	NA	NA	NA	NA
Actinopteri	Gouania_willdenowi	441366	Chordata	Actinopteri	Blenniiformes	Gobiesocidae	GCA_900634775.2	1.14011e+09	NA	NA	NA	NA	NA	NA	NA	NA	NA	NA	NA	NA	NA	NA	NA	NA	NA	399428936	35.28	17.2728	196929280
Actinopteri	Salarias_fasciatus	181472	Chordata	Actinopteri	Blenniiformes	Blenniidae	GCA_902148845.1	811740000	14	FishBase	NA	NA	NA	NA	NA	NA	NA	NA	NA	NA	NA	NA	0	8	8	130797900	16.22	11.3483	92118592
Actinopteri	Anabas_testudineus	64144	Chordata	Actinopteri	Anabantiformes	Anabantidae	GCA_900324465.3	6.78358e+08	25	FishBase	NA	NA	NA	NA	8	AnAge	NA	NA	NA	NA	NA	NA	0	NA	NA	69362660	10.29	7.74281	52523939
Actinopteri	Betta_splendens	158456	Chordata	Actinopteri	Anabantiformes	Osphronemidae	GCA_900634795.3	616140000	6.5	FishBase	NA	NA	NA	NA	2	AnAge	NA	NA	NA	NA	NA	NA	NA	NA	NA	NA	NA	NA	NA
Actinopteri	Channa_argus	215402	Chordata	Actinopteri	Anabantiformes	Channidae	GCA_018997905.1	860640000	100	FishBase	NA	NA	NA	NA	NA	NA	8000	FishBase	NA	NA	NA	NA	NA	NA	NA	177368540	20.75	14.0976	121329239
Actinopteri	Channa_maculata	188791	Chordata	Actinopteri	Anabantiformes	Channidae	GCA_020496755.1	7.54808e+08	20	FishBase	NA	NA	NA	NA	NA	NA	NA	NA	NA	NA	NA	NA	NA	NA	NA	151639464	20.23	13.4967	101873995
Actinopteri	Mastacembelus_armatus	205130	Chordata	Actinopteri	Synbranchiformes	Mastacembelidae	GCA_900324485.3	7.22284e+08	90	FishBase	NA	NA	NA	NA	NA	NA	500	FishBase	NA	NA	NA	NA	NA	NA	NA	126878660	17.69	12.3157	88954394
Actinopteri	Brachirus_orientalis	435138	Chordata	Actinopteri	Pleuronectiformes	Soleidae	GCA_016785285.1	7.68282e+08	38	FishBase	NA	NA	NA	NA	NA	NA	NA	NA	NA	NA	NA	NA	15	20	5	164942780	21.61	15.5246	119272543
Actinopteri	Trinectes_maculatus	195658	Chordata	Actinopteri	Pleuronectiformes	Achiridae	GCA_016785345.1	5.50712e+08	20	FishBase	NA	NA	NA	NA	6	AnAge	NA	NA	NA	NA	NA	NA	0	75	75	95956500	17.54	17.6237	97055810
Actinopteri	Colistium_nudipinnis	1156758	Chordata	Actinopteri	Pleuronectiformes	Rhombosoleidae	GCA_016785305.1	5.23287e+08	90	FishBase	NA	NA	NA	NA	16	FishBase	1500	FishBase	NA	NA	NA	NA	NA	NA	NA	83779956	16.12	15.3368	80255647
Actinopteri	Pseudorhombus_dupliciocellatus	367197	Chordata	Actinopteri	Pleuronectiformes	Paralichthyidae	GCA_016785235.1	4.8402e+08	40	FishBase	NA	NA	NA	NA	NA	NA	NA	NA	NA	NA	NA	NA	50	150	100	78167420	16.26	16.6817	80742995
Actinopteri	Polydactylus_sextarius	435218	Chordata	Actinopteri	NA	Polynemidae	GCA_016801845.1	6.89208e+08	30	FishBase	NA	NA	NA	NA	NA	NA	NA	NA	NA	NA	NA	NA	16	73	57	71247640	10.41	6.70371	46202522
Actinopteri	Echeneis_naucrates	173247	Chordata	Actinopteri	Carangiformes	Echeneidae	GCA_900963305.2	665040000	110	FishBase	NA	NA	NA	NA	NA	NA	2300	FishBase	NA	NA	NA	NA	1	85	84	64485600	9.76	7.12338	47373349
Actinopteri	Seriola_lalandi_dorsalis	1841481	Chordata	Actinopteri	Carangiformes	Carangidae	GCA_002814215.1	8.92406e+08	250	FishBase	NA	NA	NA	NA	12	FishBase	96840	FishBase	NA	NA	NA	NA	3	825	822	88984520	10.07	4.34001	38730462
Actinopteri	Trachurus_trachurus	36212	Chordata	Actinopteri	Carangiformes	Carangidae	GCA_905171665.1	9.98495e+08	70	FishBase	NA	NA	NA	NA	NA	NA	2000	FishBase	NA	NA	NA	NA	0	1050	1050	179518392	18.1	12.3816	123629696
Actinopteri	Istiophorus_platypterus	13575	Chordata	Actinopteri	Istiophoriformes	Istiophoridae	GCA_016859345.1	7.49148e+08	NA	NA	NA	NA	NA	NA	13	AnAge	55110	AnAge	NA	NA	NA	NA	NA	NA	NA	67014020	9	5.6306	42181543
Actinopteri	Xiphias_gladius	8245	Chordata	Actinopteri	Istiophoriformes	Xiphiidae	GCA_016859285.1	645480000	455	FishBase	NA	NA	NA	NA	NA	NA	650000	FishBase	NA	NA	NA	NA	0	2878	2878	100622432	15.69	8.18068	52804671
Actinopteri	Lates_calcarifer	8187	Chordata	Actinopteri	NA	Centropomidae	GCA_001640805.1	684600000	NA	NA	NA	NA	NA	NA	NA	NA	NA	NA	NA	NA	NA	NA	NA	NA	NA	42349408	6.25	3.45063	23622994
Actinopteri	Toxotes_chatareus	270537	Chordata	Actinopteri	NA	Toxotidae	GCA_016801885.1	7.54695e+08	40	FishBase	NA	NA	NA	NA	NA	NA	750	FishBase	NA	NA	NA	NA	NA	NA	NA	108345088	14.45	9.57362	72251583
Actinopteri	Psettodes_erumei	195640	Chordata	Actinopteri	Pleuronectiformes	Psettodidae	GCA_016785225.1	694380000	64	FishBase	NA	NA	NA	NA	NA	NA	9000	FishBase	NA	NA	NA	NA	1	100	99	173031808	25.09	19.7757	137318494
Actinopteri	Cephalopholis_sonnerati	160708	Chordata	Actinopteri	Perciformes	Serranidae	GCA_019142605.1	1.26908e+09	57	FishBase	NA	NA	NA	NA	NA	NA	NA	NA	NA	NA	NA	NA	10	150	140	377296792	29.94	9.83744	124845417
Actinopteri	Epinephelus_coioides	94232	Chordata	Actinopteri	Perciformes	Serranidae	GCA_900536245.1	1.24467e+09	120	FishBase	NA	NA	NA	NA	22	AnAge	8250	AnAge	NA	NA	912	AnAge	1	100	99	NA	NA	NA	NA
Actinopteri	Epinephelus_lanceolatus	310571	Chordata	Actinopteri	Perciformes	Serranidae	GCA_005281545.1	1.32196e+09	270	FishBase	NA	NA	NA	NA	NA	NA	400000	FishBase	NA	NA	NA	NA	1	200	199	470393532	35.83	16.3373	215972517
Actinopteri	Plectropomus_leopardus	160734	Chordata	Actinopteri	Perciformes	Serranidae	GCA_008729295.2	1017120000	120	FishBase	NA	NA	NA	NA	26	AnAge	12980	AnAge	NA	NA	1186	AnAge	3	100	97	98308752	9.74	2.87034	29194817
Actinopteri	Cottoperca_gobio	56716	Chordata	Actinopteri	Perciformes	Bovichtidae	GCA_900634415.1	7.43393e+08	80	FishBase	NA	NA	NA	NA	NA	NA	NA	NA	NA	NA	NA	NA	NA	NA	NA	183905552	24.92	9.39786	69862978
Actinopteri	Dissostichus_mawsoni	36200	Chordata	Actinopteri	Perciformes	Nototheniidae	GCA_011823955.1	997560000	200	FishBase	NA	NA	NA	NA	31	AnAge	44000	AnAge	NA	NA	NA	NA	0	2200	2200	NA	NA	NA	NA
Actinopteri	Trematomus_bernacchii	40690	Chordata	Actinopteri	Perciformes	Nototheniidae	GCA_902827165.1	1163820000	28	FishBase	NA	NA	NA	NA	10	AnAge	NA	NA	NA	NA	1642	AnAge	0	700	700	331362220	28.67	23.2813	270951966
Actinopteri	Trematomus_loennbergii	40692	Chordata	Actinopteri	Perciformes	Nototheniidae	GCA_012861695.1	1.47096e+09	30	FishBase	NA	NA	NA	NA	NA	NA	NA	NA	NA	NA	NA	NA	0	1191	1191	615890276	42.16	33.8888	498490049
Actinopteri	Gymnodraco_acuticeps	8218	Chordata	Actinopteri	Perciformes	Bathydraconidae	GCA_902827175.1	1.21239e+09	NA	NA	NA	NA	NA	NA	NA	NA	NA	NA	NA	NA	NA	NA	NA	NA	NA	476979616	39.62	31.2874	379325674
Actinopteri	Pseudochaenichthys_georgianus	52239	Chordata	Actinopteri	Perciformes	Channichthyidae	GCA_902827115.1	1.24775e+09	60	FishBase	NA	NA	NA	NA	NA	NA	2080	FishBase	NA	NA	NA	NA	0	475	475	478611856	38.63	29.2348	364776628
Actinopteri	Harpagifer_antarcticus	43256	Chordata	Actinopteri	Perciformes	Harpagiferidae	GCA_902827135.1	1.14536e+09	NA	NA	NA	NA	NA	NA	9	AnAge	NA	NA	NA	NA	NA	NA	NA	NA	NA	411875016	36.22	28.0038	320743507
Actinopteri	Ophiodon_elongatus	225387	Chordata	Actinopteri	Perciformes	Hexagrammidae	GCA_016806645.1	7.8757e+08	152	FishBase	NA	NA	NA	NA	20	AnAge	32505	AnAge	NA	NA	NA	NA	0	475	475	121008960	15.47	9.08926	71584309
Actinopteri	Pseudoliparis_sp._Yap_Trench	2499240	Chordata	Actinopteri	Perciformes	Liparidae	GCA_004335475.1	1.02328e+09	NA	NA	NA	NA	NA	NA	NA	NA	NA	NA	NA	NA	NA	NA	NA	NA	NA	378825000	37.28	26.4015	270160617
Actinopteri	Pungitius_pungitius	134920	Chordata	Actinopteri	Perciformes	Gasterosteidae	GCA_902500615.3	5.70567e+08	9	FishBase	NA	NA	NA	NA	5	AnAge	NA	NA	NA	NA	547	AnAge	0	110	110	138976280	24.46	19.9469	113810186
Actinopteri	Sebastes_aleutianus	214485	Chordata	Actinopteri	Perciformes	Sebastidae	GCA_916700875.1	1.08245e+09	97	FishBase	NA	NA	NA	NA	205	AnAge	495	AnAge	NA	NA	NA	NA	25	900	875	350215956	32.58	12.114	131127364
Actinopteri	Sebastes_dallii	394690	Chordata	Actinopteri	Perciformes	Sebastidae	GCA_916700725.1	1.03363e+09	25	FishBase	NA	NA	NA	NA	12	AnAge	NA	NA	NA	NA	NA	NA	18	256	238	328815164	32.03	12.0343	124390325
Actinopteri	Sebastes_diaconus	2603974	Chordata	Actinopteri	Perciformes	Sebastidae	GCA_916700945.1	1.00612e+09	33	FishBase	NA	NA	NA	NA	NA	NA	NA	NA	NA	NA	NA	NA	8	50	42	304133040	30.44	10.2439	103066191
Actinopteri	Sebastes_mystinus	72088	Chordata	Actinopteri	Perciformes	Sebastidae	GCA_916701245.1	9.72244e+08	61	FishBase	NA	NA	NA	NA	44	AnAge	2084.5	AnAge	NA	NA	1459.5	AnAge	0	550	550	291863836	30.23	9.94633	96702595
Actinopteri	Sebastes_flavidus	72076	Chordata	Actinopteri	Perciformes	Sebastidae	GCA_916700785.1	9.78577e+08	66	FishBase	NA	NA	NA	NA	64	AnAge	1380.5	AnAge	NA	NA	2372.5	AnAge	0	549	549	306237288	31.51	11.253	110119539
Actinopteri	Sebastes_miniatus	72087	Chordata	Actinopteri	Perciformes	Sebastidae	GCA_916701275.1	1.03551e+09	91	FishBase	NA	NA	NA	NA	43	AnAge	3700	AnAge	NA	NA	NA	NA	15	274	259	278373588	27.07	10.6727	110517124
Actinopteri	Sebastes_moseri	394697	Chordata	Actinopteri	Perciformes	Sebastidae	GCA_916701315.1	9.65548e+08	NA	NA	NA	NA	NA	NA	NA	NA	NA	NA	NA	NA	NA	NA	128	183	55	292877532	30.54	10.233	98804337
Actinopteri	Sebastes_scythropus	173978	Chordata	Actinopteri	Perciformes	Sebastidae	GCA_916701475.1	9.43712e+08	25	FishBase	NA	NA	NA	NA	NA	NA	NA	NA	NA	NA	NA	NA	150	300	150	278435604	29.71	9.27848	87562147
Actinopteri	Sebastes_joyneri	160817	Chordata	Actinopteri	Perciformes	Sebastidae	GCA_916701105.1	9.50392e+08	NA	NA	NA	NA	NA	NA	NA	NA	NA	NA	NA	NA	NA	NA	NA	NA	NA	275737868	29.21	8.81696	83795707
Actinopteri	Sebastes_hubbsi	201703	Chordata	Actinopteri	Perciformes	Sebastidae	GCA_916701285.1	9.66886e+08	15.6	FishBase	NA	NA	NA	NA	NA	NA	NA	NA	NA	NA	NA	NA	NA	NA	NA	300807700	31.33	10.566	102161175
Actinopteri	Sebastes_pachycephalus	201706	Chordata	Actinopteri	Perciformes	Sebastidae	GCA_916701075.1	9.63276e+08	42	FishBase	NA	NA	NA	NA	NA	NA	1560	FishBase	NA	NA	NA	NA	NA	NA	NA	303205284	31.69	10.8649	104659269
Actinopteri	Sebastes_schlegelii	214486	Chordata	Actinopteri	Perciformes	Sebastidae	GCA_014673565.1	1.03222e+09	65	FishBase	NA	NA	NA	NA	20	FishBase	3140	FishBase	NA	NA	NA	NA	3	100	97	332405672	32.42	11.7918	121716768
Actinopteri	Perca_flavescens	8167	Chordata	Actinopteri	Perciformes	Percidae	GCA_004354835.1	899760000	50	FishBase	NA	NA	NA	NA	12	AnAge	1055.25	AnAge	NA	NA	NA	NA	0	56	56	231211256	25.87	14.3792	129377864
Actinopteri	Perca_fluviatilis	8168	Chordata	Actinopteri	Perciformes	Percidae	GCA_010015445.1	1193160000	60	FishBase	NA	NA	NA	NA	22	AnAge	2612.5	AnAge	NA	NA	1094.5	AnAge	1	30	29	544336440	45.94	34.7423	414531690
Actinopteri	Sander_lucioperca	283035	Chordata	Actinopteri	Perciformes	Percidae	GCA_008315115.2	1114920000	100	FishBase	NA	NA	NA	NA	16	AnAge	11000	AnAge	NA	NA	1338	AnAge	2	30	28	413315504	37.32	20.1574	224739170
Actinopteri	Coreoperca_whiteheadi	228250	Chordata	Actinopteri	Centrarchiformes	Sinipercidae	GCA_011952105.1	8.68129e+08	21.8	FishBase	NA	NA	NA	NA	NA	NA	NA	NA	NA	NA	NA	NA	NA	NA	NA	228164756	26.46	18.0617	156798668
Actinopteri	Siniperca_chuatsi	119488	Chordata	Actinopteri	Centrarchiformes	Sinipercidae	GCA_020085105.1	880200000	70	FishBase	NA	NA	NA	NA	9	FishBase	8000	FishBase	NA	NA	NA	NA	10	NA	NA	179056040	20.48	8.14478	71690354
Actinopteri	Siniperca_knerii	214812	Chordata	Actinopteri	Centrarchiformes	Sinipercidae	GCA_011952075.1	8.81579e+08	35.5	FishBase	NA	NA	NA	NA	NA	NA	739.8	FishBase	NA	NA	NA	NA	NA	NA	NA	189825888	21.68	12.3168	108581948
Actinopteri	Siniperca_scherzeri	228252	Chordata	Actinopteri	Centrarchiformes	Sinipercidae	GCA_011952095.1	8.96827e+08	37.4	FishBase	NA	NA	NA	NA	NA	NA	607.3	FishBase	NA	NA	NA	NA	NA	NA	NA	201148572	22.58	13.2735	119040324
Actinopteri	Micropterus_salmoides	27706	Chordata	Actinopteri	Centrarchiformes	Centrarchidae	GCA_014851395.1	997560000	97	FishBase	NA	NA	NA	NA	23	AnAge	5527.5	AnAge	NA	NA	1459.5	AnAge	0	6	6	885610260	89.39	89.0115	887943003
Actinopteri	Maccullochella_peelii	135761	Chordata	Actinopteri	Centrarchiformes	Percichthyidae	GCA_002120245.1	7.72258e+08	180	FishBase	NA	NA	NA	NA	48	AnAge	62000	AnAge	NA	NA	NA	NA	NA	5	NA	250826428	32.61	22.5736	174326405
Actinopteri	Macquaria_ambigua	135764	Chordata	Actinopteri	Centrarchiformes	Percichthyidae	GCA_008360985.1	8.06375e+08	76	FishBase	NA	NA	NA	NA	20	AnAge	13200	AnAge	NA	NA	1277	AnAge	10	NA	NA	144079456	17.98	8.86323	71470920
Actinopteri	Macquaria_australasica	135765	Chordata	Actinopteri	Centrarchiformes	Percichthyidae	GCA_005408345.1	8.23982e+08	46	FishBase	NA	NA	NA	NA	NA	NA	3500	FishBase	NA	NA	NA	NA	0	4	4	NA	NA	NA	NA
Actinopteri	Collichthys_lucidus	240159	Chordata	Actinopteri	NA	Sciaenidae	GCA_004119915.2	1.06803e+09	17	FishBase	NA	NA	NA	NA	NA	NA	NA	NA	NA	NA	NA	NA	NA	90	NA	NA	NA	NA	NA
Actinopteri	Larimichthys_crocea	215358	Chordata	Actinopteri	NA	Sciaenidae	GCA_000972845.2	8.02151e+08	NA	NA	NA	NA	NA	NA	NA	NA	NA	NA	NA	NA	NA	NA	NA	NA	NA	NA	NA	NA	NA
Actinopteri	Nibea_albiflora	240163	Chordata	Actinopteri	NA	Sciaenidae	GCA_014281875.1	7.65405e+08	43.5	FishBase	NA	NA	NA	NA	4	FishBase	1479	FishBase	NA	NA	NA	NA	25	80	55	95492876	12.56	9.14407	69989177
Actinopteri	Lutjanus_erythropterus	211835	Chordata	Actinopteri	Lutjaniformes	Lutjanidae	GCA_020091685.1	1.17971e+09	81.6	FishBase	NA	NA	NA	NA	8	AnAge	NA	NA	NA	NA	NA	NA	5	100	95	NA	NA	NA	NA
Actinopteri	Datnioides_undecimradiatus	1333648	Chordata	Actinopteri	Lobotiformes	Datnioididae	GCA_008933995.1	7.26016e+08	40	FishBase	NA	NA	NA	NA	NA	NA	NA	NA	NA	NA	NA	NA	NA	NA	NA	42984828	5.98	4.66559	33872929
Actinopteri	Sparus_aurata	8175	Chordata	Actinopteri	Spariformes	Sparidae	GCA_900880675.2	929100000	70	FishBase	NA	NA	NA	NA	11	AnAge	9460	AnAge	NA	NA	NA	NA	1	150	149	136406772	14.78	9.30737	86474762
Actinopteri	Lophius_piscatorius	8074	Chordata	Actinopteri	Lophiiformes	Lophiidae	GCA_009660295.1	9.10384e+08	200	FishBase	NA	NA	NA	NA	24	AnAge	31735	AnAge	NA	NA	1642	AnAge	20	1000	980	192321784	21.27	9.77964	89032321
Actinopteri	Pao_palembangensis	1820603	Chordata	Actinopteri	Tetraodontiformes	Tetraodontidae	GCA_015343265.1	4.36757e+08	19.4	FishBase	NA	NA	NA	NA	NA	NA	NA	NA	NA	NA	NA	NA	NA	NA	NA	62569892	14.48	9.07265	39625417
Actinopteri	Takifugu_bimaculatus	433685	Chordata	Actinopteri	Tetraodontiformes	Tetraodontidae	GCA_004026145.2	4.95179e+08	30	FishBase	NA	NA	NA	NA	NA	NA	NA	NA	NA	NA	NA	NA	NA	NA	NA	75402532	15.33	12.2349	60584775
Actinopteri	Takifugu_flavidus	433684	Chordata	Actinopteri	Tetraodontiformes	Tetraodontidae	GCA_003711565.2	4.49156e+08	35	FishBase	NA	NA	NA	NA	NA	NA	NA	NA	NA	NA	NA	NA	NA	NA	NA	68281176	15.31	11.9425	53640618
Actinopteri	Takifugu_rubripes	31033	Chordata	Actinopteri	Tetraodontiformes	Tetraodontidae	GCA_901000725.3	4.70748e+08	80	FishBase	NA	NA	NA	NA	NA	NA	NA	NA	NA	NA	NA	NA	NA	NA	NA	47192952	10.09	8.27841	38970464
Actinopteri	Thamnaconus_septentrionalis	435163	Chordata	Actinopteri	Tetraodontiformes	Monacanthidae	GCA_009823395.1	5.79899e+08	23	FishBase	NA	NA	NA	NA	NA	NA	NA	NA	NA	NA	NA	NA	NA	NA	NA	NA	NA	NA	NA
Actinopteri	Cheilinus_undulatus	241271	Chordata	Actinopteri	Labriformes	Labridae	GCA_018320785.1	1.42611e+09	229	FishBase	NA	NA	NA	NA	32	FishBase	191000	FishBase	NA	NA	NA	NA	1	100	99	476979000	33.68	9.2232	131533431
Actinopteri	Thalassoma_bifasciatum	76338	Chordata	Actinopteri	Labriformes	Labridae	GCA_008086565.1	1.33224e+09	25	FishBase	NA	NA	NA	NA	3	AnAge	NA	NA	NA	NA	NA	NA	0	40	40	NA	NA	NA	NA
Actinopteri	Symphodus_melops	171736	Chordata	Actinopteri	Labriformes	Labridae	GCA_002819105.1	7.49659e+08	28	FishBase	NA	NA	NA	NA	9	AnAge	NA	NA	NA	NA	912	AnAge	NA	NA	NA	165004092	22.1	17.0593	127886208
Actinopteri	Callionymus_lyra	34785	Chordata	Actinopteri	Syngnathiformes	Callionymidae	GCA_016630915.1	6.94151e+08	30.5	FishBase	NA	NA	NA	NA	7	AnAge	NA	NA	NA	NA	NA	NA	5	430	425	135914696	19.79	11.3066	78484739
Actinopteri	Synchiropus_splendidus	270530	Chordata	Actinopteri	Syngnathiformes	Callionymidae	GCA_019776025.1	5.90328e+08	7	FishBase	NA	NA	NA	NA	NA	NA	NA	NA	NA	NA	NA	NA	1	18	17	53981252	9.2	5.00611	29552490
Actinopteri	Hippocampus_abdominalis	109274	Chordata	Actinopteri	Syngnathiformes	Syngnathidae	GCA_018466805.1	567240000	NA	NA	NA	NA	NA	NA	NA	NA	NA	NA	NA	NA	NA	NA	NA	NA	NA	NA	NA	NA	NA
Actinopteri	Syngnathus_acus	161584	Chordata	Actinopteri	Syngnathiformes	Syngnathidae	GCA_901709675.2	3.98376e+08	50	FishBase	NA	NA	NA	NA	NA	NA	NA	NA	NA	NA	NA	NA	0	110	110	74070468	18.72	15.0567	59982192
Actinopteri	Euthynnus_affinis	8227	Chordata	Actinopteri	Scombriformes	Scombridae	GCA_019973915.1	9.23552e+08	100	FishBase	NA	NA	NA	NA	10	AnAge	7700	AnAge	NA	NA	NA	NA	0	200	200	108935872	11.87	6.49024	59940712
Actinopteri	Thunnus_albacares	8236	Chordata	Actinopteri	Scombriformes	Scombridae	GCA_914725855.1	880200000	239	FishBase	NA	NA	NA	NA	9	AnAge	200000	FishBase	NA	NA	NA	NA	1	250	249	117082196	13.39	5.92437	52146282
Actinopteri	Thunnus_orientalis	8238	Chordata	Actinopteri	Scombriformes	Scombridae	GCA_009176245.1	9.57868e+08	300	FishBase	NA	NA	NA	NA	15	FishBase	450000	FishBase	NA	NA	NA	NA	1	550	549	197512224	20.77	8.62596	82625346
Actinopteri	Bostrychus_sinensis	86224	Chordata	Actinopteri	Gobiiformes	Eleotridae	GCA_018703735.1	1.05307e+09	22	FishBase	NA	NA	NA	NA	NA	NA	NA	NA	NA	NA	NA	NA	NA	NA	NA	386177996	36.92	26.1382	275254628
Actinopteri	Mugilogobius_chulae	88201	Chordata	Actinopteri	Gobiiformes	Gobiidae	GCA_016735935.1	1.22023e+09	4	FishBase	NA	NA	NA	NA	NA	NA	NA	NA	NA	NA	NA	NA	NA	NA	NA	467115612	38.53	16.3056	198965453
Actinopteri	Rhinogobius_similis	1263952	Chordata	Actinopteri	Gobiiformes	Gobiidae	GCA_019453435.1	1.08314e+09	10	FishBase	NA	NA	NA	NA	NA	NA	NA	NA	NA	NA	NA	NA	NA	NA	NA	357595336	33.25	16.7623	181559119
Actinopteri	Periophthalmus_modestus	146921	Chordata	Actinopteri	Gobiiformes	Gobiidae	GCA_019594935.1	1.03996e+09	10	FishBase	NA	NA	NA	NA	NA	NA	NA	NA	NA	NA	NA	NA	NA	NA	NA	201185288	19.48	6.15359	63994627
Actinopteri	Siphamia_tubifer	1536898	Chordata	Actinopteri	Kurtiformes	Apogonidae	GCA_020466265.1	1.45924e+09	7	FishBase	NA	NA	NA	NA	NA	NA	NA	NA	NA	NA	NA	NA	0	100	100	522719500	36.07	13.9146	203047569
Actinopteri	Sphaeramia_orbicularis	375764	Chordata	Actinopteri	Kurtiformes	Apogonidae	GCA_902148855.1	1.63089e+09	10	FishBase	NA	NA	NA	NA	NA	NA	NA	NA	NA	NA	NA	NA	0	5	5	552924368	34.14	12.972	211559025
Actinopteri	Thalassophryne_amazonica	390379	Chordata	Actinopteri	Batrachoidiformes	Batrachoididae	GCA_902500255.1	2.96701e+09	9.3	FishBase	NA	NA	NA	NA	NA	NA	NA	NA	NA	NA	NA	NA	NA	NA	NA	1579907384	53.62	31.1346	923766299
Actinopteri	Myripristis_murdjan	586833	Chordata	Actinopteri	Holocentriformes	Holocentridae	GCA_902150065.1	1.01676e+09	60	FishBase	NA	NA	NA	NA	NA	NA	NA	NA	NA	NA	NA	NA	1	50	49	125782596	12.45	8.44492	85864625
Actinopteri	Gadus_morhua	8049	Chordata	Actinopteri	Gadiformes	Gadidae	GCA_902167405.1	909540000	200	FishBase	NA	NA	NA	NA	25	AnAge	52800	AnAge	NA	NA	784	AnAge	0	600	600	189566464	20.99	15.1878	138138685
Actinopteri	Mallotus_villosus	30960	Chordata	Actinopteri	Osmeriformes	Salangidae	GCA_903064625.1	5.99952e+08	20	FishBase	NA	NA	NA	NA	10	AnAge	52	FishBase	NA	NA	1095	AnAge	0	725	725	NA	NA	NA	NA
Actinopteri	Plecoglossus_altivelis	61084	Chordata	Actinopteri	Osmeriformes	Plecoglossidae	GCA_019972215.1	5.49393e+08	70	FishBase	NA	NA	NA	NA	3	AnAge	NA	NA	NA	NA	NA	NA	10	NA	NA	89457452	16.44	8.6036	47267605
Actinopteri	Protosalanx_chinensis	240822	Chordata	Actinopteri	Osmeriformes	Salangidae	GCA_010882115.1	5.70681e+08	17	FishBase	NA	NA	NA	NA	NA	NA	NA	NA	NA	NA	NA	NA	NA	NA	NA	71988880	12.7	9.18081	52393176
Actinopteri	Oncorhynchus_gorbuscha	8017	Chordata	Actinopteri	Salmoniformes	Salmonidae	GCA_017355495.1	2513460000	76	FishBase	NA	NA	NA	NA	3	AnAge	3740	AnAge	NA	NA	730	AnAge	0	250	250	NA	NA	NA	NA
Actinopteri	Oncorhynchus_keta	8018	Chordata	Actinopteri	Salmoniformes	Salmonidae	GCA_012931545.1	2435220000	100	FishBase	NA	NA	NA	NA	7	AnAge	8745	AnAge	NA	NA	1186	AnAge	0	250	250	529151052	21.87	9.66123	235272291
Actinopteri	Oncorhynchus_nerka	8023	Chordata	Actinopteri	Salmoniformes	Salmonidae	GCA_006149115.1	2801970000	84	FishBase	NA	NA	NA	NA	8	AnAge	4240.5	AnAge	NA	NA	730	AnAge	0	250	250	1523333520	54.6	25.0239	701160884
Actinopteri	Oncorhynchus_mykiss	8022	Chordata	Actinopteri	Salmoniformes	Salmonidae	GCA_013265735.3	2630820000	122	FishBase	NA	NA	NA	NA	11	AnAge	12235	AnAge	NA	NA	912	AnAge	0	200	200	NA	NA	NA	NA
Actinopteri	Oncorhynchus_kisutch	8019	Chordata	Actinopteri	Salmoniformes	Salmonidae	GCA_002021735.2	2542800000	107.95	FishBase	NA	NA	NA	NA	5	AnAge	8360	AnAge	NA	NA	1095	AnAge	0	250	250	877177252	34.74	16.2002	411938121
Actinopteri	Oncorhynchus_tshawytscha	74940	Chordata	Actinopteri	Salmoniformes	Salmonidae	GCA_018296145.1	2396100000	150	FishBase	NA	NA	NA	NA	9	AnAge	33770	AnAge	NA	NA	1460	AnAge	0	375	375	NA	NA	NA	NA
Actinopteri	Salmo_trutta	8032	Chordata	Actinopteri	Salmoniformes	Salmonidae	GCA_901001165.2	2.87658e+09	140	FishBase	NA	NA	NA	NA	38	AnAge	50000	FishBase	NA	NA	NA	NA	0	28	28	1175051728	41.14	19.98	574741342
Actinopteri	Salvelinus_namaycush	8040	Chordata	Actinopteri	Salmoniformes	Salmonidae	GCA_016432855.1	2973120000	150	FishBase	NA	NA	NA	NA	50	AnAge	17985	AnAge	NA	NA	4836	AnAge	3	61	58	NA	NA	NA	NA
Actinopteri	Salvelinus_sp._IW2-2015	2691554	Chordata	Actinopteri	Salmoniformes	Salmonidae	GCA_002910315.2	2.6317e+09	NA	NA	NA	NA	NA	NA	NA	NA	NA	NA	NA	NA	NA	NA	NA	NA	NA	1509145124	57.59	27.6266	727048361
Actinopteri	Arapaima_gigas	113544	Chordata	Actinopteri	Osteoglossiformes	Osteoglossidae	GCA_900497675.1	792180000	450	FishBase	NA	NA	NA	NA	NA	NA	200000	FishBase	NA	NA	NA	NA	NA	NA	NA	128319768	16.27	12.3357	97720960
Actinopteri	Heterotis_niloticus	91721	Chordata	Actinopteri	Osteoglossiformes	Osteoglossidae	GCA_018136845.1	8.17763e+08	NA	NA	NA	NA	NA	NA	NA	NA	NA	NA	NA	NA	NA	NA	NA	NA	NA	90796372	11.22	5.56352	45496460
Actinopteri	Scleropages_formosus	113540	Chordata	Actinopteri	Osteoglossiformes	Osteoglossidae	GCA_900964775.1	9.55407e+08	90	FishBase	NA	NA	NA	NA	NA	NA	NA	NA	NA	NA	NA	NA	NA	NA	NA	195558300	20.61	10.9253	104381546
Actinopteri	Gymnarchus_niloticus	42648	Chordata	Actinopteri	Osteoglossiformes	Gymnarchidae	GCA_009936485.1	7.97338e+08	NA	NA	NA	NA	NA	NA	NA	NA	NA	NA	NA	NA	NA	NA	NA	NA	NA	148757400	18.78	11.4599	91374449
Actinopteri	Lepisosteus_oculatus	7918	Chordata	Actinopteri	Semionotiformes	Lepisosteidae	GCA_000242695.1	1359420000	NA	NA	NA	NA	NA	NA	18	AnAge	2442	AnAge	NA	NA	NA	NA	NA	NA	NA	286847676	21.32	14.8923	202448446
Mammalia	Acomys_russatus	60746	Chordata	Mammalia	Rodentia	Muridae	GCA_903995435.1	2.79142e+09	11.108	Pantheria	NA	NA	3430	NA	NA	NA	42.4	Pantheria	0.00566038	AnAge	91	AnAge	NA	NA	NA	603505228	21.77	8.89134	248195015
Mammalia	Grammomys_surdaster	491861	Chordata	Mammalia	Rodentia	Muridae	GCA_004785775.1	2.92594e+09	NA	NA	NA	NA	NA	NA	NA	NA	NA	NA	NA	NA	NA	NA	NA	NA	NA	656995084	22.61	10.8544	317592695
Mammalia	Mus_minutoides	10105	Chordata	Mammalia	Rodentia	Muridae	GCA_902729485.2	3.43624e+09	NA	NA	3.44565	62	92.6	NA	3.1	Pantheria	6.44	Pantheria	0.0200311	AnAge	51.83	Pantheria	NA	NA	NA	1085542336	31.72	22.5795	775887228
Mammalia	Rattus_norvegicus	10116	Chordata	Mammalia	Rodentia	Muridae	GCA_015227675.2	2982900000	NA	NA	NA	91.25	NA	NA	3.8	AnAge	283	Pantheria	0.00496113	AnAge	47.68	Pantheria	NA	NA	NA	642935628	21.7	9.5913	286098757
Mammalia	Arvicola_amphibius	1047088	Chordata	Mammalia	Rodentia	Cricetidae	GCA_903992535.2	2.78688e+09	NA	NA	NA	NA	NA	NA	2.5	AnAge	120	AnAge	0.00510833	AnAge	48	AnAge	NA	NA	NA	525901804	19	7.59932	211783877
Mammalia	Microtus_agrestis	29092	Chordata	Mammalia	Rodentia	Cricetidae	GCA_902806775.1	3344760000	NA	NA	NA	52.5	1980	NA	3.3	Pantheria	35.9	Pantheria	0.0102228	AnAge	35.83	Pantheria	NA	NA	NA	NA	NA	NA	NA
Mammalia	Microtus_oregoni	111838	Chordata	Mammalia	Rodentia	Cricetidae	GCA_018167655.1	2885100000	9.931	Pantheria	NA	NA	543	NA	1.25	Pantheria	20.4	Pantheria	NA	NA	27.59	Pantheria	NA	NA	NA	NA	NA	NA	NA
Mammalia	Microtus_fortis	100897	Chordata	Mammalia	Rodentia	Cricetidae	GCA_014885135.1	2.65582e+09	NA	NA	NA	NA	NA	NA	NA	NA	NA	NA	NA	NA	114.06	Pantheria	NA	NA	NA	NA	NA	NA	NA
Mammalia	Myodes_glareolus	447135	Chordata	Mammalia	Rodentia	Cricetidae	GCA_004368595.1	2.90605e+09	NA	NA	NA	NA	NA	NA	4.9	AnAge	20.8	AnAge	0.015	AnAge	59.5	AnAge	NA	NA	NA	NA	NA	NA	NA
Mammalia	Ondatra_zibethicus	10060	Chordata	Mammalia	Rodentia	Cricetidae	GCA_004026605.1	2718840000	27.826	Pantheria	0.848054	365	NA	NA	10	Pantheria	992	Pantheria	0.00439819	AnAge	172.38	Pantheria	NA	NA	NA	NA	NA	NA	NA
Mammalia	Sigmodon_hispidus	42415	Chordata	Mammalia	Rodentia	Cricetidae	GCA_004025045.1	3872880000	16.749	Pantheria	1.4382	65	1750	NA	5.2	Pantheria	111	Pantheria	0.00977477	AnAge	43.97	Pantheria	NA	NA	NA	1424889908	36.95	23.8442	923456721
Mammalia	Onychomys_torridus	38674	Chordata	Mammalia	Rodentia	Cricetidae	GCA_903995425.1	2.99339e+09	9.495	Pantheria	1.36406	121.66	157	NA	4.6	Pantheria	21.7	Pantheria	0.00760369	AnAge	48.51	Pantheria	NA	NA	NA	NA	NA	NA	NA
Mammalia	Peromyscus_eremicus	42410	Chordata	Mammalia	Rodentia	Cricetidae	GCA_902702925.1	3.2901e+09	9.157	Pantheria	1.30441	NA	425	NA	7.4	AnAge	22.7	Pantheria	0.00762115	AnAge	44.11	Pantheria	NA	NA	NA	1092597148	33.42	14.8339	488051761
Mammalia	Peromyscus_leucopus	10041	Chordata	Mammalia	Rodentia	Cricetidae	GCA_004664715.2	3.00161e+09	9.496	Pantheria	1.87348	106.45	1420	2.8	3.16667	Pantheria	18.1	Pantheria	0.011768	AnAge	39.31	Pantheria	NA	NA	NA	786009752	26.44	11.8791	356563154
Mammalia	Mesocricetus_auratus	10036	Chordata	Mammalia	Rodentia	Cricetidae	GCA_017639785.1	3354540000	18	Pantheria	NA	73.6	NA	NA	10	Pantheria	98.6	Pantheria	0.00699797	AnAge	44.32	Pantheria	NA	NA	NA	NA	NA	NA	NA
Mammalia	Cricetomys_gambianus	10085	Chordata	Mammalia	Rodentia	Nesomyidae	GCA_004027575.1	2.90786e+09	36.307	Pantheria	0.805024	212.91	NA	NA	8.4	AnAge	1270	Pantheria	0.00474331	AnAge	155.18	Pantheria	NA	NA	NA	759377236	26.23	18.7665	545702893
Mammalia	Castor_canadensis	51338	Chordata	Mammalia	Rodentia	Castoridae	GCA_001984765.1	3.0538e+09	75.907	Pantheria	NA	NA	0.6	NA	15	Pantheria	18100	Pantheria	NA	NA	586.19	Pantheria	NA	NA	NA	833319356	27.47	11.3286	345951757
Mammalia	Dipodomys_spectabilis	105255	Chordata	Mammalia	Rodentia	Heteromyidae	GCA_019054845.1	3.44893e+09	14.114	Pantheria	NA	NA	403	NA	3	Pantheria	125	Pantheria	NA	NA	270.4	Pantheria	NA	NA	NA	NA	NA	NA	NA
Mammalia	Cavia_tschudii	143287	Chordata	Mammalia	Rodentia	Caviidae	GCA_004027695.1	4449900000	NA	NA	NA	NA	NA	NA	6.3	AnAge	1000	Pantheria	NA	NA	62	AnAge	NA	NA	NA	1690950456	38.16	23.6004	1050194654
Mammalia	Hydrochoerus_hydrochaeris	10149	Chordata	Mammalia	Rodentia	Hydrochaeridae	GCA_004027455.1	3.31558e+09	NA	NA	NA	NA	NA	NA	15.1	AnAge	55000	AnAge	0.000668255	AnAge	456	AnAge	NA	NA	NA	1261952924	38.22	19.9093	660109115
Mammalia	Chinchilla_lanigera	34839	Chordata	Mammalia	Rodentia	Chinchillidae	GCA_000276665.1	2.89956e+09	30.5	Pantheria	0.587708	NA	944	100	11.3	Pantheria	480	Pantheria	0.00272917	AnAge	194.32	Pantheria	NA	NA	NA	623172224	21.72	9.33246	270600589
Mammalia	Dinomys_branickii	108858	Chordata	Mammalia	Rodentia	Dinomyidae	GCA_004027595.1	3.25987e+09	74.999	Pantheria	NA	NA	NA	NA	9.4	Pantheria	12500	Pantheria	NA	NA	NA	NA	NA	NA	NA	1098827444	33.85	22.0298	718142819
Mammalia	Erethizon_dorsatum	34844	Chordata	Mammalia	Rodentia	Erethizontidae	GCA_006547115.1	2.95485e+09	83.749	Pantheria	NA	NA	3.5	NA	18	Pantheria	7420	Pantheria	NA	NA	661.25	Pantheria	NA	NA	NA	659167380	22.46	9.95126	294044625
Mammalia	Hystrix_cristata	10137	Chordata	Mammalia	Rodentia	Hystricidae	GCA_004026905.1	2.99645e+09	NA	NA	NA	NA	NA	NA	28	AnAge	13400	Pantheria	NA	NA	NA	NA	NA	NA	NA	867554636	29.07	19.4946	584144349
Mammalia	Ctenodactylus_gundi	10166	Chordata	Mammalia	Rodentia	Ctenodactylidae	GCA_004027205.1	2.81678e+09	20.799	Pantheria	NA	NA	NA	NA	5.8	AnAge	289	Pantheria	NA	NA	181.43	Pantheria	NA	NA	NA	718283508	25.61	19.9225	561172296
Mammalia	Cynomys_gunnisoni	45479	Chordata	Mammalia	Rodentia	Sciuridae	GCA_011316645.1	3.24269e+09	27.964	Pantheria	NA	NA	669	75	NA	NA	798	Pantheria	NA	NA	340.31	Pantheria	NA	NA	NA	1158506756	35.96	20.5596	666685659
Mammalia	Urocitellus_parryii	9999	Chordata	Mammalia	Rodentia	Sciuridae	GCA_003426925.1	3.05646e+09	NA	NA	NA	NA	NA	NA	NA	NA	NA	NA	NA	NA	NA	NA	NA	NA	NA	1031216156	33.97	20.6668	631673786
Mammalia	Marmota_flaviventris	93162	Chordata	Mammalia	Rodentia	Sciuridae	GCA_003676075.2	3.13011e+09	41.257	Pantheria	0.416765	730	6.9	NA	8	Pantheria	3710	Pantheria	0.00232507	AnAge	698.59	Pantheria	NA	NA	NA	660818388	21.25	8.16454	255559260
Mammalia	Marmota_himalayana	93163	Chordata	Mammalia	Rodentia	Sciuridae	GCA_005280165.1	2.9974e+09	NA	NA	NA	NA	NA	NA	NA	NA	NA	NA	NA	NA	NA	NA	NA	NA	NA	636411492	21.42	7.9833	239291288
Mammalia	Marmota_monax	9995	Chordata	Mammalia	Rodentia	Sciuridae	GCA_014533835.1	3.31847e+09	41.513	Pantheria	0.170747	NA	137	NA	10	Pantheria	3880	Pantheria	0.000952577	AnAge	349.29	Pantheria	NA	NA	NA	904833360	27.45	12.5203	415482121
Mammalia	Xerus_inauris	234690	Chordata	Mammalia	Rodentia	Sciuridae	GCA_004024805.1	3.1544e+09	24.699	Pantheria	0.542325	NA	NA	NA	13	Pantheria	572	Pantheria	0.00310315	AnAge	304.68	Pantheria	NA	NA	NA	889323020	28.31	16.8721	532212797
Mammalia	Sciurus_vulgaris	55149	Chordata	Mammalia	Rodentia	Sciuridae	GCA_902686455.2	3.48989e+09	21.349	Pantheria	NA	273.75	60.1	NA	12	Pantheria	333	Pantheria	NA	NA	313.67	Pantheria	NA	NA	NA	NA	NA	NA	NA
Mammalia	Sylvilagus_bachmani	365149	Chordata	Mammalia	Lagomorpha	Leporidae	GCA_015711505.1	3.25723e+09	30.407	Pantheria	NA	NA	568	NA	NA	NA	717	Pantheria	NA	NA	154	AnAge	NA	NA	NA	1002329288	30.97	10.2387	333499636
Mammalia	Alouatta_palliata	30589	Chordata	Mammalia	Primates	Atelidae	GCA_004027835.1	3550140000	57.723	Pantheria	0.308116	1382.13	59	NA	25	Pantheria	6580	Pantheria	0.00174225	AnAge	1368.74	Pantheria	NA	NA	NA	1022822912	28.94	19.6802	698675306
Mammalia	Ateles_geoffroyi	9509	Chordata	Mammalia	Primates	Atelidae	GCA_004024785.1	3119820000	43.373	Pantheria	NA	2080.5	19.2	NA	27.3	Pantheria	7610	Pantheria	NA	NA	1824.99	Pantheria	NA	NA	NA	756520264	24.35	14.3361	447260451
Mammalia	Ateles_hybridus	129801	Chordata	Mammalia	Primates	Atelidae	GCA_916098195.1	3.20506e+09	NA	NA	NA	NA	NA	NA	NA	NA	NA	NA	NA	NA	NA	NA	NA	NA	NA	NA	NA	NA	NA
Mammalia	Aotus_nancymaae	37293	Chordata	Mammalia	Primates	Aotidae	GCA_000952055.2	3.4694e+09	NA	NA	NA	NA	28.6	NA	NA	NA	795	Pantheria	NA	NA	NA	NA	NA	NA	NA	849121708	24.74	6.26197	217252968
Mammalia	Callithrix_jacchus	9483	Chordata	Mammalia	Primates	Cebidae	GCA_009663435.2	3354540000	NA	NA	0.522337	555.1	512	NA	16.8	Pantheria	291	Pantheria	0.00291409	AnAge	408.53	Pantheria	NA	NA	NA	558970312	16.77	4.68951	157311503
Mammalia	Saguinus_imperator	9491	Chordata	Mammalia	Primates	Cebidae	GCA_004024885.1	4.23437e+09	NA	NA	NA	NA	18.4	NA	20.2	Pantheria	410	Pantheria	NA	NA	638	AnAge	NA	NA	NA	1355813960	32.16	24.4719	1036230658
Mammalia	Sapajus_apella	9515	Chordata	Mammalia	Primates	Cebidae	GCA_009761245.1	3.30906e+09	NA	NA	NA	NA	NA	NA	46	AnAge	2642.5	AnAge	NA	NA	1703	AnAge	NA	NA	NA	734031452	22.33	9.41305	311483049
Mammalia	Pithecia_pithecia	43777	Chordata	Mammalia	Primates	Pitheciidae	GCA_004026645.1	3.5564e+09	34.709	Pantheria	NA	759.2	4.23	NA	20.7	Pantheria	1670	Pantheria	NA	NA	966.39	Pantheria	NA	NA	NA	NA	NA	NA	NA
Mammalia	Cercopithecus_mona	36226	Chordata	Mammalia	Primates	Cercopithecidae	GCA_014849445.1	3.51917e+09	51	Pantheria	NA	NA	NA	NA	30	Pantheria	3980	Pantheria	NA	NA	NA	NA	NA	NA	NA	676011976	19.34	6.10285	214769888
Mammalia	Macaca_fascicularis	9541	Chordata	Mammalia	Primates	Cercopithecidae	GCA_000364345.1	3374100000	51.5	Pantheria	NA	1410.72	50	23.6	38	Pantheria	4590	Pantheria	NA	NA	1143.07	Pantheria	NA	NA	NA	548263840	16.42	2.93485	99024779
Mammalia	Macaca_mulatta	9544	Chordata	Mammalia	Primates	Cercopithecidae	GCA_003339765.3	3511020000	55.499	Pantheria	0.347132	1460	11.1	48.9	36	Pantheria	6450	Pantheria	NA	NA	1089.04	Pantheria	NA	NA	NA	679313752	19.48	6.13436	215378437
Mammalia	Macaca_nemestrina	9545	Chordata	Mammalia	Primates	Cercopithecidae	GCA_000956065.1	3481680000	49.066	Pantheria	NA	1430.8	18.9	NA	34.3	Pantheria	7870	Pantheria	NA	NA	1069.22	Pantheria	NA	NA	NA	NA	NA	NA	NA
Mammalia	Papio_anubis	9555	Chordata	Mammalia	Primates	Cercopithecidae	GCA_008728515.1	3.47925e+09	NA	NA	NA	NA	NA	NA	NA	NA	14480	AnimalTraits	NA	NA	NA	NA	NA	NA	NA	597562104	17.3	3.61239	125684022
Mammalia	Theropithecus_gelada	9565	Chordata	Mammalia	Primates	Cercopithecidae	GCA_003255815.1	3.50323e+09	61.999	Pantheria	NA	1505.62	51.4	112	28	Pantheria	16000	Pantheria	NA	NA	1642.5	Pantheria	NA	NA	NA	544900284	15.66	4.3428	152138263
Mammalia	Pygathrix_nemaeus	54133	Chordata	Mammalia	Primates	Cercopithecidae	GCA_004024825.1	3.89963e+09	61	Pantheria	NA	NA	NA	9.3	25	Pantheria	9550	Pantheria	NA	NA	1460	AnAge	NA	NA	NA	1139438360	29.34	21.9136	854548519
Mammalia	Rhinopithecus_roxellana	61622	Chordata	Mammalia	Primates	Cercopithecidae	GCA_007565055.1	3.68338e+09	NA	NA	NA	NA	NA	NA	29.5	AnAge	14750	AnAge	NA	NA	NA	NA	NA	NA	NA	1100938528	30.08	22.3021	821470867
Mammalia	Gorilla_gorilla_gorilla	9595	Chordata	Mammalia	Primates	Hominidae	GCA_008122165.1	3.69112e+09	159.687	Pantheria	NA	3650	0.59	10	54	Pantheria	114000	Pantheria	NA	NA	2828.74	Pantheria	NA	NA	NA	914265724	24.95	6.66774	246114207
Mammalia	Pan_paniscus	9597	Chordata	Mammalia	Primates	Hominidae	GCA_013052645.3	3.88315e+09	75.458	Pantheria	NA	NA	2	90	48	Pantheria	35200	Pantheria	NA	NA	4686.85	Pantheria	NA	NA	NA	1220291068	31.56	24.7467	960950102
Mammalia	Pan_troglodytes	9598	Chordata	Mammalia	Primates	Hominidae	GCA_002880755.3	3383880000	79.756	Pantheria	0.199557	5073.5	1.64	45	60	Pantheria	45100	Pantheria	NA	NA	3309.15	Pantheria	NA	NA	NA	549240360	16.35	2.95247	99907994
Mammalia	Pongo_abelii	9601	Chordata	Mammalia	Primates	Hominidae	GCA_002880775.3	3.71554e+09	NA	NA	NA	NA	NA	NA	NA	NA	NA	NA	NA	NA	NA	NA	NA	NA	NA	735102580	19.91	5.3332	198157547
Mammalia	Hylobates_moloch	81572	Chordata	Mammalia	Primates	Hylobatidae	GCA_009828535.2	3168720000	67.753	Pantheria	NA	NA	6.18	NA	45	AnAge	5870	Pantheria	NA	NA	NA	NA	NA	NA	NA	428071388	13.59	3.51267	111306571
Mammalia	Nomascus_leucogenys	61853	Chordata	Mammalia	Primates	Hylobatidae	GCA_006542625.1	3.44798e+09	NA	NA	NA	NA	NA	NA	44.1	AnAge	6000	AnAge	NA	NA	NA	NA	NA	NA	NA	NA	NA	NA	NA
Mammalia	Daubentonia_madagascariensis	31869	Chordata	Mammalia	Primates	Daubentoniidae	GCA_004027145.1	3.02973e+09	40	Pantheria	NA	1277.5	39.8	1	24.3	Pantheria	2750	Pantheria	NA	NA	775.73	Pantheria	NA	NA	NA	NA	NA	NA	NA
Mammalia	Mirza_coquereli	47180	Chordata	Mammalia	Primates	Cheirogaleidae	GCA_004024645.1	2.83904e+09	NA	NA	NA	NA	NA	NA	17.4	AnAge	311.2	AnAge	NA	NA	293.5	AnAge	NA	NA	NA	612436628	21.66	12.9237	366910504
Mammalia	Mirza_zaza	339999	Chordata	Mammalia	Primates	Cheirogaleidae	GCA_008750895.1	2.86141e+09	NA	NA	NA	NA	NA	NA	NA	NA	NA	NA	NA	NA	NA	NA	NA	NA	NA	473060352	16.65	5.24138	149977236
Mammalia	Aeorestes_cinereus	257879	Chordata	Mammalia	Chiroptera	Vespertilionidae	GCA_011751065.1	2.6069e+09	NA	NA	NA	NA	NA	NA	NA	NA	NA	NA	NA	NA	NA	NA	NA	NA	NA	681281388	26.31	8.24801	215017081
Mammalia	Pipistrellus_kuhlii	59472	Chordata	Mammalia	Chiroptera	Vespertilionidae	GCA_014108245.1	1995120000	4.599	Pantheria	NA	NA	NA	NA	8	AnAge	6.04	Pantheria	NA	NA	NA	NA	NA	NA	NA	394518864	19.91	7.95227	158657259
Mammalia	Pipistrellus_pipistrellus	59474	Chordata	Mammalia	Chiroptera	Vespertilionidae	GCA_903992545.1	2.14017e+09	4	Pantheria	NA	NA	NA	3020	16.7	Pantheria	5.28	Pantheria	NA	NA	243.86	Pantheria	NA	NA	NA	450473312	21.19	8.02819	171816783
Mammalia	Myotis_myotis	51298	Chordata	Mammalia	Chiroptera	Vespertilionidae	GCA_014108235.1	2122260000	7.199	Pantheria	NA	730	NA	NA	22	Pantheria	25.7	Pantheria	NA	NA	347.68	Pantheria	NA	NA	NA	422467288	20.05	6.21939	131991686
Mammalia	Miniopterus_schreibersii	9433	Chordata	Mammalia	Chiroptera	Vespertilionidae	GCA_004026525.1	1887540000	NA	NA	NA	723.66	NA	4040	14	Pantheria	10.9	Pantheria	0.0133028	AnAge	577.91	Pantheria	NA	NA	NA	350693180	18.66	9.18741	173416089
Mammalia	Molossus_molossus	27622	Chordata	Mammalia	Chiroptera	Molossidae	GCA_014108415.1	2356980000	6.016	Pantheria	1.4587	NA	NA	NA	5.6	AnAge	13.8	Pantheria	NA	NA	87.1	Pantheria	NA	NA	NA	536006264	22.89	7.95352	187462857
Mammalia	Anoura_caudifer	27642	Chordata	Mammalia	Chiroptera	Phyllostomidae	GCA_004027475.1	2.67652e+09	5.866	Pantheria	3.27757	NA	NA	7.5	NA	NA	10.7	Pantheria	NA	NA	NA	NA	NA	NA	NA	NA	NA	NA	NA
Mammalia	Artibeus_jamaicensis	9417	Chordata	Mammalia	Chiroptera	Phyllostomidae	GCA_014825515.1	2591700000	7.835	Pantheria	1.35817	NA	NA	1000	10	Pantheria	41.6	Pantheria	0.00862981	AnAge	288.95	Pantheria	NA	NA	NA	561825044	21.82	6.99153	181199398
Mammalia	Sturnira_hondurensis	192404	Chordata	Mammalia	Chiroptera	Phyllostomidae	GCA_014824575.2	2.54343e+09	NA	NA	NA	NA	NA	NA	NA	NA	NA	NA	NA	NA	NA	NA	NA	NA	NA	529399124	20.95	8.61198	219039516
Mammalia	Tonatia_saurophila	171122	Chordata	Mammalia	Chiroptera	Phyllostomidae	GCA_004024845.1	2.55464e+09	NA	NA	NA	NA	NA	NA	NA	NA	NA	NA	NA	NA	NA	NA	NA	NA	NA	568543108	22.35	15.3353	391762195
Mammalia	Desmodus_rotundus	9430	Chordata	Mammalia	Chiroptera	Phyllostomidae	GCA_002940915.2	2337420000	7.8	Pantheria	0.810606	NA	NA	31.5	19.5	Pantheria	33	Pantheria	0.00587879	AnAge	285	AnAge	NA	NA	NA	313340880	13.55	2.95854	69153485
Mammalia	Micronycteris_hirsuta	148065	Chordata	Mammalia	Chiroptera	Phyllostomidae	GCA_004026765.1	2190720000	NA	NA	NA	NA	NA	NA	NA	NA	12.8	Pantheria	NA	NA	NA	NA	NA	NA	NA	460287864	21.1	11.4488	250811233
Mammalia	Mormoops_blainvillei	118852	Chordata	Mammalia	Chiroptera	Mormoopidae	GCA_004026545.1	2.56174e+09	NA	NA	NA	NA	NA	NA	NA	NA	NA	NA	NA	NA	NA	NA	NA	NA	NA	546344892	21.41	12.3487	316341707
Mammalia	Noctilio_leporinus	94963	Chordata	Mammalia	Chiroptera	Noctilionidae	GCA_004026585.1	2317860000	9.617	Pantheria	0.877446	NA	NA	NA	11.5	Pantheria	60.3	Pantheria	0.0066335	AnAge	NA	NA	NA	NA	NA	555413416	24.06	13.3339	309061991
Mammalia	Macroglossus_sobrinus	326083	Chordata	Mammalia	Chiroptera	Pteropodidae	GCA_004027375.1	2102700000	NA	NA	NA	NA	NA	5.25	NA	NA	21.8	Pantheria	NA	NA	NA	NA	NA	NA	NA	362915256	17.33	9.2941	195426975
Mammalia	Pteropus_giganteus	143291	Chordata	Mammalia	Chiroptera	Pteropodidae	GCA_902729225.1	2132040000	NA	NA	0.46088	NA	NA	550	31.4	Pantheria	818	Pantheria	0.00198289	AnAge	344.09	Pantheria	NA	NA	NA	328496344	15.52	5.40176	115167747
Mammalia	Pteropus_pselaphon	1496133	Chordata	Mammalia	Chiroptera	Pteropodidae	GCA_014363405.1	2.34566e+09	NA	NA	NA	NA	NA	NA	16.7	AnAge	NA	NA	NA	NA	NA	NA	NA	NA	NA	447705956	19.21	10.4929	246128147
Mammalia	Rousettus_aegyptiacus	9407	Chordata	Mammalia	Chiroptera	Pteropodidae	GCA_014176215.1	2063580000	NA	NA	NA	NA	NA	NA	22.9	AnAge	125	AnAge	0.005472	AnAge	365	AnAge	NA	NA	NA	184355140	8.99	2.63399	54354486
Mammalia	Megaderma_lyra	9413	Chordata	Mammalia	Chiroptera	Megadermatidae	GCA_004026885.1	3.17803e+09	7.399	Pantheria	NA	709.72	NA	350	14	Pantheria	38.9	Pantheria	NA	NA	522.62	Pantheria	NA	NA	NA	1152651176	36.41	23.1132	734546849
Mammalia	Ceratotherium_simum_simum	73337	Chordata	Mammalia	Perissodactyla	Rhinocerotidae	GCA_000283155.1	2.98852e+09	259.16	Pantheria	NA	2463.75	0.48	3.75	50	Pantheria	2260000	Pantheria	NA	NA	2368.44	Pantheria	NA	NA	NA	674084924	22.8	14.0671	420397843
Mammalia	Diceros_bicornis	9805	Chordata	Mammalia	Perissodactyla	Rhinocerotidae	GCA_004027315.2	3266520000	284.999	Pantheria	NA	2053.12	0.11	1	47	Pantheria	977000	Pantheria	NA	NA	1905.11	Pantheria	NA	NA	NA	1198193616	36.84	20.4909	669340751
Mammalia	Rhinoceros_unicornis	9809	Chordata	Mammalia	Perissodactyla	Rhinocerotidae	GCA_019022865.1	3.05993e+09	374.652	Pantheria	NA	2618.87	3.36	1.75	49	Pantheria	1830000	Pantheria	NA	NA	1750.87	Pantheria	NA	NA	NA	898546232	29.56	16.0341	490631349
Mammalia	Tapirus_indicus	9802	Chordata	Mammalia	Perissodactyla	Tapiridae	GCA_004024905.1	2689500000	222.485	Pantheria	NA	NA	0.11	1	30	Pantheria	308000	Pantheria	NA	NA	975.57	Pantheria	NA	NA	NA	617424848	23.05	13.6787	367889066
Mammalia	Tapirus_terrestris	9801	Chordata	Mammalia	Perissodactyla	Tapiridae	GCA_004025025.1	3696840000	200.869	Pantheria	NA	NA	0.86	NA	35	Pantheria	166000	Pantheria	NA	NA	729.53	Pantheria	NA	NA	NA	1109471172	30.14	19.3465	715209868
Mammalia	Equus_caballus	9796	Chordata	Mammalia	Perissodactyla	Equidae	GCA_002863925.1	3080700000	NA	NA	NA	912.5	NA	NA	62	Pantheria	400000	Pantheria	NA	NA	716.93	Pantheria	NA	NA	NA	696242444	22.75	9.0241	278005343
Mammalia	Ailuropoda_melanoleuca	9646	Chordata	Mammalia	Carnivora	Ursidae	GCA_002007445.2	2.96396e+09	135.37	Pantheria	NA	NA	0.18	NA	30	Pantheria	118000	Pantheria	NA	NA	2100.69	Pantheria	NA	NA	NA	471495508	16.06	5.65366	167572337
Mammalia	Ursus_arctos_horribilis	116960	Chordata	Mammalia	Carnivora	Ursidae	GCA_003584765.2	2.82425e+09	149.258	Pantheria	0.106074	1460	0.02	NA	50	Pantheria	196000	Pantheria	NA	NA	1150.39	Pantheria	NA	NA	NA	412451316	14.7	6.36411	179738194
Mammalia	Ursus_thibetanus_thibetanus	441215	Chordata	Mammalia	Carnivora	Ursidae	GCA_009660055.1	2.87866e+09	151.435	Pantheria	NA	1095	NA	NA	35.1667	Pantheria	99900	Pantheria	NA	NA	879.28	Pantheria	NA	NA	NA	463010328	16.19	6.96515	200503270
Mammalia	Arctocephalus_gazella	37190	Chordata	Mammalia	Carnivora	Otariidae	GCA_900642305.1	2.80602e+09	157.757	Pantheria	NA	1277.5	22	NA	23	Pantheria	96600	Pantheria	NA	NA	1465.47	Pantheria	NA	NA	NA	NA	NA	NA	NA
Mammalia	Eumetopias_jubatus	34886	Chordata	Mammalia	Carnivora	Otariidae	GCA_004028035.1	2.93272e+09	270.817	Pantheria	NA	NA	NA	NA	30	Pantheria	384000	Pantheria	NA	NA	1721.65	Pantheria	NA	NA	NA	501180484	17.2	8.10138	237590601
Mammalia	Callorhinus_ursinus	34884	Chordata	Mammalia	Carnivora	Otariidae	GCA_003265705.1	3.28203e+09	174.478	Pantheria	NA	NA	18	NA	35	Pantheria	55700	Pantheria	NA	NA	1464.98	Pantheria	NA	NA	NA	640683800	19.65	9.93207	325973163
Mammalia	Odobenus_rosmarus_divergens	9708	Chordata	Mammalia	Carnivora	Odobenidae	GCA_000321225.1	2.9108e+09	288.666	Pantheria	NA	1825	1.27	NA	40	Pantheria	1050000	Pantheria	NA	NA	2007.49	Pantheria	NA	NA	NA	565181412	19.6	13.4001	390050075
Mammalia	Halichoerus_grypus	9711	Chordata	Mammalia	Carnivora	Phocidae	GCA_012393455.1	2.83587e+09	208.195	Pantheria	0.195969	1825	NA	NA	46.6725	Pantheria	197000	Pantheria	NA	NA	1521.6	Pantheria	NA	NA	NA	748331140	26.56	15.8841	450452656
Mammalia	Phoca_vitulina	9720	Chordata	Mammalia	Carnivora	Phocidae	GCA_004348235.1	2.86655e+09	162.1	Pantheria	0.37057	1095	5.68	NA	40	Pantheria	87300	Pantheria	0.000839519	AnAge	1337.02	Pantheria	NA	NA	NA	NA	NA	NA	NA
Mammalia	Mirounga_angustirostris	9716	Chordata	Mammalia	Carnivora	Phocidae	GCA_004023865.1	2.91947e+09	373.523	Pantheria	NA	1460	NA	NA	20.2917	Pantheria	1120000	Pantheria	NA	NA	1318.92	Pantheria	NA	NA	NA	661613540	22.75	20.0371	584977788
Mammalia	Mirounga_leonina	9715	Chordata	Mammalia	Carnivora	Phocidae	GCA_011800145.1	2.93158e+09	369.512	Pantheria	NA	1460	NA	NA	23	Pantheria	1600000	Pantheria	NA	NA	1392.2	Pantheria	NA	NA	NA	452768668	15.54	6.83696	200430858
Mammalia	Ailurus_fulgens_styani	424585	Chordata	Mammalia	Carnivora	Ailuridae	GCA_002007465.1	2.84155e+09	58.34	Pantheria	0.162159	760.41	NA	NA	14	Pantheria	5170	Pantheria	0.000947389	AnAge	518.48	Pantheria	NA	NA	NA	465197260	16.55	7.01742	199403544
Mammalia	Enhydra_lutris_kenyoni	391180	Chordata	Mammalia	Carnivora	Mustelidae	GCA_002288905.2	2.97752e+09	144.395	Pantheria	0.438545	NA	6.47	NA	30	Pantheria	27500	Pantheria	0.00358105	AnAge	895.91	Pantheria	NA	NA	NA	477728156	16.15	6.34896	189041450
Mammalia	Lutra_lutra	9657	Chordata	Mammalia	Carnivora	Mustelidae	GCA_902655055.2	2.95716e+09	69.189	Pantheria	0.452032	NA	0.85	NA	22	Pantheria	8860	Pantheria	0.00283341	AnAge	607.06	Pantheria	NA	NA	NA	563608416	19.19	9.32557	275772107
Mammalia	Lontra_canadensis	76717	Chordata	Mammalia	Carnivora	Mustelidae	GCA_010015895.1	2.91757e+09	68.702	Pantheria	NA	730	1.13	NA	25	Pantheria	8090	Pantheria	NA	NA	617	Pantheria	NA	NA	NA	457227984	15.78	6.03857	176179464
Mammalia	Pteronura_brasiliensis	9672	Chordata	Mammalia	Carnivora	Mustelidae	GCA_004024605.1	3.15543e+09	114.452	Pantheria	NA	NA	NA	NA	12.8333	Pantheria	26000	Pantheria	NA	NA	730	AnAge	NA	NA	NA	793946588	25.27	20.8983	659433024
Mammalia	Mustela_nivalis	36239	Chordata	Mammalia	Carnivora	Mustelidae	GCA_019141155.1	3.03307e+09	18.926	Pantheria	2.5607	NA	12.9	NA	10	Pantheria	79.9	Pantheria	NA	NA	148.29	Pantheria	NA	NA	NA	NA	NA	NA	NA
Mammalia	Martes_zibellina	36722	Chordata	Mammalia	Carnivora	Mustelidae	GCA_012583365.1	2.93564e+09	45.249	Pantheria	NA	NA	0.07	NA	15	Pantheria	1170	Pantheria	NA	NA	417.44	Pantheria	NA	NA	NA	500967032	17.21	6.96401	204438232
Mammalia	Mellivora_capensis	9664	Chordata	Mammalia	Carnivora	Mustelidae	GCA_004024625.1	3.74716e+09	68.688	Pantheria	NA	NA	NA	NA	26.5	Pantheria	9000	Pantheria	NA	NA	NA	NA	NA	NA	NA	1160278736	31.1	23.6483	886140664
Mammalia	Spilogale_gracilis	30551	Chordata	Mammalia	Carnivora	Mephitidae	GCA_004023965.1	2.98725e+09	NA	NA	NA	NA	NA	NA	NA	NA	420	AnimalTraits	NA	NA	NA	NA	NA	NA	NA	684302820	23.01	12.5793	375774383
Mammalia	Canis_lupus_dingo	286419	Chordata	Mammalia	Carnivora	Canidae	GCA_012295265.1	2.90845e+09	105.707	Pantheria	0.321549	547.5	0.01	NA	29.5	Pantheria	35000	Pantheria	NA	NA	565.58	Pantheria	NA	NA	NA	392317432	13.58	4.98615	145019374
Mammalia	Canis_lupus_familiaris	9615	Chordata	Mammalia	Carnivora	Canidae	GCA_014441545.1	2.90681e+09	NA	NA	NA	NA	NA	NA	NA	NA	NA	NA	NA	NA	NA	NA	NA	NA	NA	NA	NA	NA	NA
Mammalia	Lycaon_pictus	9622	Chordata	Mammalia	Carnivora	Canidae	GCA_004216515.1	2669940000	92.557	Pantheria	0.466348	927.7	0.01	NA	11	Pantheria	22000	Pantheria	0.00150045	AnAge	715.98	Pantheria	NA	NA	NA	307507576	11.59	2.47406	66055863
Mammalia	Otocyon_megalotis_megalotis	2793302	Chordata	Mammalia	Carnivora	Canidae	GCA_017311455.1	2.87994e+09	54.072	Pantheria	NA	NA	1.2	NA	13.8	Pantheria	4000	Pantheria	NA	NA	364.99	Pantheria	NA	NA	NA	491286960	17.18	7.39188	212881922
Mammalia	Vulpes_vulpes	9627	Chordata	Mammalia	Carnivora	Canidae	GCA_003160815.1	2787300000	63.072	Pantheria	0.444793	NA	1.11	NA	15	Pantheria	4840	Pantheria	0.00283698	AnAge	279.13	Pantheria	NA	NA	NA	413219772	14.94	5.8304	162510867
Mammalia	Nyctereutes_procyonoides	34880	Chordata	Mammalia	Carnivora	Canidae	GCA_905146905.1	2.89498e+09	44.995	Pantheria	0.41218	730	12	NA	14	Pantheria	4220	Pantheria	NA	NA	279.83	Pantheria	NA	NA	NA	NA	NA	NA	NA
Mammalia	Crocuta_crocuta	9678	Chordata	Mammalia	Carnivora	Hyaenidae	GCA_008692635.1	2.84813e+09	130.758	Pantheria	NA	NA	0.13	NA	41.1	Pantheria	64000	Pantheria	NA	NA	712.95	Pantheria	NA	NA	NA	484942724	17.16	5.53302	157587935
Mammalia	Hyaena_hyaena	95912	Chordata	Mammalia	Carnivora	Hyaenidae	GCA_003009895.1	2.88003e+09	111.104	Pantheria	0.130564	NA	NA	NA	24	Pantheria	35100	Pantheria	0.00091037	AnAge	807.96	Pantheria	NA	NA	NA	479193928	16.75	6.01615	173267010
Mammalia	Proteles_cristata_cristata	2793304	Chordata	Mammalia	Carnivora	Hyaenidae	GCA_017311185.1	2.89726e+09	NA	NA	NA	NA	NA	NA	20	AnAge	10000	AnAge	0.0011563	AnAge	NA	NA	NA	NA	NA	571673328	19.86	10.0448	291024153
Mammalia	Cryptoprocta_ferox	94188	Chordata	Mammalia	Carnivora	Eupleridae	GCA_004023885.1	2.98184e+09	72.715	Pantheria	NA	NA	0.89	1	20	Pantheria	9500	Pantheria	NA	NA	1095	Pantheria	NA	NA	NA	663861836	22.36	15.0775	449587765
Mammalia	Helogale_parvula	210647	Chordata	Mammalia	Carnivora	Herpestidae	GCA_004023845.1	2.9015e+09	20.274	Pantheria	NA	NA	NA	NA	10.9167	Pantheria	285	Pantheria	NA	NA	368.85	Pantheria	NA	NA	NA	638712012	22.1	14.1169	409602212
Mammalia	Mungos_mungo	210652	Chordata	Mammalia	Carnivora	Herpestidae	GCA_004023785.1	2.96897e+09	36.45	Pantheria	NA	365	17.1	NA	12	Pantheria	1260	Pantheria	NA	NA	306.47	Pantheria	NA	NA	NA	671987700	22.73	14.7272	437246209
Mammalia	Felis_catus	9685	Chordata	Mammalia	Carnivora	Felidae	GCA_000181335.5	2845980000	NA	NA	NA	NA	NA	NA	30	AnAge	3900	AnAge	NA	NA	289	AnAge	NA	NA	NA	NA	NA	NA	NA
Mammalia	Felis_chaus	61376	Chordata	Mammalia	Carnivora	Felidae	GCA_019924945.1	2.94487e+09	70.821	Pantheria	NA	NA	NA	NA	12	Pantheria	7170	Pantheria	NA	NA	332.29	Pantheria	NA	NA	NA	466658956	15.95	5.93741	174849033
Mammalia	Puma_yagouaroundi	1608482	Chordata	Mammalia	Carnivora	Felidae	GCA_014898765.1	2.99914e+09	NA	NA	NA	NA	NA	NA	18.6	AnAge	7000	AnAge	0.00138429	AnAge	803	AnAge	NA	NA	NA	375139760	12.59	4.21797	126502811
Mammalia	Prionailurus_bengalensis	37029	Chordata	Mammalia	Carnivora	Felidae	GCA_016509475.2	2.95385e+09	68.715	Pantheria	NA	410.62	NA	NA	15	Pantheria	2790	Pantheria	NA	NA	741.36	Pantheria	NA	NA	NA	549068792	18.71	11.9395	352673839
Mammalia	Lynx_pardinus	191816	Chordata	Mammalia	Carnivora	Felidae	GCA_900661375.1	2.9266e+09	96.559	Pantheria	NA	NA	0.32	NA	NA	NA	11100	Pantheria	NA	NA	NA	NA	NA	NA	NA	397124788	13.7	3.8367	112285050
Mammalia	Panthera_leo	9689	Chordata	Mammalia	Carnivora	Felidae	GCA_018350215.1	2885100000	184.212	Pantheria	0.172457	1047.55	0.11	NA	30	Pantheria	159000	Pantheria	0.000594843	AnAge	873.24	Pantheria	NA	NA	NA	409260440	14.29	4.2214	121791492
Mammalia	Panthera_tigris	9694	Chordata	Mammalia	Carnivora	Felidae	GCA_018350195.2	2650380000	183.172	Pantheria	0.174828	1216.66	0.03	1	26.3	Pantheria	163000	Pantheria	0.000821221	AnAge	1318.92	Pantheria	NA	NA	NA	359097772	13.66	3.40192	90163799
Mammalia	Panthera_onca	9690	Chordata	Mammalia	Carnivora	Felidae	GCA_004023805.1	3.03713e+09	133.927	Pantheria	0.18682	NA	0.04	1	23	Pantheria	84900	Pantheria	0.000735206	AnAge	1025.83	Pantheria	NA	NA	NA	664990908	21.99	16.873	512455469
Mammalia	Paradoxurus_hermaphroditus	71117	Chordata	Mammalia	Carnivora	Viverridae	GCA_004024585.1	3.00409e+09	53.531	Pantheria	0.217453	NA	NA	NA	22.4167	Pantheria	3200	Pantheria	0.00172938	AnAge	344.99	Pantheria	NA	NA	NA	624843440	20.88	15.302	459685431
Mammalia	Manis_pentadactyla	143292	Chordata	Mammalia	Pholidota	Manidae	GCA_014570555.1	2.9102e+09	37.953	Pantheria	NA	NA	NA	NA	NA	NA	4670	Pantheria	0.000798073	AnAge	657.98	Pantheria	NA	NA	NA	686768232	23.8	10.3081	299985472
Mammalia	Aepyceros_melampus	9897	Chordata	Mammalia	Artiodactyla	Bovidae	GCA_006408695.1	4586820000	141.999	Pantheria	NA	730	13	NA	17.75	Pantheria	52300	Pantheria	NA	NA	394.41	Pantheria	NA	NA	NA	1797980884	39.47	25.4657	1168067111
Mammalia	Neotragus_moschatus	66442	Chordata	Mammalia	Artiodactyla	Bovidae	GCA_006410615.1	3.24434e+09	60	Pantheria	NA	NA	16.8	NA	14	Pantheria	5600	Pantheria	NA	NA	172.04	Pantheria	NA	NA	NA	1490428152	46.25	31.1149	1009471263
Mammalia	Ammotragus_lervia	9899	Chordata	Mammalia	Artiodactyla	Bovidae	GCA_002201775.1	3.21421e+09	145	Pantheria	NA	407.58	NA	NA	21	Pantheria	93200	Pantheria	NA	NA	456.25	Pantheria	NA	NA	NA	NA	NA	NA	NA
Mammalia	Beatragus_hunteri	59527	Chordata	Mammalia	Artiodactyla	Bovidae	GCA_004027495.1	3.27039e+09	NA	NA	NA	NA	NA	NA	NA	NA	159000	AnAge	NA	NA	NA	NA	NA	NA	NA	968229148	29.73	22.7189	742996538
Mammalia	Cephalophus_harveyi	129224	Chordata	Mammalia	Artiodactyla	Bovidae	GCA_006410635.1	3.41489e+09	NA	NA	NA	NA	NA	NA	NA	NA	14500	Pantheria	NA	NA	NA	NA	NA	NA	NA	1143215132	33.71	18.5478	633386019
Mammalia	Connochaetes_taurinus	9927	Chordata	Mammalia	Artiodactyla	Bovidae	GCA_006408615.1	3.20599e+09	201.499	Pantheria	0.135	730	7.77	NA	21.5	Pantheria	196000	Pantheria	0.00117384	AnAge	730	Pantheria	NA	NA	NA	752913900	23.64	10.2889	329859288
Mammalia	Oryx_dammah	59534	Chordata	Mammalia	Artiodactyla	Bovidae	GCA_014754425.2	3.28241e+09	191	Pantheria	NA	1001.31	NA	30	20.42	Pantheria	197000	Pantheria	NA	NA	639	AnAge	NA	NA	NA	561373472	17.22	5.85924	192324069
Mammalia	Capra_hircus	9925	Chordata	Mammalia	Artiodactyla	Bovidae	GCA_001704415.1	3168720000	NA	NA	NA	669.16	7.69	NA	20.8	Pantheria	46900	Pantheria	NA	NA	419.67	Pantheria	NA	NA	NA	NA	NA	NA	NA
Mammalia	Capra_sibirica	72544	Chordata	Mammalia	Artiodactyla	Bovidae	GCA_003182615.2	3.31369e+09	NA	NA	NA	NA	NA	NA	22.25	Pantheria	130000	Pantheria	NA	NA	NA	NA	NA	NA	NA	734498276	22.32	8.98651	297785271
Mammalia	Hemitragus_hylocrius	330464	Chordata	Mammalia	Artiodactyla	Bovidae	GCA_004026825.1	3.29192e+09	138.499	Pantheria	NA	669.16	NA	NA	17.25	Pantheria	73700	Pantheria	NA	NA	669	AnAge	NA	NA	NA	922285896	28.14	19.6007	645240688
Mammalia	Ovis_aries	9940	Chordata	Mammalia	Artiodactyla	Bovidae	GCA_016772045.1	3227400000	129.921	Pantheria	NA	730	NA	NA	19.17	Pantheria	34200	Pantheria	NA	NA	699.45	Pantheria	NA	NA	NA	NA	NA	NA	NA
Mammalia	Ovis_canadensis	37174	Chordata	Mammalia	Artiodactyla	Bovidae	GCA_004026945.1	3.47179e+09	156.789	Pantheria	0.296247	301.5	1.51	5.5	24	Pantheria	74600	Pantheria	0.00153718	AnAge	622.82	Pantheria	NA	NA	NA	1084781756	31.38	23.9785	832483738
Mammalia	Ovis_nivicola_lydekkeri	1867112	Chordata	Mammalia	Artiodactyla	Bovidae	GCA_903231385.1	3.17565e+09	NA	NA	NA	NA	NA	NA	NA	NA	90000	Pantheria	NA	NA	730	Pantheria	NA	NA	NA	625189104	19.9	4.86494	154493499
Mammalia	Kobus_leche_leche	91880	Chordata	Mammalia	Artiodactyla	Bovidae	GCA_014926565.1	3.35995e+09	NA	NA	NA	638.75	30.8	NA	18.58	Pantheria	87400	Pantheria	NA	NA	785.69	Pantheria	NA	NA	NA	1111672516	33.31	18.1773	610748275
Mammalia	Eudorcas_thomsonii	69308	Chordata	Mammalia	Artiodactyla	Bovidae	GCA_006408755.1	3.52095e+09	NA	NA	NA	NA	NA	NA	20	AnAge	25000	AnAge	NA	NA	365	AnAge	NA	NA	NA	1552189096	44.39	34.458	1213249133
Mammalia	Litocranius_walleri	69311	Chordata	Mammalia	Artiodactyla	Bovidae	GCA_006410535.1	3579480000	149.999	Pantheria	NA	562.7	0.42	NA	13	Pantheria	38500	Pantheria	NA	NA	730	Pantheria	NA	NA	NA	1190979820	33.5	19.5609	700179312
Mammalia	Bos_gaurus	9904	Chordata	Mammalia	Artiodactyla	Bovidae	GCA_014182915.2	3.29471e+09	NA	NA	NA	NA	NA	NA	NA	NA	NA	NA	NA	NA	NA	NA	NA	NA	NA	709261048	21.69	6.3077	207820452
Mammalia	Bos_taurus	9913	Chordata	Mammalia	Artiodactyla	Bovidae	GCA_002263795.2	3618600000	NA	NA	NA	NA	NA	NA	20	Pantheria	613000	Pantheria	0.00050044	AnAge	657.98	Pantheria	NA	NA	NA	1088553088	30.31	14.4328	522264903
Mammalia	Bubalus_bubalis	89462	Chordata	Mammalia	Artiodactyla	Bovidae	GCA_003121395.1	3.22019e+09	264.952	Pantheria	NA	NA	1.08	NA	28.25	Pantheria	919000	Pantheria	NA	NA	744.82	Pantheria	NA	NA	NA	955102940	29.86	17.092	550394717
Mammalia	Axis_porcinus	57737	Chordata	Mammalia	Artiodactyla	Cervidae	GCA_003798545.1	3.24486e+09	NA	NA	NA	NA	16.5	NA	20	Pantheria	37100	Pantheria	NA	NA	403.98	Pantheria	NA	NA	NA	1018732304	31.61	16.717	542443147
Mammalia	Cervus_canadensis	1574408	Chordata	Mammalia	Artiodactyla	Cervidae	GCA_019320065.1	3.06386e+09	NA	NA	NA	NA	NA	NA	NA	NA	200000	AnimalTraits	NA	NA	NA	NA	NA	NA	NA	1078349844	35.44	23.4833	719496236
Mammalia	Cervus_hanglu_yarkandensis	84702	Chordata	Mammalia	Artiodactyla	Cervidae	GCA_010411085.1	3.14556e+09	NA	NA	NA	NA	NA	NA	NA	NA	NA	NA	NA	NA	NA	NA	NA	NA	NA	852038140	27.27	16.3925	515635865
Mammalia	Cervus_elaphus	9860	Chordata	Mammalia	Artiodactyla	Cervidae	GCA_910594005.1	3.49956e+09	213.997	Pantheria	NA	993.71	2.9	NA	26.8	Pantheria	240000	Pantheria	0.000468458	AnAge	549.36	Pantheria	NA	NA	NA	1007269624	28.98	19.047	666560454
Mammalia	Muntiacus_muntjak	9888	Chordata	Mammalia	Artiodactyla	Cervidae	GCA_008782695.1	3364320000	99.5	Pantheria	NA	NA	3.17	NA	17.6	Pantheria	17400	Pantheria	NA	NA	293.09	Pantheria	NA	NA	NA	659567944	19.74	7.87634	264985204
Mammalia	Muntiacus_reevesi	9886	Chordata	Mammalia	Artiodactyla	Cervidae	GCA_008787405.2	2787300000	NA	NA	NA	NA	0.67	NA	23.2	AnAge	13500	Pantheria	NA	NA	274.37	Pantheria	NA	NA	NA	671750624	24.27	12.3875	345276022
Mammalia	Capreolus_pygargus	48560	Chordata	Mammalia	Artiodactyla	Cervidae	GCA_012922965.1	3.16216e+09	131.999	Pantheria	NA	NA	80	NA	NA	NA	41000	Pantheria	NA	NA	769.84	Pantheria	NA	NA	NA	714463516	22.74	10.6539	336892539
Mammalia	Hydropotes_inermis	9883	Chordata	Mammalia	Artiodactyla	Cervidae	GCA_006459105.1	3.06817e+09	NA	NA	NA	NA	NA	NA	12	Pantheria	12700	Pantheria	NA	NA	270.66	Pantheria	NA	NA	NA	1066593924	35	26.038	798890561
Mammalia	Odocoileus_hemionus_hemionus	9877	Chordata	Mammalia	Artiodactyla	Cervidae	GCA_004115125.1	2.84247e+09	151.881	Pantheria	NA	547.5	16	NA	22	Pantheria	83800	Pantheria	NA	NA	451.19	Pantheria	NA	NA	NA	1041711816	36.9	22.3868	636339275
Mammalia	Odocoileus_virginianus_texanus	9880	Chordata	Mammalia	Artiodactyla	Cervidae	GCA_002102435.1	2.88702e+09	151.599	Pantheria	NA	463	17.3	NA	23	Pantheria	75000	Pantheria	0.00164596	AnAge	285.56	Pantheria	NA	NA	NA	1015828244	35.57	21.9725	634348953
Mammalia	Giraffa_camelopardalis_rothschildi	2740528	Chordata	Mammalia	Artiodactyla	Giraffidae	GCA_017591445.1	2.96082e+09	418.477	Pantheria	NA	1825	1.2	NA	36.3	Pantheria	955000	Pantheria	NA	NA	1400.58	Pantheria	NA	NA	NA	635486768	21.6	9.20066	272414883
Mammalia	Antilocapra_americana	9891	Chordata	Mammalia	Artiodactyla	Antilocapridae	GCA_007570785.1	3.04262e+09	131.199	Pantheria	0.191045	365	0.83	1000	12	Pantheria	46900	Pantheria	0.00108684	AnAge	457.8	Pantheria	NA	NA	NA	726081096	24.03	13.2302	402542829
Mammalia	Tragulus_javanicus	9849	Chordata	Mammalia	Artiodactyla	Tragulidae	GCA_004024965.2	3.14052e+09	51.429	Pantheria	0.466364	NA	NA	NA	12	Pantheria	1870	Pantheria	0.00261123	AnAge	137.08	Pantheria	NA	NA	NA	NA	NA	NA	NA
Mammalia	Balaenoptera_musculus	9771	Chordata	Mammalia	Artiodactyla	Balaenopteridae	GCA_009873245.3	2.8802e+09	3048	Pantheria	NA	NA	NA	1	110	Pantheria	154000000	Pantheria	NA	NA	1679	Pantheria	NA	NA	NA	NA	NA	NA	NA
Mammalia	Delphinapterus_leucas	9749	Chordata	Mammalia	Artiodactyla	Monodontidae	GCA_002288925.3	3217620000	425.63	Pantheria	NA	NA	NA	NA	40	Pantheria	1380000	Pantheria	NA	NA	1824.99	Pantheria	NA	NA	NA	982032752	30.73	16.3014	524515601
Mammalia	Monodon_monoceros	40151	Chordata	Mammalia	Artiodactyla	Monodontidae	GCA_005190385.2	2.85685e+09	510.028	Pantheria	NA	NA	NA	NA	40	Pantheria	938000	Pantheria	NA	NA	2249.4	Pantheria	NA	NA	NA	764813824	26.95	15.8207	451973800
Mammalia	Phocoena_phocoena	9742	Chordata	Mammalia	Artiodactyla	Phocoenidae	GCA_004363495.1	3.27494e+09	153.148	Pantheria	NA	1642.5	0.03	4	15	Pantheria	52700	Pantheria	0.00204317	AnAge	1177.07	Pantheria	NA	NA	NA	978469964	30	21.191	693991835
Mammalia	Phocoena_sinus	42100	Chordata	Mammalia	Artiodactyla	Phocoenidae	GCA_008692025.1	2.87615e+09	152	Pantheria	NA	NA	NA	NA	NA	NA	43100	Pantheria	NA	NA	NA	NA	NA	NA	NA	578061360	20.24	5.92497	170411022
Mammalia	Globicephala_melas	9731	Chordata	Mammalia	Artiodactyla	Delphinidae	GCA_006547405.1	2.83058e+09	569.629	Pantheria	NA	NA	NA	NA	45	Pantheria	800000	Pantheria	NA	NA	3036.07	Pantheria	NA	NA	NA	515519740	18.34	6.29832	178278730
Mammalia	Tursiops_aduncus	79784	Chordata	Mammalia	Artiodactyla	Delphinidae	GCA_003227395.1	3.0364e+09	NA	NA	NA	NA	NA	NA	NA	NA	NA	NA	NA	NA	NA	NA	NA	NA	NA	1002750028	33.17	19.6414	596392138
Mammalia	Lagenorhynchus_obliquidens	90247	Chordata	Mammalia	Artiodactyla	Delphinidae	GCA_003676395.1	2.8313e+09	220.662	Pantheria	NA	NA	NA	NA	25	Pantheria	110000	Pantheria	NA	NA	3832	AnAge	NA	NA	NA	668190024	23.76	12.6004	356753645
Mammalia	Orcinus_orca	9733	Chordata	Mammalia	Artiodactyla	Delphinidae	GCA_000331955.2	2.87784e+09	866.296	Pantheria	NA	5456.75	NA	9	100	Pantheria	5630000	Pantheria	NA	NA	4396.42	Pantheria	NA	NA	NA	969526672	34.06	25.6833	739123174
Mammalia	Hippopotamus_amphibius	9833	Chordata	Mammalia	Artiodactyla	Hippopotamidae	GCA_004027065.2	3.31425e+09	NA	NA	NA	1460	4.87	585	54.5	Pantheria	1520000	Pantheria	NA	NA	1750.87	Pantheria	NA	NA	NA	NA	NA	NA	NA
Mammalia	Catagonus_wagneri	51154	Chordata	Mammalia	Artiodactyla	Tayassuidae	GCA_004024745.2	3.20117e+09	103.182	Pantheria	NA	730	9.24	4.5	9	Pantheria	35200	Pantheria	NA	NA	773.65	Pantheria	NA	NA	NA	863490980	27.09	19.3143	618283245
Mammalia	Camelus_dromedarius	9838	Chordata	Mammalia	Artiodactyla	Camelidae	GCA_000803125.3	2562360000	NA	NA	0.0825676	1738.31	0.97	11	40	Pantheria	488000	Pantheria	0.000460613	AnAge	1670.09	Pantheria	NA	NA	NA	711967108	28.06	13.9057	356314942
Mammalia	Camelus_ferus	419612	Chordata	Mammalia	Artiodactyla	Camelidae	GCA_009834535.1	2.5319e+09	NA	NA	NA	NA	NA	NA	NA	NA	NA	NA	NA	NA	NA	NA	NA	NA	NA	NA	NA	NA	NA
Mammalia	Galemys_pyrenaicus	202257	Chordata	Mammalia	Eulipotyphla	Talpidae	GCA_019455555.1	2.21873e+09	12.5	Pantheria	NA	NA	4.19	1.5	5	Pantheria	59.2	Pantheria	NA	NA	323.18	Pantheria	NA	NA	NA	434974244	19.74	11.3314	251413207
Mammalia	Scalopus_aquaticus	71119	Chordata	Mammalia	Eulipotyphla	Talpidae	GCA_004024925.1	2.50984e+09	12.544	Pantheria	NA	NA	950	1	6.2	Pantheria	86.6	Pantheria	0.0043649	AnAge	285.1	Pantheria	NA	NA	NA	578958084	23.16	18.8303	472611079
Mammalia	Talpa_occidentalis	50954	Chordata	Mammalia	Eulipotyphla	Talpidae	GCA_014898055.1	2445000000	NA	NA	NA	NA	NA	NA	NA	NA	47.3	Pantheria	NA	NA	370.28	Pantheria	NA	NA	NA	291965384	12.07	4.80951	117592552
Mammalia	Solenodon_paradoxus	79805	Chordata	Mammalia	Eulipotyphla	Solenodontidae	GCA_004363575.1	2.55947e+09	30.599	Pantheria	NA	NA	NA	2	11.3333	Pantheria	887	Pantheria	NA	NA	821.47	Pantheria	NA	NA	NA	592717012	23.25	13.6008	348109504
Mammalia	Choloepus_hoffmanni	9358	Chordata	Mammalia	Pilosa	Megalonychidae	GCA_000164785.2	3.98298e+09	NA	NA	0.126632	NA	120	NA	32.1	Pantheria	5510	Pantheria	0.000706171	AnAge	1277.49	Pantheria	NA	NA	NA	1372331688	34.83	17.8866	712418189
Mammalia	Elephas_maximus	9783	Chordata	Mammalia	Proboscidea	Elephantidae	GCA_014332765.1	3941340000	191.92	Pantheria	NA	4745	0.53	NA	80	Pantheria	3320000	Pantheria	0.000703765	AnAge	3482.73	Pantheria	NA	NA	NA	1696393032	43.41	9.95713	392444360
Mammalia	Heterohyrax_brucei	77598	Chordata	Mammalia	Hyracoidea	Procaviidae	GCA_004026845.1	4.38498e+09	46.9	Pantheria	0.273159	NA	5700	34	14	Pantheria	2450	Pantheria	0.00158041	AnAge	444.37	Pantheria	NA	NA	NA	2017661040	46.2	15.4027	675403328
Mammalia	Microgale_talazaci	176115	Chordata	Mammalia	NA	Tenrecidae	GCA_004026705.1	3.92263e+09	14.999	Pantheria	0.918987	425.83	NA	2	5.83333	Pantheria	47.4	Pantheria	0.00512658	AnAge	386.59	Pantheria	NA	NA	NA	1375726352	35.22	17.7719	697124073
Mammalia	Antechinus_stuartii	9283	Chordata	Mammalia	Dasyuromorphia	Dasyuridae	GCA_016696395.1	4.00849e+09	NA	NA	1.17205	NA	329	NA	3	Pantheria	29.7	Pantheria	0.00636364	AnAge	283.06	Pantheria	NA	NA	NA	833873272	20.94	5.40661	216723454
Mammalia	Sarcophilus_harrisii	9305	Chordata	Mammalia	Dasyuromorphia	Dasyuridae	GCA_902635505.1	2924220000	NA	NA	NA	NA	NA	NA	13	AnAge	6500	AnAge	0.00133292	AnAge	730	AnAge	NA	NA	NA	634218704	21.84	7.30456	213601524
Mammalia	Gymnobelideus_leadbeateri	38618	Chordata	Mammalia	Diprotodontia	Petauridae	GCA_011680675.1	4.20479e+09	NA	NA	0.751241	365	258	8	11	Pantheria	137	Pantheria	0.00418978	AnAge	496.28	Pantheria	NA	NA	NA	1448372596	34.67	9.24726	388828216
Mammalia	Ornithorhynchus_anatinus	9258	Chordata	Mammalia	Monotremata	Ornithorhynchidae	GCA_004115215.4	2.25617e+09	41.982	Pantheria	0.322527	730	NA	NA	22	Pantheria	1480	Pantheria	0.00130473	AnAge	646.36	Pantheria	NA	NA	NA	NA	NA	NA	NA
Aves	Acrocephalus_arundinaceus	39621	Chordata	Aves	Passeriformes	Sylviidae	GCA_013398685.1	1.43915e+09	NA	NA	NA	NA	NA	NA	10.1	AnAge	30	CRC_AvianBodyMasses	0.00856667	AnAge	365	AnAge	NA	NA	NA	294801328	20.71	15.5105	223219588
Aves	Acrocephalus_scirpaceus_scirpaceus	126889	Chordata	Aves	Passeriformes	Sylviidae	GCA_910950805.1	1.30703e+09	NA	NA	NA	NA	NA	NA	14	AnAge	12.3	CRC_AvianBodyMasses	NA	NA	365	AnAge	NA	NA	NA	177532948	13.67	9.29467	121484402
Aves	Hippolais_icterina	68497	Chordata	Aves	Passeriformes	Sylviidae	GCA_013400075.1	1261620000	NA	NA	NA	NA	NA	NA	10.8	AnAge	13.2	CRC_AvianBodyMasses	0.0190909	AnAge	365	AnAge	NA	NA	NA	249858976	19.93	12.7172	160442729
Aves	Alaudala_cheleensis	670337	Chordata	Aves	Passeriformes	Alaudidae	GCA_013398995.1	1.29994e+09	NA	NA	NA	NA	NA	NA	NA	NA	NA	NA	NA	NA	NA	NA	NA	NA	NA	175274892	13.57	8.20669	106682180
Aves	Eremophila_alpestris_peregrina	2668079	Chordata	Aves	Passeriformes	Alaudidae	GCA_009792885.1	1.26582e+09	NA	NA	NA	NA	NA	NA	8	AnAge	32.2	CRC_AvianBodyMasses	0.00972981	AnAge	365	AnAge	NA	NA	NA	161271376	12.87	8.64317	109407193
Aves	Cisticola_juncidis	52622	Chordata	Aves	Passeriformes	Cisticolidae	GCA_013400215.1	1134480000	NA	NA	NA	NA	NA	NA	NA	NA	6.85	CRC_AvianBodyMasses	NA	NA	NA	NA	NA	NA	NA	139789564	12.41	7.92619	89921037
Aves	Cyanoderma_ruficeps	181631	Chordata	Aves	Passeriformes	Timaliidae	GCA_008694505.1	1.26632e+09	NA	NA	NA	NA	NA	NA	NA	NA	NA	NA	NA	NA	NA	NA	NA	NA	NA	188339416	14.94	12.7438	161376998
Aves	Pomatorhinus_ruficollis	932028	Chordata	Aves	Passeriformes	Timaliidae	GCA_013401195.1	1.29489e+09	NA	NA	NA	NA	NA	NA	NA	NA	31.65	CRC_AvianBodyMasses	NA	NA	NA	NA	NA	NA	NA	231877888	18.03	13.4086	173625688
Aves	Donacobius_atricapilla	237420	Chordata	Aves	Passeriformes	Mimidae	GCA_013397315.1	1.28174e+09	NA	NA	NA	NA	NA	NA	NA	NA	36.8	CRC_AvianBodyMasses	NA	NA	NA	NA	NA	NA	NA	180915848	14.23	9.36396	120021762
Aves	Brachypodius_atriceps	182895	Chordata	Aves	Passeriformes	Pycnonotidae	GCA_013398615.1	1.10327e+09	NA	NA	NA	NA	NA	NA	NA	NA	NA	NA	NA	NA	NA	NA	NA	NA	NA	135668652	12.38	11.6371	128387689
Aves	Pycnonotus_jocosus	182897	Chordata	Aves	Passeriformes	Pycnonotidae	GCA_013400435.1	1.24592e+09	NA	NA	NA	NA	NA	NA	11.1	AnAge	27.4	CRC_AvianBodyMasses	0.013017	AnimalTraits	NA	NA	NA	NA	NA	216333912	17.49	12.5765	156693518
Aves	Sinosuthora_webbiana	337173	Chordata	Aves	Passeriformes	Sylviidae	GCA_013397395.1	1.27703e+09	NA	NA	NA	NA	NA	NA	NA	NA	NA	NA	NA	NA	NA	NA	NA	NA	NA	188913104	14.9	10.1686	129855728
Aves	Sterrhoptilus_dennistouni	2585820	Chordata	Aves	Passeriformes	Zosteropidae	GCA_013397095.1	1.27713e+09	NA	NA	NA	NA	NA	NA	NA	NA	NA	NA	NA	NA	NA	NA	NA	NA	NA	138997168	10.96	7.09324	90590201
Aves	Locustella_ochotensis	187437	Chordata	Aves	Passeriformes	Locustellidae	GCA_013400155.1	1.26403e+09	NA	NA	NA	NA	NA	NA	NA	NA	18.5	CRC_AvianBodyMasses	NA	NA	NA	NA	NA	NA	NA	474931672	37.82	27.9964	353883084
Aves	Cettia_cetti	68486	Chordata	Aves	Passeriformes	Sylviidae	GCA_013401135.1	1.27879e+09	NA	NA	NA	NA	NA	NA	9.3	AnAge	13.35	CRC_AvianBodyMasses	NA	NA	365	AnAge	NA	NA	NA	189840080	14.94	9.90259	126633678
Aves	Phylloscopus_trochilus_acredula	209779	Chordata	Aves	Passeriformes	Phylloscopidae	GCA_002305835.1	1.29667e+09	NA	NA	NA	NA	NA	NA	11.8	AnAge	8.7	CRC_AvianBodyMasses	0.023908	AnAge	365	AnAge	NA	NA	NA	156828224	12.2	7.34292	95213055
Aves	Erythrocercus_mccallii	107208	Chordata	Aves	Passeriformes	Dicruridae	GCA_013397435.1	1.2526e+09	NA	NA	NA	NA	NA	NA	NA	NA	7.2	CRC_AvianBodyMasses	NA	NA	NA	NA	NA	NA	NA	184951192	14.86	9.61698	120462296
Aves	Hylia_prasina	208073	Chordata	Aves	Passeriformes	Sylviidae	GCA_013397195.1	1.25129e+09	NA	NA	NA	NA	NA	NA	NA	NA	13.1	CRC_AvianBodyMasses	NA	NA	NA	NA	NA	NA	NA	218635444	17.58	13.2374	165638545
Aves	Nicator_chloris	237433	Chordata	Aves	Passeriformes	Pycnonotidae	GCA_013400495.1	1.26546e+09	NA	NA	NA	NA	NA	NA	NA	NA	46.2	CRC_AvianBodyMasses	NA	NA	NA	NA	NA	NA	NA	294458304	23.43	14.618	184985671
Aves	Agelaius_phoeniceus	39638	Chordata	Aves	Passeriformes	Icteridae	GCA_013398535.1	1271400000	NA	NA	NA	NA	NA	NA	20	AnAge	52.4	CRC_AvianBodyMasses	NA	NA	365	AnAge	NA	NA	NA	NA	NA	NA	NA
Aves	Quiscalus_mexicanus	64278	Chordata	Aves	Passeriformes	Icteridae	GCA_013399035.1	1.26626e+09	NA	NA	NA	NA	NA	NA	12.5	AnAge	169	CRC_AvianBodyMasses	NA	NA	547.5	AnAge	NA	NA	NA	201924508	16.06	10.971	138921035
Aves	Setophaga_kirtlandii	298831	Chordata	Aves	Passeriformes	Parulidae	GCA_013399655.1	1.27169e+09	NA	NA	NA	NA	NA	NA	9	AnAge	15.5	AnAge	NA	NA	365	AnAge	NA	NA	NA	467405876	37.03	25.9877	330481403
Aves	Diglossa_brunneiventris	547948	Chordata	Aves	Passeriformes	Thraupidae	GCA_019023105.1	1.31235e+09	NA	NA	NA	NA	NA	NA	NA	NA	12	CRC_AvianBodyMasses	NA	NA	NA	NA	NA	NA	NA	198901040	15.25	11.594	152153799
Aves	Passerina_amoena	142471	Chordata	Aves	Passeriformes	Fringillidae	GCA_013401095.1	1359420000	NA	NA	NA	NA	NA	NA	9.9	AnAge	15.5	CRC_AvianBodyMasses	NA	NA	365	AnAge	NA	NA	NA	NA	NA	NA	NA
Aves	Pheucticus_melanocephalus	371919	Chordata	Aves	Passeriformes	Fringillidae	GCA_013398405.1	1.27489e+09	NA	NA	NA	NA	NA	NA	25	AnAge	47.15	CRC_AvianBodyMasses	NA	NA	365	AnAge	NA	NA	NA	NA	NA	NA	NA
Aves	Melospiza_melodia	44397	Chordata	Aves	Passeriformes	Passerellidae	GCA_013398205.1	1398540000	NA	NA	NA	NA	NA	NA	11.3	AnAge	20	CRC_AvianBodyMasses	0.0125	AnAge	365	AnAge	NA	NA	NA	330461240	23.83	16.002	223794660
Aves	Zonotrichia_albicollis	44394	Chordata	Aves	Passeriformes	Passerellidae	GCA_000385455.1	1300740000	NA	NA	NA	NA	NA	NA	14.9	AnAge	24.4	CRC_AvianBodyMasses	0.0113934	AnAge	365	AnAge	NA	NA	NA	218197980	16.95	11.9063	154870430
Aves	Fringilla_coelebs_coelebs	1471794	Chordata	Aves	Passeriformes	Fringillidae	GCA_015532645.2	1.20994e+09	NA	NA	NA	NA	NA	NA	29	AnAge	21.4	CRC_AvianBodyMasses	0.0174299	AnAge	365	AnAge	NA	NA	NA	249381188	20.75	12.4105	150159638
Aves	Hemignathus_wilsoni	2518271	Chordata	Aves	Passeriformes	Fringillidae	GCA_009690805.1	1.25549e+09	NA	NA	NA	NA	NA	NA	13	AnAge	28	AnAge	NA	NA	365	AnAge	NA	NA	NA	125181524	10.05	5.9875	75172280
Aves	Loxia_curvirostra	64802	Chordata	Aves	Passeriformes	Fringillidae	GCA_013398455.1	1.25037e+09	NA	NA	NA	NA	NA	NA	16.1	AnAge	36.4	CRC_AvianBodyMasses	0.0166758	AnAge	365	AnAge	NA	NA	NA	279957340	22.58	15.8645	198365087
Aves	Loxia_leucoptera	96539	Chordata	Aves	Passeriformes	Fringillidae	GCA_013396895.1	1.24981e+09	NA	NA	NA	NA	NA	NA	4	AnAge	25.2	CRC_AvianBodyMasses	0.0186476	AnAge	NA	NA	NA	NA	NA	287623768	23.18	16.6118	207615870
Aves	Montifringilla_adamsi	356906	Chordata	Aves	Passeriformes	Passeridae	GCA_017590115.1	1.27353e+09	NA	NA	NA	NA	NA	NA	NA	NA	NA	NA	NA	NA	NA	NA	NA	NA	NA	211212492	16.78	10.0788	128356339
Aves	Pyrgilauda_ruficollis	221976	Chordata	Aves	Passeriformes	Passeridae	GCA_017590135.1	1.27181e+09	NA	NA	NA	NA	NA	NA	NA	NA	NA	NA	NA	NA	NA	NA	NA	NA	NA	163958776	13.02	8.2158	104489610
Aves	Onychostruthus_taczanowskii	356909	Chordata	Aves	Passeriformes	Passeridae	GCA_017590055.1	1.25699e+09	NA	NA	NA	NA	NA	NA	NA	NA	NA	NA	NA	NA	NA	NA	NA	NA	NA	115691364	9.31	6.25128	78577666
Aves	Passer_domesticus	48849	Chordata	Aves	Passeriformes	Passeridae	GCA_001700915.1	1535460000	NA	NA	NA	NA	NA	NA	23	AnAge	27.7	CRC_AvianBodyMasses	0.0113117	AnimalTraits	258.5	AnAge	NA	NA	NA	337793160	22.24	14.8547	228087846
Aves	Passer_montanus	9160	Chordata	Aves	Passeriformes	Passeridae	GCA_014805655.1	1.26453e+09	NA	NA	NA	NA	NA	NA	13.1	AnAge	22	CRC_AvianBodyMasses	0.00912273	AnAge	319	AnAge	NA	NA	NA	159189096	12.74	9.03964	114308855
Aves	Urocynchramus_pylzowi	571890	Chordata	Aves	Passeriformes	Fringillidae	GCA_013397555.1	1.25357e+09	NA	NA	NA	NA	NA	NA	NA	NA	NA	NA	NA	NA	NA	NA	NA	NA	NA	231999108	18.64	13.5131	169397072
Aves	Peucedramus_taeniatus	135441	Chordata	Aves	Passeriformes	Fringillidae	GCA_013400575.1	1.26158e+09	NA	NA	NA	NA	NA	NA	NA	NA	11	CRC_AvianBodyMasses	NA	NA	NA	NA	NA	NA	NA	287729024	22.97	15.7682	198928535
Aves	Ploceus_nigricollis	441696	Chordata	Aves	Passeriformes	Ploceidae	GCA_013399945.1	1.25907e+09	NA	NA	NA	NA	NA	NA	NA	NA	27.1	CRC_AvianBodyMasses	NA	NA	NA	NA	NA	NA	NA	209826420	16.78	11.7451	147878749
Aves	Dicaeum_eximium	667154	Chordata	Aves	Passeriformes	Dicaeidae	GCA_013396995.1	1.23437e+09	NA	NA	NA	NA	NA	NA	NA	NA	7.9	CRC_AvianBodyMasses	NA	NA	NA	NA	NA	NA	NA	206298396	16.83	11.8659	146468634
Aves	Certhia_americana	186443	Chordata	Aves	Passeriformes	Certhiidae	GCA_018697195.1	1173600000	NA	NA	NA	NA	NA	NA	NA	NA	8.1	CRC_AvianBodyMasses	0.0280247	AnimalTraits	365	AnAge	NA	NA	NA	127533008	10.94	6.37824	74855021
Aves	Certhia_brachydactyla	73330	Chordata	Aves	Passeriformes	Certhiidae	GCA_013400355.1	1.251e+09	NA	NA	NA	NA	NA	NA	NA	NA	8.2	CRC_AvianBodyMasses	NA	NA	365	AnAge	NA	NA	NA	161901148	13.03	8.69312	108751175
Aves	Polioptila_caerulea	66707	Chordata	Aves	Passeriformes	Certhiidae	GCA_013397295.1	1349640000	NA	NA	NA	NA	NA	NA	4.2	AnAge	5.8	CRC_AvianBodyMasses	NA	NA	319	AnAge	NA	NA	NA	184868140	13.79	9.0585	122257125
Aves	Thryothorus_ludovicianus	74200	Chordata	Aves	Passeriformes	Certhiidae	GCA_013397245.1	1.25422e+09	NA	NA	NA	NA	NA	NA	9.2	AnAge	17.2	CRC_AvianBodyMasses	NA	NA	365	AnAge	NA	NA	NA	196169264	15.76	8.92514	111940699
Aves	Sitta_europaea	50251	Chordata	Aves	Passeriformes	Sittidae	GCA_013400255.1	1.24131e+09	NA	NA	NA	NA	NA	NA	12.9	AnAge	22.6	CRC_AvianBodyMasses	NA	NA	365	AnAge	NA	NA	NA	183449876	14.88	10.2903	127734257
Aves	Cyanistes_caeruleus	156563	Chordata	Aves	Passeriformes	Paridae	GCA_002901205.1	1.44246e+09	NA	NA	NA	NA	NA	NA	14.6	AnAge	10.6	CRC_AvianBodyMasses	NA	NA	365	AnAge	NA	NA	NA	162356424	11.36	7.74195	111674906
Aves	Chloebia_gouldiae	44316	Chordata	Aves	Passeriformes	Passeridae	GCA_003676055.1	1.30183e+09	NA	NA	NA	NA	NA	NA	NA	NA	13.8	CRC_AvianBodyMasses	NA	NA	NA	NA	NA	NA	NA	NA	NA	NA	NA
Aves	Taeniopygia_guttata	59729	Chordata	Aves	Passeriformes	Estrildidae	GCA_003957565.4	1222500000	NA	NA	NA	NA	NA	NA	12	AnAge	12.05	CRC_AvianBodyMasses	0.017704	AnimalTraits	60	AnAge	NA	NA	NA	NA	NA	NA	NA
Aves	Vidua_chalybeata	81927	Chordata	Aves	Passeriformes	Estrildidae	GCA_013398495.1	1134480000	NA	NA	NA	NA	NA	NA	NA	NA	12.5	CRC_AvianBodyMasses	NA	NA	NA	NA	NA	NA	NA	92321096	8.19	5.45357	61869620
Aves	Irena_cyanogastra	175120	Chordata	Aves	Passeriformes	Irenidae	GCA_013397155.1	1.26039e+09	NA	NA	NA	NA	NA	NA	NA	NA	NA	NA	NA	NA	NA	NA	NA	NA	NA	314932444	25.17	16.1971	204146889
Aves	Leptocoma_aspasia	2585812	Chordata	Aves	Passeriformes	Nectariniidae	GCA_013399835.1	1.25943e+09	NA	NA	NA	NA	NA	NA	NA	NA	NA	NA	NA	NA	NA	NA	NA	NA	NA	194176460	15.52	10.3277	130069639
Aves	Promerops_cafer	254652	Chordata	Aves	Passeriformes	Nectariniidae	GCA_013398275.1	1.2691e+09	NA	NA	NA	NA	NA	NA	NA	NA	34.85	CRC_AvianBodyMasses	NA	NA	NA	NA	NA	NA	NA	99154796	7.89	4.66264	59173603
Aves	Anthoscopus_minutus	156561	Chordata	Aves	Passeriformes	Paridae	GCA_013399455.1	1.19056e+09	NA	NA	NA	NA	NA	NA	NA	NA	6.6	CRC_AvianBodyMasses	0.0337879	AnimalTraits	NA	NA	NA	NA	NA	368887420	31.21	23.7642	282926726
Aves	Bombycilla_garrulus	125297	Chordata	Aves	Passeriformes	Bombycillidae	GCA_013400315.1	1.25503e+09	NA	NA	NA	NA	NA	NA	13.5	AnAge	56.4	CRC_AvianBodyMasses	0.016961	AnAge	365	AnAge	NA	NA	NA	349778972	28.07	20.7527	260452606
Aves	Phainopepla_nitens	161653	Chordata	Aves	Passeriformes	Bombycillidae	GCA_013400175.1	1789740000	NA	NA	NA	NA	NA	NA	NA	NA	22.1	CRC_AvianBodyMasses	NA	NA	NA	NA	NA	NA	NA	543934820	30.61	22.2086	397476110
Aves	Catharus_fuscescens	159581	Chordata	Aves	Passeriformes	Turdidae	GCA_013398975.1	1310520000	NA	NA	NA	NA	NA	NA	10.1	AnAge	31.9	CRC_AvianBodyMasses	NA	NA	365	AnAge	NA	NA	NA	300252720	23.06	14.2495	186742313
Aves	Sialia_sialis	172413	Chordata	Aves	Passeriformes	Turdidae	GCA_009812075.1	1251840000	NA	NA	NA	NA	NA	NA	10.5	AnAge	27.5	CRC_AvianBodyMasses	NA	NA	313.5	AnAge	NA	NA	NA	310386472	24.96	16.5148	206739124
Aves	Cercotrichas_coryphoeus	614051	Chordata	Aves	Passeriformes	Muscicapidae	GCA_013398595.1	1.25228e+09	NA	NA	NA	NA	NA	NA	NA	NA	NA	NA	NA	NA	NA	NA	NA	NA	NA	284467244	22.87	13.5502	169686466
Aves	Copsychus_sechellarum	797021	Chordata	Aves	Passeriformes	Muscicapidae	GCA_013398635.1	1.27921e+09	NA	NA	NA	NA	NA	NA	NA	NA	71	CRC_AvianBodyMasses	NA	NA	NA	NA	NA	NA	NA	401878264	31.63	21.4411	274275958
Aves	Erithacus_rubecula	37610	Chordata	Aves	Passeriformes	Turdidae	GCA_903797595.2	1.32114e+09	NA	NA	NA	NA	NA	NA	19.3	AnAge	17.7	CRC_AvianBodyMasses	0.0158757	AnAge	365	AnAge	NA	NA	NA	431630764	32.88	14.73	194603225
Aves	Saxicola_maurus_maurus	1187130	Chordata	Aves	Passeriformes	Muscicapidae	GCA_900205225.1	1.24081e+09	NA	NA	NA	NA	NA	NA	NA	NA	NA	NA	NA	NA	NA	NA	NA	NA	NA	207333936	16.88	9.56169	118642170
Aves	Lamprotornis_superbus	245042	Chordata	Aves	Passeriformes	Sturnidae	GCA_015883425.1	1.298e+09	NA	NA	NA	NA	NA	NA	NA	NA	64.9	CRC_AvianBodyMasses	NA	NA	NA	NA	NA	NA	NA	NA	NA	NA	NA
Aves	Leucopsar_rothschildi	127929	Chordata	Aves	Passeriformes	Sturnidae	GCA_014363365.1	1.21577e+09	NA	NA	NA	NA	NA	NA	25	AnAge	91.3	CRC_AvianBodyMasses	NA	NA	NA	NA	NA	NA	NA	213862240	17.71	12.3843	150564835
Aves	Sturnus_vulgaris	9172	Chordata	Aves	Passeriformes	Sturnidae	GCA_001447265.1	1290960000	NA	NA	NA	NA	NA	NA	22.9	AnAge	86	CRC_AvianBodyMasses	0.0101977	AnAge	365	AnAge	NA	NA	NA	171943152	13.46	9.25028	119417425
Aves	Toxostoma_redivivum	99882	Chordata	Aves	Passeriformes	Mimidae	GCA_013397375.1	1.25546e+09	NA	NA	NA	NA	NA	NA	6.9	AnAge	84.4	CRC_AvianBodyMasses	NA	NA	228	AnAge	NA	NA	NA	171609728	13.77	8.88671	111569035
Aves	Drymodes_brunneopygia	626378	Chordata	Aves	Passeriformes	Petroicidae	GCA_013400955.1	1.28753e+09	NA	NA	NA	NA	NA	NA	NA	NA	33.15	CRC_AvianBodyMasses	NA	NA	NA	NA	NA	NA	NA	250935364	19.61	12.0728	155440613
Aves	Eopsaltria_australis	44318	Chordata	Aves	Passeriformes	Petroicidae	GCA_003426825.1	1.49253e+09	NA	NA	NA	NA	NA	NA	NA	NA	20.25	CRC_AvianBodyMasses	0.017284	AnimalTraits	NA	NA	NA	NA	NA	387669000	26.14	17.5204	261497386
Aves	Melanocharis_versteri	254552	Chordata	Aves	Passeriformes	Melanocharitidae	GCA_013397845.1	1.25312e+09	NA	NA	NA	NA	NA	NA	NA	NA	15	CRC_AvianBodyMasses	NA	NA	NA	NA	NA	NA	NA	182104128	14.64	10.5306	131961582
Aves	Callaeas_wilsoni	1347786	Chordata	Aves	Passeriformes	Callaeidae	GCA_013398955.1	1.27369e+09	NA	NA	NA	NA	NA	NA	NA	NA	NA	NA	NA	NA	NA	NA	NA	NA	NA	213185336	16.85	12.1746	155066032
Aves	Notiomystis_cincta	366454	Chordata	Aves	Passeriformes	Meliphagidae	GCA_013398075.1	1.24669e+09	NA	NA	NA	NA	NA	NA	NA	NA	93.5	CRC_AvianBodyMasses	NA	NA	NA	NA	NA	NA	NA	196778248	15.91	12.9085	160928986
Aves	Cnemophilus_loriae	254448	Chordata	Aves	Passeriformes	Corvidae	GCA_013397755.1	1.2688e+09	NA	NA	NA	NA	NA	NA	NA	NA	84.6	CRC_AvianBodyMasses	NA	NA	NA	NA	NA	NA	NA	NA	NA	NA	NA
Aves	Aleadryas_rufinucha	461220	Chordata	Aves	Passeriformes	NA	GCA_013397815.1	1.2768e+09	NA	NA	NA	NA	NA	NA	NA	NA	40.5	CRC_AvianBodyMasses	NA	NA	NA	NA	NA	NA	NA	135607216	10.7	7.19794	91903565
Aves	Oreocharis_arfaki	979223	Chordata	Aves	Passeriformes	Paramythiidae	GCA_013398015.1	1.26404e+09	NA	NA	NA	NA	NA	NA	NA	NA	19.7	CRC_AvianBodyMasses	NA	NA	NA	NA	NA	NA	NA	128338976	10.22	7.13386	90174780
Aves	Myiagra_hebetior	381031	Chordata	Aves	Passeriformes	Monarchidae	GCA_013397015.1	1.27655e+09	NA	NA	NA	NA	NA	NA	NA	NA	20.2	CRC_AvianBodyMasses	NA	NA	NA	NA	NA	NA	NA	143509040	11.32	7.62215	97300497
Aves	Rhipidura_dahli	667186	Chordata	Aves	Passeriformes	Rhipiduridae	GCA_013399225.1	1.23968e+09	NA	NA	NA	NA	NA	NA	NA	NA	9.9	CRC_AvianBodyMasses	NA	NA	NA	NA	NA	NA	NA	114672180	9.31	6.13958	76110896
Aves	Oriolus_oriolus	181099	Chordata	Aves	Passeriformes	Corvidae	GCA_013400235.1	1.2632e+09	NA	NA	NA	NA	NA	NA	14.8	AnAge	79	CRC_AvianBodyMasses	NA	NA	365	AnAge	NA	NA	NA	192749924	15.37	10.2664	129685356
Aves	Daphoenositta_chrysoptera	254528	Chordata	Aves	Passeriformes	NA	GCA_013397915.1	1.25692e+09	NA	NA	NA	NA	NA	NA	NA	NA	11.7	CRC_AvianBodyMasses	NA	NA	NA	NA	NA	NA	NA	186963880	14.97	10.2354	128651415
Aves	Edolisoma_coerulescens	2585810	Chordata	Aves	Passeriformes	Campephagidae	GCA_013397115.1	1.26753e+09	NA	NA	NA	NA	NA	NA	NA	NA	NA	NA	NA	NA	NA	NA	NA	NA	NA	130653876	10.38	7.0621	89514437
Aves	Eulacestoma_nigropectus	461239	Chordata	Aves	Passeriformes	NA	GCA_013397775.1	1.2651e+09	NA	NA	NA	NA	NA	NA	NA	NA	20	CRC_AvianBodyMasses	NA	NA	NA	NA	NA	NA	NA	166889176	13.27	9.09042	115002800
Aves	Pachycephala_philippinensis	449367	Chordata	Aves	Passeriformes	NA	GCA_013397055.1	1.26665e+09	NA	NA	NA	NA	NA	NA	NA	NA	22.3	CRC_AvianBodyMasses	NA	NA	NA	NA	NA	NA	NA	231995168	18.45	13.0083	164770571
Aves	Mohoua_ochrocephala	874463	Chordata	Aves	Passeriformes	Acanthizidae	GCA_013398855.1	1.2628e+09	NA	NA	NA	NA	NA	NA	NA	NA	27.75	CRC_AvianBodyMasses	NA	NA	NA	NA	NA	NA	NA	136620752	10.89	7.32481	92497657
Aves	Aphelocoma_coerulescens	39617	Chordata	Aves	Passeriformes	Corvidae	GCA_013398375.1	1.28981e+09	NA	NA	NA	NA	NA	NA	15	AnAge	77.15	CRC_AvianBodyMasses	NA	NA	365	AnAge	NA	NA	NA	547815580	42.94	29.8545	385067274
Aves	Coloeus_monedula	30423	Chordata	Aves	Passeriformes	Corvidae	GCA_013407035.1	1.25956e+09	NA	NA	NA	NA	NA	NA	20.3	AnAge	246	AnAge	NA	NA	730	AnAge	NA	NA	NA	NA	NA	NA	NA
Aves	Corvus_cornix_cornix	932674	Chordata	Aves	Passeriformes	Corvidae	GCA_000738735.5	1.25353e+09	NA	NA	NA	NA	NA	NA	16.8	AnAge	NA	NA	NA	NA	NA	NA	NA	NA	NA	108228096	8.73	5.45779	68415240
Aves	Corvus_hawaiiensis	134902	Chordata	Aves	Passeriformes	Corvidae	GCA_003402825.1	1.29479e+09	NA	NA	NA	NA	NA	NA	25	AnAge	520	CRC_AvianBodyMasses	NA	NA	1095	AnAge	NA	NA	NA	NA	NA	NA	NA
Aves	Corvus_macrorhynchos	36249	Chordata	Aves	Passeriformes	Corvidae	GCA_014363025.1	1.23847e+09	NA	NA	NA	NA	NA	NA	NA	NA	482.25	CRC_AvianBodyMasses	NA	NA	NA	NA	NA	NA	NA	185963640	15.12	9.10645	112780617
Aves	Dicrurus_megarhynchus	450177	Chordata	Aves	Passeriformes	Dicruridae	GCA_013399195.1	1.27851e+09	NA	NA	NA	NA	NA	NA	NA	NA	130	CRC_AvianBodyMasses	NA	NA	NA	NA	NA	NA	NA	139521688	10.99	7.63388	97600136
Aves	Struthidea_cinerea	181839	Chordata	Aves	Passeriformes	Corcoracidae	GCA_013397865.1	1.26713e+09	NA	NA	NA	NA	NA	NA	25	AnAge	132	CRC_AvianBodyMasses	NA	NA	NA	NA	NA	NA	NA	249391892	19.82	15.5186	196641806
Aves	Chaetorhynchus_papuensis	254446	Chordata	Aves	Passeriformes	Rhipiduridae	GCA_013396525.1	1.27077e+09	NA	NA	NA	NA	NA	NA	NA	NA	37.5	CRC_AvianBodyMasses	NA	NA	NA	NA	NA	NA	NA	158981440	12.59	7.80853	99228379
Aves	Lanius_collurio	56324	Chordata	Aves	Passeriformes	Laniidae	GCA_020086605.1	1183380000	NA	NA	NA	NA	NA	NA	10.1	AnAge	28.45	CRC_AvianBodyMasses	0.0134622	AnAge	365	AnAge	NA	NA	NA	125736428	10.69	6.49431	76852372
Aves	Lanius_ludovicianus	28713	Chordata	Aves	Passeriformes	Laniidae	GCA_013397235.1	1.26503e+09	NA	NA	NA	NA	NA	NA	12.5	AnAge	47.7	CRC_AvianBodyMasses	NA	NA	365	AnAge	NA	NA	NA	173958376	13.84	8.98704	113688543
Aves	Cicinnurus_regius	36263	Chordata	Aves	Passeriformes	Paradisaeidae	GCA_003713305.1	1.28822e+09	NA	NA	NA	NA	NA	NA	NA	NA	51	CRC_AvianBodyMasses	NA	NA	NA	NA	NA	NA	NA	142649852	11.14	7.14497	92042875
Aves	Diphyllodes_magnificus	28716	Chordata	Aves	Passeriformes	Paradisaeidae	GCA_003713285.1	1.29601e+09	NA	NA	NA	NA	NA	NA	NA	NA	NA	NA	NA	NA	NA	NA	NA	NA	NA	130169952	10.11	6.43168	83355396
Aves	Paradisaea_raggiana	36268	Chordata	Aves	Passeriformes	Paradisaeidae	GCA_003713265.1	1.26155e+09	NA	NA	NA	NA	NA	NA	NA	NA	220.5	CRC_AvianBodyMasses	NA	NA	NA	NA	NA	NA	NA	152245352	12.14	7.37663	93060120
Aves	Paradisaea_rubra	39963	Chordata	Aves	Passeriformes	Paradisaeidae	GCA_003713215.1	1.30241e+09	NA	NA	NA	NA	NA	NA	NA	NA	179.5	CRC_AvianBodyMasses	NA	NA	NA	NA	NA	NA	NA	136839400	10.57	7.16624	93333550
Aves	Parotia_lawesii	39961	Chordata	Aves	Passeriformes	Paradisaeidae	GCA_003713295.1	1.28505e+09	NA	NA	NA	NA	NA	NA	NA	NA	155.5	CRC_AvianBodyMasses	NA	NA	NA	NA	NA	NA	NA	129955440	10.18	5.94113	76346543
Aves	Ifrita_kowaldi	461245	Chordata	Aves	Passeriformes	Cinclosomatidae	GCA_013398055.1	1.26638e+09	NA	NA	NA	NA	NA	NA	NA	NA	32.1	CRC_AvianBodyMasses	NA	NA	NA	NA	NA	NA	NA	141681524	11.27	7.63356	96670307
Aves	Falcunculus_frontatus	254539	Chordata	Aves	Passeriformes	NA	GCA_013398115.1	1.26782e+09	NA	NA	NA	NA	NA	NA	NA	NA	28.05	CRC_AvianBodyMasses	NA	NA	NA	NA	NA	NA	NA	132001432	10.48	6.70645	85025699
Aves	Gymnorhina_tibicen	9132	Chordata	Aves	Passeriformes	Artamidae	GCA_013399875.1	1.27941e+09	NA	NA	NA	NA	NA	NA	NA	NA	256	CRC_AvianBodyMasses	NA	NA	NA	NA	NA	NA	NA	171682820	13.51	9.41353	120437684
Aves	Rhagologus_leucostigma	156170	Chordata	Aves	Passeriformes	NA	GCA_013397725.1	1.27086e+09	NA	NA	NA	NA	NA	NA	NA	NA	26.8	CRC_AvianBodyMasses	NA	NA	NA	NA	NA	NA	NA	142124276	11.26	6.58254	83654581
Aves	Machaerirhynchus_nigripectus	1160894	Chordata	Aves	Passeriformes	Dicruridae	GCA_013397975.1	1.27006e+09	NA	NA	NA	NA	NA	NA	NA	NA	12	CRC_AvianBodyMasses	NA	NA	NA	NA	NA	NA	NA	138259020	10.96	6.8015	86383124
Aves	Platysteira_castanea	1160851	Chordata	Aves	Passeriformes	NA	GCA_013397175.1	1.28743e+09	NA	NA	NA	NA	NA	NA	NA	NA	14.1	CRC_AvianBodyMasses	NA	NA	NA	NA	NA	NA	NA	204490988	16	10.4707	134803009
Aves	Vireo_altiloquus	34956	Chordata	Aves	Passeriformes	Vireonidae	GCA_013396875.1	1.2948e+09	NA	NA	NA	NA	NA	NA	NA	NA	17.9	CRC_AvianBodyMasses	NA	NA	NA	NA	NA	NA	NA	200541188	15.6	9.20456	119180690
Aves	Ptilorrhoa_leucosticta	449384	Chordata	Aves	Passeriformes	Cinclosomatidae	GCA_013396485.1	1.34997e+09	NA	NA	NA	NA	NA	NA	NA	NA	49.2	CRC_AvianBodyMasses	NA	NA	NA	NA	NA	NA	NA	209916120	15.65	9.56979	129189264
Aves	Orthonyx_spaldingii	38397	Chordata	Aves	Passeriformes	Orthonychidae	GCA_013397795.1	1.25811e+09	NA	NA	NA	NA	NA	NA	NA	NA	161	CRC_AvianBodyMasses	NA	NA	NA	NA	NA	NA	NA	201588100	16.13	11.3999	143423589
Aves	Dasyornis_broadbenti	243059	Chordata	Aves	Passeriformes	Dasyornithidae	GCA_013397935.1	1.24617e+09	NA	NA	NA	NA	NA	NA	NA	NA	67.9	CRC_AvianBodyMasses	NA	NA	NA	NA	NA	NA	NA	164359196	13.28	10.0594	125356934
Aves	Grantiella_picta	266360	Chordata	Aves	Passeriformes	Meliphagidae	GCA_013397955.1	1.23373e+09	NA	NA	NA	NA	NA	NA	NA	NA	21.5	CRC_AvianBodyMasses	NA	NA	NA	NA	NA	NA	NA	243158000	19.86	18.3209	226030526
Aves	Lichenostomus_cassidix	1497555	Chordata	Aves	Passeriformes	Meliphagidae	GCA_008360975.1	1.33998e+09	NA	NA	NA	NA	NA	NA	NA	NA	NA	NA	NA	NA	NA	NA	NA	NA	NA	NA	NA	NA	NA
Aves	Origma_solitaria	720586	Chordata	Aves	Passeriformes	Acanthizidae	GCA_013397895.1	1.25659e+09	NA	NA	NA	NA	NA	NA	NA	NA	14.35	CRC_AvianBodyMasses	NA	NA	NA	NA	NA	NA	NA	227875976	18.27	13.8612	174178931
Aves	Pardalotus_punctatus	254575	Chordata	Aves	Passeriformes	Pardalotidae	GCA_013400915.1	1.25542e+09	NA	NA	NA	NA	NA	NA	NA	NA	8.7	CRC_AvianBodyMasses	0.0252874	AnimalTraits	NA	NA	NA	NA	NA	192322872	15.43	11.7242	147187902
Aves	Malurus_cyaneus_samueli	2593467	Chordata	Aves	Passeriformes	Maluridae	GCA_009741485.1	1.31164e+09	NA	NA	NA	NA	NA	NA	10.4	AnAge	10.4	AnAge	0.0169872	AnimalTraits	365	AnAge	NA	NA	NA	226653712	17.45	14.2624	187071679
Aves	Malurus_elegans	720584	Chordata	Aves	Passeriformes	Maluridae	GCA_013397995.1	1.23262e+09	NA	NA	NA	NA	NA	NA	NA	NA	9.6	CRC_AvianBodyMasses	NA	NA	NA	NA	NA	NA	NA	206717136	16.88	12.4694	153699947
Aves	Climacteris_rufus	47695	Chordata	Aves	Passeriformes	Climacteridae	GCA_013398175.1	1.28753e+09	NA	NA	NA	NA	NA	NA	NA	NA	NA	NA	NA	NA	NA	NA	NA	NA	NA	208781288	16.33	11.3641	146316304
Aves	Ptilonorhynchus_violaceus	28724	Chordata	Aves	Passeriformes	Ptilonorhynchidae	GCA_013397565.1	1.28617e+09	NA	NA	NA	NA	NA	NA	NA	NA	219	CRC_AvianBodyMasses	NA	NA	NA	NA	NA	NA	NA	204890308	16.04	8.45831	108788418
Aves	Atrichornis_clamosus	449594	Chordata	Aves	Passeriformes	Menuridae	GCA_013400975.1	1.27365e+09	NA	NA	NA	NA	NA	NA	NA	NA	43.05	CRC_AvianBodyMasses	NA	NA	NA	NA	NA	NA	NA	286803216	22.67	17.3257	220669034
Aves	Menura_novaehollandiae	47692	Chordata	Aves	Passeriformes	Menuridae	GCA_013396355.1	1.28936e+09	NA	NA	NA	NA	NA	NA	NA	NA	980	CRC_AvianBodyMasses	NA	NA	NA	NA	NA	NA	NA	259749044	20.28	11.4595	147753797
Aves	Campylorhamphus_procurvoides	190295	Chordata	Aves	Passeriformes	Dendrocolaptidae	GCA_013396655.1	1.27365e+09	NA	NA	NA	NA	NA	NA	NA	NA	33.5	CRC_AvianBodyMasses	NA	NA	NA	NA	NA	NA	NA	159343776	12.6	7.95415	101307650
Aves	Xiphorhynchus_elegans	269412	Chordata	Aves	Passeriformes	Dendrocolaptidae	GCA_013401175.1	1.28836e+09	NA	NA	NA	NA	NA	NA	NA	NA	34.1	CRC_AvianBodyMasses	NA	NA	NA	NA	NA	NA	NA	153817100	12.01	6.07961	78327440
Aves	Sclerurus_mexicanus	265632	Chordata	Aves	Passeriformes	Furnariidae	GCA_013396755.1	1242060000	NA	NA	NA	NA	NA	NA	NA	NA	25.1	CRC_AvianBodyMasses	NA	NA	NA	NA	NA	NA	NA	171382644	13.9	9.44769	117345988
Aves	Scytalopus_superciliaris	312124	Chordata	Aves	Passeriformes	Rhinocryptidae	GCA_013400415.1	1.29093e+09	NA	NA	NA	NA	NA	NA	NA	NA	17.8	CRC_AvianBodyMasses	NA	NA	NA	NA	NA	NA	NA	171866552	13.41	9.28078	119807951
Aves	Grallaria_varia	117165	Chordata	Aves	Passeriformes	Formicariidae	GCA_013396735.1	1.28398e+09	NA	NA	NA	NA	NA	NA	NA	NA	119	CRC_AvianBodyMasses	NA	NA	NA	NA	NA	NA	NA	286139768	22.45	14.8044	190085068
Aves	Formicarius_rufipectus	1118560	Chordata	Aves	Passeriformes	Formicariidae	GCA_013399695.1	1.26974e+09	NA	NA	NA	NA	NA	NA	NA	NA	74.4	CRC_AvianBodyMasses	NA	NA	NA	NA	NA	NA	NA	280764288	22.27	16.2673	206553583
Aves	Sakesphorus_luctuosus	419690	Chordata	Aves	Passeriformes	Thamnophilidae	GCA_013396695.1	1.31317e+09	NA	NA	NA	NA	NA	NA	NA	NA	31.4	CRC_AvianBodyMasses	NA	NA	NA	NA	NA	NA	NA	316335968	24.27	16.4993	216662422
Aves	Corapipo_altera	415028	Chordata	Aves	Passeriformes	Pipridae	GCA_003945725.1	1.33204e+09	NA	NA	NA	NA	NA	NA	NA	NA	11.8	CRC_AvianBodyMasses	NA	NA	NA	NA	NA	NA	NA	NA	NA	NA	NA
Aves	Neopelma_chrysocephalum	114329	Chordata	Aves	Passeriformes	Pipridae	GCA_003984885.2	1.38899e+09	NA	NA	NA	NA	NA	NA	NA	NA	15.5	CRC_AvianBodyMasses	NA	NA	NA	NA	NA	NA	NA	NA	NA	NA	NA
Aves	Pipra_filicauda	649802	Chordata	Aves	Passeriformes	Pipridae	GCA_003945595.2	1.31534e+09	NA	NA	NA	NA	NA	NA	NA	NA	15.4	CRC_AvianBodyMasses	NA	NA	NA	NA	NA	NA	NA	124874556	9.56	7.34903	96664336
Aves	Lepidothrix_coronata	321398	Chordata	Aves	Passeriformes	Pipridae	GCA_001604755.1	1163820000	NA	NA	NA	NA	NA	NA	NA	NA	NA	NA	NA	NA	NA	NA	NA	NA	NA	104706460	9.08	5.40798	62939173
Aves	Manacus_vitellinus	328815	Chordata	Aves	Passeriformes	Pipridae	GCA_001715985.3	1.3037e+09	NA	NA	NA	NA	NA	NA	NA	NA	18.2	CRC_AvianBodyMasses	0.0143644	AnimalTraits	NA	NA	NA	NA	NA	67662692	5.24	2.49801	32566490
Aves	Piprites_chloris	114369	Chordata	Aves	Passeriformes	Pipridae	GCA_013399295.1	1193160000	NA	NA	NA	NA	NA	NA	NA	NA	16	CRC_AvianBodyMasses	NA	NA	NA	NA	NA	NA	NA	144274312	12.17	7.46361	89052836
Aves	Onychorhynchus_coronatus	360224	Chordata	Aves	Passeriformes	Tyrannidae	GCA_013397825.1	1114920000	NA	NA	NA	NA	NA	NA	NA	NA	14	CRC_AvianBodyMasses	NA	NA	NA	NA	NA	NA	NA	158864292	14.35	8.6346	96268917
Aves	Pachyramphus_minor	369605	Chordata	Aves	Passeriformes	Tyrannidae	GCA_013397135.1	1.2826e+09	NA	NA	NA	NA	NA	NA	NA	NA	36.6	CRC_AvianBodyMasses	NA	NA	NA	NA	NA	NA	NA	205567604	16.14	11.6521	149449339
Aves	Mionectes_macconnelli	254557	Chordata	Aves	Passeriformes	Tyrannidae	GCA_013397495.1	1183380000	NA	NA	NA	NA	NA	NA	NA	NA	13.5	CRC_AvianBodyMasses	NA	NA	NA	NA	NA	NA	NA	186532016	15.87	10.2956	121836646
Aves	Tyrannus_savana	137541	Chordata	Aves	Passeriformes	Tyrannidae	GCA_013399735.1	1.28333e+09	NA	NA	NA	NA	NA	NA	NA	NA	31.9	CRC_AvianBodyMasses	NA	NA	NA	NA	NA	NA	NA	168521500	13.23	8.46214	108597180
Aves	Tachuris_rubrigastra	495162	Chordata	Aves	Passeriformes	Tyrannidae	GCA_013396555.1	1.28839e+09	NA	NA	NA	NA	NA	NA	NA	NA	7.8	CRC_AvianBodyMasses	NA	NA	NA	NA	NA	NA	NA	254740736	19.9	13.3782	172363666
Aves	Oxyruncus_cristatus	114331	Chordata	Aves	Passeriformes	Cotingidae	GCA_013399855.1	1.29176e+09	NA	NA	NA	NA	NA	NA	NA	NA	42	CRC_AvianBodyMasses	NA	NA	NA	NA	NA	NA	NA	177090528	13.81	9.28705	119966606
Aves	Sapayoa_aenigma	239371	Chordata	Aves	Passeriformes	Tyrannidae	GCA_013398745.1	1.23541e+09	NA	NA	NA	NA	NA	NA	NA	NA	20.8	CRC_AvianBodyMasses	NA	NA	NA	NA	NA	NA	NA	231809960	18.89	12.2875	151801858
Aves	Smithornis_capensis	363769	Chordata	Aves	Passeriformes	Eurylaimidae	GCA_013396465.1	1.29037e+09	NA	NA	NA	NA	NA	NA	NA	NA	23.2	CRC_AvianBodyMasses	NA	NA	NA	NA	NA	NA	NA	280542672	21.89	11.5632	149208135
Aves	Serilophus_lunatus	239386	Chordata	Aves	Passeriformes	Eurylaimidae	GCA_013399895.1	1.26502e+09	NA	NA	NA	NA	NA	NA	NA	NA	34	CRC_AvianBodyMasses	NA	NA	NA	NA	NA	NA	NA	225609400	17.96	13.9627	176630869
Aves	Urocolius_indicus	458196	Chordata	Aves	Coliiformes	Coliidae	GCA_013401255.1	1496340000	NA	NA	NA	NA	NA	NA	NA	NA	52.7	CRC_AvianBodyMasses	NA	NA	NA	NA	NA	NA	NA	354735060	23.87	15.936	238457028
Aves	Bucco_capensis	135168	Chordata	Aves	Galbuliformes	Bucconidae	GCA_013396975.1	1.20178e+09	NA	NA	NA	NA	NA	NA	NA	NA	54	CRC_AvianBodyMasses	NA	NA	NA	NA	NA	NA	NA	269761328	22.61	14.3555	172520755
Aves	Galbula_dea	1109041	Chordata	Aves	Galbuliformes	Galbulidae	GCA_013399015.1	1.22424e+09	NA	NA	NA	NA	NA	NA	NA	NA	27.4	CRC_AvianBodyMasses	NA	NA	NA	NA	NA	NA	NA	187925528	15.46	9.02736	110516750
Aves	Colaptes_auratus	51355	Chordata	Aves	Piciformes	Picidae	GCA_015227895.1	1.67389e+09	NA	NA	NA	NA	NA	NA	12.5	AnAge	142	CRC_AvianBodyMasses	NA	NA	365	AnAge	NA	NA	NA	335134336	20.15	9.76637	163477867
Aves	Melanerpes_aurifrons	371916	Chordata	Aves	Piciformes	Picidae	GCA_011125475.1	1.59091e+09	NA	NA	NA	NA	NA	NA	NA	NA	80.9	CRC_AvianBodyMasses	NA	NA	365	AnAge	NA	NA	NA	424246044	26.85	13.6912	217813283
Aves	Indicator_maculatus	545262	Chordata	Aves	Piciformes	Indicatoridae	GCA_013399975.1	1.37053e+09	NA	NA	NA	NA	NA	NA	NA	NA	46.8	CRC_AvianBodyMasses	NA	NA	NA	NA	NA	NA	NA	492996144	36.21	25.2107	345520663
Aves	Tricholaema_leucomelas	240729	Chordata	Aves	Piciformes	Lybiidae	GCA_013400475.1	1545240000	NA	NA	NA	NA	NA	NA	NA	NA	32.2	CRC_AvianBodyMasses	NA	NA	NA	NA	NA	NA	NA	534722896	34.84	17.8293	275506078
Aves	Alopecoenas_beccarii	262131	Chordata	Aves	Columbiformes	Columbidae	GCA_013399365.1	1.35608e+09	NA	NA	NA	NA	NA	NA	NA	NA	NA	NA	NA	NA	NA	NA	NA	NA	NA	342268848	25.41	19.3145	261919760
Aves	Caloenas_nicobarica	187106	Chordata	Aves	Columbiformes	Columbidae	GCA_013398195.1	1506120000	NA	NA	NA	NA	NA	NA	20.5	AnAge	540	CRC_AvianBodyMasses	NA	NA	NA	NA	NA	NA	NA	171503540	11.46	7.62154	114789606
Aves	Columba_janthina_nitens	985682	Chordata	Aves	Columbiformes	Columbidae	GCA_014362705.1	1.31738e+09	NA	NA	NA	NA	NA	NA	NA	NA	397	CRC_AvianBodyMasses	NA	NA	NA	NA	NA	NA	NA	244293912	18.67	11.4148	150375851
Aves	Streptopelia_turtur	177155	Chordata	Aves	Columbiformes	Columbidae	GCA_901699155.2	1202940000	NA	NA	NA	NA	NA	NA	13.2	AnAge	132	CRC_AvianBodyMasses	0.00862121	AnAge	365	AnAge	NA	NA	NA	263149108	22.02	19.8904	239269539
Aves	Trogon_melanurus	56311	Chordata	Aves	Trogoniformes	Trogonidae	GCA_013399275.1	1.3467e+09	NA	NA	NA	NA	NA	NA	NA	NA	114	CRC_AvianBodyMasses	NA	NA	NA	NA	NA	NA	NA	249825228	18.67	11.6539	156943548
Aves	Calypte_anna	9244	Chordata	Aves	Apodiformes	Trochilidae	GCA_003957555.2	1114920000	NA	NA	NA	NA	NA	NA	8.5	AnAge	4.25	CRC_AvianBodyMasses	0.0276471	AnAge	365	AnAge	NA	NA	NA	104507740	9.44	5.60181	62455681
Aves	Hemiprocne_comata	243314	Chordata	Aves	Apodiformes	Apodidae	GCA_013396855.1	1.38705e+09	NA	NA	NA	NA	NA	NA	NA	NA	18.2	CRC_AvianBodyMasses	NA	NA	NA	NA	NA	NA	NA	230548120	16.74	11.9558	165833057
Aves	Centropus_unirufus	1118519	Chordata	Aves	Cuculiformes	Centropidae	GCA_013397695.1	1.27527e+09	NA	NA	NA	NA	NA	NA	NA	NA	184.5	CRC_AvianBodyMasses	NA	NA	NA	NA	NA	NA	NA	NA	NA	NA	NA
Aves	Crotophaga_sulcirostris	33598	Chordata	Aves	Cuculiformes	Crotophagidae	GCA_013397455.1	1300740000	NA	NA	NA	NA	NA	NA	NA	NA	82.2	CRC_AvianBodyMasses	NA	NA	NA	NA	NA	NA	NA	177046796	13.7	7.7324	100578369
Aves	Oceanodroma_tethys	79633	Chordata	Aves	Procellariiformes	NA	GCA_013397025.1	1.44492e+09	NA	NA	NA	NA	NA	NA	NA	NA	22.6	CRC_AvianBodyMasses	NA	NA	NA	NA	NA	NA	NA	220304964	15.34	11.4101	164866068
Aves	Amazona_guildingii	175529	Chordata	Aves	Psittaciformes	Psittacidae	GCA_013399615.1	1.37782e+09	NA	NA	NA	NA	NA	NA	28	AnAge	646	CRC_AvianBodyMasses	NA	NA	NA	NA	NA	NA	NA	183306740	13.4	9.60795	132380286
Aves	Myiopsitta_monachus	176066	Chordata	Aves	Psittaciformes	Psittacidae	GCA_017639245.1	1.4202e+09	NA	NA	NA	NA	NA	NA	22.1	AnAge	120	CRC_AvianBodyMasses	0.00432417	AnAge	730	AnAge	NA	NA	NA	224971064	15.95	10.6036	150592472
Aves	Ara_ararauna	9226	Chordata	Aves	Psittaciformes	Psittacidae	GCA_010014805.1	1418100000	NA	NA	NA	NA	NA	NA	43	AnAge	1125	CRC_AvianBodyMasses	NA	NA	NA	NA	NA	NA	NA	262049980	18.61	12.8268	181897418
Aves	Ara_glaucogularis	303304	Chordata	Aves	Psittaciformes	Psittacidae	GCA_013433245.1	1.38524e+09	NA	NA	NA	NA	NA	NA	22	AnAge	784	CRC_AvianBodyMasses	NA	NA	NA	NA	NA	NA	NA	214188300	15.56	10.0669	139450867
Aves	Aratinga_weddellii	190661	Chordata	Aves	Psittaciformes	Psittacidae	GCA_009867205.1	1.3542e+09	NA	NA	NA	NA	NA	NA	NA	NA	108	CRC_AvianBodyMasses	NA	NA	NA	NA	NA	NA	NA	179279628	13.33	9.12932	123629115
Aves	Eupsittula_pertinax	492513	Chordata	Aves	Psittaciformes	Psittacidae	GCA_011317185.1	1.42391e+09	NA	NA	NA	NA	NA	NA	NA	NA	NA	NA	NA	NA	NA	NA	NA	NA	NA	230238328	16.28	11.5523	164494886
Aves	Guaruba_guarouba	51906	Chordata	Aves	Psittaciformes	Psittacidae	GCA_011800095.1	1.39958e+09	NA	NA	NA	NA	NA	NA	23.2	AnAge	250	AnAge	NA	NA	NA	NA	NA	NA	NA	237110040	17.06	11.603	162393700
Aves	Pyrrhura_cruentata	311901	Chordata	Aves	Psittaciformes	Psittacidae	GCA_016545565.1	1.36823e+09	NA	NA	NA	NA	NA	NA	NA	NA	NA	NA	NA	NA	NA	NA	NA	NA	NA	198305780	14.59	10.1316	138622822
Aves	Pyrrhura_frontalis	211511	Chordata	Aves	Psittaciformes	Psittacidae	GCA_010014865.1	1.35271e+09	NA	NA	NA	NA	NA	NA	NA	NA	80.125	CRC_AvianBodyMasses	NA	NA	NA	NA	NA	NA	NA	239985144	17.86	13.218	178800254
Aves	Pyrrhura_molinae	311895	Chordata	Aves	Psittaciformes	Psittacidae	GCA_011763355.1	1330080000	NA	NA	NA	NA	NA	NA	NA	NA	77.1	CRC_AvianBodyMasses	NA	NA	NA	NA	NA	NA	NA	180564504	13.66	9.31399	123883567
Aves	Pyrrhura_perlata	311897	Chordata	Aves	Psittaciformes	Psittacidae	GCA_011763455.1	1.35107e+09	NA	NA	NA	NA	NA	NA	14.3	AnAge	75	CRC_AvianBodyMasses	NA	NA	NA	NA	NA	NA	NA	176977308	13.19	9.06438	122465778
Aves	Psittacus_erithacus	57247	Chordata	Aves	Psittaciformes	Psittacidae	GCA_009867235.1	1261620000	NA	NA	NA	NA	NA	NA	49.7	AnAge	333	CRC_AvianBodyMasses	NA	NA	NA	NA	NA	NA	NA	168555580	13.45	9.07122	114444273
Aves	Psittacus_timneh	1549196	Chordata	Aves	Psittaciformes	Psittacidae	GCA_009867315.1	1.34194e+09	NA	NA	NA	NA	NA	NA	NA	NA	NA	NA	NA	NA	NA	NA	NA	NA	NA	202777856	15.21	11.2898	151502285
Aves	Rhinopomastus_cyanomelas	113115	Chordata	Aves	Upupiformes	Rhinopomastidae	GCA_013400115.1	1105140000	NA	NA	NA	NA	NA	NA	NA	NA	28	CRC_AvianBodyMasses	NA	NA	NA	NA	NA	NA	NA	252407660	23	9.93708	109818629
Aves	Caprimulgus_europaeus	111811	Chordata	Aves	Caprimulgiformes	Caprimulgidae	GCA_907165065.1	1.43134e+09	NA	NA	NA	NA	NA	NA	11.9	AnAge	67	CRC_AvianBodyMasses	NA	NA	365	AnAge	NA	NA	NA	154474180	10.86	7.30198	104516266
Aves	Podargus_strigoides	8905	Chordata	Aves	Caprimulgiformes	Podargidae	GCA_013399755.1	1.38367e+09	NA	NA	NA	NA	NA	NA	NA	NA	278	CRC_AvianBodyMasses	NA	NA	NA	NA	NA	NA	NA	205213304	14.93	10.8618	150291916
Aves	Corythaixoides_concolor	103956	Chordata	Aves	Musophagiformes	Musophagidae	GCA_013399495.1	1.44337e+09	NA	NA	NA	NA	NA	NA	NA	NA	258	CRC_AvianBodyMasses	NA	NA	NA	NA	NA	NA	NA	267842612	18.68	10.5152	151773438
Aves	Bubo_blakistoni	1564486	Chordata	Aves	Strigiformes	Strigidae	GCA_004320225.1	1.45079e+09	NA	NA	NA	NA	NA	NA	NA	NA	NA	NA	NA	NA	NA	NA	NA	NA	NA	283813752	19.69	15.0488	218326477
Aves	Bubo_scandiacus	371907	Chordata	Aves	Strigiformes	Strigidae	GCA_017315185.1	1.52103e+09	NA	NA	NA	NA	NA	NA	28	AnAge	2042.5	CRC_AvianBodyMasses	0.00206825	AnAge	730	AnAge	NA	NA	NA	221712776	14.67	10.7923	164155313
Aves	Bubo_bubo	30461	Chordata	Aves	Strigiformes	Strigidae	GCA_010303855.1	1985340000	NA	NA	NA	NA	NA	NA	68	AnAge	2686	CRC_AvianBodyMasses	NA	NA	730	AnAge	NA	NA	NA	472525600	24.06	18.4337	365972304
Aves	Ciccaba_nigrolineata	1118524	Chordata	Aves	Strigiformes	Strigidae	GCA_013396715.1	1.4438e+09	NA	NA	NA	NA	NA	NA	NA	NA	458.5	CRC_AvianBodyMasses	NA	NA	NA	NA	NA	NA	NA	245021624	17.09	12.7925	184697989
Aves	Otus_sunia	257818	Chordata	Aves	Strigiformes	Strigidae	GCA_010365825.1	1.49627e+09	NA	NA	NA	NA	NA	NA	NA	NA	72.1	CRC_AvianBodyMasses	NA	NA	NA	NA	NA	NA	NA	222116288	15	10.65	159352419
Aves	Strix_occidentalis_caurina	311401	Chordata	Aves	Strigiformes	Strigidae	GCA_002372975.2	1.52415e+09	NA	NA	NA	NA	NA	NA	25	AnAge	606	CRC_AvianBodyMasses	0.00441419	AnAge	365	AnAge	NA	NA	NA	170768972	11.28	7.51696	114569706
Aves	Glaucidium_brasilianum	78217	Chordata	Aves	Strigiformes	Strigidae	GCA_013399595.1	1.42208e+09	NA	NA	NA	NA	NA	NA	NA	NA	70.75	CRC_AvianBodyMasses	NA	NA	NA	NA	NA	NA	NA	231058960	16.36	11.2894	160545052
Aves	Aramus_guarauna	54356	Chordata	Aves	Gruiformes	Aramidae	GCA_013400195.1	1.42253e+09	NA	NA	NA	NA	NA	NA	NA	NA	1080	CRC_AvianBodyMasses	NA	NA	NA	NA	NA	NA	NA	224651008	15.9	12.2673	174505747
Aves	Grus_nigricollis	40817	Chordata	Aves	Gruiformes	Gruidae	GCA_004360235.1	1564800000	NA	NA	NA	NA	NA	NA	NA	NA	6000	CRC_AvianBodyMasses	NA	NA	NA	NA	NA	NA	NA	202761868	13.04	9.33606	146090730
Aves	Heliornis_fulica	54369	Chordata	Aves	Gruiformes	Heliornithidae	GCA_013399135.1	1.33366e+09	NA	NA	NA	NA	NA	NA	NA	NA	132	CRC_AvianBodyMasses	NA	NA	NA	NA	NA	NA	NA	272715656	20.6	12.9391	172563383
Aves	Calonectris_borealis	1323832	Chordata	Aves	Procellariiformes	Procellariidae	GCA_013401115.1	1.41715e+09	NA	NA	NA	NA	NA	NA	NA	NA	NA	NA	NA	NA	NA	NA	NA	NA	NA	143839884	10.21	6.35396	90045430
Aves	Pelecanoides_urinatrix	37079	Chordata	Aves	Procellariiformes	Pelecanoididae	GCA_013400755.1	1.46485e+09	NA	NA	NA	NA	NA	NA	NA	NA	141	CRC_AvianBodyMasses	NA	NA	NA	NA	NA	NA	NA	271935536	18.68	11.9338	174813322
Aves	Phalacrocorax_auritus	56069	Chordata	Aves	Pelecaniformes	Phalacrocoracidae	GCA_002173455.1	1398540000	NA	NA	NA	NA	NA	NA	22.5	AnAge	1674	CRC_AvianBodyMasses	0.00335102	AnAge	730	AnAge	NA	NA	NA	244984320	17.64	12.2843	171800750
Aves	Phalacrocorax_harrisi	473964	Chordata	Aves	Pelecaniformes	Phalacrocoracidae	GCA_002173475.1	1.46185e+09	NA	NA	NA	NA	NA	NA	NA	NA	3050	CRC_AvianBodyMasses	NA	NA	NA	NA	NA	NA	NA	196934136	13.61	8.09155	118286095
Aves	Phalacrocorax_pelagicus	2723871	Chordata	Aves	Pelecaniformes	Phalacrocoracidae	GCA_002173435.1	1.47113e+09	NA	NA	NA	NA	NA	NA	17.8	AnAge	1856.5	CRC_AvianBodyMasses	NA	NA	730	AnAge	NA	NA	NA	166972400	11.47	6.26705	92196345
Aves	Aegotheles_bennettii	48278	Chordata	Aves	Caprimulgiformes	Aegothelidae	GCA_013398125.1	1.32402e+09	NA	NA	NA	NA	NA	NA	NA	NA	53.625	CRC_AvianBodyMasses	NA	NA	NA	NA	NA	NA	NA	174991668	13.32	8.87878	117556853
Aves	Ardeotis_kori	89386	Chordata	Aves	Gruiformes	Otididae	GCA_013396375.1	1388760000	NA	NA	NA	NA	NA	NA	NA	NA	8460	CRC_AvianBodyMasses	NA	NA	NA	NA	NA	NA	NA	NA	NA	NA	NA
Aves	Lophotis_ruficrista	172689	Chordata	Aves	Gruiformes	Otididae	GCA_013396455.1	1.35069e+09	NA	NA	NA	NA	NA	NA	NA	NA	NA	NA	NA	NA	NA	NA	NA	NA	NA	153689852	11.45	7.82894	105744341
Aves	Chionis_minor	227182	Chordata	Aves	Charadriiformes	Chionididae	GCA_013398295.1	1.42676e+09	NA	NA	NA	NA	NA	NA	NA	NA	588	CRC_AvianBodyMasses	NA	NA	NA	NA	NA	NA	NA	116655860	8.26	4.27019	60925232
Aves	Ibidorhyncha_struthersii	425643	Chordata	Aves	Charadriiformes	Charadriidae	GCA_013398815.1	1.45673e+09	NA	NA	NA	NA	NA	NA	NA	NA	294	CRC_AvianBodyMasses	NA	NA	NA	NA	NA	NA	NA	307929368	21.3	16.363	238364856
Aves	Larus_smithsonianus	243888	Chordata	Aves	Charadriiformes	Laridae	GCA_013400295.1	1.42742e+09	NA	NA	NA	NA	NA	NA	NA	NA	NA	NA	NA	NA	NA	NA	NA	NA	NA	NA	NA	NA	NA
Aves	Rissa_tridactyla	75485	Chordata	Aves	Charadriiformes	Laridae	GCA_013401015.1	1.44959e+09	NA	NA	NA	NA	NA	NA	28.5	AnAge	407.5	CRC_AvianBodyMasses	NA	NA	1460	AnAge	NA	NA	NA	237232836	16.48	12.524	181545743
Aves	Rynchops_niger	227184	Chordata	Aves	Charadriiformes	Laridae	GCA_013400035.1	1.4317e+09	NA	NA	NA	NA	NA	NA	20.2	AnAge	301.5	CRC_AvianBodyMasses	NA	NA	730	AnAge	NA	NA	NA	168560284	11.86	7.75393	111012878
Aves	Stercorarius_parasiticus	54059	Chordata	Aves	Charadriiformes	Stercorariidae	GCA_013396915.1	1.40963e+09	NA	NA	NA	NA	NA	NA	31.1	AnAge	445.5	CRC_AvianBodyMasses	NA	NA	1200	AnAge	NA	NA	NA	175846932	12.56	9.18494	129473918
Aves	Rhinoptilus_africanus	240209	Chordata	Aves	Charadriiformes	Glareolidae	GCA_013400135.1	1.4036e+09	NA	NA	NA	NA	NA	NA	NA	NA	87.5	CRC_AvianBodyMasses	NA	NA	NA	NA	NA	NA	NA	198177668	14.22	10.7892	151436851
Aves	Nycticryphes_semicollaris	227226	Chordata	Aves	Charadriiformes	Rostratulidae	GCA_013400055.1	1.36876e+09	NA	NA	NA	NA	NA	NA	NA	NA	NA	NA	NA	NA	NA	NA	NA	NA	NA	245869400	18.09	12.0945	165543910
Aves	Rostratula_benghalensis	118793	Chordata	Aves	Charadriiformes	Rostratulidae	GCA_013399305.1	1.34094e+09	NA	NA	NA	NA	NA	NA	NA	NA	121	CRC_AvianBodyMasses	NA	NA	NA	NA	NA	NA	NA	153853772	11.55	7.24745	97183849
Aves	Thinocorus_orbignyianus	161742	Chordata	Aves	Ciconiiformes	Thinocoridae	GCA_013400375.1	1.328e+09	NA	NA	NA	NA	NA	NA	NA	NA	115	CRC_AvianBodyMasses	NA	NA	NA	NA	NA	NA	NA	184181828	13.97	10.0631	133637911
Aves	Scolopax_mira	1381582	Chordata	Aves	Charadriiformes	Scolopacidae	GCA_004320125.1	1.32665e+09	NA	NA	NA	NA	NA	NA	NA	NA	447	CRC_AvianBodyMasses	NA	NA	NA	NA	NA	NA	NA	165513536	12.56	8.59945	114084620
Aves	Mesembrinibis_cayennensis	1118748	Chordata	Aves	Pelecaniformes	Threskiornithidae	GCA_013399675.1	1.4536e+09	NA	NA	NA	NA	NA	NA	NA	NA	756	CRC_AvianBodyMasses	NA	NA	NA	NA	NA	NA	NA	299458880	20.75	13.4492	195497367
Aves	Aptenodytes_patagonicus	9234	Chordata	Aves	Sphenisciformes	Spheniscidae	GCA_010087175.1	1.52151e+09	NA	NA	NA	NA	NA	NA	26	AnAge	11751	CRC_AvianBodyMasses	0.00220313	AnAge	NA	NA	NA	NA	NA	115311352	7.63	4.21009	64057028
Aves	Eudyptes_chrysocome	79626	Chordata	Aves	Sphenisciformes	Spheniscidae	GCA_010085355.1	1.49582e+09	NA	NA	NA	NA	NA	NA	NA	NA	2330	CRC_AvianBodyMasses	NA	NA	NA	NA	NA	NA	NA	187169452	12.59	9.44647	141301995
Aves	Eudyptes_filholi	1419345	Chordata	Aves	Sphenisciformes	Spheniscidae	GCA_010085365.1	1.48724e+09	NA	NA	NA	NA	NA	NA	NA	NA	NA	NA	NA	NA	NA	NA	NA	NA	NA	192025928	13	9.09779	135306082
Aves	Eudyptes_pachyrhynchus	37080	Chordata	Aves	Sphenisciformes	Spheniscidae	GCA_010085335.1	1.57381e+09	NA	NA	NA	NA	NA	NA	NA	NA	3910	CRC_AvianBodyMasses	0.00177226	AnimalTraits	NA	NA	NA	NA	NA	189991736	12.15	8.64404	136041188
Aves	Eudyptes_robustus	345251	Chordata	Aves	Sphenisciformes	Spheniscidae	GCA_010085315.1	1.50866e+09	NA	NA	NA	NA	NA	NA	NA	NA	3050	CRC_AvianBodyMasses	NA	NA	NA	NA	NA	NA	NA	217572684	14.52	11.1975	168932371
Aves	Eudyptes_sclateri	92688	Chordata	Aves	Sphenisciformes	Spheniscidae	GCA_010078445.1	1.47202e+09	NA	NA	NA	NA	NA	NA	NA	NA	5908	CRC_AvianBodyMasses	NA	NA	NA	NA	NA	NA	NA	179313368	12.26	8.93388	131508682
Aves	Eudyptes_chrysolophus	79627	Chordata	Aves	Sphenisciformes	Spheniscidae	GCA_010084205.1	1.65877e+09	NA	NA	NA	NA	NA	NA	NA	NA	4490	CRC_AvianBodyMasses	NA	NA	NA	NA	NA	NA	NA	133724832	8.12	3.94593	65453719
Aves	Megadyptes_antipodes_antipodes	2517240	Chordata	Aves	Sphenisciformes	Spheniscidae	GCA_010078485.1	1.59734e+09	NA	NA	NA	NA	NA	NA	NA	NA	5330	CRC_AvianBodyMasses	0.00216381	AnimalTraits	NA	NA	NA	NA	NA	162525048	10.25	6.11526	97681528
Aves	Spheniscus_demersus	92683	Chordata	Aves	Sphenisciformes	Spheniscidae	GCA_010077935.1	1594140000	NA	NA	NA	NA	NA	NA	27.3	AnAge	3135	CRC_AvianBodyMasses	NA	NA	NA	NA	NA	NA	NA	147708520	9.33	5.73143	91367009
Aves	Spheniscus_magellanicus	37081	Chordata	Aves	Sphenisciformes	Spheniscidae	GCA_010076225.1	1.53112e+09	NA	NA	NA	NA	NA	NA	30	AnAge	4120	CRC_AvianBodyMasses	NA	NA	1040	AnAge	NA	NA	NA	210342664	13.83	8.78044	134438941
Aves	Eudyptula_albosignata	345258	Chordata	Aves	Sphenisciformes	Spheniscidae	GCA_010080465.1	1.6646e+09	NA	NA	NA	NA	NA	NA	NA	NA	NA	NA	NA	NA	NA	NA	NA	NA	NA	171424092	10.37	6.20052	103213617
Aves	Eudyptula_minor	37083	Chordata	Aves	Sphenisciformes	Spheniscidae	GCA_010080355.1	1.77607e+09	NA	NA	NA	NA	NA	NA	25.6	AnAge	1110	CRC_AvianBodyMasses	0.00376577	AnimalTraits	NA	NA	NA	NA	NA	199104624	11.29	6.43217	114240070
Aves	Eudyptula_novaehollandiae	2052820	Chordata	Aves	Sphenisciformes	Spheniscidae	GCA_010078495.1	1.64421e+09	NA	NA	NA	NA	NA	NA	NA	NA	NA	NA	NA	NA	NA	NA	NA	NA	NA	175200640	10.73	6.25329	102817136
Aves	Pygoscelis_antarcticus	79643	Chordata	Aves	Sphenisciformes	Spheniscidae	GCA_010078415.1	1.53138e+09	NA	NA	NA	NA	NA	NA	NA	NA	4155.5	CRC_AvianBodyMasses	NA	NA	NA	NA	NA	NA	NA	122880836	8.08	5.28161	80881724
Aves	Pygoscelis_papua	30457	Chordata	Aves	Sphenisciformes	Spheniscidae	GCA_010090195.1	1.58765e+09	NA	NA	NA	NA	NA	NA	NA	NA	5950	CRC_AvianBodyMasses	NA	NA	730	AnAge	NA	NA	NA	184259788	11.69	6.92716	109979089
Aves	Butorides_virescens	110671	Chordata	Aves	Pelecaniformes	Ardeidae	GCA_017310255.1	1.45171e+09	NA	NA	NA	NA	NA	NA	11.6	AnAge	212	CRC_AvianBodyMasses	NA	NA	730	AnAge	NA	NA	NA	131913332	9.15	5.67792	82426995
Aves	Cochlearius_cochlearius	110676	Chordata	Aves	Pelecaniformes	Ardeidae	GCA_013396365.1	1.42644e+09	NA	NA	NA	NA	NA	NA	NA	NA	645	CRC_AvianBodyMasses	NA	NA	NA	NA	NA	NA	NA	197236948	13.92	8.0192	114389275
Aves	Psophia_crepitans	54359	Chordata	Aves	Gruiformes	Psophiidae	GCA_013399095.1	1.42101e+09	NA	NA	NA	NA	NA	NA	NA	NA	1026	CRC_AvianBodyMasses	NA	NA	NA	NA	NA	NA	NA	174549548	12.37	9.12692	129694312
Aves	Aquila_chrysaetos_chrysaetos	223781	Chordata	Aves	Accipitriformes	Accipitridae	GCA_900496995.4	1.49902e+09	NA	NA	NA	NA	NA	NA	48	AnAge	4263.5	CRC_AvianBodyMasses	0.00117108	AnAge	1460	AnAge	NA	NA	NA	191560348	12.86	8.53428	127930223
Aves	Haliaeetus_leucocephalus	52644	Chordata	Aves	Accipitriformes	Accipitridae	GCA_000737465.1	1398540000	NA	NA	NA	NA	NA	NA	48	AnAge	4740	CRC_AvianBodyMasses	NA	NA	1460	AnAge	NA	NA	NA	NA	NA	NA	NA
Aves	Haliaeetus_pelagicus	52647	Chordata	Aves	Accipitriformes	Accipitridae	GCA_014363185.1	1.42913e+09	NA	NA	NA	NA	NA	NA	NA	NA	7757	CRC_AvianBodyMasses	NA	NA	NA	NA	NA	NA	NA	NA	NA	NA	NA
Aves	Nisaetus_nipalensis	214438	Chordata	Aves	Accipitriformes	Accipitridae	GCA_012487455.1	1.45826e+09	NA	NA	NA	NA	NA	NA	NA	NA	NA	NA	NA	NA	NA	NA	NA	NA	NA	176970428	12.22	8.79647	128275223
Aves	Spizaetus_tyrannus	252798	Chordata	Aves	Accipitriformes	Accipitridae	GCA_013399215.1	1.43966e+09	NA	NA	NA	NA	NA	NA	NA	NA	1013	CRC_AvianBodyMasses	NA	NA	NA	NA	NA	NA	NA	187423404	13.11	9.29866	133868818
Aves	Buteo_japonicus	224669	Chordata	Aves	Accipitriformes	Accipitridae	GCA_010312235.1	1.5305e+09	NA	NA	NA	NA	NA	NA	NA	NA	NA	NA	NA	NA	NA	NA	NA	NA	NA	145154920	9.58	6.41548	98188757
Aves	Chunga_burmeisteri	1352770	Chordata	Aves	Cariamiformes	Cariamidae	GCA_013396505.1	1.42033e+09	NA	NA	NA	NA	NA	NA	NA	NA	1298	CRC_AvianBodyMasses	NA	NA	NA	NA	NA	NA	NA	155731308	11.04	7.83992	111352819
Aves	Baryphthengus_martii	176943	Chordata	Aves	Coraciiformes	Momotidae	GCA_013396935.1	1467000000	NA	NA	NA	NA	NA	NA	NA	NA	153	CRC_AvianBodyMasses	NA	NA	NA	NA	NA	NA	NA	NA	NA	NA	NA
Aves	Halcyon_senegalensis	342381	Chordata	Aves	Coraciiformes	Alcedinidae	GCA_013397595.1	1.38286e+09	NA	NA	NA	NA	NA	NA	NA	NA	74.5	CRC_AvianBodyMasses	NA	NA	NA	NA	NA	NA	NA	247756356	18.03	11.5685	159976690
Aves	Eurystomus_gularis	325343	Chordata	Aves	Coraciiformes	Coraciidae	GCA_013400335.1	1.37366e+09	NA	NA	NA	NA	NA	NA	NA	NA	96.3	CRC_AvianBodyMasses	NA	NA	NA	NA	NA	NA	NA	248941856	18.25	11.6702	160309171
Aves	Falco_tinnunculus	100819	Chordata	Aves	Falconiformes	Falconidae	GCA_010332995.1	1506120000	NA	NA	NA	NA	NA	NA	23.8	AnAge	184	CRC_AvianBodyMasses	NA	NA	365	AnAge	NA	NA	NA	175002404	11.73	8.266	124495916
Aves	Herpetotheres_cachinnans	56343	Chordata	Aves	Falconiformes	Falconidae	GCA_013399355.1	1.42832e+09	NA	NA	NA	NA	NA	NA	NA	NA	625	CRC_AvianBodyMasses	NA	NA	NA	NA	NA	NA	NA	189899860	13.38	8.74688	124933788
Aves	Rhynochetos_jubatus	54386	Chordata	Aves	Gruiformes	Rhynochetidae	GCA_013398095.1	1.35705e+09	NA	NA	NA	NA	NA	NA	NA	NA	860	CRC_AvianBodyMasses	NA	NA	NA	NA	NA	NA	NA	240836952	17.89	13.0943	177696265
Aves	Anseranas_semipalmata	8851	Chordata	Aves	Anseriformes	Anseranatidae	GCA_013399115.1	1.37523e+09	NA	NA	NA	NA	NA	NA	NA	NA	2418.5	CRC_AvianBodyMasses	NA	NA	NA	NA	NA	NA	NA	201696304	14.77	12.3099	169289107
Aves	Anser_brachyrhynchus	132585	Chordata	Aves	Anseriformes	Anatidae	GCA_002592135.1	1.35776e+09	NA	NA	NA	NA	NA	NA	40.9	AnAge	2645	CRC_AvianBodyMasses	NA	NA	1095	AnAge	NA	NA	NA	143370892	10.65	8.0411	109178488
Aves	Branta_canadensis	8853	Chordata	Aves	Anseriformes	Anatidae	GCA_006130075.1	1.4018e+09	NA	NA	NA	NA	NA	NA	42	AnAge	3564	CRC_AvianBodyMasses	NA	NA	730	AnAge	NA	NA	NA	NA	NA	NA	NA
Aves	Asarcornis_scutulata	75869	Chordata	Aves	Anseriformes	Anatidae	GCA_013398475.1	1.35895e+09	NA	NA	NA	NA	NA	NA	NA	NA	NA	NA	NA	NA	NA	NA	NA	NA	NA	NA	NA	NA	NA
Aves	Cairina_moschata	8855	Chordata	Aves	Anseriformes	Anatidae	GCA_018104995.1	1310520000	NA	NA	NA	NA	NA	NA	NA	NA	2450	CRC_AvianBodyMasses	NA	NA	NA	NA	NA	NA	NA	156040944	11.99	9.23214	120989074
Aves	Aythya_fuligula	219594	Chordata	Aves	Anseriformes	Anatidae	GCA_009819795.1	1.36987e+09	NA	NA	NA	NA	NA	NA	45.2	AnAge	701.5	CRC_AvianBodyMasses	0.00385285	AnimalTraits	365	AnAge	NA	NA	NA	126331568	9.28	6.37654	87350561
Aves	Callipepla_squamata	9009	Chordata	Aves	Galliformes	Odontophoridae	GCA_002218305.1	1.27096e+09	NA	NA	NA	NA	NA	NA	NA	NA	184	CRC_AvianBodyMasses	NA	NA	NA	NA	NA	NA	NA	NA	NA	NA	NA
Aves	Colinus_virginianus	9014	Chordata	Aves	Galliformes	Odontophoridae	GCA_008692595.2	1.15387e+09	NA	NA	NA	NA	NA	NA	6.4	AnAge	178	CRC_AvianBodyMasses	0.00626147	AnimalTraits	365	AnAge	NA	NA	NA	174197028	15.2	9.13453	105400996
Aves	Odontophorus_gujanensis	886794	Chordata	Aves	Galliformes	Odontophoridae	GCA_013399175.1	1.18919e+09	NA	NA	NA	NA	NA	NA	NA	NA	314.5	CRC_AvianBodyMasses	NA	NA	NA	NA	NA	NA	NA	206662496	17.5	11.8469	140881818
Aves	Coturnix_japonica	93934	Chordata	Aves	Galliformes	Phasianidae	GCA_001577835.2	1378980000	NA	NA	NA	NA	NA	NA	6	AnAge	94.8	CRC_AvianBodyMasses	0.0103141	AnimalTraits	57.5	AnAge	NA	NA	NA	341419728	25.03	18.7928	259149338
Aves	Lagopus_leucura	30410	Chordata	Aves	Galliformes	Phasianidae	GCA_019238085.1	1.23555e+09	NA	NA	NA	NA	NA	NA	15	AnAge	355	CRC_AvianBodyMasses	NA	NA	365	AnAge	NA	NA	NA	107991544	8.8	4.78072	59067971
Aves	Lagopus_muta_japonica	1604048	Chordata	Aves	Galliformes	Phasianidae	GCA_004320205.1	1.21925e+09	NA	NA	NA	NA	NA	NA	NA	NA	535.5	CRC_AvianBodyMasses	NA	NA	NA	NA	NA	NA	NA	129156412	10.66	6.28258	76600570
Aves	Syrmaticus_mikado	9065	Chordata	Aves	Galliformes	Phasianidae	GCA_003435085.1	1.29655e+09	NA	NA	NA	NA	NA	NA	NA	NA	1157.5	CRC_AvianBodyMasses	NA	NA	NA	NA	NA	NA	NA	215538688	16.74	9.84827	127688074
Aves	Pavo_muticus	9050	Chordata	Aves	Galliformes	Phasianidae	GCA_016647715.1	1310520000	NA	NA	NA	NA	NA	NA	NA	NA	2767.5	CRC_AvianBodyMasses	NA	NA	NA	NA	NA	NA	NA	213204608	16.4	9.7138	127301345
Aves	Penelope_pileata	1118817	Chordata	Aves	Galliformes	Cracidae	GCA_013396635.1	1.25001e+09	NA	NA	NA	NA	NA	NA	NA	NA	1260	CRC_AvianBodyMasses	NA	NA	NA	NA	NA	NA	NA	152090444	12.25	7.33054	91632481
Aves	Apteryx_haastii	8823	Chordata	Aves	Apterygiformes	Apterygidae	GCA_003342985.1	1.48417e+09	NA	NA	NA	NA	NA	NA	NA	NA	1692	CRC_AvianBodyMasses	0.0024734	AnimalTraits	NA	NA	NA	NA	NA	211009868	14.33	10.3873	154165130
Aves	Apteryx_owenii	8824	Chordata	Aves	Apterygiformes	Apterygidae	GCA_003342965.1	1.49608e+09	NA	NA	NA	NA	NA	NA	NA	NA	1243	CRC_AvianBodyMasses	0.00191204	AnimalTraits	NA	NA	NA	NA	NA	NA	NA	NA	NA
Aves	Apteryx_rowi	308060	Chordata	Aves	Apterygiformes	Apterygidae	GCA_003343035.1	1.4932e+09	NA	NA	NA	NA	NA	NA	NA	NA	NA	NA	NA	NA	NA	NA	NA	NA	NA	233536692	15.77	11.3813	169945562
Aves	Casuarius_casuarius	8787	Chordata	Aves	Casuariiformes	Casuariidae	GCA_003342895.1	1.46912e+09	NA	NA	NA	NA	NA	NA	30	AnAge	44000	CRC_AvianBodyMasses	NA	NA	NA	NA	NA	NA	NA	NA	NA	NA	NA
Aves	Dromaius_novaehollandiae	8790	Chordata	Aves	Casuariiformes	Dromaiidae	GCA_003342905.1	1594140000	NA	NA	NA	NA	NA	NA	16.6	AnAge	34200	CRC_AvianBodyMasses	0.00127091	AnimalTraits	NA	NA	NA	NA	NA	292369612	18.48	13.8345	220541341
Aves	Rhea_americana	8797	Chordata	Aves	Rheiformes	Rheidae	GCA_003343005.1	1.41082e+09	NA	NA	NA	NA	NA	NA	NA	NA	23000	CRC_AvianBodyMasses	NA	NA	426	AnAge	NA	NA	NA	165608656	11.83	8.58861	121169980
Aves	Rhea_pennata	8795	Chordata	Aves	Rheiformes	Rheidae	GCA_003342835.1	1.41984e+09	NA	NA	NA	NA	NA	NA	NA	NA	23900	CRC_AvianBodyMasses	NA	NA	NA	NA	NA	NA	NA	199814896	14.19	10.128	143801340
Aves	Crypturellus_cinnamomeus	889801	Chordata	Aves	Tinamiformes	Tinamidae	GCA_003342915.1	1.36387e+09	NA	NA	NA	NA	NA	NA	NA	NA	422	CRC_AvianBodyMasses	NA	NA	NA	NA	NA	NA	NA	189644624	14.02	9.7532	133021420
Aves	Crypturellus_undulatus	48396	Chordata	Aves	Tinamiformes	Tinamidae	GCA_013389825.1	1.24209e+09	NA	NA	NA	NA	NA	NA	NA	NA	567	CRC_AvianBodyMasses	NA	NA	NA	NA	NA	NA	NA	344561232	27.93	20.759	257845080
Aves	Crypturellus_soui	458187	Chordata	Aves	Tinamiformes	Tinamidae	GCA_013389845.1	1.26864e+09	NA	NA	NA	NA	NA	NA	NA	NA	217	CRC_AvianBodyMasses	NA	NA	NA	NA	NA	NA	NA	299942456	23.81	18.1611	230398601
Aves	Eudromia_elegans	8805	Chordata	Aves	Tinamiformes	Tinamidae	GCA_003342815.1	1212720000	NA	NA	NA	NA	NA	NA	NA	NA	694.5	CRC_AvianBodyMasses	NA	NA	NA	NA	NA	NA	NA	86634640	7.2	4.62347	56069792
Aves	Nothoprocta_perdicaria	30464	Chordata	Aves	Tinamiformes	Tinamidae	GCA_003342845.1	1.17489e+09	NA	NA	NA	NA	NA	NA	NA	NA	458	CRC_AvianBodyMasses	NA	NA	NA	NA	NA	NA	NA	122729640	10.53	6.91123	81199337
Mollusca	Nautilus_pompilius	34573	Mollusca	Cephalopoda	Nautilida	Nautilidae	GCA_018389105.1	8.88181e+08	NA	NA	NA	NA	NA	NA	NA	NA	NA	NA	NA	NA	NA	NA	NA	NA	NA	217812420	24.69	16.6748	148102195
Mollusca	Octopus_sinensis	2607531	Mollusca	Cephalopoda	Octopoda	Octopodidae	GCA_006345805.1	3.29689e+09	NA	NA	NA	NA	NA	NA	NA	NA	NA	NA	NA	NA	NA	NA	NA	NA	NA	1941197008	59.27	44.0929	1453694857
Mollusca	Sepia_pharaonis	158019	Mollusca	Cephalopoda	Sepiida	Sepiidae	GCA_903632075.3	5.79789e+09	NA	NA	NA	NA	NA	NA	NA	NA	NA	NA	NA	NA	NA	NA	NA	NA	NA	5439448052	94.48	94.2227	5462923715
Mollusca	Archivesica_marissinica	2291877	Mollusca	Bivalvia	Venerida	Vesicomyidae	GCA_014843695.1	1.87531e+09	NA	NA	NA	NA	NA	NA	NA	NA	NA	NA	NA	NA	NA	NA	NA	NA	NA	1222459992	65.63	37.7844	708576274
Mollusca	Cyclina_sinensis	120566	Mollusca	Bivalvia	Venerida	Veneridae	GCA_012932295.1	1.0989e+09	NA	NA	NA	NA	NA	NA	NA	NA	NA	NA	NA	NA	NA	NA	NA	NA	NA	388288204	35.58	25.1884	276794911
Mollusca	Mercenaria_mercenaria	6596	Mollusca	Bivalvia	Venerida	Veneridae	GCA_014805675.1	2.17032e+09	NA	NA	NA	NA	NA	NA	NA	NA	NA	NA	NA	NA	NA	NA	NA	NA	NA	1104056320	51.2	34.0189	738318192
Mollusca	Lutraria_rhynchaena	1380851	Mollusca	Bivalvia	Venerida	Mactridae	GCA_008271625.1	6.6413e+08	NA	NA	NA	NA	NA	NA	NA	NA	NA	NA	NA	NA	NA	NA	NA	NA	NA	183145160	27.77	11.1976	74366317
Mollusca	Sinonovacula_constricta	98310	Mollusca	Bivalvia	Cardiida	Solecurtidae	GCA_007844125.1	1.48345e+09	NA	NA	NA	NA	NA	NA	NA	NA	NA	NA	NA	NA	NA	NA	NA	NA	NA	NA	NA	NA	NA
Mollusca	Megalonaias_nervosa	52375	Mollusca	Bivalvia	Unionida	Unionidae	GCA_016617855.1	2.86852e+09	NA	NA	NA	NA	NA	NA	NA	NA	NA	NA	NA	NA	NA	NA	NA	NA	NA	1478599756	51.9	20.0356	574725261
Mollusca	Potamilus_streckersoni	2493646	Mollusca	Bivalvia	Unionida	Unionidae	GCA_016746295.1	2.15628e+09	NA	NA	NA	NA	NA	NA	NA	NA	NA	NA	NA	NA	NA	NA	NA	NA	NA	649155620	30.3	15.7882	340438634
Mollusca	Argopecten_irradians_irradians	158587	Mollusca	Bivalvia	Pectinida	Pectinidae	GCA_004382745.1	1.01717e+09	NA	NA	NA	NA	NA	NA	NA	NA	NA	NA	NA	NA	NA	NA	NA	NA	NA	503824708	49.88	34.8712	354700381
Mollusca	Pecten_maximus	6579	Mollusca	Bivalvia	Pectinida	Pectinidae	GCA_902652985.1	1388760000	NA	NA	NA	NA	NA	NA	NA	NA	NA	NA	NA	NA	NA	NA	NA	NA	NA	481034544	34.88	23.4267	325340094
Mollusca	Mizuhopecten_yessoensis	6573	Mollusca	Bivalvia	Pectinida	Pectinidae	GCA_002113885.2	1652820000	NA	NA	NA	NA	NA	NA	NA	NA	NA	NA	NA	NA	NA	NA	NA	NA	NA	695500572	42.53	24.1556	399247803
Mollusca	Crassostrea_gigas	29159	Mollusca	Bivalvia	Ostreida	Ostreidae	GCA_902806645.1	635700000	NA	NA	NA	NA	NA	NA	NA	NA	NA	NA	NA	NA	NA	NA	NA	NA	NA	246496724	39.05	20.0873	127694828
Mollusca	Crassostrea_virginica	6565	Mollusca	Bivalvia	Ostreida	Ostreidae	GCA_002022765.4	8.3459e+08	NA	NA	NA	NA	NA	NA	NA	NA	NA	NA	NA	NA	NA	NA	NA	NA	NA	NA	NA	NA	NA
Mollusca	Mytilus_coruscus	42192	Mollusca	Bivalvia	Mytiloida	Mytilidae	GCA_017311375.1	1858200000	NA	NA	NA	NA	NA	NA	NA	NA	NA	NA	NA	NA	NA	NA	NA	NA	NA	NA	NA	NA	NA
Mollusca	Mytilus_edulis	6550	Mollusca	Bivalvia	Mytiloida	Mytilidae	GCA_905397895.1	1564800000	NA	NA	NA	NA	NA	NA	NA	NA	NA	NA	NA	NA	NA	NA	NA	NA	NA	NA	NA	NA	NA
Mollusca	Mytilus_galloprovincialis	29158	Mollusca	Bivalvia	Mytiloida	Mytilidae	GCA_900618805.1	1877760000	NA	NA	NA	NA	NA	NA	NA	NA	NA	NA	NA	NA	NA	NA	NA	NA	NA	762499756	41.04	26.8511	504198908
Mollusca	Perna_viridis	73031	Mollusca	Bivalvia	Mytiloida	Mytilidae	GCA_018327765.1	8.91637e+08	NA	NA	NA	NA	NA	NA	NA	NA	NA	NA	NA	NA	NA	NA	NA	NA	NA	351829872	39.62	18.4781	164757405
Mollusca	Chrysomallon_squamiferum	216257	Mollusca	Gastropoda	NA	Peltospiridae	GCA_012295275.1	4.95541e+08	NA	NA	NA	NA	NA	NA	NA	NA	NA	NA	NA	NA	NA	NA	NA	NA	NA	NA	NA	NA	NA
Mollusca	Haliotis_rubra	36100	Mollusca	Gastropoda	Lepetellida	Haliotidae	GCA_003918875.1	1.67398e+09	NA	NA	NA	NA	NA	NA	NA	NA	NA	NA	NA	NA	NA	NA	NA	NA	NA	742569376	44.65	22.832	382203470
Mollusca	Haliotis_rufescens	6454	Mollusca	Gastropoda	Lepetellida	Haliotidae	GCA_003343065.1	1.81975e+09	NA	NA	NA	NA	NA	NA	NA	NA	NA	NA	NA	NA	NA	NA	NA	NA	NA	712219296	39.41	18.0176	327875099
Mollusca	Batillaria_attramentaria	370345	Mollusca	Gastropoda	NA	Batillariidae	GCA_018292915.1	8.74322e+08	NA	NA	NA	NA	NA	NA	NA	NA	NA	NA	NA	NA	NA	NA	NA	NA	NA	243554956	28.14	15.1972	132872697
Mollusca	Marisa_cornuarietis	75126	Mollusca	Gastropoda	Architaenioglossa	Ampullariidae	GCA_004794655.1	6.53702e+08	NA	NA	NA	NA	NA	NA	NA	NA	NA	NA	NA	NA	NA	NA	NA	NA	NA	135046044	20.8	10.7837	70493047
Mollusca	Pomacea_canaliculata	400727	Mollusca	Gastropoda	Architaenioglossa	Ampullariidae	GCA_003073045.1	5.38566e+08	NA	NA	NA	NA	NA	NA	NA	NA	NA	NA	NA	NA	NA	NA	NA	NA	NA	NA	NA	NA	NA
Mollusca	Achatina_immaculata	2605667	Mollusca	Gastropoda	Stylommatophora	Achatinidae	GCA_009760885.1	2.00669e+09	NA	NA	NA	NA	NA	NA	NA	NA	NA	NA	NA	NA	NA	NA	NA	NA	NA	883250828	44.32	15.9293	319650240
Mollusca	Candidula_unifasciata	100452	Mollusca	Gastropoda	Stylommatophora	Geomitridae	GCA_905116865.2	1.64784e+09	NA	NA	NA	NA	NA	NA	NA	NA	NA	NA	NA	NA	NA	NA	NA	NA	NA	756822084	46.25	17.0403	280795616
Mollusca	Cepaea_nemoralis	28835	Mollusca	Gastropoda	Stylommatophora	Helicidae	GCA_014155875.1	4.23099e+09	NA	NA	NA	NA	NA	NA	NA	NA	NA	NA	NA	NA	NA	NA	NA	NA	NA	2754447864	65.56	32.9787	1395324567
Insecta	Actias_luna	63976	Arthropoda	Insecta	Lepidoptera	Saturniidae	GCA_010014465.1	547680000	NA	NA	NA	NA	NA	NA	NA	NA	NA	NA	NA	NA	NA	NA	NA	NA	NA	258640232	47.73	37.6124	205995836
Insecta	Antheraea_mylitta	34739	Arthropoda	Insecta	Lepidoptera	Saturniidae	GCA_014332785.1	8.51131e+08	NA	NA	NA	NA	NA	NA	NA	NA	NA	NA	NA	NA	NA	NA	NA	NA	NA	311839736	36.89	17.5726	149565622
Insecta	Bombyx_mori	7091	Arthropoda	Insecta	Lepidoptera	Bombycidae	GCA_014905235.2	508560000	NA	NA	NA	NA	NA	NA	NA	NA	NA	NA	NA	NA	NA	NA	NA	NA	NA	146071988	28.93	18.5502	94338656
Insecta	Hyles_vespertilio	283848	Arthropoda	Insecta	Lepidoptera	Sphingidae	GCA_009982885.1	7.94234e+08	NA	NA	NA	NA	NA	NA	NA	NA	NA	NA	NA	NA	NA	NA	NA	NA	NA	NA	NA	NA	NA
Insecta	Manduca_sexta	7130	Arthropoda	Insecta	Lepidoptera	Sphingidae	GCA_014839805.1	420540000	NA	NA	NA	NA	NA	NA	NA	NA	NA	NA	NA	NA	NA	NA	NA	NA	NA	91541276	21.92	11.0832	46609085
Insecta	Dendrolimus_punctatus	238572	Arthropoda	Insecta	Lepidoptera	Lasiocampidae	GCA_012273795.1	7.49056e+08	NA	NA	NA	NA	NA	NA	NA	NA	NA	NA	NA	NA	NA	NA	NA	NA	NA	NA	NA	NA	NA
Insecta	Arctia_plantaginis	874455	Arthropoda	Insecta	Lepidoptera	Erebidae	GCA_902825455.1	7.0539e+08	NA	NA	NA	NA	NA	NA	NA	NA	NA	NA	NA	NA	NA	NA	NA	NA	NA	236677208	33.79	18.3086	129147273
Insecta	Spodoptera_exigua	7107	Arthropoda	Insecta	Lepidoptera	Noctuidae	GCA_011316535.1	5.46605e+08	NA	NA	NA	NA	NA	NA	NA	NA	NA	NA	NA	NA	NA	NA	NA	NA	NA	166782984	30.72	19.7354	107874715
Insecta	Spodoptera_frugiperda	7108	Arthropoda	Insecta	Lepidoptera	Noctuidae	GCA_011064685.1	5.94377e+08	NA	NA	NA	NA	NA	NA	NA	NA	NA	NA	NA	NA	NA	NA	NA	NA	NA	147555300	25	14.3662	85389451
Insecta	Cnaphalocrocis_medinalis	437488	Arthropoda	Insecta	Lepidoptera	Crambidae	GCA_014851415.1	6.45427e+08	NA	NA	NA	NA	NA	NA	NA	NA	NA	NA	NA	NA	NA	NA	NA	NA	NA	NA	NA	NA	NA
Insecta	Galleria_mellonella	7137	Arthropoda	Insecta	Lepidoptera	Pyralidae	GCA_004355975.1	5.907e+08	NA	NA	NA	NA	NA	NA	NA	NA	NA	NA	NA	NA	NA	NA	NA	NA	NA	NA	NA	NA	NA
Insecta	Plodia_interpunctella	58824	Arthropoda	Insecta	Lepidoptera	Pyralidae	GCA_001368715.1	4.68117e+08	NA	NA	NA	NA	NA	NA	NA	NA	NA	NA	NA	NA	NA	NA	NA	NA	NA	68491100	14.79	7.40593	34668402
Insecta	Bicyclus_anynana	110368	Arthropoda	Insecta	Lepidoptera	Nymphalidae	GCA_900239965.1	479220000	NA	NA	NA	NA	NA	NA	0.5	NA	NA	NA	NA	NA	15	AnAge	NA	NA	NA	144809808	30.47	13.4792	64594907
Insecta	Lasiommata_megera	111917	Arthropoda	Insecta	Lepidoptera	Nymphalidae	GCA_928268935.1	5.97023e+08	NA	NA	NA	NA	NA	NA	NA	NA	NA	NA	NA	NA	NA	NA	NA	NA	NA	143025260	24.12	15.1223	90283653
Insecta	Erebia_aethiops	447833	Arthropoda	Insecta	Lepidoptera	Nymphalidae	GCA_923060345.1	5.78882e+08	NA	NA	NA	NA	NA	NA	NA	NA	NA	NA	NA	NA	NA	NA	NA	NA	NA	184835132	32.15	22.1786	128387966
Insecta	Erebia_ligea	111903	Arthropoda	Insecta	Lepidoptera	Nymphalidae	GCA_917051295.1	6.19023e+08	NA	NA	NA	NA	NA	NA	NA	NA	NA	NA	NA	NA	NA	NA	NA	NA	NA	213602736	34.75	26.2358	162405519
Insecta	Maniola_hyperantus	2795564	Arthropoda	Insecta	Lepidoptera	Nymphalidae	GCA_902806685.2	4.99809e+08	NA	NA	NA	NA	NA	NA	NA	NA	NA	NA	NA	NA	NA	NA	NA	NA	NA	157514000	31.73	20.39	101910945
Insecta	Melanargia_galathea	111923	Arthropoda	Insecta	Lepidoptera	Nymphalidae	GCA_920104075.1	7.39743e+08	NA	NA	NA	NA	NA	NA	NA	NA	NA	NA	NA	NA	NA	NA	NA	NA	NA	300552592	40.91	32.977	243944678
Insecta	Elymnias_hypermnestra	366056	Arthropoda	Insecta	Lepidoptera	Nymphalidae	GCA_015832385.1	6.92005e+08	NA	NA	NA	NA	NA	NA	NA	NA	NA	NA	NA	NA	NA	NA	NA	NA	NA	247559016	36.14	14.5808	100900190
Insecta	Boloria_selene	191398	Arthropoda	Insecta	Lepidoptera	Nymphalidae	GCA_905231865.2	4.8986e+08	NA	NA	NA	NA	NA	NA	NA	NA	NA	NA	NA	NA	NA	NA	NA	NA	NA	132857172	27.31	20.8729	102247925
Insecta	Fabriciana_adippe	405009	Arthropoda	Insecta	Lepidoptera	Nymphalidae	GCA_905404265.1	5.92628e+08	NA	NA	NA	NA	NA	NA	NA	NA	NA	NA	NA	NA	NA	NA	NA	NA	NA	186153572	31.63	16.5226	97917379
Insecta	Heliconius_sara	33443	Arthropoda	Insecta	Lepidoptera	Nymphalidae	GCA_917862395.1	4.28103e+08	NA	NA	NA	NA	NA	NA	NA	NA	NA	NA	NA	NA	NA	NA	NA	NA	NA	73978592	17.4	8.55705	36632997
Insecta	Limenitis_camilla	270466	Arthropoda	Insecta	Lepidoptera	Nymphalidae	GCA_905147385.1	5.32458e+08	NA	NA	NA	NA	NA	NA	NA	NA	NA	NA	NA	NA	NA	NA	NA	NA	NA	142261504	26.9	13.8735	73870386
Insecta	Hypolimnas_misippus	124412	Arthropoda	Insecta	Lepidoptera	Nymphalidae	GCA_008963455.1	5.00603e+08	NA	NA	NA	NA	NA	NA	NA	NA	NA	NA	NA	NA	NA	NA	NA	NA	NA	120256676	24.24	9.95378	49828986
Insecta	Mellicta_athalia	113330	Arthropoda	Insecta	Lepidoptera	Nymphalidae	GCA_905220545.2	7.43602e+08	NA	NA	NA	NA	NA	NA	NA	NA	NA	NA	NA	NA	NA	NA	NA	NA	NA	285866820	38.71	29.8439	221919582
Insecta	Nymphalis_io	171585	Arthropoda	Insecta	Lepidoptera	Nymphalidae	GCA_905147045.1	4.70803e+08	NA	NA	NA	NA	NA	NA	NA	NA	NA	NA	NA	NA	NA	NA	NA	NA	NA	109457888	23.41	16.459	77489701
Insecta	Nymphalis_urticae	111881	Arthropoda	Insecta	Lepidoptera	Nymphalidae	GCA_905147175.2	4.81269e+08	NA	NA	NA	NA	NA	NA	NA	NA	NA	NA	NA	NA	NA	NA	NA	NA	NA	100722156	21.07	14.287	68758611
Insecta	Nymphalis_polychloros	171594	Arthropoda	Insecta	Lepidoptera	Nymphalidae	GCA_905220585.2	4.87676e+08	NA	NA	NA	NA	NA	NA	NA	NA	NA	NA	NA	NA	NA	NA	NA	NA	NA	113683636	23.47	15.5775	75967686
Insecta	Vanessa_atalanta	42275	Arthropoda	Insecta	Lepidoptera	Nymphalidae	GCA_905147765.2	4.54178e+08	NA	NA	NA	NA	NA	NA	NA	NA	NA	NA	NA	NA	NA	NA	NA	NA	NA	62969412	13.96	7.61718	34595569
Insecta	Vanessa_tameamea	334116	Arthropoda	Insecta	Lepidoptera	Nymphalidae	GCA_002938995.1	4.38067e+08	NA	NA	NA	NA	NA	NA	NA	NA	NA	NA	NA	NA	NA	NA	NA	NA	NA	NA	NA	NA	NA
Insecta	Vanessa_cardui	171605	Arthropoda	Insecta	Lepidoptera	Nymphalidae	GCA_905220365.1	5.19993e+08	NA	NA	NA	NA	NA	NA	NA	NA	NA	NA	NA	NA	NA	NA	NA	NA	NA	110524152	21.4	12.9294	67232134
Insecta	Danaus_chrysippus	151541	Arthropoda	Insecta	Lepidoptera	Nymphalidae	GCA_004959915.1	3.96038e+08	NA	NA	NA	NA	NA	NA	NA	NA	NA	NA	NA	NA	NA	NA	NA	NA	NA	159764940	40.5	26.648	105536395
Insecta	Danaus_plexippus	13037	Arthropoda	Insecta	Lepidoptera	Nymphalidae	GCA_018135715.1	283620000	NA	NA	NA	NA	NA	NA	NA	NA	NA	NA	NA	NA	NA	NA	NA	NA	NA	32139812	11.41	7.73736	21944710
Insecta	Delias_pasithoe	152616	Arthropoda	Insecta	Lepidoptera	Pieridae	GCA_010014985.1	3.65517e+08	NA	NA	NA	NA	NA	NA	NA	NA	NA	NA	NA	NA	NA	NA	NA	NA	NA	60756776	16.73	6.05842	22144555
Insecta	Pieris_rapae	64459	Arthropoda	Insecta	Lepidoptera	Pieridae	GCA_001856805.1	3.03414e+08	NA	NA	NA	NA	NA	NA	NA	NA	NA	NA	NA	NA	NA	NA	NA	NA	NA	53566520	17.78	10.371	31467147
Insecta	Epargyreus_clarus_clarus	2201626	Arthropoda	Insecta	Lepidoptera	Hesperiidae	GCA_014595695.2	5.21903e+08	NA	NA	NA	NA	NA	NA	NA	NA	NA	NA	NA	NA	NA	NA	NA	NA	NA	132237580	25.51	14.4408	75367227
Insecta	Hyposmocoma_kahamanoa	1477025	Arthropoda	Insecta	Lepidoptera	Cosmopterigidae	GCA_003589595.1	8.91112e+08	NA	NA	NA	NA	NA	NA	NA	NA	NA	NA	NA	NA	NA	NA	NA	NA	NA	NA	NA	NA	NA
Insecta	Plutella_xylostella	51655	Arthropoda	Insecta	Lepidoptera	Plutellidae	GCA_902505585.1	4.05678e+08	NA	NA	NA	NA	NA	NA	NA	NA	NA	NA	NA	NA	NA	NA	NA	NA	NA	NA	NA	NA	NA
Insecta	Eumeta_japonica	151549	Arthropoda	Insecta	Lepidoptera	Psychidae	GCA_005406025.1	8.8588e+08	NA	NA	NA	NA	NA	NA	NA	NA	NA	NA	NA	NA	NA	NA	NA	NA	NA	278268512	31.53	14.3521	127142410
Insecta	Hydropsyche_tenuis	577407	Arthropoda	Insecta	Trichoptera	Hydropsychidae	GCA_009617725.1	2.83797e+08	NA	NA	NA	NA	NA	NA	NA	NA	NA	NA	NA	NA	NA	NA	NA	NA	NA	42766640	15.17	8.22789	23350513
Insecta	Plectrocnemia_conspersa	161770	Arthropoda	Insecta	Trichoptera	Polycentropodidae	GCA_009617715.1	4.8596e+08	NA	NA	NA	NA	NA	NA	NA	NA	NA	NA	NA	NA	NA	NA	NA	NA	NA	116394384	24.12	10.9516	53220630
Insecta	Stenopsyche_tienmushanensis	1560151	Arthropoda	Insecta	Trichoptera	Stenopsychidae	GCA_008973525.1	5.52285e+08	NA	NA	NA	NA	NA	NA	NA	NA	NA	NA	NA	NA	NA	NA	NA	NA	NA	NA	NA	NA	NA
Insecta	Aedes_aegypti	7159	Arthropoda	Insecta	Diptera	Culicidae	GCA_002204515.1	1222500000	NA	NA	NA	NA	NA	NA	NA	NA	NA	NA	NA	NA	NA	NA	NA	NA	NA	NA	NA	NA	NA
Insecta	Aedes_albopictus	7160	Arthropoda	Insecta	Diptera	Culicidae	GCA_001876365.2	2.72578e+09	NA	NA	NA	NA	NA	NA	NA	NA	NA	NA	NA	NA	NA	NA	NA	NA	NA	1824740248	67.56	35.7375	974126933
Insecta	Anopheles_albimanus	7167	Arthropoda	Insecta	Diptera	Culicidae	GCA_013758885.1	2.14735e+08	NA	NA	NA	NA	NA	NA	NA	NA	NA	NA	NA	NA	NA	NA	NA	NA	NA	NA	NA	NA	NA
Insecta	Anopheles_atroparvus	41427	Arthropoda	Insecta	Diptera	Culicidae	GCA_000473505.1	234720000	NA	NA	NA	NA	NA	NA	NA	NA	NA	NA	NA	NA	NA	NA	NA	NA	NA	48153692	17.83	14.5767	34214423
Insecta	Anopheles_coluzzii	1518534	Arthropoda	Insecta	Diptera	Culicidae	GCA_004136515.2	3.10104e+08	NA	NA	NA	NA	NA	NA	NA	NA	NA	NA	NA	NA	NA	NA	NA	NA	NA	NA	NA	NA	NA
Insecta	Anopheles_gambiae	7165	Arthropoda	Insecta	Diptera	Culicidae	GCA_001542645.1	3.61342e+08	NA	NA	NA	NA	NA	NA	NA	NA	NA	NA	NA	NA	NA	NA	NA	NA	NA	95431776	27.03	19.6413	70972119
Insecta	Anopheles_epiroticus	199890	Arthropoda	Insecta	Diptera	Culicidae	GCA_000349105.1	2.76321e+08	NA	NA	NA	NA	NA	NA	NA	NA	NA	NA	NA	NA	NA	NA	NA	NA	NA	NA	NA	NA	NA
Insecta	Anopheles_funestus	62324	Arthropoda	Insecta	Diptera	Culicidae	GCA_003951495.1	5.43856e+08	NA	NA	NA	NA	NA	NA	NA	NA	NA	NA	NA	NA	NA	NA	NA	NA	NA	135742692	25.44	18.0009	97898991
Insecta	Anopheles_stephensi	30069	Arthropoda	Insecta	Diptera	Culicidae	GCA_013141755.1	234720000	NA	NA	NA	NA	NA	NA	NA	NA	NA	NA	NA	NA	NA	NA	NA	NA	NA	59308700	20.14	15.9452	37426509
Insecta	Culicoides_sonorensis	179676	Arthropoda	Insecta	Diptera	Ceratopogonidae	GCA_900002565.1	2.59306e+08	NA	NA	NA	NA	NA	NA	NA	NA	NA	NA	NA	NA	NA	NA	NA	NA	NA	45153844	17.81	12.9338	33538209
Insecta	Bactrocera_oleae	104688	Arthropoda	Insecta	Diptera	Tephritidae	GCA_001188975.4	5.92755e+08	NA	NA	NA	NA	NA	NA	NA	NA	NA	NA	NA	NA	NA	NA	NA	NA	NA	175596820	30.15	15.1872	90022683
Insecta	Drosophila_albomicans	7291	Arthropoda	Insecta	Diptera	Drosophilidae	GCA_009650485.1	2.06538e+08	NA	NA	NA	NA	NA	NA	NA	NA	NA	NA	NA	NA	NA	NA	NA	NA	NA	19932704	9.94	6.91909	14290575
Insecta	Drosophila_innubila	198719	Arthropoda	Insecta	Diptera	Drosophilidae	GCA_004354385.2	2.07088e+08	NA	NA	NA	NA	NA	NA	NA	NA	NA	NA	NA	NA	NA	NA	NA	NA	NA	62028456	30.19	22.7949	47205659
Insecta	Drosophila_hydei	7224	Arthropoda	Insecta	Diptera	Drosophilidae	GCA_003285905.2	205380000	NA	NA	NA	NA	NA	NA	NA	NA	NA	NA	NA	NA	NA	NA	NA	NA	NA	NA	NA	NA	NA
Insecta	Drosophila_novamexicana	47314	Arthropoda	Insecta	Diptera	Drosophilidae	GCA_003285875.3	244500000	NA	NA	NA	NA	NA	NA	NA	NA	NA	NA	NA	NA	NA	NA	NA	NA	NA	NA	NA	NA	NA
Insecta	Drosophila_virilis	7244	Arthropoda	Insecta	Diptera	Drosophilidae	GCA_007989325.2	332520000	NA	NA	NA	NA	NA	NA	NA	NA	0.00167	AnimalTraits	0.0200064	NA	NA	NA	NA	NA	NA	NA	NA	NA	NA
Insecta	Drosophila_lacertosa	119604	Arthropoda	Insecta	Diptera	Drosophilidae	GCA_004143845.1	1.92378e+08	NA	NA	NA	NA	NA	NA	NA	NA	NA	NA	NA	NA	NA	NA	NA	NA	NA	23335064	12.51	9.2486	17792294
Insecta	Drosophila_micromelanica	189258	Arthropoda	Insecta	Diptera	Drosophilidae	GCA_004143825.1	1.95655e+08	NA	NA	NA	NA	NA	NA	NA	NA	NA	NA	NA	NA	NA	NA	NA	NA	NA	42778356	22.54	13.0825	25596577
Insecta	Drosophila_nigromelanica	499227	Arthropoda	Insecta	Diptera	Drosophilidae	GCA_004149445.1	2.0256e+08	NA	NA	NA	NA	NA	NA	NA	NA	NA	NA	NA	NA	NA	NA	NA	NA	NA	42812852	21.78	14.0282	28415590
Insecta	Drosophila_ananassae	7217	Arthropoda	Insecta	Diptera	Drosophilidae	GCA_003285975.3	185820000	NA	NA	NA	NA	NA	NA	NA	NA	NA	NA	NA	NA	NA	NA	NA	NA	NA	NA	NA	NA	NA
Insecta	Drosophila_bipectinata	42026	Arthropoda	Insecta	Diptera	Drosophilidae	GCA_000236285.2	195600000	NA	NA	NA	NA	NA	NA	NA	NA	NA	NA	NA	NA	NA	NA	NA	NA	NA	59580208	29.44	18.9501	37066315
Insecta	Drosophila_asahinai	154832	Arthropoda	Insecta	Diptera	Drosophilidae	GCA_008042795.1	2.34643e+08	NA	NA	NA	NA	NA	NA	NA	NA	NA	NA	NA	NA	NA	NA	NA	NA	NA	59842528	26.22	17.4982	41058297
Insecta	Drosophila_lacteicornis	67531	Arthropoda	Insecta	Diptera	Drosophilidae	GCA_008044355.1	244500000	NA	NA	NA	NA	NA	NA	NA	NA	NA	NA	NA	NA	NA	NA	NA	NA	NA	59519164	24.61	17.3014	42301869
Insecta	Drosophila_rufa	67533	Arthropoda	Insecta	Diptera	Drosophilidae	GCA_008044435.1	254280000	NA	NA	NA	NA	NA	NA	NA	NA	NA	NA	NA	NA	NA	NA	NA	NA	NA	72514560	28.83	19.523	49643122
Insecta	Drosophila_tani	137070	Arthropoda	Insecta	Diptera	Drosophilidae	GCA_008042535.1	195600000	NA	NA	NA	NA	NA	NA	NA	NA	NA	NA	NA	NA	NA	NA	NA	NA	NA	36982420	19.1	13.3803	26171887
Insecta	Drosophila_triauraria	67534	Arthropoda	Insecta	Diptera	Drosophilidae	GCA_014170255.2	244500000	NA	NA	NA	NA	NA	NA	NA	NA	NA	NA	NA	NA	NA	NA	NA	NA	NA	NA	NA	NA	NA
Insecta	Drosophila_pectinifera	359927	Arthropoda	Insecta	Diptera	Drosophilidae	GCA_008042775.1	293400000	NA	NA	NA	NA	NA	NA	NA	NA	NA	NA	NA	NA	NA	NA	NA	NA	NA	51782632	28.68	19.1074	56061029
Insecta	Drosophila_birchii	46829	Arthropoda	Insecta	Diptera	Drosophilidae	GCA_008042755.1	195600000	NA	NA	NA	NA	NA	NA	NA	NA	NA	NA	NA	NA	NA	NA	NA	NA	NA	36417256	18.82	12.5223	24493561
Insecta	Drosophila_mayri	137074	Arthropoda	Insecta	Diptera	Drosophilidae	GCA_008042485.1	254280000	NA	NA	NA	NA	NA	NA	NA	NA	NA	NA	NA	NA	NA	NA	NA	NA	NA	81845936	32.52	21.3244	54223635
Insecta	Drosophila_truncata	137078	Arthropoda	Insecta	Diptera	Drosophilidae	GCA_008042515.1	2.0904e+08	NA	NA	NA	NA	NA	NA	NA	NA	NA	NA	NA	NA	NA	NA	NA	NA	NA	42408884	20.89	13.0641	27309238
Insecta	Drosophila_bunnanda	244254	Arthropoda	Insecta	Diptera	Drosophilidae	GCA_008042815.1	215160000	NA	NA	NA	NA	NA	NA	NA	NA	NA	NA	NA	NA	NA	NA	NA	NA	NA	28920596	13.58	6.97614	15009860
Insecta	Drosophila_serrata	7274	Arthropoda	Insecta	Diptera	Drosophilidae	GCA_002093755.1	205380000	NA	NA	NA	NA	NA	NA	NA	NA	NA	NA	NA	NA	NA	NA	NA	NA	NA	NA	NA	NA	NA
Insecta	Drosophila_jambulina	111875	Arthropoda	Insecta	Diptera	Drosophilidae	GCA_008042695.1	205380000	NA	NA	NA	NA	NA	NA	NA	NA	NA	NA	NA	NA	NA	NA	NA	NA	NA	34568824	17.01	10.6045	21779566
Insecta	Drosophila_seguyi	73917	Arthropoda	Insecta	Diptera	Drosophilidae	GCA_008042675.1	215160000	NA	NA	NA	NA	NA	NA	NA	NA	NA	NA	NA	NA	NA	NA	NA	NA	NA	47496828	21.97	12.8287	27602329
Insecta	Drosophila_vulcana	132243	Arthropoda	Insecta	Diptera	Drosophilidae	GCA_008042555.1	224940000	NA	NA	NA	NA	NA	NA	NA	NA	NA	NA	NA	NA	NA	NA	NA	NA	NA	35862804	15.83	10.6912	24048812
Insecta	Drosophila_bocki	103765	Arthropoda	Insecta	Diptera	Drosophilidae	GCA_008042715.1	1.88834e+08	NA	NA	NA	NA	NA	NA	NA	NA	NA	NA	NA	NA	NA	NA	NA	NA	NA	26283516	14.07	9.6461	18215062
Insecta	Drosophila_kikkawai	30033	Arthropoda	Insecta	Diptera	Drosophilidae	GCA_000224215.2	205380000	NA	NA	NA	NA	NA	NA	NA	NA	NA	NA	NA	NA	NA	NA	NA	NA	NA	31035480	15.59	13.2507	27214325
Insecta	Drosophila_kanapiae	137072	Arthropoda	Insecta	Diptera	Drosophilidae	GCA_008042475.1	166260000	NA	NA	NA	NA	NA	NA	NA	NA	NA	NA	NA	NA	NA	NA	NA	NA	NA	17316148	9.4	5.98064	9943415
Insecta	Drosophila_biarmipes	125945	Arthropoda	Insecta	Diptera	Drosophilidae	GCA_005234255.1	195600000	NA	NA	NA	NA	NA	NA	NA	NA	NA	NA	NA	NA	NA	NA	NA	NA	NA	NA	NA	NA	NA
Insecta	Drosophila_suzukii	28584	Arthropoda	Insecta	Diptera	Drosophilidae	GCF_013340165.1	342300000	NA	NA	NA	NA	NA	NA	NA	NA	NA	NA	NA	NA	NA	NA	NA	NA	NA	NA	NA	NA	NA
Insecta	Drosophila_takahashii	29030	Arthropoda	Insecta	Diptera	Drosophilidae	GCA_000224235.2	195600000	NA	NA	NA	NA	NA	NA	NA	NA	NA	NA	NA	NA	NA	NA	NA	NA	NA	62428068	28.35	19.9323	38987607
Insecta	Drosophila_erecta	7220	Arthropoda	Insecta	Diptera	Drosophilidae	GCA_003286155.2	156480000	NA	NA	NA	NA	NA	NA	NA	NA	NA	NA	NA	NA	NA	NA	NA	NA	NA	NA	NA	NA	NA
Insecta	Drosophila_orena	7233	Arthropoda	Insecta	Diptera	Drosophilidae	GCA_005876975.1	273840000	NA	NA	NA	NA	NA	NA	NA	NA	NA	NA	NA	NA	NA	NA	NA	NA	NA	NA	NA	NA	NA
Insecta	Drosophila_mauritiana	7226	Arthropoda	Insecta	Diptera	Drosophilidae	GCA_004382145.1	146700000	NA	NA	NA	NA	NA	NA	NA	NA	NA	NA	NA	NA	NA	NA	NA	NA	NA	NA	NA	NA	NA
Insecta	Drosophila_sechellia	7238	Arthropoda	Insecta	Diptera	Drosophilidae	GCA_004382195.1	166260000	NA	NA	NA	NA	NA	NA	NA	NA	NA	NA	NA	NA	NA	NA	NA	NA	NA	NA	NA	NA	NA
Insecta	Drosophila_simulans	7240	Arthropoda	Insecta	Diptera	Drosophilidae	GCA_004382185.1	146700000	NA	NA	NA	NA	NA	NA	NA	NA	NA	NA	NA	NA	NA	NA	NA	NA	NA	NA	NA	NA	NA
Insecta	Drosophila_melanogaster	7227	Arthropoda	Insecta	Diptera	Drosophilidae	GCA_003401745.1	176040000	NA	NA	NA	NA	NA	NA	0.3	AnAge	0.00095	AnimalTraits	0.0256035	NA	7	AnAge	NA	NA	NA	NA	NA	NA	NA
Insecta	Drosophila_eugracilis	29029	Arthropoda	Insecta	Diptera	Drosophilidae	GCA_000236325.2	224940000	NA	NA	NA	NA	NA	NA	NA	NA	NA	NA	NA	NA	NA	NA	NA	NA	NA	30559868	16.06	10.9373	24602286
Insecta	Drosophila_ficusphila	30025	Arthropoda	Insecta	Diptera	Drosophilidae	GCA_000220665.2	185820000	NA	NA	NA	NA	NA	NA	NA	NA	NA	NA	NA	NA	NA	NA	NA	NA	NA	18088576	9.78	8.99782	16719758
Insecta	Drosophila_elegans	30023	Arthropoda	Insecta	Diptera	Drosophilidae	GCA_000224195.2	195600000	NA	NA	NA	NA	NA	NA	NA	NA	NA	NA	NA	NA	NA	NA	NA	NA	NA	43071900	20.79	13.2374	25892366
Insecta	Drosophila_azteca	7249	Arthropoda	Insecta	Diptera	Drosophilidae	GCA_005876895.1	195600000	NA	NA	NA	NA	NA	NA	NA	NA	NA	NA	NA	NA	NA	NA	NA	NA	NA	NA	NA	NA	NA
Insecta	Drosophila_persimilis	7234	Arthropoda	Insecta	Diptera	Drosophilidae	GCA_003286085.2	176040000	NA	NA	NA	NA	NA	NA	NA	NA	NA	NA	NA	NA	NA	NA	NA	NA	NA	NA	NA	NA	NA
Insecta	Drosophila_pseudoobscura	7237	Arthropoda	Insecta	Diptera	Drosophilidae	GCA_009870125.2	156480000	NA	NA	NA	NA	NA	NA	NA	NA	NA	NA	NA	NA	NA	NA	NA	NA	NA	38490108	19.42	13.6263	21322367
Insecta	Drosophila_bifasciata	7218	Arthropoda	Insecta	Diptera	Drosophilidae	GCA_009664405.1	195600000	NA	NA	NA	NA	NA	NA	NA	NA	NA	NA	NA	NA	NA	NA	NA	NA	NA	35002288	18.08	13.1868	25793432
Insecta	Drosophila_obscura	7282	Arthropoda	Insecta	Diptera	Drosophilidae	GCA_002217835.1	2.2595e+08	NA	NA	NA	NA	NA	NA	NA	NA	NA	NA	NA	NA	NA	NA	NA	NA	NA	57070660	25.98	18.1033	40904326
Insecta	Drosophila_guanche	7266	Arthropoda	Insecta	Diptera	Drosophilidae	GCA_900245975.1	1.76041e+08	NA	NA	NA	NA	NA	NA	NA	NA	NA	NA	NA	NA	NA	NA	NA	NA	NA	41427936	24.17	13.8989	24467762
Insecta	Scaptodrosophila_lebanonensis	7225	Arthropoda	Insecta	Diptera	Drosophilidae	GCA_003285725.2	215160000	NA	NA	NA	NA	NA	NA	NA	NA	NA	NA	NA	NA	NA	NA	NA	NA	NA	NA	NA	NA	NA
Insecta	Lucilia_cuprina	7375	Arthropoda	Insecta	Diptera	Calliphoridae	GCA_000699065.2	616140000	NA	NA	NA	NA	NA	NA	NA	NA	NA	NA	NA	NA	NA	NA	NA	NA	NA	154439084	33.96	18.8434	116101874
Insecta	Sarcophaga_peregrina	7386	Arthropoda	Insecta	Diptera	Sarcophagidae	GCA_014635995.1	6.84502e+08	NA	NA	NA	NA	NA	NA	NA	NA	NA	NA	NA	NA	NA	NA	NA	NA	NA	NA	NA	NA	NA
Insecta	Hermetia_illucens	343691	Arthropoda	Insecta	Diptera	Stratiomyidae	GCA_009835165.1	1154040000	NA	NA	NA	NA	NA	NA	NA	NA	NA	NA	NA	NA	NA	NA	NA	NA	NA	NA	NA	NA	NA
Insecta	Proctacanthus_coquilletti	1717472	Arthropoda	Insecta	Diptera	Asilidae	GCA_001932985.1	2.58676e+08	NA	NA	NA	NA	NA	NA	NA	NA	NA	NA	NA	NA	NA	NA	NA	NA	NA	36759512	14.49	11.9419	30890744
Insecta	Contarinia_nasturtii	265458	Arthropoda	Insecta	Diptera	Cecidomyiidae	GCA_009176525.2	2.30811e+08	NA	NA	NA	NA	NA	NA	NA	NA	NA	NA	NA	NA	NA	NA	NA	NA	NA	30821416	13.68	12.4338	28698646
Insecta	Sitodiplosis_mosellana	263140	Arthropoda	Insecta	Diptera	Cecidomyiidae	GCA_009176505.1	2.58527e+08	NA	NA	NA	NA	NA	NA	NA	NA	NA	NA	NA	NA	NA	NA	NA	NA	NA	NA	NA	NA	NA
Insecta	Ctenocephalides_felis	7515	Arthropoda	Insecta	Siphonaptera	Pulicidae	GCA_003426905.1	459660000	NA	NA	NA	NA	NA	NA	NA	NA	NA	NA	NA	NA	NA	NA	NA	NA	NA	NA	NA	NA	NA
Insecta	Aethina_tumida	116153	Arthropoda	Insecta	Coleoptera	Nitidulidae	GCA_001937115.1	2.89463e+08	NA	NA	NA	NA	NA	NA	NA	NA	NA	NA	NA	NA	NA	NA	NA	NA	NA	53364020	18.63	12.3593	35775662
Insecta	Anoplophora_glabripennis	217634	Arthropoda	Insecta	Coleoptera	Cerambycidae	GCA_000390285.2	8.61473e+08	NA	NA	NA	NA	NA	NA	NA	NA	NA	NA	NA	NA	NA	NA	NA	NA	NA	433581724	50.88	32.0549	276144153
Insecta	Callosobruchus_maculatus	64391	Arthropoda	Insecta	Coleoptera	Chrysomelidae	GCA_900659725.1	1212720000	NA	NA	NA	NA	NA	NA	NA	NA	NA	NA	NA	NA	NA	NA	NA	NA	NA	NA	NA	NA	NA
Insecta	Ophraella_communa	38162	Arthropoda	Insecta	Coleoptera	Chrysomelidae	GCA_902651945.1	586800000	NA	NA	NA	NA	NA	NA	NA	NA	NA	NA	NA	NA	NA	NA	NA	NA	NA	NA	NA	NA	NA
Insecta	Listronotus_bonariensis	292309	Arthropoda	Insecta	Coleoptera	Curculionidae	GCA_014170235.1	1.35224e+09	NA	NA	NA	NA	NA	NA	NA	NA	NA	NA	NA	NA	NA	NA	NA	NA	NA	NA	NA	NA	NA
Insecta	Sitophilus_oryzae	7048	Arthropoda	Insecta	Coleoptera	Curculionidae	GCA_002938485.2	9.38447e+08	NA	NA	NA	NA	NA	NA	NA	NA	NA	NA	NA	NA	NA	NA	NA	NA	NA	617198496	66.34	39.5708	371351098
Insecta	Cryptolaemus_montrouzieri	559131	Arthropoda	Insecta	Coleoptera	Coccinellidae	GCA_013387265.1	782400000	NA	NA	NA	NA	NA	NA	NA	NA	NA	NA	NA	NA	NA	NA	NA	NA	NA	NA	NA	NA	NA
Insecta	Harmonia_axyridis	115357	Arthropoda	Insecta	Coleoptera	Coccinellidae	GCA_011033045.1	459660000	NA	NA	NA	NA	NA	NA	NA	NA	NA	NA	NA	NA	NA	NA	NA	NA	NA	159418292	34.92	18.2002	83658834
Insecta	Propylea_japonica	158624	Arthropoda	Insecta	Coleoptera	Coccinellidae	GCA_013421045.1	1.03609e+09	NA	NA	NA	NA	NA	NA	NA	NA	NA	NA	NA	NA	NA	NA	NA	NA	NA	631110240	61.33	35.8494	371433299
Insecta	Hycleus_cichorii	1270216	Arthropoda	Insecta	Coleoptera	Meloidae	GCA_013841215.1	1.25852e+08	NA	NA	NA	NA	NA	NA	NA	NA	NA	NA	NA	NA	NA	NA	NA	NA	NA	75304780	60.35	42.4709	53450432
Insecta	Hycleus_phaleratus	1248972	Arthropoda	Insecta	Coleoptera	Meloidae	GCA_013841185.1	1.15812e+08	NA	NA	NA	NA	NA	NA	NA	NA	NA	NA	NA	NA	NA	NA	NA	NA	NA	73427776	63.85	34.8515	40362079
Insecta	Marronus_borbonicus	2654888	Arthropoda	Insecta	Coleoptera	Scarabaeidae	GCA_902655005.2	5.40147e+08	NA	NA	NA	NA	NA	NA	NA	NA	NA	NA	NA	NA	NA	NA	NA	NA	NA	122620916	22.86	17.9548	96982234
Insecta	Oryctes_borbonicus	1629725	Arthropoda	Insecta	Coleoptera	Scarabaeidae	GCA_902654985.2	5.24147e+08	NA	NA	NA	NA	NA	NA	NA	NA	NA	NA	NA	NA	NA	NA	NA	NA	NA	85273384	16.38	10.0461	52656322
Insecta	Trypoxylus_dichotomus	273928	Arthropoda	Insecta	Coleoptera	Scarabaeidae	GCA_014905495.1	9.00752e+08	NA	NA	NA	NA	NA	NA	NA	NA	NA	NA	NA	NA	NA	NA	NA	NA	NA	NA	NA	NA	NA
Insecta	Protaetia_brevitarsis	348688	Arthropoda	Insecta	Coleoptera	Scarabaeidae	GCA_004143645.1	1.39033e+09	NA	NA	NA	NA	NA	NA	NA	NA	NA	NA	NA	NA	NA	NA	NA	NA	NA	761601744	55.16	28.6891	398871721
Insecta	Nicrophorus_vespilloides	110193	Arthropoda	Insecta	Coleoptera	Silphidae	GCA_001412225.1	2.42174e+08	NA	NA	NA	NA	NA	NA	NA	NA	NA	NA	NA	NA	NA	NA	NA	NA	NA	39357256	16.43	12.1368	29392087
Insecta	Photinus_pyralis	7054	Arthropoda	Insecta	Coleoptera	Lampyridae	GCA_008802855.1	5.76512e+08	NA	NA	NA	NA	NA	NA	NA	NA	NA	NA	NA	NA	NA	NA	NA	NA	NA	NA	NA	NA	NA
Insecta	Andricus_quercuslanigera	2302820	Arthropoda	NA	Hymenoptera	Cynipidae	GCA_010014905.1	1.62377e+09	NA	NA	NA	NA	NA	NA	NA	NA	NA	NA	NA	NA	NA	NA	NA	NA	NA	859964220	53.33	20.9392	340004708
Insecta	Leptopilina_boulardi	63433	Arthropoda	Insecta	Hymenoptera	Figitidae	GCA_011634795.1	361860000	NA	NA	NA	NA	NA	NA	NA	NA	NA	NA	NA	NA	NA	NA	NA	NA	NA	222812252	61.84	46.9989	170070219
Insecta	Nasonia_vitripennis	7425	Arthropoda	Insecta	Hymenoptera	Pteromalidae	GCA_009193385.2	332520000	NA	NA	NA	NA	NA	NA	NA	NA	NA	NA	NA	NA	NA	NA	NA	NA	NA	125649284	37.94	33.5674	111618251
Insecta	Trichogramma_brassicae	86971	Arthropoda	Insecta	Hymenoptera	Trichogrammatidae	GCA_902806795.1	244500000	NA	NA	NA	NA	NA	NA	NA	NA	NA	NA	NA	NA	NA	NA	NA	NA	NA	60343248	24.85	17.9924	43991474
Insecta	Trichogramma_pretiosum	7493	Arthropoda	Insecta	Hymenoptera	Trichogrammatidae	GCA_000599845.3	185820000	NA	NA	NA	NA	NA	NA	NA	NA	NA	NA	NA	NA	NA	NA	NA	NA	NA	23739788	12.91	8.99098	16707044
Insecta	Aphidius_gifuensis	684658	Arthropoda	Insecta	Hymenoptera	Braconidae	GCA_014905175.1	1.95783e+08	NA	NA	NA	NA	NA	NA	NA	NA	NA	NA	NA	NA	NA	NA	NA	NA	NA	50250464	25.84	15.5076	30361368
Insecta	Chelonus_insularis	460826	Arthropoda	Insecta	Hymenoptera	Braconidae	GCA_013357705.1	1.70108e+08	NA	NA	NA	NA	NA	NA	NA	NA	NA	NA	NA	NA	NA	NA	NA	NA	NA	13757940	8.19	4.81838	8196425
Insecta	Campoletis_sonorensis	7416	Arthropoda	Insecta	Hymenoptera	Ichneumonidae	GCA_013761285.1	3.15725e+08	NA	NA	NA	NA	NA	NA	NA	NA	NA	NA	NA	NA	NA	NA	NA	NA	NA	45303632	14.44	12.41	39181515
Insecta	Apis_cerana_cerana	94128	Arthropoda	Insecta	Hymenoptera	Apidae	GCA_011100585.1	2.6684e+08	NA	NA	NA	NA	NA	NA	NA	NA	NA	NA	NA	NA	NA	NA	NA	NA	NA	NA	NA	NA	NA
Insecta	Apis_mellifera	7460	Arthropoda	Insecta	Hymenoptera	Apidae	GCA_003254395.2	234720000	NA	NA	NA	NA	NA	NA	8	AnAge	0.084	AnimalTraits	NA	NA	NA	NA	NA	NA	NA	11827824	5.07	3.75121	8804850
Insecta	Apis_mellifera_mellifera	44477	Arthropoda	Insecta	Hymenoptera	Apidae	GCA_003314205.1	2.80598e+08	NA	NA	NA	NA	NA	NA	NA	NA	NA	NA	NA	NA	NA	NA	NA	NA	NA	NA	NA	NA	NA
Insecta	Bombus_bifarius	103933	Arthropoda	Insecta	Hymenoptera	Apidae	GCA_011952205.1	3.28726e+08	NA	NA	NA	NA	NA	NA	NA	NA	NA	NA	NA	NA	NA	NA	NA	NA	NA	71719884	21.97	17.0102	55916899
Insecta	Bombus_vancouverensis_nearcticus	2705178	Arthropoda	Insecta	Hymenoptera	Apidae	GCA_011952275.1	3.47303e+08	NA	NA	NA	NA	NA	NA	NA	NA	NA	NA	NA	NA	NA	NA	NA	NA	NA	84691376	24.55	17.6779	61395955
Insecta	Bombus_impatiens	132113	Arthropoda	Insecta	Hymenoptera	Apidae	GCA_000188095.4	508560000	NA	NA	NA	NA	NA	NA	NA	NA	0.2795	AnimalTraits	NA	NA	NA	NA	NA	NA	NA	196510376	39.01	25.8961	131697306
Insecta	Bombus_picipes	309970	Arthropoda	Insecta	Hymenoptera	Apidae	GCA_014737485.1	3.13238e+08	NA	NA	NA	NA	NA	NA	NA	NA	NA	NA	NA	NA	NA	NA	NA	NA	NA	118206392	37.89	26.6782	83566204
Insecta	Bombus_ignitus	130704	Arthropoda	Insecta	Hymenoptera	Apidae	GCA_014825875.1	2.99412e+08	NA	NA	NA	NA	NA	NA	NA	NA	NA	NA	NA	NA	NA	NA	NA	NA	NA	73099696	24.51	19.1958	57474648
Insecta	Bombus_terrestris	30195	Arthropoda	Insecta	Hymenoptera	Apidae	GCA_000214255.1	625920000	NA	NA	NA	NA	NA	NA	NA	NA	NA	NA	NA	NA	NA	NA	NA	NA	NA	NA	NA	NA	NA
Insecta	Bombus_polaris	130708	Arthropoda	Insecta	Hymenoptera	Apidae	GCA_014737335.1	3.03316e+08	NA	NA	NA	NA	NA	NA	NA	NA	NA	NA	NA	NA	NA	NA	NA	NA	NA	99731824	33.02	26.0785	79100318
Insecta	Bombus_breviceps	395515	Arthropoda	Insecta	Hymenoptera	Apidae	GCA_014825925.1	3.06141e+08	NA	NA	NA	NA	NA	NA	NA	NA	NA	NA	NA	NA	NA	NA	NA	NA	NA	100042020	32.81	18.7536	57412390
Insecta	Bombus_pyrosoma	396416	Arthropoda	Insecta	Hymenoptera	Apidae	GCA_014825855.1	3.14226e+08	NA	NA	NA	NA	NA	NA	NA	NA	NA	NA	NA	NA	NA	NA	NA	NA	NA	91145132	29.13	20.3381	63907538
Insecta	Bombus_cullumanus	2562068	Arthropoda	Insecta	Hymenoptera	Apidae	GCA_014737535.1	3.04764e+08	NA	NA	NA	NA	NA	NA	NA	NA	NA	NA	NA	NA	NA	NA	NA	NA	NA	105209584	34.66	21.021	64064398
Insecta	Bombus_sibiricus	421273	Arthropoda	Insecta	Hymenoptera	Apidae	GCA_014737505.1	3.23443e+08	NA	NA	NA	NA	NA	NA	NA	NA	NA	NA	NA	NA	NA	NA	NA	NA	NA	117541000	36.49	17.7993	57570729
Insecta	Bombus_consobrinus	130686	Arthropoda	Insecta	Hymenoptera	Apidae	GCA_014737455.1	3.07284e+08	NA	NA	NA	NA	NA	NA	NA	NA	NA	NA	NA	NA	NA	NA	NA	NA	NA	98802348	32.29	23.1969	71280510
Insecta	Bombus_difficillimus	395520	Arthropoda	Insecta	Hymenoptera	Apidae	GCA_014737525.1	3.00617e+08	NA	NA	NA	NA	NA	NA	NA	NA	NA	NA	NA	NA	NA	NA	NA	NA	NA	118304328	39.52	22.0192	66193375
Insecta	Bombus_haemorrhoidalis	207636	Arthropoda	Insecta	Hymenoptera	Apidae	GCA_014825975.1	2.9696e+08	NA	NA	NA	NA	NA	NA	NA	NA	NA	NA	NA	NA	NA	NA	NA	NA	NA	128271984	43.38	36.4931	108369761
Insecta	Bombus_opulentus	2024865	Arthropoda	Insecta	Hymenoptera	Apidae	GCA_014737405.1	2.99157e+08	NA	NA	NA	NA	NA	NA	NA	NA	NA	NA	NA	NA	NA	NA	NA	NA	NA	97854072	32.85	25.6994	76881342
Insecta	Bombus_skorikovi	395565	Arthropoda	Insecta	Hymenoptera	Apidae	GCA_014737355.1	2.98775e+08	NA	NA	NA	NA	NA	NA	NA	NA	NA	NA	NA	NA	NA	NA	NA	NA	NA	81608776	27.43	21.7163	64882861
Insecta	Bombus_turneri	686820	Arthropoda	Insecta	Hymenoptera	Apidae	GCA_014825825.1	3.00074e+08	NA	NA	NA	NA	NA	NA	NA	NA	NA	NA	NA	NA	NA	NA	NA	NA	NA	61286788	20.51	17.1327	51410819
Insecta	Bombus_soroeensis	184059	Arthropoda	Insecta	Hymenoptera	Apidae	GCA_014737365.1	3.00633e+08	NA	NA	NA	NA	NA	NA	NA	NA	NA	NA	NA	NA	NA	NA	NA	NA	NA	98640440	32.95	17.0252	51183281
Insecta	Bombus_confusus	217217	Arthropoda	Insecta	Hymenoptera	Apidae	GCA_014737475.1	2.9522e+08	NA	NA	NA	NA	NA	NA	NA	NA	NA	NA	NA	NA	NA	NA	NA	NA	NA	195357456	66.45	41.111	121368014
Insecta	Bombus_superbus	1869276	Arthropoda	Insecta	Hymenoptera	Apidae	GCA_014737385.1	2.84374e+08	NA	NA	NA	NA	NA	NA	NA	NA	NA	NA	NA	NA	NA	NA	NA	NA	NA	64319408	22.71	15.7197	44702732
Insecta	Bombus_waltoni	395577	Arthropoda	Insecta	Hymenoptera	Apidae	GCA_014737395.1	2.85596e+08	NA	NA	NA	NA	NA	NA	NA	NA	NA	NA	NA	NA	NA	NA	NA	NA	NA	49299980	17.33	15.7403	44953519
Insecta	Frieseomelitta_varia	561572	Arthropoda	Insecta	Hymenoptera	Apidae	GCA_011392965.1	459660000	NA	NA	NA	NA	NA	NA	NA	NA	NA	NA	NA	NA	NA	NA	NA	NA	NA	124356624	27.33	19.142	87988137
Insecta	Megachile_rotundata	143995	Arthropoda	Insecta	Hymenoptera	Megachilidae	GCA_000220905.1	811740000	NA	NA	NA	NA	NA	NA	NA	NA	NA	NA	NA	NA	NA	NA	NA	NA	NA	420797596	52.33	33.0565	268332712
Insecta	Osmia_bicornis_bicornis	1437191	Arthropoda	Insecta	Hymenoptera	Megachilidae	GCA_004153925.1	2.60713e+08	NA	NA	NA	NA	NA	NA	NA	NA	NA	NA	NA	NA	NA	NA	NA	NA	NA	128324744	49.47	28.5782	74507292
Insecta	Osmia_lignaria	473952	Arthropoda	Insecta	Hymenoptera	Megachilidae	GCA_012274295.1	2.20144e+08	NA	NA	NA	NA	NA	NA	NA	NA	NA	NA	NA	NA	NA	NA	NA	NA	NA	NA	NA	NA	NA
Insecta	Cyphomyrmex_costatus	456900	Arthropoda	Insecta	Hymenoptera	Formicidae	GCA_001594065.1	3.69311e+08	NA	NA	NA	NA	NA	NA	NA	NA	NA	NA	NA	NA	NA	NA	NA	NA	NA	80407684	22.01	15.7169	58044258
Insecta	Trachymyrmex_zeteki	64791	Arthropoda	Insecta	Hymenoptera	Formicidae	GCA_001594055.1	3.30164e+08	NA	NA	NA	NA	NA	NA	NA	NA	0.0021265	AnimalTraits	NA	NA	NA	NA	NA	NA	NA	56054012	17.15	10.2701	33908203
Insecta	Vespa_mandarinia	7446	Arthropoda	Insecta	Hymenoptera	Vespidae	GCA_014083535.1	3.0564e+08	NA	NA	NA	NA	NA	NA	NA	NA	NA	NA	NA	NA	NA	NA	NA	NA	NA	NA	NA	NA	NA
Insecta	Vespula_germanica	30212	Arthropoda	Insecta	Hymenoptera	Vespidae	GCA_014466195.1	224940000	NA	NA	NA	NA	NA	NA	NA	NA	NA	NA	NA	NA	NA	NA	NA	NA	NA	34708924	15.53	12.1614	27355812
Insecta	Vespula_pensylvanica	30213	Arthropoda	Insecta	Hymenoptera	Vespidae	GCA_014466175.1	2.22926e+08	NA	NA	NA	NA	NA	NA	NA	NA	NA	NA	NA	NA	NA	NA	NA	NA	NA	30854268	13.93	10.6048	23640863
Insecta	Orussus_abietinus	222816	Arthropoda	Insecta	Hymenoptera	Orussidae	GCA_000612105.2	2.31432e+08	NA	NA	NA	NA	NA	NA	NA	NA	NA	NA	NA	NA	NA	NA	NA	NA	NA	79467460	34.71	27.552	63764258
Insecta	Neodiprion_lecontei	441921	Arthropoda	Insecta	Hymenoptera	Diprionidae	GCA_001263575.2	2.96038e+08	NA	NA	NA	NA	NA	NA	NA	NA	NA	NA	NA	NA	NA	NA	NA	NA	NA	37376212	12.76	7.59165	22474159
Insecta	Aphis_glycines	307491	Arthropoda	Insecta	Hemiptera	Aphididae	GCA_009928515.1	3.72747e+08	NA	NA	NA	NA	NA	NA	NA	NA	NA	NA	NA	NA	NA	NA	NA	NA	NA	NA	NA	NA	NA
Insecta	Melanaphis_sacchari	742174	Arthropoda	Insecta	Hemiptera	Aphididae	GCA_002803265.2	3.69256e+08	NA	NA	NA	NA	NA	NA	NA	NA	NA	NA	NA	NA	NA	NA	NA	NA	NA	29521760	8.05	6.2807	23191903
Insecta	Myzus_persicae	13164	Arthropoda	Insecta	Hemiptera	Aphididae	GCA_001856785.1	312960000	NA	NA	NA	NA	NA	NA	NA	NA	NA	NA	NA	NA	NA	NA	NA	NA	NA	54656864	17.65	14.0865	44085026
Insecta	Sitobion_miscanthi	44668	Arthropoda	Insecta	Hemiptera	Aphididae	GCA_008086715.1	4.87361e+08	NA	NA	NA	NA	NA	NA	NA	NA	NA	NA	NA	NA	NA	NA	NA	NA	NA	129241692	26.7	16.2148	79024492
Insecta	Pentalonia_nigronervosa	693967	Arthropoda	Insecta	Hemiptera	Aphididae	GCA_014851325.1	4.59972e+08	NA	NA	NA	NA	NA	NA	NA	NA	NA	NA	NA	NA	NA	NA	NA	NA	NA	141426032	30.88	21.6362	99520636
Insecta	Eriosoma_lanigerum	133082	Arthropoda	Insecta	Hemiptera	Pemphigidae	GCA_013282895.1	4.1113e+08	NA	NA	NA	NA	NA	NA	NA	NA	NA	NA	NA	NA	NA	NA	NA	NA	NA	84354048	20.66	13.4957	55484836
Insecta	Cinara_cedri	506608	Arthropoda	Insecta	Hemiptera	Lachnidae	GCA_902439185.1	4.85171e+08	NA	NA	NA	NA	NA	NA	NA	NA	NA	NA	NA	NA	NA	NA	NA	NA	NA	138497228	28.86	21.0211	101988303
Insecta	Phenacoccus_solenopsis	483260	Arthropoda	Insecta	Hemiptera	Pseudococcidae	GCA_009761765.1	3.59896e+08	NA	NA	NA	NA	NA	NA	NA	NA	NA	NA	NA	NA	NA	NA	NA	NA	NA	91886340	25.71	13.2417	47656263
Insecta	Bemisia_tabaci	7038	Arthropoda	Insecta	Hemiptera	Aleyrodidae	GCA_001854935.1	665040000	NA	NA	NA	NA	NA	NA	NA	NA	NA	NA	NA	NA	NA	NA	NA	NA	NA	227941352	34.52	16.5125	109814739
Insecta	Trialeurodes_vaporariorum	88556	Arthropoda	Insecta	Hemiptera	Aleyrodidae	GCA_011764245.1	9.58943e+08	NA	NA	NA	NA	NA	NA	NA	NA	NA	NA	NA	NA	NA	NA	NA	NA	NA	428198764	44.96	23.3894	224290964
Insecta	Apolygus_lucorum	248454	Arthropoda	Insecta	Hemiptera	Miridae	GCA_009739505.2	880200000	NA	NA	NA	NA	NA	NA	NA	NA	NA	NA	NA	NA	NA	NA	NA	NA	NA	497903416	56.99	36.5726	321912338
Insecta	Cimex_lectularius	79782	Arthropoda	Insecta	Hemiptera	Cimicidae	GCA_000648675.3	6.24105e+08	NA	NA	NA	NA	NA	NA	NA	NA	NA	NA	NA	NA	NA	NA	NA	NA	NA	285919392	46.31	36.7521	229372026
Insecta	Orius_insidiosus	83647	Arthropoda	Insecta	Hemiptera	Anthocoridae	GCA_014119065.1	4.04016e+08	NA	NA	NA	NA	NA	NA	NA	NA	NA	NA	NA	NA	NA	NA	NA	NA	NA	NA	NA	NA	NA
Insecta	Triatoma_infestans	30076	Arthropoda	Insecta	Hemiptera	Reduviidae	GCA_011037195.1	1603920000	NA	NA	NA	NA	NA	NA	NA	NA	NA	NA	NA	NA	NA	NA	NA	NA	NA	783525760	49.19	20.8221	333969888
Insecta	Euschistus_heros	437493	Arthropoda	Insecta	Hemiptera	Pentatomidae	GCA_003667255.1	1.6097e+09	NA	NA	NA	NA	NA	NA	NA	NA	NA	NA	NA	NA	NA	NA	NA	NA	NA	NA	NA	NA	NA
Insecta	Laodelphax_striatellus	195883	Arthropoda	Insecta	Hemiptera	Delphacidae	GCA_003335185.2	508560000	NA	NA	NA	NA	NA	NA	NA	NA	NA	NA	NA	NA	NA	NA	NA	NA	NA	99942752	19.82	12.8129	65161296
Insecta	Thrips_palmi	161013	Arthropoda	Insecta	Thysanoptera	Thripidae	GCA_012932325.1	2.93682e+08	NA	NA	NA	NA	NA	NA	NA	NA	NA	NA	NA	NA	NA	NA	NA	NA	NA	NA	NA	NA	NA
Insecta	Blattella_germanica	6973	Arthropoda	Insecta	Blattodea	Ectobiidae	GCA_000762945.2	1956000000	NA	NA	NA	NA	NA	NA	NA	NA	NA	NA	NA	NA	NA	NA	NA	NA	NA	955593248	49.39	26.4415	517195031
Insecta	Cryptotermes_secundus	105785	Arthropoda	Insecta	Blattodea	Kalotermitidae	GCA_002891405.2	1.23907e+09	NA	NA	NA	NA	NA	NA	NA	NA	NA	NA	NA	NA	NA	NA	NA	NA	NA	578260376	47.03	20.9534	259627852
Insecta	Periplaneta_americana	6978	Arthropoda	Insecta	Blattodea	Blattidae	GCA_002939525.1	3334980000	NA	NA	NA	NA	NA	NA	NA	NA	0.574	AnimalTraits	0.00267725	NA	NA	NA	NA	NA	NA	2054060780	62.02	28.3443	945277794
Insecta	Ephemera_danica	1049336	Arthropoda	Insecta	Ephemeroptera	Ephemeridae	GCA_000507165.2	5.79945e+08	NA	NA	NA	NA	NA	NA	NA	NA	NA	NA	NA	NA	NA	NA	NA	NA	NA	164398276	28.65	16.8416	97671800
Insecta	Ladona_fulva	123851	Arthropoda	Insecta	Odonata	Libellulidae	GCA_000376725.2	1.40692e+09	NA	NA	NA	NA	NA	NA	NA	NA	NA	NA	NA	NA	NA	NA	NA	NA	NA	559436064	40.19	30.7038	431978412
Insecta	Rhinocypha_anisoptera	2487776	Arthropoda	Insecta	Odonata	Chlorocyphidae	GCA_011762765.1	2.27132e+09	NA	NA	NA	NA	NA	NA	NA	NA	NA	NA	NA	NA	NA	NA	NA	NA	NA	772047556	34.22	25.416	577276940
