# Supplementary material for: Effective population size does not explain long-term variation in genome size and transposable element content in animals
Source: eLife. 2025 Jul 18;13:RP100574. doi: 10.7554/eLife.100574 (PMC12274066; doi:10.7554/eLife.100574)
Supplement: Table 3—source data 1. — These are the original values used to infer PIC correlations. [file elife-100574-table3-data1.xlsx]

## Sheet: Table2_Sourcedata1
Clade	Species	TaxId	Phylum	Class	Order	Family	Accession_assembly	BUSCO_Duplicate	Genome_size	MaxLongevity_y	Source_MaxLongevity	Mass_g	Source_mass	MaxLongevity_y_log	Mass_g_log	n_markers_phylter_noshortbr	dN_CM_phylter_noshortbr	dS_CM_phylter_noshortbr	dNdS_CM_phylter_noshortbr	n_markers_trimmed	dN_CM_phylter_noshortbr_trimmed	dS_CM_phylter_noshortbr_trimmed	dNdS_CM_phylter_noshortbr_trimmed	brlen_coevol_gcpoor	dS_coevol_gcpoor	dNdS_coevol_gcpoor	brlen_coevol_gcrich	dS_coevol_gcrich	dNdS_coevol_gcrich	Overall_repeat_bp	Overall_repeat_gsperc	DNA_bp	DNA_gsperc	RC_bp	RC_gsperc	LTR_bp	LTR_gsperc	PLE_bp	PLE_gsperc	LINE_bp	LINE_gsperc	SINE_bp	SINE_gsperc	Retroposon_bp	Retroposon_gsperc	Unknown_bp	Unknown_gsperc	Other_bp	Other_gsperc
Actinopteri	Acipenser_ruthenus	7906	Chordata	Actinopteri	Acipenseriformes	Acipenseridae	GCA_010645085.1	69.2	1819080000	46.1	AnAge	8800	AnAge	3.83081	9.08251	243	0.162268	1.64602	0.0985817	267	0.0910893	0.955089	0.0953725	NA	NA	NA	NA	NA	NA	NA	NA	NA	NA	NA	NA	NA	NA	NA	NA	NA	NA	NA	NA	NA	NA	NA	NA	NA	NA
Actinopteri	Alosa_alosa	278164	Chordata	Actinopteri	Clupeiformes	Clupeidae	GCA_017589495.1	3.4	1.04017e+09	10	AnAge	2200	AnAge	2.30259	7.69621	750	0.0728107	0.835773	0.0871179	847	0.0716276	0.851057	0.0841631	0.399485	0.617282	0.101877	0.382702	0.672561	0.0666301	271271996	26.26	22169720	2.14	1543580	0.14	5604996	0.54	2076364	0.2	17471428	1.69	3306356	0.32	32448	NA	211585484	20.48	7481620	0.72
Actinopteri	Coilia_nasus	365059	Chordata	Actinopteri	Clupeiformes	Engraulidae	GCA_007927625.1	3.1	9.88808e+08	NA	NA	NA	NA	NA	NA	716	0.0797107	0.90025	0.0885429	807	0.077442	0.910644	0.0850409	0.399485	0.65441	0.140927	0.382702	0.704167	0.0727599	287107128	29.27	30609940	3.12	3459748	0.35	11665908	1.18	442896	0.04	21197440	2.16	2848464	0.29	390736	0.03	212823184	21.69	3668812	0.37
Actinopteri	Denticeps_clupeoides	299321	Chordata	Actinopteri	Clupeiformes	Denticipitidae	GCA_900700375.2	8.5	6.92591e+08	NA	NA	NA	NA	NA	NA	732	0.138415	1.67476	0.0826476	829	0.135218	1.70922	0.0791109	0.774449	0.76567	0.102934	0.767627	0.757437	0.0614366	125074688	18.18	18225672	2.65	28252	NA	4177632	0.6	144044	0.02	9641632	1.4	8029888	1.16	255948	0.03	77097696	11.21	7473924	1.08
Actinopteri	Ameiurus_melas	219545	Chordata	Actinopteri	Siluriformes	Ictaluridae	GCA_012411365.1	2.7	1075800000	10	AnAge	1995.5	AnAge	2.30259	7.59865	786	0.0232446	0.176216	0.13191	890	0.0228167	0.17897	0.127489	0.066323	0.836513	0.210303	0.0705192	0.905458	0.0968678	NA	NA	NA	NA	NA	NA	NA	NA	NA	NA	NA	NA	NA	NA	NA	NA	NA	NA	NA	NA
Actinopteri	Ictalurus_punctatus	7998	Chordata	Actinopteri	Siluriformes	Ictaluridae	GCA_001660625.2	6	1026900000	16	AnAge	13732.5	AnAge	2.77259	9.52752	755	0.0171914	0.123743	0.138929	863	0.0170465	0.129454	0.13168	0.066323	0.578366	0.204719	0.0705192	0.581822	0.0998185	NA	NA	NA	NA	NA	NA	NA	NA	NA	NA	NA	NA	NA	NA	NA	NA	NA	NA	NA	NA
Actinopteri	Pangasianodon_hypophthalmus	310915	Chordata	Actinopteri	Siluriformes	Pangasiidae	GCA_009078355.1	2.5	9.24436e+08	NA	NA	44000	FishBase	NA	10.6919	796	0.0314401	0.242329	0.129741	901	0.030781	0.245972	0.12514	0.213745	0.356978	0.183271	0.206009	0.397869	0.0991333	NA	NA	NA	NA	NA	NA	NA	NA	NA	NA	NA	NA	NA	NA	NA	NA	NA	NA	NA	NA
Actinopteri	Silurus_meridionalis	175797	Chordata	Actinopteri	Siluriformes	Siluridae	GCA_014805685.1	2	9.04594e+08	NA	NA	10800	FishBase	NA	9.2873	787	0.0717093	0.703425	0.101943	892	0.0698898	0.710808	0.0983245	0.249758	0.919033	0.143137	0.251424	0.988562	0.0874135	249910208	27.82	65700688	7.31	857272	0.09	16473068	1.83	135448	0.01	29146400	3.24	2296432	0.25	189040	0.02	130299308	14.5	4812552	0.53
Actinopteri	Bagarius_yarrelli	175774	Chordata	Actinopteri	Siluriformes	Sisoridae	GCA_005784505.1	1.7	6.96692e+08	NA	NA	NA	NA	NA	NA	784	0.0807535	0.824401	0.0979541	886	0.0789448	0.835247	0.0945166	0.3106	0.9308	0.136693	0.304125	0.926808	0.0735087	135388572	19.6	31798652	4.6	38680	NA	6592824	0.95	25580	NA	17627876	2.55	5166836	0.74	95360	0.01	67487976	9.77	6554788	0.94
Actinopteri	Beaufortia_kweichowensis	241442	Chordata	Actinopteri	Cypriniformes	Gastromyzontidae	GCA_019155185.1	2.6	5.48741e+08	NA	NA	NA	NA	NA	NA	796	0.0587259	0.525121	0.111833	902	0.0576636	0.528846	0.109037	0.324814	0.47706	0.17332	0.321528	0.495086	0.0986367	99229884	18.21	14227104	2.61	822840	0.15	8677100	1.59	3976	NA	8054032	1.47	409480	0.07	16496	NA	65345304	11.99	1673552	0.3
Actinopteri	Triplophysa_dalaica	1582913	Chordata	Actinopteri	Cypriniformes	Nemacheilidae	GCA_015846415.1	2.3	7.41616e+08	NA	NA	NA	NA	NA	NA	781	0.028973	0.19731	0.14684	887	0.0285228	0.198378	0.14378	0.0919132	0.682731	0.220295	0.0998559	0.618238	0.112987	224396044	30.46	53323948	7.24	2695788	0.36	19866244	2.69	144280	0.01	16576068	2.25	1022788	0.13	317888	0.04	127724292	17.34	2724748	0.36
Actinopteri	Triplophysa_siluroides	422203	Chordata	Actinopteri	Cypriniformes	Nemacheilidae	GCA_006030095.1	2.5	1075800000	NA	NA	1500	FishBase	NA	7.31322	780	0.0242516	0.146812	0.165188	885	0.0243107	0.152131	0.159801	0.0919132	0.428108	0.213797	0.0998559	0.403588	0.137828	318956196	29.97	64799964	6.08	3408968	0.32	29787596	2.79	54408	NA	18150892	1.7	1652880	0.15	257528	0.02	195979176	18.41	4864784	0.45
Actinopteri	Myxocyprinus_asiaticus	70543	Chordata	Actinopteri	Cypriniformes	Catostomidae	GCA_019703515.1	61.2	2689500000	NA	NA	NA	NA	NA	NA	325	0.0775164	0.69169	0.112068	356	0.0764421	0.695755	0.109869	NA	NA	NA	NA	NA	NA	NA	NA	NA	NA	NA	NA	NA	NA	NA	NA	NA	NA	NA	NA	NA	NA	NA	NA	NA	NA
Actinopteri	Carassius_auratus	7957	Chordata	Actinopteri	Cypriniformes	Cyprinidae	GCA_003368295.1	64.6	2.20939e+09	41	AnAge	NA	NA	3.71357	NA	302	0.0577503	0.462306	0.124918	331	0.0587814	0.47064	0.124897	NA	NA	NA	NA	NA	NA	NA	NA	NA	NA	NA	NA	NA	NA	NA	NA	NA	NA	NA	NA	NA	NA	NA	NA	NA	NA
Actinopteri	Oxygymnocypris_stewartii	361644	Chordata	Actinopteri	Cypriniformes	Cyprinidae	GCA_003573665.1	50.3	2.244e+09	NA	NA	2968.1	FishBase	NA	7.99568	394	0.0587239	0.441903	0.132889	447	0.0578576	0.44665	0.129537	NA	NA	NA	NA	NA	NA	NA	NA	NA	NA	NA	NA	NA	NA	NA	NA	NA	NA	NA	NA	NA	NA	NA	NA	NA	NA
Actinopteri	Danio_aesculapii	1142201	Chordata	Actinopteri	Cypriniformes	Danionidae	GCA_903798145.1	1.8	1.67788e+09	NA	NA	NA	NA	NA	NA	767	0.0196085	0.20586	0.0952516	870	0.0192213	0.20999	0.091534	0.124008	0.532324	0.127915	0.119835	0.579729	0.0591709	682634992	40.97	374537196	22.48	14740576	0.88	50267312	3.01	334280	0.02	38137044	2.28	18894992	1.13	957532	0.05	41796060	2.5	142970000	8.58
Actinopteri	Danio_kyathit	242068	Chordata	Actinopteri	Cypriniformes	Danionidae	GCA_903798195.1	2.4	2.07361e+09	NA	NA	NA	NA	NA	NA	781	0.0199526	0.193245	0.10325	887	0.0195982	0.195461	0.100266	0.124008	0.480413	0.146724	0.119835	0.443558	0.0780669	938985184	45.6	598796380	29.08	39632940	1.92	58559788	2.84	344164	0.01	49116724	2.38	25100780	1.21	1493536	0.07	80194676	3.89	85746196	4.16
Actinopteri	Danionella_dracula	623740	Chordata	Actinopteri	Cypriniformes	Danionidae	GCA_900490495.1	2.9	8.10949e+08	NA	NA	NA	NA	NA	NA	736	0.132959	1.53587	0.0865692	833	0.130943	1.54787	0.0845959	0.361167	1.40564	0.107188	0.384986	1.23412	0.0706074	119709960	14.86	22657880	2.81	3183472	0.39	9832208	1.22	34244	NA	12732856	1.58	2498704	0.31	190580	0.02	63148180	7.84	5431836	0.67
Actinopteri	Chanos_chanos	29144	Chordata	Actinopteri	Gonorynchiformes	Chanidae	GCA_902362185.1	4.3	8.00928e+08	15	AnAge	7700	AnAge	2.70805	8.94898	783	0.111645	1.54017	0.0724884	883	0.109386	1.55569	0.0703136	0.775947	0.76972	0.0792128	0.776364	0.756641	0.0497256	83969476	10.55	7449588	0.93	450740	0.05	3785148	0.47	360940	0.04	6201388	0.77	645824	0.08	38364	NA	63531016	7.98	1506468	0.18
Actinopteri	Amphilophus_citrinellus	61819	Chordata	Actinopteri	Cichliformes	Cichlidae	GCA_013435755.1	2.9	1.16923e+09	NA	NA	NA	NA	NA	NA	796	0.0446677	0.342996	0.130228	894	0.0864968	0.778758	0.11107	0.249585	0.409384	0.184232	0.267745	0.449525	0.106698	208314184	17.96	37399212	3.22	2942352	0.25	3615740	0.31	122152	0.01	24491376	2.11	1946388	0.16	199552	0.01	131744020	11.35	5853392	0.5
Actinopteri	Astatotilapia_calliptera	8154	Chordata	Actinopteri	Cichliformes	Cichlidae	GCA_900246225.5	2.4	1.07146e+09	NA	NA	NA	NA	NA	NA	697	0.00609359	0.0336872	0.180888	NA	NA	NA	NA	0.0201916	0.512101	0.27014	0.016648	0.539545	0.1483	272080688	25.57	40951644	3.84	3876548	0.36	9781276	0.91	54356	NA	32289364	3.03	3746972	0.35	1085548	0.1	177813112	16.71	2481868	0.23
Actinopteri	Simochromis_diagramma	43689	Chordata	Actinopteri	Cichliformes	Cichlidae	GCA_900408965.1	2.2	1.03319e+09	NA	NA	NA	NA	NA	NA	674	0.00548417	0.0300551	0.182471	NA	NA	NA	NA	0.0201916	0.397155	0.277402	0.016648	0.476386	0.14945	249318764	24.3	30804544	3	1797840	0.17	6238640	0.6	201676	0.01	25919480	2.52	2610464	0.25	910912	0.08	177243820	17.27	3591388	0.35
Actinopteri	Oreochromis_aureus	47969	Chordata	Actinopteri	Cichliformes	Cichlidae	GCA_013358895.1	1.5	1183380000	NA	NA	2010	FishBase	NA	7.60589	575	0.00380843	0.0204564	0.186173	NA	NA	NA	NA	0.0193867	0.313556	0.200167	0.0192501	0.35471	0.154503	NA	NA	NA	NA	NA	NA	NA	NA	NA	NA	NA	NA	NA	NA	NA	NA	NA	NA	NA	NA
Actinopteri	Oreochromis_niloticus	8128	Chordata	Actinopteri	Cichliformes	Cichlidae	GCA_001858045.3	1.8	1.22303e+09	9	AnAge	2400	AnAge	2.19722	7.78322	590	0.0038996	0.0225209	0.173155	NA	NA	NA	NA	0.0193867	0.342518	0.198843	0.0192501	0.373913	0.148734	NA	NA	NA	NA	NA	NA	NA	NA	NA	NA	NA	NA	NA	NA	NA	NA	NA	NA	NA	NA
Actinopteri	Aphyosemion_australe	52653	Chordata	Actinopteri	Cyprinodontiformes	Nothobranchiidae	GCA_006937985.1	2.1	1.05682e+09	NA	NA	NA	NA	NA	NA	799	0.0698718	0.608378	0.114849	900	0.0693785	0.619635	0.111967	0.179899	1.10075	0.157325	0.197334	0.959123	0.083543	514444504	48.89	39847960	3.78	2817712	0.26	13198768	1.25	55360	NA	40296640	3.82	1176096	0.11	199452	0.01	415086388	39.45	1766128	0.16
Actinopteri	Callopanchax_toddi	60409	Chordata	Actinopteri	Cyprinodontiformes	Nothobranchiidae	GCA_006937965.1	1.5	1.03871e+09	NA	NA	NA	NA	NA	NA	804	0.063807	0.506421	0.125996	908	0.0630789	0.515944	0.122259	0.179899	0.88199	0.165252	0.197334	0.75227	0.11885	403758888	39.03	35568672	3.43	517924	0.05	11775284	1.13	71176	NA	35237060	3.4	1467976	0.14	140552	0.01	315722652	30.52	3257592	0.31
Actinopteri	Pachypanchax_playfairii	52664	Chordata	Actinopteri	Cyprinodontiformes	Aplocheilidae	GCA_006937955.1	1.3	713940000	NA	NA	NA	NA	NA	NA	808	0.0864776	0.816819	0.105871	914	0.084673	0.826849	0.102404	0.243173	1.13094	0.135983	0.267824	0.973814	0.0777337	212415680	29.88	24324868	3.42	151540	0.02	4342168	0.61	70104	NA	17052560	2.39	563492	0.07	99304	0.01	164610060	23.15	1201584	0.16
Actinopteri	Kryptolebias_marmoratus	37003	Chordata	Actinopteri	Cyprinodontiformes	Rivulidae	GCA_001649575.2	1	8.29645e+08	NA	NA	NA	NA	NA	NA	806	0.0872858	0.783459	0.111411	912	0.0856807	0.793958	0.107916	0.275655	0.879918	0.155631	0.304035	0.779302	0.105898	189430108	23.08	16521700	2.01	5508596	0.67	14888840	1.81	14064	NA	18545764	2.26	592688	0.07	505784	0.06	129835844	15.82	3016828	0.36
Actinopteri	Cyprinodon_tularosa	77115	Chordata	Actinopteri	Cyprinodontiformes	Cyprinodontidae	GCA_016077235.1	0.9	1.32131e+09	5	AnAge	NA	NA	1.60944	NA	807	0.0731415	0.74067	0.0987504	914	0.0723249	0.752955	0.0960547	0.206994	1.21108	0.122277	0.237735	0.974521	0.0919009	515121628	39.26	61683388	4.7	11691108	0.89	23061912	1.75	145108	0.01	46046228	3.5	3600028	0.27	155824	0.01	360913736	27.5	7824296	0.59
Actinopteri	Gambusia_affinis	33528	Chordata	Actinopteri	Cyprinodontiformes	Poeciliidae	GCA_019740435.1	1.6	919320000	3	AnAge	NA	NA	1.09861	NA	813	0.0220044	0.135179	0.16278	911	0.0250706	0.163808	0.153049	0.0768038	0.53875	0.229495	0.0695737	0.62829	0.157683	179834016	19.7	16443856	1.8	1266432	0.13	6002920	0.65	13568	NA	10441196	1.14	364408	0.03	64244	NA	144121220	15.78	1116172	0.12
Actinopteri	Xiphophorus_couchianus	32473	Chordata	Actinopteri	Cyprinodontiformes	Poeciliidae	GCA_001444195.3	1	733500000	NA	NA	NA	NA	NA	NA	750	0.00643559	0.0384216	0.167499	NA	NA	NA	NA	0.0212896	0.474781	0.193734	0.0251519	0.612356	0.125657	87450444	12.05	9412852	1.29	246152	0.03	1173280	0.16	NA	NA	7270160	1	695756	0.09	29452	NA	68142492	9.39	480300	0.06
Actinopteri	Xiphophorus_maculatus	8083	Chordata	Actinopteri	Cyprinodontiformes	Poeciliidae	GCA_002775205.2	1.4	968220000	NA	NA	NA	NA	NA	NA	725	0.00532056	0.0352686	0.150858	NA	NA	NA	NA	0.0212896	0.573201	0.192062	0.0251519	0.465919	0.128863	NA	NA	NA	NA	NA	NA	NA	NA	NA	NA	NA	NA	NA	NA	NA	NA	NA	NA	NA	NA
Actinopteri	Xiphophorus_hellerii	8084	Chordata	Actinopteri	Cyprinodontiformes	Poeciliidae	GCA_003331165.2	2.4	978000000	NA	NA	NA	NA	NA	NA	725	0.00612142	0.036933	0.165744	NA	NA	NA	NA	0.0360239	0.292478	0.233104	0.0367391	0.360328	0.175109	200713708	20.66	23658396	2.43	1937752	0.19	5618008	0.57	76072	NA	14785272	1.52	559880	0.05	47248	NA	152570528	15.71	1460552	0.15
Actinopteri	Poeciliopsis_occidentalis	68464	Chordata	Actinopteri	Cyprinodontiformes	Poeciliidae	GCA_010883035.1	5.8	665040000	1	AnAge	NA	NA	0	NA	760	0.0316704	0.217259	0.145773	864	0.0309517	0.224034	0.138157	0.0886823	0.740627	0.191952	0.0797678	0.884922	0.13177	64144808	9.71	5146604	0.77	247824	0.03	2415560	0.36	41632	NA	4102104	0.62	102100	0.01	7984	NA	50795832	7.69	1285168	0.19
Actinopteri	Micropoecilia_picta	69234	Chordata	Actinopteri	Cyprinodontiformes	Poeciliidae	GCA_905332405.1	0.6	8.98221e+08	NA	NA	NA	NA	NA	NA	794	0.0345112	0.195054	0.176932	898	0.0398665	0.260877	0.152817	0.0720687	0.757949	0.218003	0.067424	1.09538	0.185046	NA	NA	NA	NA	NA	NA	NA	NA	NA	NA	NA	NA	NA	NA	NA	NA	NA	NA	NA	NA
Actinopteri	Poecilia_formosa	48698	Chordata	Actinopteri	Cyprinodontiformes	Poeciliidae	GCA_000485575.1	3.4	948660000	NA	NA	NA	NA	NA	NA	786	0.0154981	0.108449	0.142907	NA	NA	NA	NA	0.0720687	0.469115	0.193304	0.067424	0.549178	0.145769	NA	NA	NA	NA	NA	NA	NA	NA	NA	NA	NA	NA	NA	NA	NA	NA	NA	NA	NA	NA
Actinopteri	Hirundichthys_speculiger	938393	Chordata	Actinopteri	Beloniformes	Exocoetidae	GCA_018398805.1	6.8	1.26826e+09	NA	NA	NA	NA	NA	NA	766	0.0853582	0.774305	0.110238	856	0.0827874	0.769468	0.10759	0.318651	0.772539	0.16276	0.333932	0.725457	0.0939619	433048288	34.45	63607264	5.06	2064448	0.16	10686712	0.85	120728	NA	35195204	2.8	827324	0.06	301720	0.02	314624036	25.03	5620852	0.44
Actinopteri	Oryzias_celebensis	126373	Chordata	Actinopteri	Beloniformes	Adrianichthyidae	GCA_014656515.1	1.7	831300000	NA	NA	NA	NA	NA	NA	756	0.00835522	0.0552478	0.151232	NA	NA	NA	NA	0.0221434	0.774471	0.240089	0.01862	0.925931	0.121266	260224268	31.43	21424096	2.58	810988	0.09	8081228	0.97	41592	NA	11920680	1.44	154516	0.01	20952	NA	213846880	25.83	3923336	0.47
Actinopteri	Oryzias_woworae	1221322	Chordata	Actinopteri	Beloniformes	Adrianichthyidae	GCA_016861445.1	3.1	8.52455e+08	NA	NA	NA	NA	NA	NA	737	0.0082444	0.0481186	0.171335	NA	NA	NA	NA	0.0221434	0.656845	0.249721	0.01862	1.03073	0.125412	NA	NA	NA	NA	NA	NA	NA	NA	NA	NA	NA	NA	NA	NA	NA	NA	NA	NA	NA	NA
Actinopteri	Oryzias_javanicus	123683	Chordata	Actinopteri	Beloniformes	Adrianichthyidae	GCA_003999625.1	1.3	850860000	NA	NA	NA	NA	NA	NA	803	0.0423297	0.417402	0.101412	905	0.129025	1.40304	0.0919606	0.0914856	1.61075	0.135833	0.107585	1.19007	0.0945378	171132800	20.25	14558772	1.72	292048	0.03	9346396	1.1	297924	0.03	12883340	1.52	357224	0.04	95632	0.01	130720392	15.47	2581072	0.3
Actinopteri	Neostethus_bicornis	300306	Chordata	Actinopteri	Atheriniformes	Phallostethidae	GCA_902685375.1	3.7	9.47997e+08	NA	NA	NA	NA	NA	NA	793	0.169484	1.85205	0.0915113	895	0.165462	1.86902	0.0885286	0.342155	1.72148	0.118603	0.362988	1.80738	0.0708541	231995712	24.64	32460192	3.44	51220	NA	9133424	0.97	421232	0.04	39014676	4.14	4077152	0.43	130468	0.01	143397632	15.23	3309716	0.35
Actinopteri	Parambassis_ranga	210632	Chordata	Actinopteri	NA	Ambassidae	GCA_900634625.2	2.8	6.72756e+08	NA	NA	NA	NA	NA	NA	796	0.0939054	0.872467	0.107632	894	0.0931175	0.886903	0.104992	0.429008	0.670122	0.150865	0.44925	0.659966	0.0799628	108985072	16.31	9896352	1.48	5975436	0.89	3319208	0.49	170264	0.02	7397456	1.1	264528	0.03	24796	NA	79625580	11.91	2311452	0.34
Actinopteri	Amphiprion_percula	161767	Chordata	Actinopteri	NA	Pomacentridae	GCA_003047355.2	2.3	938880000	NA	NA	NA	NA	NA	NA	811	0.0696719	0.637251	0.109332	910	0.0688749	0.64802	0.106285	0.405535	0.485967	0.158815	0.407855	0.549728	0.0826299	NA	NA	NA	NA	NA	NA	NA	NA	NA	NA	NA	NA	NA	NA	NA	NA	NA	NA	NA	NA
Actinopteri	Gouania_willdenowi	441366	Chordata	Actinopteri	Blenniiformes	Gobiesocidae	GCA_900634775.2	3.1	1.14011e+09	NA	NA	NA	NA	NA	NA	774	0.145159	1.44214	0.100655	872	0.143966	1.48015	0.0972642	0.308229	1.57338	0.124841	0.302395	1.57086	0.0850312	399428936	35.28	42754500	3.77	1265728	0.11	10877376	0.96	387104	0.03	27151224	2.39	1781448	0.15	291468	0.02	301549016	26.63	13371072	1.18
Actinopteri	Salarias_fasciatus	181472	Chordata	Actinopteri	Blenniiformes	Blenniidae	GCA_902148845.1	6.3	811740000	NA	NA	NA	NA	NA	NA	759	0.0994101	1.13698	0.0874338	857	0.0983479	1.16274	0.084583	0.308229	1.26331	0.102713	0.302395	1.12834	0.0822655	130797900	16.22	8555412	1.06	683948	0.08	4265616	0.52	89076	0.01	10756108	1.33	355492	0.04	42160	NA	103826980	12.88	2223108	0.27
Actinopteri	Anabas_testudineus	64144	Chordata	Actinopteri	Anabantiformes	Anabantidae	GCA_900324465.3	2.3	6.78358e+08	8	AnAge	NA	NA	2.07944	NA	804	0.0549757	0.474919	0.115758	898	0.0549491	0.490573	0.11201	0.335457	0.447081	0.16055	0.326073	0.474612	0.0951633	69362660	10.29	5353316	0.79	255576	0.03	1127696	0.16	59768	NA	4539040	0.67	183512	0.02	11416	NA	55967600	8.3	1864736	0.27
Actinopteri	Betta_splendens	158456	Chordata	Actinopteri	Anabantiformes	Osphronemidae	GCA_900634795.3	2.4	616140000	2	AnAge	NA	NA	0.693147	NA	805	0.0977909	0.891857	0.109649	900	0.0960491	0.905542	0.106068	0.335457	0.83904	0.158918	0.326073	0.900822	0.0873917	NA	NA	NA	NA	NA	NA	NA	NA	NA	NA	NA	NA	NA	NA	NA	NA	NA	NA	NA	NA
Actinopteri	Channa_argus	215402	Chordata	Actinopteri	Anabantiformes	Channidae	GCA_018997905.1	1.6	860640000	NA	NA	8000	FishBase	NA	8.9872	770	0.0107247	0.0678889	0.157974	NA	NA	NA	NA	0.0779087	0.27222	0.223795	0.0637584	0.341619	0.14375	177368540	20.75	13774732	1.61	190616	0.02	2877624	0.33	9120	NA	13691436	1.6	1671128	0.19	1348	NA	139284544	16.29	5867992	0.68
Actinopteri	Channa_maculata	188791	Chordata	Actinopteri	Anabantiformes	Channidae	GCA_020496755.1	1.8	7.54808e+08	NA	NA	NA	NA	NA	NA	756	0.0098174	0.0684337	0.143459	NA	NA	NA	NA	0.0779087	0.220188	0.23266	0.0637584	0.284545	0.112153	151639464	20.23	13500004	1.8	200660	0.02	3655932	0.48	6560	NA	12057368	1.6	1599756	0.21	196	NA	114827496	15.32	5791492	0.77
Actinopteri	Mastacembelus_armatus	205130	Chordata	Actinopteri	Synbranchiformes	Mastacembelidae	GCA_900324485.3	1.4	7.22284e+08	NA	NA	500	FishBase	NA	6.21461	810	0.0806535	0.655102	0.123116	905	0.079364	0.663665	0.119584	0.426874	0.494805	0.185117	0.406586	0.511702	0.0968946	126878660	17.69	15093204	2.1	949540	0.13	5137860	0.71	133496	0.01	12109780	1.68	937416	0.13	11156	NA	89029984	12.41	3476224	0.48
Actinopteri	Brachirus_orientalis	435138	Chordata	Actinopteri	Pleuronectiformes	Soleidae	GCA_016785285.1	1	7.68282e+08	NA	NA	NA	NA	NA	NA	803	0.088252	0.788809	0.11188	903	0.0868436	0.798352	0.108779	0.271859	0.908828	0.176741	0.268125	0.991184	0.086412	164942780	21.61	15368784	2.01	314016	0.04	9732572	1.27	246072	0.03	8921408	1.16	3065352	0.4	101940	0.01	121666856	15.94	5525780	0.72
Actinopteri	Trinectes_maculatus	195658	Chordata	Actinopteri	Pleuronectiformes	Achiridae	GCA_016785345.1	1.9	5.50712e+08	6	AnAge	NA	NA	1.79176	NA	805	0.0880258	0.710977	0.123809	908	0.086831	0.720763	0.120471	0.271859	0.821112	0.178765	0.268125	0.891643	0.106104	95956500	17.54	5840928	1.06	237816	0.04	13296160	2.43	143432	0.02	7047588	1.28	393532	0.07	21828	NA	66790336	12.21	2184880	0.39
Actinopteri	Colistium_nudipinnis	1156758	Chordata	Actinopteri	Pleuronectiformes	Rhombosoleidae	GCA_016785305.1	1.6	5.23287e+08	16	FishBase	1500	FishBase	2.77259	7.31322	811	0.094979	0.78727	0.120643	909	0.0935522	0.80294	0.116512	0.279161	0.845765	0.180062	0.263209	1.02079	0.11288	83779956	16.12	1203100	0.23	42476	NA	978136	0.18	399800	0.07	1605912	0.3	232244	0.04	2060	NA	77149784	14.84	2166444	0.41
Actinopteri	Pseudorhombus_dupliciocellatus	367197	Chordata	Actinopteri	Pleuronectiformes	Paralichthyidae	GCA_016785235.1	1.6	4.8402e+08	NA	NA	NA	NA	NA	NA	811	0.0980916	0.861483	0.113864	915	0.0968384	0.873881	0.110814	0.279161	1.07284	0.163029	0.263209	1.06676	0.0874672	78167420	16.26	2122912	0.44	21944	NA	5096272	1.06	37912	NA	3151368	0.65	68268	0.01	NA	NA	64001148	13.31	3667596	0.76
Actinopteri	Polydactylus_sextarius	435218	Chordata	Actinopteri	NA	Polynemidae	GCA_016801845.1	1.2	6.89208e+08	NA	NA	NA	NA	NA	NA	795	0.0832353	0.932121	0.0892966	888	0.0825235	0.9497	0.0868942	0.377978	0.676782	0.146083	0.370132	0.896869	0.0676091	71247640	10.41	6589700	0.96	1251248	0.18	770556	0.11	18260	NA	3874508	0.56	422936	0.06	960	NA	56901140	8.31	1418332	0.2
Actinopteri	Echeneis_naucrates	173247	Chordata	Actinopteri	Carangiformes	Echeneidae	GCA_900963305.2	1.7	665040000	NA	NA	2300	FishBase	NA	7.74066	805	0.0813284	0.792955	0.102564	900	0.080303	0.800887	0.100267	0.306698	0.860679	0.161993	0.313859	0.938307	0.0746008	64485600	9.76	6418656	0.97	499704	0.07	1540580	0.23	166812	0.02	4054504	0.61	148600	0.02	1444	NA	50001268	7.57	1654032	0.25
Actinopteri	Seriola_lalandi_dorsalis	1841481	Chordata	Actinopteri	Carangiformes	Carangidae	GCA_002814215.1	4.2	8.92406e+08	12	FishBase	96840	FishBase	2.48491	11.4808	790	0.0356364	0.265857	0.134044	882	0.0351391	0.269899	0.130194	0.261822	0.303583	0.216179	0.273359	0.329725	0.100932	88984520	10.07	8094284	0.91	89548	0.01	1005560	0.11	22940	NA	3387872	0.38	511848	0.05	3312	NA	74327076	8.41	1542080	0.17
Actinopteri	Trachurus_trachurus	36212	Chordata	Actinopteri	Carangiformes	Carangidae	GCA_905171665.1	3.4	9.98495e+08	NA	NA	2000	FishBase	NA	7.6009	800	0.074935	0.727383	0.10302	890	0.0746348	0.744016	0.100314	0.261822	0.874265	0.148671	0.273359	0.985441	0.0811125	179518392	18.1	14143324	1.42	1779756	0.17	8240272	0.83	427284	0.04	6615320	0.66	664568	0.06	68524	NA	139757372	14.09	7821972	0.78
Actinopteri	Istiophorus_platypterus	13575	Chordata	Actinopteri	Istiophoriformes	Istiophoridae	GCA_016859345.1	1.4	7.49148e+08	13	AnAge	55110	AnAge	2.56495	10.9171	794	0.0523524	0.493081	0.106174	889	0.0511315	0.496828	0.102916	0.288643	0.498328	0.185035	0.274471	0.729012	0.0798764	67014020	9	8849560	1.18	91640	0.01	398712	0.05	48920	NA	7050064	0.94	31160	NA	88	NA	49789576	6.69	754300	0.1
Actinopteri	Xiphias_gladius	8245	Chordata	Actinopteri	Istiophoriformes	Xiphiidae	GCA_016859285.1	1.8	645480000	NA	NA	650000	FishBase	NA	13.3847	811	0.0381803	0.262377	0.145517	905	0.037958	0.265441	0.143	0.288643	0.30656	0.199269	0.274471	0.31806	0.120252	100622432	15.69	12442488	1.94	152264	0.02	3554628	0.55	69220	0.01	2994716	0.46	164436	0.02	NA	NA	80211076	12.51	1033604	0.16
Actinopteri	Lates_calcarifer	8187	Chordata	Actinopteri	NA	Centropomidae	GCA_001640805.1	5.1	684600000	NA	NA	NA	NA	NA	NA	787	0.048678	0.415678	0.117105	881	0.048529	0.422451	0.114875	0.334442	0.418984	0.179106	0.3329	0.406608	0.0923278	42349408	6.25	4195460	0.61	963420	0.14	947452	0.13	1640	NA	3272548	0.48	335448	0.04	7092	NA	32171656	4.75	454692	0.06
Actinopteri	Toxotes_chatareus	270537	Chordata	Actinopteri	NA	Toxotidae	GCA_016801885.1	1.7	7.54695e+08	NA	NA	750	FishBase	NA	6.62007	767	0.0497675	0.38579	0.129002	858	0.0488851	0.390077	0.125322	0.334442	0.379594	0.198784	0.3329	0.3873	0.103582	108345088	14.45	6332208	0.84	1028636	0.13	3334672	0.44	49096	NA	6247416	0.83	120460	0.01	89632	0.01	90166392	12.03	976576	0.13
Actinopteri	Psettodes_erumei	195640	Chordata	Actinopteri	Pleuronectiformes	Psettodidae	GCA_016785225.1	1.5	694380000	NA	NA	9000	FishBase	NA	9.10498	806	0.0761875	0.761155	0.100095	906	0.0749646	0.772506	0.0970408	0.355704	0.586808	0.168262	0.355835	0.731231	0.0855702	173031808	25.09	1967960	0.28	1222468	0.17	4747608	0.68	21112	NA	6695188	0.97	14936	NA	6112	NA	157090708	22.78	1265716	0.18
Actinopteri	Cephalopholis_sonnerati	160708	Chordata	Actinopteri	Perciformes	Serranidae	GCA_019142605.1	3.2	1.26908e+09	NA	NA	NA	NA	NA	NA	795	0.0239448	0.206486	0.115963	897	0.0415117	0.368563	0.112631	0.237206	0.320382	0.152179	0.244446	0.276111	0.0948296	377296792	29.94	54965372	4.36	16781896	1.33	3635176	0.28	63712	NA	27672056	2.19	1604448	0.12	54936	NA	270554272	21.47	1964924	0.15
Actinopteri	Epinephelus_coioides	94232	Chordata	Actinopteri	Perciformes	Serranidae	GCA_900536245.1	1.9	1.24467e+09	22	AnAge	8250	AnAge	3.09104	9.01797	767	0.00856374	0.0588863	0.145428	NA	NA	NA	NA	0.0631389	0.296743	0.177543	0.0820916	0.283659	0.127624	NA	NA	NA	NA	NA	NA	NA	NA	NA	NA	NA	NA	NA	NA	NA	NA	NA	NA	NA	NA
Actinopteri	Epinephelus_lanceolatus	310571	Chordata	Actinopteri	Perciformes	Serranidae	GCA_005281545.1	2.3	1.32196e+09	NA	NA	400000	FishBase	NA	12.8992	779	0.00785167	0.0521754	0.150486	NA	NA	NA	NA	0.0631389	0.238758	0.200079	0.0820916	0.220729	0.137311	470393532	35.83	65392268	4.98	4076376	0.31	5560648	0.42	50568	NA	33061160	2.51	2386356	0.18	44716	NA	356151216	27.12	3670224	0.27
Actinopteri	Plectropomus_leopardus	160734	Chordata	Actinopteri	Perciformes	Serranidae	GCA_008729295.2	3.6	1017120000	26	AnAge	12980	AnAge	3.2581	9.47116	745	0.0505359	0.481446	0.104967	835	0.0488148	0.47584	0.102587	0.335853	0.478032	0.14551	0.356568	0.447737	0.0682981	98308752	9.74	7744276	0.76	380800	0.03	3992616	0.39	46320	NA	6849436	0.67	453752	0.04	NA	NA	76905764	7.62	1935788	0.19
Actinopteri	Cottoperca_gobio	56716	Chordata	Actinopteri	Perciformes	Bovichtidae	GCA_900634415.1	1.9	7.43393e+08	NA	NA	NA	NA	NA	NA	755	0.0536382	0.307764	0.174284	838	0.0534199	0.31714	0.168443	0.292761	0.307943	0.268646	0.307423	0.328886	0.128287	183905552	24.92	5871364	0.79	139360	0.01	3611492	0.48	209400	0.02	8003532	1.08	332380	0.04	4260	NA	157565060	21.35	8168704	1.1
Actinopteri	Dissostichus_mawsoni	36200	Chordata	Actinopteri	Perciformes	Nototheniidae	GCA_011823955.1	8	997560000	31	AnAge	44000	AnAge	3.43399	10.6919	713	0.0135684	0.0620471	0.218679	777	0.018805	0.114923	0.163631	0.0345065	0.418559	0.308681	0.0330537	0.613833	0.200809	NA	NA	NA	NA	NA	NA	NA	NA	NA	NA	NA	NA	NA	NA	NA	NA	NA	NA	NA	NA
Actinopteri	Trematomus_bernacchii	40690	Chordata	Actinopteri	Perciformes	Nototheniidae	GCA_902827165.1	2.6	1163820000	10	AnAge	NA	NA	2.30259	NA	602	0.00737751	0.0410152	0.179873	NA	NA	NA	NA	0.0152967	0.397	0.312725	0.0174766	0.491731	0.184351	331362220	28.67	32366020	2.8	1019556	0.08	11122980	0.96	110284	NA	24581912	2.12	648776	0.05	23120	NA	255652576	22.12	5836996	0.5
Actinopteri	Trematomus_loennbergii	40692	Chordata	Actinopteri	Perciformes	Nototheniidae	GCA_012861695.1	13.1	1.47096e+09	NA	NA	NA	NA	NA	NA	588	0.010403	0.041215	0.252409	NA	NA	NA	NA	0.0152967	0.486556	0.331275	0.0174766	0.560963	0.204707	615890276	42.16	50442008	3.45	1802044	0.12	18377724	1.25	150572	0.01	41314984	2.82	1088212	0.07	10448	NA	492135644	33.69	10568640	0.72
Actinopteri	Gymnodraco_acuticeps	8218	Chordata	Actinopteri	Perciformes	Bathydraconidae	GCA_902827175.1	1.8	1.21239e+09	NA	NA	NA	NA	NA	NA	699	0.00757522	0.0349948	0.216467	NA	NA	NA	NA	0.0221144	0.521713	0.288385	0.0212351	0.562219	0.181125	476979616	39.62	53785492	4.46	1178988	0.09	18854660	1.56	358224	0.02	36874124	3.06	822220	0.06	3448	NA	355048504	29.49	10053956	0.83
Actinopteri	Pseudochaenichthys_georgianus	52239	Chordata	Actinopteri	Perciformes	Channichthyidae	GCA_902827115.1	1.8	1.24775e+09	NA	NA	2080	FishBase	NA	7.64012	731	0.0114191	0.0608153	0.187766	835	0.023245	0.157233	0.147838	0.0221144	0.446663	0.285079	0.0212351	1.03897	0.157393	478611856	38.63	58416384	4.71	477312	0.03	23096260	1.86	885652	0.07	44106932	3.56	931880	0.07	NA	NA	341801360	27.59	8896076	0.71
Actinopteri	Harpagifer_antarcticus	43256	Chordata	Actinopteri	Perciformes	Harpagiferidae	GCA_902827135.1	1.9	1.14536e+09	9	AnAge	NA	NA	2.19722	NA	717	0.00994027	0.0497283	0.199892	NA	NA	NA	NA	0.0229501	0.545221	0.267814	0.0240543	0.811788	0.159981	411875016	36.22	42001712	3.69	564120	0.04	12476564	1.09	343876	0.03	38111768	3.35	779492	0.06	15892	NA	310314696	27.29	7266896	0.63
Actinopteri	Ophiodon_elongatus	225387	Chordata	Actinopteri	Perciformes	Hexagrammidae	GCA_016806645.1	1.8	7.8757e+08	20	AnAge	32505	AnAge	2.99573	10.3891	788	0.039253	0.246636	0.159154	880	0.0393188	0.253773	0.154937	0.213447	0.345563	0.230081	0.169052	0.398159	0.150432	121008960	15.47	7737080	0.98	1594744	0.2	3096324	0.39	129908	0.01	8664064	1.1	956508	0.12	13904	NA	96145240	12.29	2671188	0.34
Actinopteri	Pseudoliparis_sp._Yap_Trench	2499240	Chordata	Actinopteri	Perciformes	Liparidae	GCA_004335475.1	15.5	1.02328e+09	NA	NA	NA	NA	NA	NA	654	0.0816113	0.539274	0.151335	725	0.0805038	0.555015	0.145048	0.213447	0.546935	0.245338	0.169052	1.11014	0.166728	378825000	37.28	26582512	2.61	2953524	0.29	21058120	2.07	143836	0.01	42198516	4.15	1291680	0.12	1421848	0.13	271794300	26.75	11380664	1.12
Actinopteri	Pungitius_pungitius	134920	Chordata	Actinopteri	Perciformes	Gasterosteidae	GCA_902500615.3	2.1	5.70567e+08	5	AnAge	NA	NA	1.60944	NA	797	0.0832669	0.673299	0.12367	895	0.0809559	0.678213	0.119366	0.260906	0.848257	0.183106	0.229307	0.950139	0.120827	138976280	24.46	6904420	1.21	917584	0.16	7520196	1.32	371892	0.06	4607508	0.81	116372	0.02	2636	NA	114995636	20.24	3540036	0.62
Actinopteri	Sebastes_aleutianus	214485	Chordata	Actinopteri	Perciformes	Sebastidae	GCA_916700875.1	10.7	1.08245e+09	205	AnAge	495	AnAge	5.32301	6.20456	659	0.00634164	0.0413434	0.15339	NA	NA	NA	NA	0.0797545	0.147924	0.229835	0.0953894	0.14213	0.110184	350215956	32.58	51049504	4.74	2307556	0.21	4283172	0.39	101656	NA	13222924	1.23	1365776	0.12	20260	NA	273163192	25.41	4701916	0.43
Actinopteri	Sebastes_dallii	394690	Chordata	Actinopteri	Perciformes	Sebastidae	GCA_916700725.1	3.5	1.03363e+09	12	AnAge	NA	NA	2.48491	NA	703	0.00730113	0.046441	0.157213	NA	NA	NA	NA	0.0797545	0.186891	0.191746	0.0953894	0.158633	0.147105	328815164	32.03	44271492	4.31	7354872	0.71	5303748	0.51	87412	NA	14055884	1.36	1465132	0.14	17176	NA	252516676	24.6	3742772	0.36
Actinopteri	Sebastes_diaconus	2603974	Chordata	Actinopteri	Perciformes	Sebastidae	GCA_916700945.1	1.8	1.00612e+09	NA	NA	NA	NA	NA	NA	317	0.00254499	0.016151	0.157575	NA	NA	NA	NA	0.019869	0.0867002	0.172592	0.0229223	0.12835	0.0900173	304133040	30.44	42948572	4.29	2205052	0.22	4015324	0.4	68708	NA	11021032	1.1	1347404	0.13	22868	NA	238806672	23.9	3697408	0.37
Actinopteri	Sebastes_mystinus	72088	Chordata	Actinopteri	Perciformes	Sebastidae	GCA_916701245.1	1.9	9.72244e+08	44	AnAge	2084.5	AnAge	3.78419	7.64228	365	0.00323903	0.0175693	0.184357	NA	NA	NA	NA	0.019869	0.0838378	0.200682	0.0229223	0.106717	0.120482	291863836	30.23	42078228	4.35	2117072	0.21	3675420	0.38	52904	NA	10636404	1.1	1564268	0.16	21192	NA	228224356	23.64	3493992	0.36
Actinopteri	Sebastes_flavidus	72076	Chordata	Actinopteri	Perciformes	Sebastidae	GCA_916700785.1	1.9	9.78577e+08	64	AnAge	1380.5	AnAge	4.15888	7.2302	662	0.0061408	0.0399238	0.153813	NA	NA	NA	NA	0.0673847	0.13822	0.210706	0.0789064	0.158243	0.109389	306237288	31.51	43908104	4.51	3363412	0.34	3439972	0.35	114412	0.01	11781492	1.21	1146964	0.11	18696	NA	238312732	24.52	4151504	0.42
Actinopteri	Sebastes_miniatus	72087	Chordata	Actinopteri	Perciformes	Sebastidae	GCA_916701275.1	9.6	1.03551e+09	43	AnAge	3700	AnAge	3.7612	8.21609	672	0.0065176	0.0447811	0.145543	NA	NA	NA	NA	0.0911414	0.160736	0.196588	0.116424	0.119107	0.120475	278373588	27.07	34654360	3.37	1357716	0.13	2898992	0.28	88132	NA	11279792	1.09	1347868	0.13	8168	NA	220602316	21.45	6136244	0.59
Actinopteri	Sebastes_moseri	394697	Chordata	Actinopteri	Perciformes	Sebastidae	GCA_916701315.1	1.6	9.65548e+08	NA	NA	NA	NA	NA	NA	713	0.00754879	0.0479389	0.157467	NA	NA	NA	NA	0.0906581	0.152256	0.180022	0.112619	0.149797	0.114101	292877532	30.54	42375288	4.41	2605444	0.27	3494308	0.36	84692	NA	10228600	1.06	977032	0.1	15720	NA	229304612	23.91	3791836	0.39
Actinopteri	Sebastes_scythropus	173978	Chordata	Actinopteri	Perciformes	Sebastidae	GCA_916701475.1	1.7	9.43712e+08	NA	NA	NA	NA	NA	NA	726	0.00842463	0.0528642	0.159364	NA	NA	NA	NA	0.0906581	0.185636	0.198839	0.112619	0.144324	0.155992	278435604	29.71	40047256	4.27	1698264	0.18	2172652	0.23	73764	NA	9124392	0.97	1043552	0.11	2248	NA	218333536	23.29	5939940	0.63
Actinopteri	Sebastes_joyneri	160817	Chordata	Actinopteri	Perciformes	Sebastidae	GCA_916701105.1	2	9.50392e+08	NA	NA	NA	NA	NA	NA	754	0.00838342	0.0545682	0.153632	NA	NA	NA	NA	0.128458	0.115086	0.184252	0.149249	0.116873	0.127671	275737868	29.21	41967956	4.44	1762136	0.18	2821444	0.29	51996	NA	10029240	1.06	1278084	0.13	13896	NA	213909200	22.66	3903916	0.41
Actinopteri	Sebastes_hubbsi	201703	Chordata	Actinopteri	Perciformes	Sebastidae	GCA_916701285.1	1.6	9.66886e+08	NA	NA	NA	NA	NA	NA	685	0.00592728	0.03453	0.171656	NA	NA	NA	NA	0.0727393	0.122822	0.197522	0.0677443	0.145174	0.144299	300807700	31.33	37761904	3.93	4284672	0.44	4721740	0.49	127072	0.01	10943412	1.13	1013156	0.1	7368	NA	234615612	24.43	7332764	0.76
Actinopteri	Sebastes_pachycephalus	201706	Chordata	Actinopteri	Perciformes	Sebastidae	GCA_916701075.1	1.6	9.63276e+08	NA	NA	1560	FishBase	NA	7.35244	639	0.00433485	0.0269336	0.160946	NA	NA	NA	NA	0.0727393	0.0965986	0.197466	0.0677443	0.108083	0.137098	303205284	31.69	38634980	4.03	5700816	0.59	2754724	0.28	268028	0.02	11070264	1.15	1101156	0.11	16340	NA	238461884	24.93	5197092	0.54
Actinopteri	Sebastes_schlegelii	214486	Chordata	Actinopteri	Perciformes	Sebastidae	GCA_014673565.1	3.2	1.03222e+09	20	FishBase	3140	FishBase	2.99573	8.05198	731	0.00606485	0.0405511	0.149561	NA	NA	NA	NA	0.118017	0.120498	0.215905	0.128235	0.11706	0.139745	332405672	32.42	42849992	4.18	1932464	0.18	4299020	0.41	201224	0.01	12999880	1.26	1173356	0.11	40724	NA	264069408	25.76	4839604	0.47
Actinopteri	Perca_flavescens	8167	Chordata	Actinopteri	Perciformes	Percidae	GCA_004354835.1	1.8	899760000	12	AnAge	1055.25	AnAge	2.48491	6.96153	792	0.0122706	0.0817135	0.150166	NA	NA	NA	NA	0.0958604	0.233112	0.242178	0.0914955	0.367758	0.141719	231211256	25.87	31419212	3.51	1361208	0.15	2243524	0.25	342676	0.03	16833404	1.88	1843604	0.2	82304	NA	173182212	19.38	3903112	0.43
Actinopteri	Perca_fluviatilis	8168	Chordata	Actinopteri	Perciformes	Percidae	GCA_010015445.1	1.9	1193160000	22	AnAge	2612.5	AnAge	3.09104	7.86806	775	0.0102807	0.0665076	0.15458	NA	NA	NA	NA	0.0958604	0.194653	0.270087	0.0914955	0.298047	0.143823	544336440	45.94	56307396	4.75	3411668	0.28	7953308	0.67	165288	0.01	34387880	2.9	2611556	0.22	242372	0.02	430519260	36.33	8737712	0.73
Actinopteri	Sander_lucioperca	283035	Chordata	Actinopteri	Perciformes	Percidae	GCA_008315115.2	2.3	1114920000	16	AnAge	11000	AnAge	2.77259	9.30565	796	0.0132366	0.0895507	0.147811	NA	NA	NA	NA	0.170761	0.153947	0.191448	0.179922	0.200098	0.114538	413315504	37.32	51251596	4.62	3685276	0.33	4790464	0.43	94332	NA	32089276	2.89	3567972	0.32	102328	NA	313598960	28.32	4135300	0.37
Actinopteri	Coreoperca_whiteheadi	228250	Chordata	Actinopteri	Centrarchiformes	Sinipercidae	GCA_011952105.1	1.7	8.68129e+08	NA	NA	NA	NA	NA	NA	799	0.0414966	0.287899	0.144136	900	0.0452078	0.317841	0.142234	0.297048	0.295114	0.214692	0.307261	0.357397	0.118857	228164756	26.46	15148160	1.75	213208	0.02	9879856	1.14	45460	NA	20211916	2.34	608556	0.07	11180	NA	170044156	19.72	12002264	1.39
Actinopteri	Siniperca_chuatsi	119488	Chordata	Actinopteri	Centrarchiformes	Sinipercidae	GCA_020085105.1	2	880200000	9	FishBase	8000	FishBase	2.19722	8.9872	629	0.00429001	0.0253831	0.169011	NA	NA	NA	NA	0.054503	0.147729	0.209277	0.04378	0.143546	0.0738136	179056040	20.48	17231164	1.97	677832	0.07	3839900	0.43	242748	0.02	24028852	2.74	509516	0.05	15428	NA	130732900	14.95	1777700	0.2
Actinopteri	Siniperca_knerii	214812	Chordata	Actinopteri	Centrarchiformes	Sinipercidae	GCA_011952075.1	1.9	8.81579e+08	NA	NA	739.8	FishBase	NA	6.60638	626	0.00430087	0.0237725	0.180917	NA	NA	NA	NA	0.054503	0.131159	0.2122	0.04378	0.120701	0.0774487	189825888	21.68	16726520	1.91	700360	0.07	4373384	0.49	194704	0.02	21000996	2.39	817116	0.09	932	NA	143189808	16.35	2822068	0.32
Actinopteri	Siniperca_scherzeri	228252	Chordata	Actinopteri	Centrarchiformes	Sinipercidae	GCA_011952095.1	2.1	8.96827e+08	NA	NA	607.3	FishBase	NA	6.40902	733	0.00612362	0.0384596	0.159222	NA	NA	NA	NA	0.107681	0.133207	0.20973	0.117836	0.0993977	0.121873	201148572	22.58	17811976	1.99	728988	0.08	4990268	0.56	289424	0.03	25389812	2.85	1087552	0.12	7112	NA	148193080	16.63	2650360	0.29
Actinopteri	Micropterus_salmoides	27706	Chordata	Actinopteri	Centrarchiformes	Centrarchidae	GCA_014851395.1	9.2	997560000	23	AnAge	5527.5	AnAge	3.13549	8.61749	758	0.0489225	0.372154	0.131458	842	0.0466507	0.366165	0.127404	0.347956	0.340579	0.203377	0.348128	0.339001	0.115028	885610260	89.39	3018932	0.3	855092	0.08	4566568	0.46	22988	NA	2313180	0.23	122544	0.01	1216	NA	874001048	88.22	708692	0.07
Actinopteri	Maccullochella_peelii	135761	Chordata	Actinopteri	Centrarchiformes	Percichthyidae	GCA_002120245.1	1.6	7.72258e+08	48	AnAge	62000	AnAge	3.8712	11.0349	795	0.0278355	0.166664	0.167016	890	0.0274297	0.170846	0.160552	0.265112	0.195004	0.216801	0.290059	0.198612	0.15783	250826428	32.61	20952064	2.72	1273328	0.16	3677236	0.47	300892	0.03	20124000	2.61	489300	0.06	3936	NA	201019204	26.14	2986468	0.38
Actinopteri	Macquaria_ambigua	135764	Chordata	Actinopteri	Centrarchiformes	Percichthyidae	GCA_008360985.1	1.5	8.06375e+08	20	AnAge	13200	AnAge	2.99573	9.48797	800	0.0132497	0.0756167	0.175221	895	0.0132454	0.0788021	0.168085	0.166866	0.126237	0.252684	0.193271	0.153882	0.122695	144079456	17.98	13085732	1.63	864348	0.1	2161016	0.26	200184	0.02	10733444	1.33	248792	0.03	1748	NA	115535488	14.42	1248704	0.15
Actinopteri	Macquaria_australasica	135765	Chordata	Actinopteri	Centrarchiformes	Percichthyidae	GCA_005408345.1	1.7	8.23982e+08	NA	NA	3500	FishBase	NA	8.16052	803	0.0215993	0.119082	0.181381	899	0.0211807	0.120907	0.175182	0.166866	0.249277	0.242357	0.193271	0.214091	0.15631	NA	NA	NA	NA	NA	NA	NA	NA	NA	NA	NA	NA	NA	NA	NA	NA	NA	NA	NA	NA
Actinopteri	Collichthys_lucidus	240159	Chordata	Actinopteri	NA	Sciaenidae	GCA_004119915.2	25.1	1.06803e+09	NA	NA	NA	NA	NA	NA	585	0.0143473	0.106515	0.134697	672	0.0275267	0.226456	0.121554	0.0674239	0.603466	0.199782	0.0661929	0.47391	0.093318	NA	NA	NA	NA	NA	NA	NA	NA	NA	NA	NA	NA	NA	NA	NA	NA	NA	NA	NA	NA
Actinopteri	Larimichthys_crocea	215358	Chordata	Actinopteri	NA	Sciaenidae	GCA_000972845.2	1.6	8.02151e+08	NA	NA	NA	NA	NA	NA	791	0.0148579	0.109192	0.136071	NA	NA	NA	NA	0.0674239	0.318837	0.211298	0.0661929	0.33595	0.138386	NA	NA	NA	NA	NA	NA	NA	NA	NA	NA	NA	NA	NA	NA	NA	NA	NA	NA	NA	NA
Actinopteri	Nibea_albiflora	240163	Chordata	Actinopteri	NA	Sciaenidae	GCA_014281875.1	4.7	7.65405e+08	4	FishBase	1479	FishBase	1.38629	7.29912	776	0.0246803	0.183655	0.134384	873	0.0353779	0.306135	0.115563	0.14963	0.401058	0.199858	0.158177	0.351919	0.11631	95492876	12.56	6173208	0.81	2608092	0.34	6944296	0.91	18440	NA	4235632	0.55	371980	0.04	1652	NA	73082032	9.61	2057544	0.27
Actinopteri	Lutjanus_erythropterus	211835	Chordata	Actinopteri	Lutjaniformes	Lutjanidae	GCA_020091685.1	1.8	1.17971e+09	8	AnAge	NA	NA	2.07944	NA	814	0.0524295	0.473283	0.110778	904	0.0518936	0.479322	0.108264	0.384857	0.422372	0.162079	0.408777	0.385477	0.0842776	NA	NA	NA	NA	NA	NA	NA	NA	NA	NA	NA	NA	NA	NA	NA	NA	NA	NA	NA	NA
Actinopteri	Datnioides_undecimradiatus	1333648	Chordata	Actinopteri	Lobotiformes	Datnioididae	GCA_008933995.1	4.4	7.26016e+08	NA	NA	NA	NA	NA	NA	789	0.0614682	0.609857	0.100791	887	0.0610678	0.616398	0.0990719	0.388264	0.501914	0.141656	0.391113	0.506656	0.085954	42984828	5.98	3068108	0.42	3528	NA	2083556	0.29	138184	0.01	4369592	0.6	121776	0.01	384	NA	32979604	4.59	220096	0.03
Actinopteri	Sparus_aurata	8175	Chordata	Actinopteri	Spariformes	Sparidae	GCA_900880675.2	2.4	929100000	11	AnAge	9460	AnAge	2.3979	9.15483	803	0.0694307	0.553896	0.12535	898	0.0688494	0.563357	0.122213	0.388264	0.502717	0.189832	0.391113	0.417344	0.10872	136406772	14.78	11840088	1.28	2036996	0.22	3535104	0.38	267148	0.02	8551412	0.92	833996	0.09	30036	NA	106817820	11.57	2494172	0.27
Actinopteri	Lophius_piscatorius	8074	Chordata	Actinopteri	Lophiiformes	Lophiidae	GCA_009660295.1	1.6	9.10384e+08	24	AnAge	31735	AnAge	3.17805	10.3652	788	0.114862	0.956814	0.120047	880	0.113098	0.970677	0.116515	0.367993	0.841819	0.183319	0.3729	0.862182	0.101973	192321784	21.27	14753228	1.63	252512	0.02	1757824	0.19	129180	0.01	20895756	2.31	959736	0.1	120292	0.01	151272776	16.73	2180480	0.24
Actinopteri	Pao_palembangensis	1820603	Chordata	Actinopteri	Tetraodontiformes	Tetraodontidae	GCA_015343265.1	1.8	4.36757e+08	NA	NA	NA	NA	NA	NA	800	0.0540038	0.429673	0.125686	894	0.128237	1.22162	0.104973	0.174825	0.746341	0.188372	0.184446	0.814472	0.105824	62569892	14.48	4482668	1.03	1312	NA	1865004	0.43	1468	NA	11270668	2.6	241620	0.05	400	NA	43353184	10.03	1353568	0.31
Actinopteri	Takifugu_bimaculatus	433685	Chordata	Actinopteri	Tetraodontiformes	Tetraodontidae	GCA_004026145.2	5.7	4.95179e+08	NA	NA	NA	NA	NA	NA	548	0.00595166	0.0259563	0.229295	NA	NA	NA	NA	0.00975076	0.70009	0.241296	0.00856783	0.632003	0.162304	75402532	15.33	3681756	0.74	10576	NA	3998460	0.81	31672	NA	8207924	1.66	845408	0.17	5496	NA	58139668	11.82	481572	0.09
Actinopteri	Takifugu_flavidus	433684	Chordata	Actinopteri	Tetraodontiformes	Tetraodontidae	GCA_003711565.2	1.2	4.49156e+08	NA	NA	NA	NA	NA	NA	475	0.00482855	0.0325341	0.148415	NA	NA	NA	NA	0.00975076	0.507651	0.257205	0.00856783	0.510882	0.166873	68281176	15.31	3301804	0.74	6620	NA	3702740	0.83	34892	NA	5818884	1.3	347564	0.07	1052	NA	54612936	12.24	454684	0.1
Actinopteri	Takifugu_rubripes	31033	Chordata	Actinopteri	Tetraodontiformes	Tetraodontidae	GCA_901000725.3	3.8	4.70748e+08	NA	NA	NA	NA	NA	NA	593	0.00537029	0.0238365	0.225297	NA	NA	NA	NA	0.0176938	0.401775	0.234865	0.0170977	0.377872	0.164433	47192952	10.09	2703312	0.57	1620	NA	1917184	0.41	78988	0.01	5212376	1.11	224500	0.04	5948	NA	35562404	7.6	1486620	0.31
Actinopteri	Thamnaconus_septentrionalis	435163	Chordata	Actinopteri	Tetraodontiformes	Monacanthidae	GCA_009823395.1	0.9	5.79899e+08	NA	NA	NA	NA	NA	NA	778	0.128471	1.39191	0.0922979	871	0.125979	1.40222	0.0898423	0.328503	1.4317	0.121742	0.329009	1.35847	0.0855826	NA	NA	NA	NA	NA	NA	NA	NA	NA	NA	NA	NA	NA	NA	NA	NA	NA	NA	NA	NA
Actinopteri	Cheilinus_undulatus	241271	Chordata	Actinopteri	Labriformes	Labridae	GCA_018320785.1	1.9	1.42611e+09	32	FishBase	191000	FishBase	3.46574	12.16	807	0.0644029	0.709601	0.0907593	897	0.0633787	0.711004	0.0891396	0.318641	0.70302	0.144008	0.293732	0.713037	0.0704361	476979000	33.68	102319352	7.22	1582624	0.11	5019552	0.35	88304	NA	20105988	1.41	2739580	0.19	20332	NA	341764280	24.13	3338988	0.23
Actinopteri	Thalassoma_bifasciatum	76338	Chordata	Actinopteri	Labriformes	Labridae	GCA_008086565.1	21.9	1.33224e+09	3	AnAge	NA	NA	1.09861	NA	639	0.0831918	0.917941	0.0906287	718	0.0810611	0.922038	0.0879151	0.318641	1.01191	0.124818	0.293732	1.08209	0.0649379	NA	NA	NA	NA	NA	NA	NA	NA	NA	NA	NA	NA	NA	NA	NA	NA	NA	NA	NA	NA
Actinopteri	Symphodus_melops	171736	Chordata	Actinopteri	Labriformes	Labridae	GCA_002819105.1	3.7	7.49659e+08	9	AnAge	NA	NA	2.19722	NA	752	0.0772655	0.724615	0.10663	836	0.0758274	0.730827	0.103755	0.341669	0.733519	0.149043	0.327803	0.659815	0.0916671	165004092	22.1	7397940	0.99	1472456	0.19	5449308	0.73	80352	0.01	10480464	1.4	1114768	0.14	44032	NA	137830604	18.46	1134168	0.15
Actinopteri	Callionymus_lyra	34785	Chordata	Actinopteri	Syngnathiformes	Callionymidae	GCA_016630915.1	1	6.94151e+08	7	AnAge	NA	NA	1.94591	NA	801	0.0983897	0.971163	0.101311	897	0.0963674	0.985598	0.0977756	0.17178	1.82039	0.134501	0.191075	1.49769	0.0979612	135914696	19.79	7361560	1.07	2356	NA	4771856	0.69	190644	0.02	19630216	2.85	11368	NA	40456	NA	99609900	14.5	4296340	0.62
Actinopteri	Synchiropus_splendidus	270530	Chordata	Actinopteri	Syngnathiformes	Callionymidae	GCA_019776025.1	0.9	5.90328e+08	NA	NA	NA	NA	NA	NA	796	0.0670428	0.748038	0.0896248	893	0.0661783	0.754988	0.0876548	0.17178	1.60094	0.0945601	0.191075	1.31287	0.0698241	53981252	9.2	4185120	0.71	3760	NA	1942228	0.33	67908	0.01	3533448	0.6	67224	0.01	6020	NA	42977704	7.33	1197840	0.2
Actinopteri	Hippocampus_abdominalis	109274	Chordata	Actinopteri	Syngnathiformes	Syngnathidae	GCA_018466805.1	0.9	567240000	NA	NA	NA	NA	NA	NA	806	0.0644479	0.530596	0.121463	905	0.064209	0.547749	0.117223	0.178273	0.997612	0.173281	0.142952	1.09479	0.132184	NA	NA	NA	NA	NA	NA	NA	NA	NA	NA	NA	NA	NA	NA	NA	NA	NA	NA	NA	NA
Actinopteri	Syngnathus_acus	161584	Chordata	Actinopteri	Syngnathiformes	Syngnathidae	GCA_901709675.2	1.4	3.98376e+08	NA	NA	NA	NA	NA	NA	798	0.0739414	0.59765	0.12372	897	0.0728861	0.609751	0.119534	0.178273	1.04007	0.192134	0.142952	1.43756	0.106251	74070468	18.72	8040196	2.03	30220	NA	2452948	0.62	52660	0.01	10295260	2.6	404968	0.1	516	NA	51601956	13.04	1191744	0.3
Actinopteri	Euthynnus_affinis	8227	Chordata	Actinopteri	Scombriformes	Scombridae	GCA_019973915.1	1.9	9.23552e+08	10	AnAge	7700	AnAge	2.30259	8.94898	788	0.0263813	0.268189	0.0983682	881	0.0617358	0.541894	0.113926	0.319511	0.229535	0.143256	0.34864	0.274358	0.0783326	108935872	11.87	6597388	0.71	1457792	0.15	1428592	0.15	89692	NA	5498116	0.59	154076	0.01	5276	NA	92181192	10.05	1523748	0.16
Actinopteri	Thunnus_albacares	8236	Chordata	Actinopteri	Scombriformes	Scombridae	GCA_914725855.1	1.5	880200000	9	AnAge	200000	FishBase	2.19722	12.2061	710	0.00747063	0.0586204	0.127441	NA	NA	NA	NA	0.0903443	0.111889	0.169156	0.116477	0.126847	0.0906489	117082196	13.39	10350496	1.18	2371896	0.27	1420568	0.16	192644	0.02	6843124	0.78	358636	0.04	8684	NA	93064120	10.64	2472028	0.28
Actinopteri	Thunnus_orientalis	8238	Chordata	Actinopteri	Scombriformes	Scombridae	GCA_009176245.1	4.3	9.57868e+08	15	FishBase	450000	FishBase	2.70805	13.017	672	0.0110562	0.0582413	0.189833	NA	NA	NA	NA	0.0903443	0.207991	0.208705	0.116477	0.157919	0.142537	197512224	20.77	15681516	1.64	3882244	0.4	1693296	0.17	28156	NA	12300960	1.29	325900	0.03	816	NA	161664224	17	1935112	0.2
Actinopteri	Bostrychus_sinensis	86224	Chordata	Actinopteri	Gobiiformes	Eleotridae	GCA_018703735.1	1.3	1.05307e+09	NA	NA	NA	NA	NA	NA	810	0.0567038	0.610582	0.0928685	909	0.0557887	0.620288	0.08994	0.197048	0.894926	0.137454	0.195434	1.11418	0.0660805	386177996	36.92	44867664	4.29	631996	0.06	8986788	0.85	31652	NA	26335436	2.51	2220004	0.21	139736	0.01	299200776	28.61	3763944	0.35
Actinopteri	Mugilogobius_chulae	88201	Chordata	Actinopteri	Gobiiformes	Gobiidae	GCA_016735935.1	1.3	1.22023e+09	NA	NA	NA	NA	NA	NA	787	0.0621198	0.750679	0.0827515	882	0.0613347	0.759432	0.0807639	0.0781658	3.34767	0.0992121	0.078847	3.0767	0.0643128	467115612	38.53	38929168	3.21	1465852	0.12	10819036	0.89	44432	NA	21544128	1.77	10358084	0.85	14132	NA	374114660	30.86	9826120	0.81
Actinopteri	Rhinogobius_similis	1263952	Chordata	Actinopteri	Gobiiformes	Gobiidae	GCA_019453435.1	1.3	1.08314e+09	NA	NA	NA	NA	NA	NA	795	0.0471301	0.488089	0.0965606	889	0.0459832	0.490733	0.093703	0.0781658	1.86415	0.139563	0.078847	2.15308	0.0785932	357595336	33.25	23434936	2.17	1357268	0.12	17971512	1.67	89148	NA	28197332	2.62	1452356	0.13	129692	0.01	278093496	25.85	6869596	0.63
Actinopteri	Periophthalmus_modestus	146921	Chordata	Actinopteri	Gobiiformes	Gobiidae	GCA_019594935.1	3.9	1.03996e+09	NA	NA	NA	NA	NA	NA	778	0.055601	0.630878	0.0881327	862	0.0550829	0.631791	0.0871853	0.0935426	2.03305	0.134884	0.0962339	2.59825	0.0593848	201185288	19.48	23045596	2.23	1063076	0.1	4622356	0.44	358048	0.03	13073348	1.26	1839168	0.17	488	NA	152458408	14.76	4724800	0.45
Actinopteri	Siphamia_tubifer	1536898	Chordata	Actinopteri	Kurtiformes	Apogonidae	GCA_020466265.1	7.4	1.45924e+09	NA	NA	NA	NA	NA	NA	766	0.0553387	0.498608	0.110986	861	0.0548254	0.507046	0.108127	0.253744	0.473179	0.163925	0.251928	0.784198	0.0801352	522719500	36.07	57158624	3.94	3971620	0.27	14934444	1.03	105744	NA	35314116	2.43	5612860	0.38	158564	0.01	396497380	27.36	8966148	0.61
Actinopteri	Sphaeramia_orbicularis	375764	Chordata	Actinopteri	Kurtiformes	Apogonidae	GCA_902148855.1	3.1	1.63089e+09	NA	NA	NA	NA	NA	NA	806	0.0306924	0.274676	0.11174	897	0.0302388	0.275991	0.109564	0.253744	0.269289	0.177415	0.251928	0.391155	0.0727063	552924368	34.14	75355960	4.65	1827492	0.11	5255620	0.32	388440	0.02	25889396	1.59	2391968	0.14	67356	NA	429891380	26.54	11856756	0.73
Actinopteri	Thalassophryne_amazonica	390379	Chordata	Actinopteri	Batrachoidiformes	Batrachoididae	GCA_902500255.1	1.8	2.96701e+09	NA	NA	NA	NA	NA	NA	797	0.150187	1.2927	0.116181	901	0.146924	1.31054	0.11211	0.551582	0.695136	0.168706	0.568439	0.763404	0.0979487	1579907384	53.62	207013492	7.02	2884060	0.09	84103064	2.85	3923952	0.13	237396752	8.05	8366368	0.28	1904512	0.06	1021672168	34.67	12643016	0.42
Actinopteri	Myripristis_murdjan	586833	Chordata	Actinopteri	Holocentriformes	Holocentridae	GCA_902150065.1	2.3	1.01676e+09	NA	NA	NA	NA	NA	NA	806	0.0800375	0.756444	0.105808	896	0.0794434	0.76881	0.103333	0.665228	0.384119	0.146276	0.652265	0.400618	0.082723	125782596	12.45	16457940	1.62	1227060	0.12	3251192	0.32	390428	0.03	8429196	0.83	604656	0.05	31976	NA	93311480	9.24	2078668	0.2
Actinopteri	Gadus_morhua	8049	Chordata	Actinopteri	Gadiformes	Gadidae	GCA_902167405.1	2	909540000	25	AnAge	52800	AnAge	3.21888	10.8743	794	0.173903	1.70788	0.101824	891	0.17041	1.74191	0.0978294	0.776871	0.825287	0.124139	0.778705	0.693723	0.100088	189566464	20.99	16379628	1.81	892048	0.09	9127432	1.01	1344384	0.14	12555140	1.39	1201828	0.13	32552	NA	140902768	15.6	7130684	0.78
Actinopteri	Mallotus_villosus	30960	Chordata	Actinopteri	Osmeriformes	Salangidae	GCA_903064625.1	6	5.99952e+08	10	AnAge	52	FishBase	2.30259	3.95124	736	0.045852	0.385237	0.119023	819	0.0455252	0.394524	0.115393	0.238324	0.417442	0.195579	0.298416	0.400412	0.0841151	NA	NA	NA	NA	NA	NA	NA	NA	NA	NA	NA	NA	NA	NA	NA	NA	NA	NA	NA	NA
Actinopteri	Plecoglossus_altivelis	61084	Chordata	Actinopteri	Osmeriformes	Plecoglossidae	GCA_019972215.1	3.2	5.49393e+08	3	AnAge	NA	NA	1.09861	NA	782	0.0390428	0.435689	0.0896116	872	0.0385496	0.44189	0.087238	0.238324	0.557944	0.123325	0.298416	0.492768	0.0555681	89457452	16.44	2146008	0.39	NA	NA	557976	0.1	97068	0.01	5236444	0.96	549212	0.1	543156	0.09	79685836	14.64	641752	0.11
Actinopteri	Protosalanx_chinensis	240822	Chordata	Actinopteri	Osmeriformes	Salangidae	GCA_010882115.1	3.2	5.70681e+08	NA	NA	NA	NA	NA	NA	781	0.0477526	0.469461	0.101718	867	0.0467709	0.475702	0.0983198	0.30231	0.472913	0.154327	0.400387	0.392717	0.075591	71988880	12.7	10850508	1.91	151896	0.02	1991692	0.35	307772	0.05	6649848	1.17	314492	0.05	90192	0.01	48717912	8.59	2914568	0.51
Actinopteri	Oncorhynchus_gorbuscha	8017	Chordata	Actinopteri	Salmoniformes	Salmonidae	GCA_017355495.1	44.1	2513460000	3	AnAge	3740	AnAge	1.09861	8.22684	439	0.0100563	0.0731514	0.137473	NA	NA	NA	NA	NA	NA	NA	NA	NA	NA	NA	NA	NA	NA	NA	NA	NA	NA	NA	NA	NA	NA	NA	NA	NA	NA	NA	NA	NA	NA
Actinopteri	Oncorhynchus_keta	8018	Chordata	Actinopteri	Salmoniformes	Salmonidae	GCA_012931545.1	37.7	2435220000	7	AnAge	8745	AnAge	1.94591	9.07624	404	0.0130717	0.0896116	0.14587	NA	NA	NA	NA	NA	NA	NA	NA	NA	NA	529151052	21.87	46573284	1.92	12487936	0.51	7301804	0.3	1222876	0.05	37199408	1.53	1191884	0.04	99932	NA	404753784	16.73	18320144	0.75
Actinopteri	Oncorhynchus_nerka	8023	Chordata	Actinopteri	Salmoniformes	Salmonidae	GCA_006149115.1	40.5	2801970000	8	AnAge	4240.5	AnAge	2.07944	8.35244	401	0.00812382	0.0586057	0.138618	NA	NA	NA	NA	NA	NA	NA	NA	NA	NA	1523333520	54.6	172608236	6.18	9614200	0.34	46851180	1.67	1137108	0.04	179783164	6.44	3130772	0.11	304040	0.01	1091667852	39.13	18236968	0.65
Actinopteri	Oncorhynchus_mykiss	8022	Chordata	Actinopteri	Salmoniformes	Salmonidae	GCA_013265735.3	49.9	2630820000	11	AnAge	12235	AnAge	2.3979	9.41206	406	0.0101888	0.0814788	0.125048	461	0.121862	1.1667	0.104451	NA	NA	NA	NA	NA	NA	NA	NA	NA	NA	NA	NA	NA	NA	NA	NA	NA	NA	NA	NA	NA	NA	NA	NA	NA	NA
Actinopteri	Oncorhynchus_kisutch	8019	Chordata	Actinopteri	Salmoniformes	Salmonidae	GCA_002021735.2	48.6	2542800000	5	AnAge	8360	AnAge	1.60944	9.03121	404	0.00803695	0.0542375	0.148181	NA	NA	NA	NA	NA	NA	NA	NA	NA	NA	877177252	34.74	127068344	5.03	21197576	0.83	13423428	0.53	818256	0.03	95862332	3.79	2502628	0.09	852812	0.03	596993928	23.64	18457948	0.73
Actinopteri	Oncorhynchus_tshawytscha	74940	Chordata	Actinopteri	Salmoniformes	Salmonidae	GCA_018296145.1	42.5	2396100000	9	AnAge	33770	AnAge	2.19722	10.4273	450	0.00979114	0.0695315	0.140816	NA	NA	NA	NA	0.820013	0.394995	0.159211	0.825963	0.521297	0.0773913	NA	NA	NA	NA	NA	NA	NA	NA	NA	NA	NA	NA	NA	NA	NA	NA	NA	NA	NA	NA
Actinopteri	Salmo_trutta	8032	Chordata	Actinopteri	Salmoniformes	Salmonidae	GCA_901001165.2	53.6	2.87658e+09	38	AnAge	50000	FishBase	3.63759	10.8198	386	0.0172999	0.123543	0.140032	NA	NA	NA	NA	NA	NA	NA	NA	NA	NA	1175051728	41.14	183518060	6.42	6208100	0.21	27319016	0.95	1109760	0.03	125299988	4.38	4064688	0.14	140288	NA	803799872	28.14	23591956	0.82
Actinopteri	Salvelinus_namaycush	8040	Chordata	Actinopteri	Salmoniformes	Salmonidae	GCA_016432855.1	48.3	2973120000	50	AnAge	17985	AnAge	3.91202	9.79729	355	0.0082092	0.0561986	0.146075	NA	NA	NA	NA	NA	NA	NA	NA	NA	NA	NA	NA	NA	NA	NA	NA	NA	NA	NA	NA	NA	NA	NA	NA	NA	NA	NA	NA	NA	NA
Actinopteri	Salvelinus_sp._IW2-2015	2691554	Chordata	Actinopteri	Salmoniformes	Salmonidae	GCA_002910315.2	39.6	2.6317e+09	NA	NA	NA	NA	NA	NA	393	0.0162712	0.117889	0.138022	NA	NA	NA	NA	NA	NA	NA	NA	NA	NA	1509145124	57.59	223998452	8.54	691788	0.02	44514664	1.69	777008	0.02	171748104	6.55	2907588	0.11	155560	NA	1049205748	40.04	15146212	0.57
Actinopteri	Arapaima_gigas	113544	Chordata	Actinopteri	Osteoglossiformes	Osteoglossidae	GCA_900497675.1	6.6	792180000	NA	NA	200000	FishBase	NA	12.2061	762	0.0491115	0.516831	0.0950245	856	0.0482871	0.525298	0.0919233	0.323476	0.455114	0.140077	0.308087	0.537374	0.0758732	128319768	16.27	13848016	1.75	349900	0.04	3214716	0.4	22628	NA	3000480	0.38	897596	0.11	10060	NA	106268008	13.47	708364	0.08
Actinopteri	Heterotis_niloticus	91721	Chordata	Actinopteri	Osteoglossiformes	Osteoglossidae	GCA_018136845.1	7.4	8.17763e+08	NA	NA	NA	NA	NA	NA	753	0.0524944	0.564714	0.0929575	849	0.0515941	0.575711	0.089618	0.323476	0.533491	0.144797	0.308087	0.614564	0.0683424	90796372	11.22	11553616	1.42	24172	NA	2387216	0.29	6308	NA	8568860	1.05	646440	0.07	2620	NA	60100996	7.42	7506144	0.92
Actinopteri	Scleropages_formosus	113540	Chordata	Actinopteri	Osteoglossiformes	Osteoglossidae	GCA_900964775.1	7.1	9.55407e+08	NA	NA	NA	NA	NA	NA	743	0.0660668	0.705065	0.0937032	838	0.0640979	0.712586	0.0899512	0.490413	0.430094	0.136571	0.470376	0.539442	0.0567069	195558300	20.61	35320740	3.72	337800	0.03	8814272	0.92	956236	0.1	24991732	2.63	6570304	0.69	325212	0.03	108305584	11.41	9936420	1.04
Actinopteri	Gymnarchus_niloticus	42648	Chordata	Actinopteri	Osteoglossiformes	Gymnarchidae	GCA_009936485.1	5.1	7.97338e+08	NA	NA	NA	NA	NA	NA	715	0.126447	1.42121	0.088971	810	0.122194	1.44446	0.0845949	0.853015	0.532525	0.116281	0.847368	0.588153	0.0676038	148757400	18.78	11455704	1.44	125668	0.01	2938960	0.37	3264	NA	14080540	1.77	450276	0.05	2712	NA	117174124	14.79	2526152	0.31
Actinopteri	Lepisosteus_oculatus	7918	Chordata	Actinopteri	Semionotiformes	Lepisosteidae	GCA_000242695.1	0.4	1359420000	18	AnAge	2442	AnAge	2.89037	7.80057	731	0.0945934	1.08973	0.0868046	834	0.0933494	1.13562	0.0822014	1	0.666276	0.0983634	1	0.725159	0.0600739	286847676	21.32	9293868	0.69	279012	0.02	5512088	0.4	14980	NA	15067424	1.12	16246068	1.2	NA	NA	233917436	17.39	6516408	0.48
Mammalia	Acomys_russatus	60746	Chordata	Mammalia	Rodentia	Muridae	GCA_903995435.1	7.8	2.79142e+09	NA	NA	42.4	Pantheria	NA	3.74715	756	0.0512275	0.414471	0.123597	856	0.0503726	0.42437	0.1187	0.335967	0.403337	0.125552	0.270873	0.494468	0.109082	603505228	21.77	6241588	0.22	18712	NA	82855112	2.98	670716	0.02	207917660	7.5	81663168	2.94	3486576	0.12	156785520	5.65	63858256	2.3
Mammalia	Grammomys_surdaster	491861	Chordata	Mammalia	Rodentia	Muridae	GCA_004785775.1	15.3	2.92594e+09	NA	NA	NA	NA	NA	NA	686	0.0313017	0.239539	0.130675	773	0.0305279	0.241589	0.126363	0.205486	0.346057	0.127484	0.161336	0.52944	0.100911	656995084	22.61	6207468	0.21	22060	NA	153633836	5.28	843816	0.02	164708600	5.66	52310456	1.8	2946984	0.1	268850568	9.25	7464960	0.25
Mammalia	Mus_minutoides	10105	Chordata	Mammalia	Rodentia	Muridae	GCA_902729485.2	9.2	3.43624e+09	3.1	Pantheria	6.44	Pantheria	1.1314	1.86253	722	0.0364076	0.285543	0.127503	822	0.0356269	0.287316	0.123999	0.205486	0.396494	0.131003	0.161336	0.599262	0.108956	1085542336	31.72	17800104	0.52	71152	NA	230757620	6.74	983464	0.02	266842180	7.79	115061276	3.36	6480632	0.18	441420692	12.9	6095120	0.17
Mammalia	Rattus_norvegicus	10116	Chordata	Mammalia	Rodentia	Muridae	GCA_015227675.2	11.7	2982900000	3.8	AnAge	283	Pantheria	1.335	5.64545	720	0.038022	0.318586	0.119346	808	0.0379337	0.324101	0.117043	0.23077	0.489081	0.131982	0.176727	0.517277	0.0996388	642935628	21.7	6924868	0.23	12012	NA	120948568	4.08	1931360	0.06	308902944	10.42	69834512	2.35	2682600	0.09	126083856	4.25	5569420	0.18
Mammalia	Arvicola_amphibius	1047088	Chordata	Mammalia	Rodentia	Cricetidae	GCA_903992535.2	11.4	2.78688e+09	2.5	AnAge	120	AnAge	0.916291	4.78749	713	0.0169389	0.118018	0.143528	NA	NA	NA	NA	0.118496	0.327011	0.131323	0.101968	0.364373	0.120026	525901804	19	6257672	0.22	18292	NA	191556952	6.92	366484	0.01	119261996	4.3	69085152	2.49	3425196	0.12	131688956	4.75	4234372	0.15
Mammalia	Microtus_agrestis	29092	Chordata	Mammalia	Rodentia	Cricetidae	GCA_902806775.1	14.4	3344760000	3.3	Pantheria	35.9	Pantheria	1.19392	3.58074	694	0.0110829	0.0668406	0.165811	NA	NA	NA	NA	0.064509	0.290961	0.145321	0.0532136	0.425986	0.129909	NA	NA	NA	NA	NA	NA	NA	NA	NA	NA	NA	NA	NA	NA	NA	NA	NA	NA	NA	NA
Mammalia	Microtus_oregoni	111838	Chordata	Mammalia	Rodentia	Cricetidae	GCA_018167655.1	20.9	2885100000	1.25	Pantheria	20.4	Pantheria	0.223144	3.01553	626	0.0112839	0.064274	0.175559	NA	NA	NA	NA	0.064509	0.314605	0.146442	0.0532136	0.401709	0.119725	NA	NA	NA	NA	NA	NA	NA	NA	NA	NA	NA	NA	NA	NA	NA	NA	NA	NA	NA	NA
Mammalia	Microtus_fortis	100897	Chordata	Mammalia	Rodentia	Cricetidae	GCA_014885135.1	11.1	2.65582e+09	NA	NA	NA	NA	NA	NA	706	0.0117366	0.0723016	0.162329	NA	NA	NA	NA	0.0707993	0.316464	0.17221	0.0628857	0.305615	0.140303	NA	NA	NA	NA	NA	NA	NA	NA	NA	NA	NA	NA	NA	NA	NA	NA	NA	NA	NA	NA
Mammalia	Myodes_glareolus	447135	Chordata	Mammalia	Rodentia	Cricetidae	GCA_004368595.1	11	2.90605e+09	4.9	AnAge	20.8	AnAge	1.58924	3.03495	565	0.0214593	0.139135	0.154234	638	0.0244868	0.183367	0.13354	0.139636	0.322958	0.143887	0.120673	0.374483	0.131234	NA	NA	NA	NA	NA	NA	NA	NA	NA	NA	NA	NA	NA	NA	NA	NA	NA	NA	NA	NA
Mammalia	Ondatra_zibethicus	10060	Chordata	Mammalia	Rodentia	Cricetidae	GCA_004026605.1	7.7	2718840000	10	Pantheria	992	Pantheria	2.30259	6.89972	700	0.0174673	0.113873	0.153393	789	0.0238419	0.171263	0.139212	0.158931	0.2149	0.150644	0.136268	0.295575	0.147537	NA	NA	NA	NA	NA	NA	NA	NA	NA	NA	NA	NA	NA	NA	NA	NA	NA	NA	NA	NA
Mammalia	Sigmodon_hispidus	42415	Chordata	Mammalia	Rodentia	Cricetidae	GCA_004025045.1	19	3872880000	5.2	Pantheria	111	Pantheria	1.64866	4.70953	650	0.0502434	0.368789	0.136239	725	0.0484666	0.368694	0.131455	0.296735	0.376912	0.125255	0.241217	0.558767	0.102809	1424889908	36.95	20404932	0.52	130144	NA	381291300	9.88	478212	0.01	283582480	7.35	135523776	3.51	10393748	0.26	587260176	15.22	5793460	0.15
Mammalia	Onychomys_torridus	38674	Chordata	Mammalia	Rodentia	Cricetidae	GCA_903995425.1	8	2.99339e+09	4.6	Pantheria	21.7	Pantheria	1.52606	3.07731	742	0.0234115	0.161766	0.144724	837	0.0249339	0.175403	0.142152	0.185779	0.273977	0.151489	0.153014	0.323296	0.134572	NA	NA	NA	NA	NA	NA	NA	NA	NA	NA	NA	NA	NA	NA	NA	NA	NA	NA	NA	NA
Mammalia	Peromyscus_eremicus	42410	Chordata	Mammalia	Rodentia	Cricetidae	GCA_902702925.1	8.1	3.2901e+09	7.4	AnAge	22.7	Pantheria	2.00148	3.12236	687	0.0153477	0.0977782	0.156965	NA	NA	NA	NA	0.127423	0.206361	0.16589	0.106925	0.297438	0.120401	1092597148	33.42	13404488	0.41	59300	NA	314603824	9.62	203208	NA	195433636	5.97	116366808	3.56	7333032	0.22	375017272	11.47	70142712	2.14
Mammalia	Peromyscus_leucopus	10041	Chordata	Mammalia	Rodentia	Cricetidae	GCA_004664715.2	11.4	3.00161e+09	3.16667	Pantheria	18.1	Pantheria	1.15268	2.89591	706	0.0171346	0.133936	0.127931	800	0.0210678	0.178756	0.117858	0.127423	0.244282	0.147104	0.106925	0.446953	0.111601	786009752	26.44	6880960	0.23	11152	NA	246531240	8.29	99264	NA	129715084	4.36	69240620	2.32	5926800	0.19	326357748	10.98	1238964	0.04
Mammalia	Mesocricetus_auratus	10036	Chordata	Mammalia	Rodentia	Cricetidae	GCA_017639785.1	7.3	3354540000	10	Pantheria	98.6	Pantheria	2.30259	4.59107	755	0.0421522	0.340929	0.123639	856	0.0421742	0.347056	0.12152	0.319252	0.341386	0.127421	0.257102	0.443927	0.105716	NA	NA	NA	NA	NA	NA	NA	NA	NA	NA	NA	NA	NA	NA	NA	NA	NA	NA	NA	NA
Mammalia	Cricetomys_gambianus	10085	Chordata	Mammalia	Rodentia	Nesomyidae	GCA_004027575.1	1.7	2.90786e+09	8.4	AnAge	1270	Pantheria	2.12823	7.14677	775	0.0444953	0.355839	0.125043	883	0.0439584	0.359999	0.122107	0.40122	0.275575	0.12498	0.333793	0.388957	0.109379	759377236	26.23	23615500	0.81	104364	NA	163238364	5.63	553460	0.01	123840596	4.27	123000136	4.24	1289172	0.04	319170328	11.02	4541556	0.15
Mammalia	Castor_canadensis	51338	Chordata	Mammalia	Rodentia	Castoridae	GCA_001984765.1	6.5	3.0538e+09	15	Pantheria	18100	Pantheria	2.70805	9.80367	718	0.0587152	0.432277	0.135828	814	0.057654	0.436176	0.132181	0.645716	0.17212	0.153264	0.555785	0.340523	0.108431	833319356	27.47	10323696	0.34	13048	NA	99660524	3.28	971188	0.03	324723128	10.7	123904544	4.08	14208	NA	271412920	8.94	2266796	0.07
Mammalia	Dipodomys_spectabilis	105255	Chordata	Mammalia	Rodentia	Heteromyidae	GCA_019054845.1	8.8	3.44893e+09	3	Pantheria	125	Pantheria	1.09861	4.82831	744	0.0826037	0.699951	0.118013	831	0.0802977	0.697964	0.115046	0.645716	0.282609	0.131819	0.555785	0.470515	0.105586	NA	NA	NA	NA	NA	NA	NA	NA	NA	NA	NA	NA	NA	NA	NA	NA	NA	NA	NA	NA
Mammalia	Cavia_tschudii	143287	Chordata	Mammalia	Rodentia	Caviidae	GCA_004027695.1	4.9	4449900000	6.3	AnAge	1000	Pantheria	1.84055	6.90776	715	0.0319497	0.245194	0.130304	812	0.0318129	0.249052	0.127736	0.225179	0.26292	0.142842	0.201523	0.492597	0.103561	1690950456	38.16	57303828	1.29	69712	NA	281022476	6.34	216396	NA	554041120	12.5	141710432	3.19	1145448	0.02	650252180	14.67	5132236	0.11
Mammalia	Hydrochoerus_hydrochaeris	10149	Chordata	Mammalia	Rodentia	Hydrochaeridae	GCA_004027455.1	4.2	3.31558e+09	15.1	AnAge	55000	AnAge	2.71469	10.9151	742	0.0296543	0.202583	0.146381	839	0.0297583	0.206533	0.144085	0.225179	0.19718	0.161696	0.201523	0.400382	0.133872	1261952924	38.22	37035548	1.12	32388	NA	168614364	5.1	116644	NA	557561384	16.88	80460696	2.43	262956	NA	396761848	12.01	21075812	0.63
Mammalia	Chinchilla_lanigera	34839	Chordata	Mammalia	Rodentia	Chinchillidae	GCA_000276665.1	5	2.89956e+09	11.3	Pantheria	480	Pantheria	2.4248	6.17379	740	0.0289612	0.209468	0.138261	836	0.0283668	0.215025	0.131923	0.242678	0.25083	0.152699	0.205515	0.34358	0.120756	623172224	21.72	14117036	0.49	158928	NA	92245924	3.21	1380	NA	240600788	8.38	60228812	2.1	9756784	0.34	204770876	7.13	1290908	0.04
Mammalia	Dinomys_branickii	108858	Chordata	Mammalia	Rodentia	Dinomyidae	GCA_004027595.1	6.9	3.25987e+09	9.4	Pantheria	12500	Pantheria	2.24071	9.43348	691	0.0401518	0.288467	0.13919	783	0.0401727	0.292287	0.137442	0.242678	0.352422	0.147401	0.205515	0.50004	0.126451	1098827444	33.85	45518236	1.4	38708	NA	157678300	4.85	2718156	0.08	338607264	10.43	82981476	2.55	9210076	0.28	444631640	13.69	17412700	0.53
Mammalia	Erethizon_dorsatum	34844	Chordata	Mammalia	Rodentia	Erethizontidae	GCA_006547115.1	5.7	2.95485e+09	18	Pantheria	7420	Pantheria	2.89037	8.91193	760	0.0318744	0.200852	0.158696	857	0.0316168	0.204478	0.154622	0.367179	0.144634	0.180948	0.305393	0.288411	0.126913	659167380	22.46	31293360	1.06	32516	NA	111984804	3.81	2196004	0.07	199868772	6.81	110362272	3.76	18300	NA	191312480	6.52	12088576	0.41
Mammalia	Hystrix_cristata	10137	Chordata	Mammalia	Rodentia	Hystricidae	GCA_004026905.1	5.2	2.99645e+09	28	AnAge	13400	Pantheria	3.3322	9.50301	708	0.0494463	0.34574	0.143016	790	0.0492182	0.352706	0.139545	0.486604	0.203724	0.15339	0.414387	0.31984	0.119784	867554636	29.07	46986900	1.57	90244	NA	112875700	3.78	187832	NA	214274440	7.18	81609172	2.73	20740	NA	409003980	13.7	2430784	0.08
Mammalia	Ctenodactylus_gundi	10166	Chordata	Mammalia	Rodentia	Ctenodactylidae	GCA_004027205.1	2.8	2.81678e+09	5.8	AnAge	289	Pantheria	1.75786	5.66643	774	0.0836827	0.689457	0.121375	877	0.0824669	0.702218	0.117438	0.636421	0.292921	0.140594	0.55954	0.464405	0.12752	718283508	25.61	23946588	0.85	120728	NA	111233288	3.96	126332	NA	163212036	5.81	136672420	4.87	24348	NA	279415748	9.96	3494004	0.12
Mammalia	Cynomys_gunnisoni	45479	Chordata	Mammalia	Rodentia	Sciuridae	GCA_011316645.1	9.9	3.24269e+09	NA	NA	798	Pantheria	NA	6.68211	677	0.00805382	0.0421013	0.191296	NA	NA	NA	NA	0.134169	0.0732349	0.209833	0.105067	0.201456	0.151137	1158506756	35.96	15673136	0.48	73152	NA	152326996	4.72	207344	NA	244330772	7.58	92374328	2.86	217188	NA	645017160	20.02	8273216	0.25
Mammalia	Urocitellus_parryii	9999	Chordata	Mammalia	Rodentia	Sciuridae	GCA_003426925.1	5.5	3.05646e+09	NA	NA	NA	NA	NA	NA	690	0.00644696	0.037673	0.171129	NA	NA	NA	NA	0.134169	0.0662221	0.184149	0.105067	0.186558	0.129343	1031216156	33.97	13004576	0.42	57976	NA	108805092	3.58	72244	NA	227534308	7.49	94447280	3.11	155820	NA	579267772	19.08	7856832	0.25
Mammalia	Marmota_flaviventris	93162	Chordata	Mammalia	Rodentia	Sciuridae	GCA_003676075.2	7.9	3.13011e+09	8	Pantheria	3710	Pantheria	2.07944	8.21879	542	0.00307389	0.0158023	0.194522	NA	NA	NA	NA	0.0912251	0.0275041	0.242539	0.0783029	0.0906634	0.146598	660818388	21.25	5582292	0.17	19472	NA	117790104	3.78	145748	NA	230155548	7.4	93124928	2.99	212604	NA	132360508	4.25	81417680	2.61
Mammalia	Marmota_himalayana	93163	Chordata	Mammalia	Rodentia	Sciuridae	GCA_005280165.1	6.4	2.9974e+09	NA	NA	NA	NA	NA	NA	578	0.00605214	0.0215047	0.281433	NA	NA	NA	NA	0.0742027	0.0392923	0.269616	0.0655946	0.13091	0.161817	636411492	21.42	6537160	0.22	14452	NA	138853328	4.67	101008	NA	258005180	8.68	93255044	3.13	175484	NA	105216448	3.54	34247844	1.15
Mammalia	Marmota_monax	9995	Chordata	Mammalia	Rodentia	Sciuridae	GCA_014533835.1	9.4	3.31847e+09	10	Pantheria	3880	Pantheria	2.30259	8.26359	564	0.00385123	0.0175634	0.219276	NA	NA	NA	NA	0.0742027	0.0495937	0.245781	0.0655946	0.109226	0.160414	904833360	27.45	14301216	0.43	50620	NA	163893964	4.97	111740	NA	317226524	9.62	105680788	3.2	214660	NA	247031884	7.49	56297808	1.7
Mammalia	Xerus_inauris	234690	Chordata	Mammalia	Rodentia	Sciuridae	GCA_004024805.1	7.1	3.1544e+09	13	Pantheria	572	Pantheria	2.56495	6.34914	667	0.0327435	0.218699	0.14972	758	0.0374301	0.266344	0.140533	0.44315	0.120184	0.171485	0.374494	0.255704	0.129908	889323020	28.31	28458928	0.9	120184	NA	146991184	4.68	128288	NA	269224012	8.57	108250888	3.44	77052	NA	333537076	10.61	2479176	0.07
Mammalia	Sciurus_vulgaris	55149	Chordata	Mammalia	Rodentia	Sciuridae	GCA_902686455.2	15.8	3.48989e+09	12	Pantheria	333	Pantheria	2.48491	5.80814	693	0.0321433	0.234257	0.137213	782	0.037759	0.282777	0.133529	0.496762	0.104938	0.151214	0.425261	0.252211	0.116766	NA	NA	NA	NA	NA	NA	NA	NA	NA	NA	NA	NA	NA	NA	NA	NA	NA	NA	NA	NA
Mammalia	Sylvilagus_bachmani	365149	Chordata	Mammalia	Lagomorpha	Leporidae	GCA_015711505.1	10.2	3.25723e+09	NA	NA	717	Pantheria	NA	6.57508	698	0.0869251	0.766551	0.113398	786	0.0856728	0.777467	0.110195	0.748092	0.245068	0.123603	0.693849	0.428764	0.122677	1002329288	30.97	17363756	0.53	31688	NA	35011840	1.08	114856	NA	191372612	5.91	288362984	8.91	4181148	0.12	456109608	14.09	9780796	0.3
Mammalia	Alouatta_palliata	30589	Chordata	Mammalia	Primates	Atelidae	GCA_004027835.1	17	3550140000	25	Pantheria	6580	Pantheria	3.21888	8.79179	570	0.0202328	0.0924777	0.218786	648	0.020971	0.0956479	0.219252	0.292871	0.0725036	0.205023	0.291265	0.137302	0.116277	1022822912	28.94	72751172	2.05	236004	NA	154185896	4.36	332624	NA	302659508	8.56	77782752	2.2	46096	NA	382918556	10.83	31880604	0.9
Mammalia	Ateles_geoffroyi	9509	Chordata	Mammalia	Primates	Atelidae	GCA_004024785.1	12.7	3119820000	27.3	Pantheria	7610	Pantheria	3.30689	8.93722	423	0.00857999	0.0274659	0.312387	NA	NA	NA	NA	0.110195	0.0278596	0.304067	0.13298	0.0369875	0.196639	756520264	24.35	54606208	1.75	152820	NA	119669396	3.85	232060	NA	219383236	7.06	52871616	1.7	23200	NA	280554584	9.03	29009324	0.93
Mammalia	Ateles_hybridus	129801	Chordata	Mammalia	Primates	Atelidae	GCA_916098195.1	11.7	3.20506e+09	NA	NA	NA	NA	NA	NA	582	0.0149735	0.0505354	0.296298	782	0.022407	0.101672	0.220386	0.110195	0.0731218	0.423699	0.13298	0.144884	0.286847	NA	NA	NA	NA	NA	NA	NA	NA	NA	NA	NA	NA	NA	NA	NA	NA	NA	NA	NA	NA
Mammalia	Aotus_nancymaae	37293	Chordata	Mammalia	Primates	Aotidae	GCA_000952055.2	13.9	3.4694e+09	NA	NA	795	Pantheria	NA	6.67834	688	0.0164838	0.0845556	0.194947	765	0.0158607	0.0838393	0.18918	0.304937	0.0623983	0.203917	0.32463	0.136316	0.164817	849121708	24.74	23434444	0.68	35936	NA	86428348	2.51	392512	0.01	200947420	5.85	134244604	3.91	1361496	0.03	128689896	3.74	273582412	7.97
Mammalia	Callithrix_jacchus	9483	Chordata	Mammalia	Primates	Cebidae	GCA_009663435.2	15.9	3354540000	16.8	Pantheria	291	Pantheria	2.82138	5.67332	683	0.0147144	0.0854015	0.172297	771	0.019156	0.111771	0.171386	0.206999	0.0788827	0.206138	0.224185	0.188732	0.130171	558970312	16.77	23236620	0.69	35616	NA	88754940	2.66	868112	0.02	192344380	5.77	88545148	2.65	83404	NA	142567728	4.27	22522484	0.67
Mammalia	Saguinus_imperator	9491	Chordata	Mammalia	Primates	Cebidae	GCA_004024885.1	18.7	4.23437e+09	20.2	Pantheria	410	Pantheria	3.00568	6.01616	591	0.0163911	0.0800933	0.20465	NA	NA	NA	NA	0.206999	0.083703	0.233559	0.224185	0.173783	0.170622	1355813960	32.16	86761068	2.05	388492	NA	210837768	5	608592	0.01	354363948	8.4	91869156	2.17	35996	NA	598874184	14.2	12042680	0.28
Mammalia	Sapajus_apella	9515	Chordata	Mammalia	Primates	Cebidae	GCA_009761245.1	14.4	3.30906e+09	46	AnAge	2642.5	AnAge	3.82864	7.87948	685	0.0177966	0.099024	0.17972	766	0.0175229	0.0985464	0.177813	0.321718	0.0717636	0.206931	0.344606	0.137008	0.130942	734031452	22.33	24102232	0.73	57652	NA	85625312	2.6	1174940	0.03	159295156	4.84	83746048	2.54	48412	NA	270745716	8.23	109226480	3.32
Mammalia	Pithecia_pithecia	43777	Chordata	Mammalia	Primates	Pitheciidae	GCA_004026645.1	12.5	3.5564e+09	20.7	Pantheria	1670	Pantheria	3.03013	7.42058	640	0.0197818	0.101658	0.194592	722	0.0190857	0.101208	0.188579	0.396187	0.0594332	0.220015	0.415619	0.129752	0.155512	NA	NA	NA	NA	NA	NA	NA	NA	NA	NA	NA	NA	NA	NA	NA	NA	NA	NA	NA	NA
Mammalia	Cercopithecus_mona	36226	Chordata	Mammalia	Primates	Cercopithecidae	GCA_014849445.1	12.4	3.51917e+09	30	Pantheria	3980	Pantheria	3.4012	8.28904	672	0.00809104	0.0440049	0.183867	793	0.0300016	0.181001	0.165754	0.213766	0.0428804	0.214526	0.251013	0.0989555	0.176226	676011976	19.34	52077940	1.49	85680	NA	131645868	3.76	312884	NA	232244580	6.64	77018224	2.2	46768	NA	154820488	4.43	27748456	0.79
Mammalia	Macaca_fascicularis	9541	Chordata	Mammalia	Primates	Cercopithecidae	GCA_000364345.1	10.8	3374100000	38	Pantheria	4590	Pantheria	3.63759	8.43164	355	0.00327661	0.0167342	0.195804	NA	NA	NA	NA	0.0665615	0.0161943	0.227491	0.0626734	0.0538231	0.160745	548263840	16.42	20620516	0.61	4760	NA	85864456	2.57	201628	NA	181208380	5.43	138779228	4.15	13552	NA	64115032	1.92	57454388	1.72
Mammalia	Macaca_mulatta	9544	Chordata	Mammalia	Primates	Cercopithecidae	GCA_003339765.3	11.5	3511020000	36	Pantheria	6450	Pantheria	3.58352	8.77184	437	0.00297263	0.0130756	0.227342	NA	NA	NA	NA	0.0665615	0.0200015	0.253132	0.0626734	0.0683308	0.161211	679313752	19.48	49757340	1.42	86000	NA	138455196	3.97	198132	NA	246034984	7.05	78726992	2.25	86488	NA	136740584	3.92	29214176	0.83
Mammalia	Macaca_nemestrina	9545	Chordata	Mammalia	Primates	Cercopithecidae	GCA_000956065.1	9.5	3481680000	34.3	Pantheria	7870	Pantheria	3.53515	8.97081	534	0.00591619	0.0208874	0.283243	NA	NA	NA	NA	0.0863834	0.0405374	0.314194	0.105436	0.0820339	0.183295	NA	NA	NA	NA	NA	NA	NA	NA	NA	NA	NA	NA	NA	NA	NA	NA	NA	NA	NA	NA
Mammalia	Papio_anubis	9555	Chordata	Mammalia	Primates	Cercopithecidae	GCA_008728515.1	11.8	3.47925e+09	NA	NA	14480	AnimalTraits	NA	9.58052	499	0.00478076	0.0191722	0.249359	NA	NA	NA	NA	0.0867527	0.0272863	0.286068	0.119918	0.102473	0.236145	597562104	17.3	35575964	1.03	90328	NA	110050300	3.18	2644776	0.07	192675520	5.57	73250660	2.12	168296	NA	123162588	3.56	59935752	1.73
Mammalia	Theropithecus_gelada	9565	Chordata	Mammalia	Primates	Cercopithecidae	GCA_003255815.1	11	3.50323e+09	28	Pantheria	16000	Pantheria	3.3322	9.68034	534	0.00470651	0.0200239	0.235045	NA	NA	NA	NA	0.0867527	0.0650136	0.37373	0.119918	0.0579851	0.171535	544900284	15.66	35801016	1.02	54056	NA	111714676	3.21	565208	0.01	191570424	5.5	76477164	2.19	59764	NA	94367836	2.71	34280240	0.98
Mammalia	Pygathrix_nemaeus	54133	Chordata	Mammalia	Primates	Cercopithecidae	GCA_004024825.1	11.8	3.89963e+09	25	Pantheria	9550	Pantheria	3.21888	9.1643	553	0.0102502	0.0363464	0.282013	NA	NA	NA	NA	0.101289	0.0478084	0.231749	0.142996	0.103083	0.197689	1139438360	29.34	79400932	2.04	320160	NA	189279872	4.87	873232	0.02	326864508	8.41	70369228	1.81	114668	NA	445929296	11.48	26264684	0.67
Mammalia	Rhinopithecus_roxellana	61622	Chordata	Mammalia	Primates	Cercopithecidae	GCA_007565055.1	12.4	3.68338e+09	29.5	AnAge	14750	AnAge	3.38439	9.599	621	0.00689362	0.0322554	0.21372	NA	NA	NA	NA	0.101289	0.0489739	0.232199	0.142996	0.0984716	0.196896	1100938528	30.08	63192464	1.72	133700	NA	213445032	5.83	280460	NA	297920368	8.14	143712696	3.92	185536	NA	325509040	8.89	56533492	1.54
Mammalia	Gorilla_gorilla_gorilla	9595	Chordata	Mammalia	Primates	Hominidae	GCA_008122165.1	10.6	3.69112e+09	54	Pantheria	114000	Pantheria	3.98898	11.644	643	0.00687545	0.0315658	0.217813	NA	NA	NA	NA	0.220949	0.0341339	0.279835	0.221066	0.0647039	0.173522	914265724	24.95	43814068	1.19	220704	NA	123618348	3.37	585256	0.01	229951244	6.27	78822632	2.15	804216	0.02	400114068	10.91	36320932	0.99
Mammalia	Pan_paniscus	9597	Chordata	Mammalia	Primates	Hominidae	GCA_013052645.3	10.7	3.88315e+09	48	Pantheria	35200	Pantheria	3.8712	10.4688	381	0.00270016	0.0103578	0.260689	NA	NA	NA	NA	0.117693	0.0199669	0.371144	0.0710414	0.043483	0.178273	1220291068	31.56	88851488	2.29	335532	NA	190613384	4.92	392388	0.01	349611920	9.04	63009216	1.62	83472	NA	516957744	13.37	10404640	0.26
Mammalia	Pan_troglodytes	9598	Chordata	Mammalia	Primates	Hominidae	GCA_002880755.3	10.3	3383880000	60	Pantheria	45100	Pantheria	4.09434	10.7166	377	0.00301104	0.0116025	0.259517	NA	NA	NA	NA	0.117693	0.0198025	0.412039	0.0710414	0.0381294	0.193109	549240360	16.35	36659584	1.09	86468	NA	109642432	3.26	484472	0.01	205926500	6.13	96010408	2.85	1297184	0.03	73511920	2.18	25615056	0.76
Mammalia	Pongo_abelii	9601	Chordata	Mammalia	Primates	Hominidae	GCA_002880775.3	10.7	3.71554e+09	NA	NA	NA	NA	NA	NA	715	0.0128408	0.0635821	0.201956	NA	NA	NA	NA	0.352642	0.0404909	0.318455	0.353866	0.0898653	0.132599	735102580	19.91	55546600	1.5	119196	NA	111754880	3.02	74536	NA	314132832	8.51	87391928	2.36	393460	0.01	133144480	3.6	32530016	0.88
Mammalia	Hylobates_moloch	81572	Chordata	Mammalia	Primates	Hylobatidae	GCA_009828535.2	11.9	3168720000	45	AnAge	5870	Pantheria	3.80666	8.67761	625	0.00653377	0.0286033	0.228427	NA	NA	NA	NA	0.175461	0.0422717	0.287538	0.194172	0.0619455	0.175827	428071388	13.59	30185240	0.95	59996	NA	83384076	2.64	1113144	0.03	152490668	4.84	61885416	1.96	939512	0.02	80368624	2.55	17635604	0.56
Mammalia	Nomascus_leucogenys	61853	Chordata	Mammalia	Primates	Hylobatidae	GCA_006542625.1	10.7	3.44798e+09	44.1	AnAge	6000	AnAge	3.78646	8.69951	625	0.0057965	0.0302708	0.191488	NA	NA	NA	NA	0.175461	0.0347866	0.239699	0.194172	0.0723456	0.142984	NA	NA	NA	NA	NA	NA	NA	NA	NA	NA	NA	NA	NA	NA	NA	NA	NA	NA	NA	NA
Mammalia	Daubentonia_madagascariensis	31869	Chordata	Mammalia	Primates	Daubentoniidae	GCA_004027145.1	4.4	3.02973e+09	24.3	Pantheria	2750	Pantheria	3.19048	7.91936	760	0.030748	0.193751	0.158698	865	0.030032	0.19381	0.154956	0.609223	0.0651791	0.177212	0.579902	0.173834	0.127423	NA	NA	NA	NA	NA	NA	NA	NA	NA	NA	NA	NA	NA	NA	NA	NA	NA	NA	NA	NA
Mammalia	Mirza_coquereli	47180	Chordata	Mammalia	Primates	Cheirogaleidae	GCA_004024645.1	9	2.83904e+09	17.4	AnAge	311.2	AnAge	2.85647	5.74044	194	0.0131054	0.0606226	0.216179	217	0.0156564	0.068835	0.227448	0.0296544	0.105714	0.184273	0.0202034	0.106568	0.160156	612436628	21.66	63691284	2.25	138008	NA	81876256	2.89	117588	NA	235257724	8.32	36416500	1.28	12984	NA	184762976	6.53	10143904	0.35
Mammalia	Mirza_zaza	339999	Chordata	Mammalia	Primates	Cheirogaleidae	GCA_008750895.1	9	2.86141e+09	NA	NA	NA	NA	NA	NA	227	0.0181746	0.105274	0.172641	253	0.0190693	0.106873	0.17843	0.0296544	0.0480523	0.180837	0.0202034	0.0731785	0.167455	473060352	16.65	62421688	2.19	70808	NA	67341908	2.37	89592	NA	216648624	7.62	37615288	1.32	57916	NA	85491828	3	3298544	0.11
Mammalia	Aeorestes_cinereus	257879	Chordata	Mammalia	Chiroptera	Vespertilionidae	GCA_011751065.1	12.6	2.6069e+09	NA	NA	NA	NA	NA	NA	688	0.0319857	0.217207	0.147259	778	0.038308	0.286447	0.133735	0.18038	0.285912	0.162397	0.1503	0.577164	0.129539	681281388	26.31	45613116	1.76	145047700	5.6	43749384	1.69	331920	0.01	296889032	11.46	79867272	3.08	17668	NA	65430348	2.52	4334552	0.16
Mammalia	Pipistrellus_kuhlii	59472	Chordata	Mammalia	Chiroptera	Vespertilionidae	GCA_014108245.1	8.5	1995120000	8	AnAge	6.04	Pantheria	2.07944	1.7984	725	0.0145125	0.0874229	0.166003	NA	NA	NA	NA	0.0653764	0.222391	0.179161	0.0411312	0.552678	0.156053	394518864	19.91	32636156	1.64	76939180	3.88	23333616	1.17	119112	NA	95093368	4.8	61143916	3.08	15356	NA	103900028	5.24	1337736	0.06
Mammalia	Pipistrellus_pipistrellus	59474	Chordata	Mammalia	Chiroptera	Vespertilionidae	GCA_903992545.1	7.3	2.14017e+09	16.7	Pantheria	5.28	Pantheria	2.81541	1.66393	670	0.0126188	0.0748559	0.168575	NA	NA	NA	NA	0.0653764	0.23292	0.169408	0.0411312	0.566133	0.163809	450473312	21.19	32916168	1.54	95006732	4.47	26258672	1.23	163640	NA	112739964	5.3	67497168	3.17	15832	NA	113344108	5.33	2530632	0.11
Mammalia	Myotis_myotis	51298	Chordata	Mammalia	Chiroptera	Vespertilionidae	GCA_014108235.1	12.4	2122260000	22	Pantheria	25.7	Pantheria	3.09104	3.24649	689	0.0247601	0.14741	0.167968	783	0.0291281	0.182754	0.159385	0.217838	0.158765	0.171431	0.195926	0.309241	0.153023	422467288	20.05	35776756	1.69	102608916	4.87	35146136	1.66	488048	0.02	122442052	5.81	56452660	2.68	139896	NA	61774960	2.93	7637864	0.36
Mammalia	Miniopterus_schreibersii	9433	Chordata	Mammalia	Chiroptera	Vespertilionidae	GCA_004026525.1	5.6	1887540000	14	Pantheria	10.9	Pantheria	2.63906	2.38876	746	0.0420719	0.29347	0.14336	841	0.042043	0.298606	0.140797	0.425692	0.166008	0.192545	0.358511	0.344163	0.131664	350693180	18.66	23457908	1.24	167752	NA	35293332	1.87	70784	NA	140051492	7.45	51697992	2.75	11452	NA	99279084	5.28	662988	0.03
Mammalia	Molossus_molossus	27622	Chordata	Mammalia	Chiroptera	Molossidae	GCA_014108415.1	8.6	2356980000	5.6	AnAge	13.8	Pantheria	1.72277	2.62467	746	0.0467449	0.304902	0.153311	839	0.0464123	0.312826	0.148365	0.468309	0.14699	0.176044	0.393859	0.339463	0.1318	536006264	22.89	15036848	0.64	269476	0.01	24843192	1.06	492704	0.02	258860988	11.05	119547696	5.1	17356	NA	113693512	4.85	3244096	0.13
Mammalia	Anoura_caudifer	27642	Chordata	Mammalia	Chiroptera	Phyllostomidae	GCA_004027475.1	5.2	2.67652e+09	NA	NA	10.7	Pantheria	NA	2.37024	736	0.0282741	0.201075	0.140614	827	0.0287249	0.204882	0.140202	0.185778	0.243705	0.160186	0.151057	0.551254	0.115501	NA	NA	NA	NA	NA	NA	NA	NA	NA	NA	NA	NA	NA	NA	NA	NA	NA	NA	NA	NA
Mammalia	Artibeus_jamaicensis	9417	Chordata	Mammalia	Chiroptera	Phyllostomidae	GCA_014825515.1	5	2591700000	10	Pantheria	41.6	Pantheria	2.30259	3.7281	773	0.0227916	0.163472	0.139422	866	0.0222056	0.16482	0.134726	0.125014	0.328199	0.119463	0.101877	0.670055	0.124838	561825044	21.82	23311508	0.9	102580	NA	32275596	1.25	218312	NA	139450176	5.41	25133400	0.97	9944	NA	333586492	12.95	7737036	0.3
Mammalia	Sturnira_hondurensis	192404	Chordata	Mammalia	Chiroptera	Phyllostomidae	GCA_014824575.2	5.1	2.54343e+09	NA	NA	NA	NA	NA	NA	752	0.0236024	0.161433	0.146206	848	0.0230696	0.163545	0.14106	0.125014	0.390466	0.147866	0.101877	0.653593	0.129555	529399124	20.95	39101236	1.54	101428	NA	62831392	2.48	8008	NA	202713336	8.02	35060172	1.38	24072	NA	187088992	7.4	2470092	0.09
Mammalia	Tonatia_saurophila	171122	Chordata	Mammalia	Chiroptera	Phyllostomidae	GCA_004024845.1	4.7	2.55464e+09	NA	NA	NA	NA	NA	NA	735	0.0334858	0.25518	0.131224	827	0.0330883	0.260044	0.127241	0.19755	0.336753	0.137138	0.163992	0.557899	0.134159	568543108	22.35	55140872	2.16	146956	NA	66540276	2.61	76464	NA	216066612	8.49	40865836	1.6	10508	NA	188486132	7.41	1209452	0.04
Mammalia	Desmodus_rotundus	9430	Chordata	Mammalia	Chiroptera	Phyllostomidae	GCA_002940915.2	6.4	2337420000	19.5	Pantheria	33	Pantheria	2.97041	3.49651	755	0.0296156	0.196136	0.150995	848	0.0294482	0.199251	0.147794	0.219961	0.235905	0.156067	0.189555	0.420591	0.139097	313340880	13.55	32219056	1.39	1424	NA	31630520	1.36	4460	NA	176177912	7.62	21180556	0.91	2648	NA	50377636	2.17	1746276	0.07
Mammalia	Micronycteris_hirsuta	148065	Chordata	Mammalia	Chiroptera	Phyllostomidae	GCA_004026765.1	6.4	2190720000	NA	NA	12.8	Pantheria	NA	2.54945	690	0.0338838	0.246209	0.137622	779	0.0329103	0.251596	0.130806	0.219961	0.321708	0.134772	0.189555	0.466067	0.125494	460287864	21.1	48673036	2.23	105260	NA	57131816	2.61	65040	NA	192212124	8.81	34482788	1.58	10388	NA	125909384	5.77	1698028	0.07
Mammalia	Mormoops_blainvillei	118852	Chordata	Mammalia	Chiroptera	Mormoopidae	GCA_004026545.1	2.7	2.56174e+09	NA	NA	NA	NA	NA	NA	758	0.0373044	0.259028	0.144017	862	0.0374787	0.265388	0.141222	0.345544	0.183099	0.154065	0.294501	0.376469	0.128689	546344892	21.41	61721988	2.41	137436	NA	58359308	2.28	69584	NA	219248376	8.59	38268472	1.49	8552	NA	167595792	6.56	935384	0.03
Mammalia	Noctilio_leporinus	94963	Chordata	Mammalia	Chiroptera	Noctilionidae	GCA_004026585.1	10.1	2317860000	11.5	Pantheria	60.3	Pantheria	2.44235	4.09933	708	0.0622063	0.427251	0.145597	794	0.0610964	0.435721	0.140219	0.403232	0.242246	0.149156	0.341055	0.473743	0.138602	555413416	24.06	48392788	2.09	114244	NA	38751596	1.67	92836	NA	232870284	10.09	44262292	1.91	13392	NA	187988848	8.14	2926740	0.12
Mammalia	Macroglossus_sobrinus	326083	Chordata	Mammalia	Chiroptera	Pteropodidae	GCA_004027375.1	2	2102700000	NA	NA	21.8	Pantheria	NA	3.08191	772	0.0267778	0.183867	0.145637	875	0.0291596	0.199411	0.146228	0.282225	0.126651	0.190601	0.253598	0.322503	0.114362	362915256	17.33	24964908	1.19	124384	NA	41171616	1.96	73100	NA	172741176	8.25	11516920	0.55	6284	NA	109145624	5.21	3171244	0.15
Mammalia	Pteropus_giganteus	143291	Chordata	Mammalia	Chiroptera	Pteropodidae	GCA_902729225.1	3.2	2132040000	31.4	Pantheria	818	Pantheria	3.44681	6.70686	537	0.00390742	0.020046	0.194922	NA	NA	NA	NA	0.0745277	0.0435425	0.178833	0.0578504	0.116033	0.150939	328496344	15.52	17975776	0.84	209120	NA	32925976	1.55	8168	NA	157845052	7.45	6221776	0.29	5808	NA	107640728	5.08	5663940	0.26
Mammalia	Pteropus_pselaphon	1496133	Chordata	Mammalia	Chiroptera	Pteropodidae	GCA_014363405.1	3.4	2.34566e+09	16.7	AnAge	NA	NA	2.81541	NA	542	0.00450582	0.0201818	0.223261	NA	NA	NA	NA	0.0745277	0.0552	0.17972	0.0578504	0.128213	0.136356	447705956	19.21	24955516	1.07	105452	NA	41992316	1.8	317724	0.01	155199840	6.66	12573044	0.53	6408	NA	198187036	8.5	14368224	0.61
Mammalia	Rousettus_aegyptiacus	9407	Chordata	Mammalia	Chiroptera	Pteropodidae	GCA_014176215.1	2.7	2063580000	22.9	AnAge	125	AnAge	3.13114	4.82831	773	0.0240289	0.156516	0.153523	880	0.024898	0.168198	0.148028	0.251297	0.150804	0.19619	0.220311	0.285703	0.147589	184355140	8.99	10155192	0.49	142004	NA	21977872	1.07	59448	NA	102451312	5	4837864	0.23	3588	NA	40828936	1.99	3898924	0.19
Mammalia	Megaderma_lyra	9413	Chordata	Mammalia	Chiroptera	Megadermatidae	GCA_004026885.1	6.3	3.17803e+09	14	Pantheria	38.9	Pantheria	2.63906	3.66099	744	0.0593279	0.426907	0.138971	840	0.057867	0.424859	0.136203	0.580382	0.168905	0.144958	0.51104	0.326508	0.126844	1152651176	36.41	131601400	4.15	410808	0.01	92777212	2.93	254148	NA	386362032	12.2	21527948	0.68	6236	NA	516467052	16.31	3243548	0.1
Mammalia	Ceratotherium_simum_simum	73337	Chordata	Mammalia	Perissodactyla	Rhinocerotidae	GCA_000283155.1	4	2.98852e+09	50	Pantheria	2260000	Pantheria	3.91202	14.6309	662	0.00603545	0.0273011	0.221069	NA	NA	NA	NA	0.181533	0.0341792	0.267183	0.147027	0.0872021	0.158465	674084924	22.8	20113812	0.68	63528	NA	98518904	3.33	94764	NA	204078304	6.9	66066288	2.23	4860	NA	280031228	9.47	5113236	0.17
Mammalia	Diceros_bicornis	9805	Chordata	Mammalia	Perissodactyla	Rhinocerotidae	GCA_004027315.2	3	3266520000	47	Pantheria	977000	Pantheria	3.85015	13.7922	692	0.00671393	0.0300631	0.223328	NA	NA	NA	NA	0.181533	0.0366656	0.216168	0.147027	0.104045	0.163734	1198193616	36.84	50730032	1.56	263140	NA	149660700	4.6	152092	NA	300087096	9.22	63203380	1.94	14968	NA	626450156	19.26	7631656	0.23
Mammalia	Rhinoceros_unicornis	9809	Chordata	Mammalia	Perissodactyla	Rhinocerotidae	GCA_019022865.1	2.7	3.05993e+09	49	Pantheria	1830000	Pantheria	3.89182	14.4198	759	0.0118314	0.0593182	0.199456	892	0.0308939	0.189653	0.162897	0.304801	0.0458849	0.232423	0.257332	0.115781	0.166042	898546232	29.56	38307452	1.26	141508	NA	123165232	4.05	66088	NA	288495980	9.49	76262344	2.5	11984	NA	364416728	11.99	7678916	0.25
Mammalia	Tapirus_indicus	9802	Chordata	Mammalia	Perissodactyla	Tapiridae	GCA_004024905.1	2.2	2689500000	30	Pantheria	308000	Pantheria	3.4012	12.6379	704	0.0124921	0.0644365	0.193867	848	0.0299599	0.192403	0.155715	0.264496	0.0430992	0.245754	0.229236	0.116283	0.14534	617424848	23.05	41040308	1.53	290520	0.01	94921156	3.54	105604	NA	239514600	8.94	47022156	1.75	10976	NA	193203168	7.21	1315964	0.04
Mammalia	Tapirus_terrestris	9801	Chordata	Mammalia	Perissodactyla	Tapiridae	GCA_004025025.1	2.5	3696840000	35	Pantheria	166000	Pantheria	3.55535	12.0197	669	0.0104716	0.0552607	0.189495	NA	NA	NA	NA	0.264496	0.0428163	0.233216	0.229236	0.101089	0.160504	1109471172	30.14	63333504	1.72	586532	0.01	152919560	4.15	205556	NA	336563568	9.14	74933984	2.03	22244	NA	478450212	13	2456012	0.06
Mammalia	Equus_caballus	9796	Chordata	Mammalia	Perissodactyla	Equidae	GCA_002863925.1	3.8	3080700000	62	Pantheria	400000	Pantheria	4.12713	12.8992	758	0.038698	0.268891	0.143917	863	0.0377203	0.270109	0.139648	0.609977	0.120254	0.157636	0.554079	0.205638	0.140459	696242444	22.75	36297336	1.18	173236	NA	108297000	3.53	85700	NA	293283424	9.58	72039456	2.35	3424	NA	184907720	6.04	1153960	0.03
Mammalia	Ailuropoda_melanoleuca	9646	Chordata	Mammalia	Carnivora	Ursidae	GCA_002007445.2	9.2	2.96396e+09	30	Pantheria	118000	Pantheria	3.4012	11.6784	710	0.0142628	0.0738629	0.193098	818	0.0302811	0.202734	0.149364	0.343651	0.0569384	0.186516	0.289685	0.129579	0.165108	471495508	16.06	13206928	0.45	26088	NA	25079116	0.85	42004	NA	241898000	8.24	78163012	2.66	2352	NA	112712988	3.84	365020	0.01
Mammalia	Ursus_arctos_horribilis	116960	Chordata	Mammalia	Carnivora	Ursidae	GCA_003584765.2	4.2	2.82425e+09	50	Pantheria	196000	Pantheria	3.91202	12.1859	523	0.00326854	0.0158816	0.205807	NA	NA	NA	NA	0.129412	0.029425	0.264634	0.0902514	0.0595535	0.171806	412451316	14.7	12953416	0.46	44208	NA	27365116	0.97	424704	0.01	189028184	6.73	65304800	2.32	4512	NA	113094960	4.03	4231416	0.15
Mammalia	Ursus_thibetanus_thibetanus	441215	Chordata	Mammalia	Carnivora	Ursidae	GCA_009660055.1	3.6	2.87866e+09	35.1667	Pantheria	99900	Pantheria	3.5601	11.5119	538	0.00361342	0.0192132	0.188069	NA	NA	NA	NA	0.129412	0.021707	0.215542	0.0902514	0.0724642	0.156134	463010328	16.19	14062780	0.49	27396	NA	27771588	0.97	1542052	0.05	177051704	6.19	71147376	2.48	12052	NA	160606596	5.61	10788784	0.37
Mammalia	Arctocephalus_gazella	37190	Chordata	Mammalia	Carnivora	Otariidae	GCA_900642305.1	6.8	2.80602e+09	23	Pantheria	96600	Pantheria	3.13549	11.4783	632	0.0160196	0.0422787	0.378904	813	0.0359824	0.193606	0.185853	0.115437	0.063278	0.411846	0.0670384	0.148873	0.22817	NA	NA	NA	NA	NA	NA	NA	NA	NA	NA	NA	NA	NA	NA	NA	NA	NA	NA	NA	NA
Mammalia	Eumetopias_jubatus	34886	Chordata	Mammalia	Carnivora	Otariidae	GCA_004028035.1	16.5	2.93272e+09	30	Pantheria	384000	Pantheria	3.4012	12.8584	470	0.00370889	0.0162354	0.228444	NA	NA	NA	NA	0.115437	0.0204567	0.267856	0.0670384	0.0965877	0.216674	501180484	17.2	13535720	0.46	226752	NA	30516324	1.04	212972	NA	279566496	9.59	61512336	2.11	2384	NA	113678548	3.9	1926180	0.06
Mammalia	Callorhinus_ursinus	34884	Chordata	Mammalia	Carnivora	Otariidae	GCA_003265705.1	26.1	3.28203e+09	35	Pantheria	55700	Pantheria	3.55535	10.9277	501	0.00510896	0.0237017	0.215553	NA	NA	NA	NA	0.162562	0.0321828	0.215683	0.099075	0.0995398	0.199305	640683800	19.65	15253748	0.46	266492	NA	36467972	1.11	365064	0.01	309379760	9.48	70843364	2.17	4696	NA	204686420	6.27	3413512	0.1
Mammalia	Odobenus_rosmarus_divergens	9708	Chordata	Mammalia	Carnivora	Odobenidae	GCA_000321225.1	14.3	2.9108e+09	40	Pantheria	1050000	Pantheria	3.68888	13.8643	677	0.00848397	0.0427487	0.198461	NA	NA	NA	NA	0.297933	0.0319691	0.203759	0.213797	0.0933598	0.160047	565181412	19.6	8029796	0.27	20236	NA	24026616	0.83	1195900	0.04	202039824	7	54665096	1.89	7080	NA	272999184	9.47	2196888	0.07
Mammalia	Halichoerus_grypus	9711	Chordata	Mammalia	Carnivora	Phocidae	GCA_012393455.1	8.4	2.83587e+09	46.6725	Pantheria	197000	Pantheria	3.84316	12.191	500	0.00488136	0.0185919	0.262553	NA	NA	NA	NA	0.167578	0.0167544	0.262667	0.117237	0.0537464	0.166331	748331140	26.56	24673672	0.87	160480	NA	56771068	2.01	6836652	0.24	298526764	10.59	50342996	1.78	21060	NA	306337868	10.87	4659392	0.16
Mammalia	Phoca_vitulina	9720	Chordata	Mammalia	Carnivora	Phocidae	GCA_004348235.1	8.3	2.86655e+09	40	Pantheria	87300	Pantheria	3.68888	11.3771	477	0.00318833	0.0159126	0.200364	NA	NA	NA	NA	0.167578	0.0101616	0.187533	0.117237	0.0450075	0.152912	NA	NA	NA	NA	NA	NA	NA	NA	NA	NA	NA	NA	NA	NA	NA	NA	NA	NA	NA	NA
Mammalia	Mirounga_angustirostris	9716	Chordata	Mammalia	Carnivora	Phocidae	GCA_004023865.1	9.6	2.91947e+09	20.2917	Pantheria	1120000	Pantheria	3.01021	13.9288	411	0.0077002	0.0230477	0.334099	NA	NA	NA	NA	0.120913	0.0292641	0.283203	0.0539643	0.0761468	0.174521	661613540	22.75	37593536	1.29	224256	NA	65685616	2.25	147344	NA	258098748	8.87	55569916	1.91	3100	NA	242514132	8.34	1776496	0.06
Mammalia	Mirounga_leonina	9715	Chordata	Mammalia	Carnivora	Phocidae	GCA_011800145.1	10.9	2.93158e+09	23	Pantheria	1600000	Pantheria	3.13549	14.2855	424	0.00440043	0.0195192	0.225441	NA	NA	NA	NA	0.120913	0.0173494	0.255601	0.0539643	0.0619708	0.181582	452768668	15.54	14615080	0.5	51032	NA	33116944	1.13	1959900	0.06	218953312	7.51	64942904	2.22	4920	NA	116631548	4	2491840	0.08
Mammalia	Ailurus_fulgens_styani	424585	Chordata	Mammalia	Carnivora	Ailuridae	GCA_002007465.1	7.1	2.84155e+09	14	Pantheria	5170	Pantheria	2.63906	8.55063	743	0.027634	0.183043	0.15097	838	0.0267812	0.181696	0.147395	0.471488	0.0861108	0.164226	0.388673	0.220332	0.139044	465197260	16.55	7064288	0.25	48112	NA	18728072	0.66	59700	NA	184272352	6.55	67613860	2.4	592	NA	186747708	6.64	662576	0.02
Mammalia	Enhydra_lutris_kenyoni	391180	Chordata	Mammalia	Carnivora	Mustelidae	GCA_002288905.2	4.7	2.97752e+09	30	Pantheria	27500	Pantheria	3.4012	10.2219	707	0.00778104	0.0400675	0.194198	NA	NA	NA	NA	0.109419	0.0756676	0.234955	0.0715254	0.283058	0.138845	477728156	16.15	8141864	0.27	128332	NA	27984152	0.94	194568	NA	206699272	6.99	103803652	3.51	2336	NA	128516400	4.34	2257580	0.07
Mammalia	Lutra_lutra	9657	Chordata	Mammalia	Carnivora	Mustelidae	GCA_902655055.2	8.9	2.95716e+09	22	Pantheria	8860	Pantheria	3.09104	9.0893	698	0.00845754	0.0446338	0.189487	NA	NA	NA	NA	0.109419	0.078717	0.188958	0.0715254	0.295568	0.141124	563608416	19.19	9790408	0.33	101276	NA	28733720	0.97	176316	NA	234305940	7.97	100349908	3.41	7096	NA	187850004	6.39	2293748	0.07
Mammalia	Lontra_canadensis	76717	Chordata	Mammalia	Carnivora	Mustelidae	GCA_010015895.1	6.8	2.91757e+09	25	Pantheria	8090	Pantheria	3.21888	8.99838	731	0.00987637	0.056002	0.176357	NA	NA	NA	NA	0.133575	0.0917421	0.216219	0.0959621	0.269145	0.148504	457227984	15.78	8279512	0.28	247100	NA	27013372	0.93	168180	NA	205902580	7.1	102001544	3.52	4064	NA	112001756	3.86	1609876	0.05
Mammalia	Pteronura_brasiliensis	9672	Chordata	Mammalia	Carnivora	Mustelidae	GCA_004024605.1	5.1	3.15543e+09	12.8333	Pantheria	26000	Pantheria	2.55205	10.1659	704	0.0132641	0.0696226	0.190515	NA	NA	NA	NA	0.152796	0.0934864	0.216568	0.119524	0.265126	0.134384	793946588	25.27	32870232	1.04	320356	0.01	70410428	2.24	280884	NA	244596052	7.78	75823484	2.41	6516	NA	365991728	11.65	3646512	0.11
Mammalia	Mustela_nivalis	36239	Chordata	Mammalia	Carnivora	Mustelidae	GCA_019141155.1	8.2	3.03307e+09	10	Pantheria	79.9	Pantheria	2.30259	4.38078	737	0.0152763	0.105968	0.144159	NA	NA	NA	NA	0.19337	0.119699	0.148214	0.160786	0.327431	0.116819	NA	NA	NA	NA	NA	NA	NA	NA	NA	NA	NA	NA	NA	NA	NA	NA	NA	NA	NA	NA
Mammalia	Martes_zibellina	36722	Chordata	Mammalia	Carnivora	Mustelidae	GCA_012583365.1	4.9	2.93564e+09	15	Pantheria	1170	Pantheria	2.70805	7.06476	746	0.0128412	0.08397	0.152926	848	0.0149683	0.106064	0.141125	0.23056	0.075296	0.180592	0.197574	0.203971	0.123439	500967032	17.21	10390404	0.35	68344	NA	43027400	1.47	165088	NA	187458772	6.44	103606636	3.55	9512	NA	155256984	5.33	983496	0.03
Mammalia	Mellivora_capensis	9664	Chordata	Mammalia	Carnivora	Mustelidae	GCA_004024625.1	6.3	3.74716e+09	26.5	Pantheria	9000	Pantheria	3.27714	9.10498	676	0.0166117	0.0982944	0.168999	763	0.0176462	0.109533	0.161103	0.25284	0.0877224	0.194645	0.216962	0.216635	0.166397	1160278736	31.1	43514068	1.16	288664	NA	95732292	2.56	180992	NA	351882240	9.43	102891468	2.75	22700	NA	562580176	15.08	3184948	0.08
Mammalia	Spilogale_gracilis	30551	Chordata	Mammalia	Carnivora	Mephitidae	GCA_004023965.1	4.9	2.98725e+09	NA	NA	420	AnimalTraits	NA	6.04025	688	0.0386361	0.261956	0.147491	781	0.0371791	0.261856	0.141983	0.510223	0.110625	0.177667	0.425508	0.277887	0.149151	684302820	23.01	25844992	0.86	324768	0.01	52617668	1.76	100856	NA	267813444	9	100648772	3.38	8164	NA	234685856	7.89	2258300	0.07
Mammalia	Canis_lupus_dingo	286419	Chordata	Mammalia	Carnivora	Canidae	GCA_012295265.1	11	2.90845e+09	29.5	Pantheria	35000	Pantheria	3.38439	10.4631	186	0.00284281	0.0106959	0.265785	NA	NA	NA	NA	0.0599857	0.0199646	0.353173	0.0313461	0.0520717	0.160447	392317432	13.58	10790056	0.37	14336	NA	25644012	0.88	158320	NA	186686140	6.46	77354468	2.67	28708	NA	88810820	3.07	2830572	0.09
Mammalia	Canis_lupus_familiaris	9615	Chordata	Mammalia	Carnivora	Canidae	GCA_014441545.1	11.1	2.90681e+09	NA	NA	NA	NA	NA	NA	181	0.0027479	0.0104885	0.261991	NA	NA	NA	NA	0.0599857	0.00863716	0.337882	0.0313461	0.0591358	0.158421	NA	NA	NA	NA	NA	NA	NA	NA	NA	NA	NA	NA	NA	NA	NA	NA	NA	NA	NA	NA
Mammalia	Lycaon_pictus	9622	Chordata	Mammalia	Carnivora	Canidae	GCA_004216515.1	9.4	2669940000	11	Pantheria	22000	Pantheria	2.3979	9.9988	519	0.00525964	0.0223341	0.235498	769	0.0421357	0.312328	0.134908	0.152929	0.0237454	0.297353	0.101524	0.0845044	0.145464	307507576	11.59	7228716	0.27	171684	NA	16915944	0.63	352160	0.01	145576012	5.48	62774064	2.36	1536	NA	70615000	2.66	3872064	0.14
Mammalia	Otocyon_megalotis_megalotis	2793302	Chordata	Mammalia	Carnivora	Canidae	GCA_017311455.1	10.2	2.87994e+09	13.8	Pantheria	4000	Pantheria	2.62467	8.29405	670	0.00975448	0.0513372	0.190008	NA	NA	NA	NA	0.286544	0.0414126	0.185117	0.197302	0.102027	0.143282	491286960	17.18	15972596	0.55	302176	0.01	33877272	1.18	48292	NA	208663008	7.29	77888372	2.72	7512	NA	142156880	4.97	12370852	0.43
Mammalia	Vulpes_vulpes	9627	Chordata	Mammalia	Carnivora	Canidae	GCA_003160815.1	12.3	2787300000	15	Pantheria	4840	Pantheria	2.70805	8.48467	659	0.00869609	0.0492062	0.176728	NA	NA	NA	NA	0.301895	0.0318082	0.185555	0.222923	0.0891293	0.115606	413219772	14.94	16509896	0.59	56244	NA	31443268	1.13	56184	NA	192607144	6.96	66393696	2.4	109728	NA	104234264	3.76	1809348	0.06
Mammalia	Nyctereutes_procyonoides	34880	Chordata	Mammalia	Carnivora	Canidae	GCA_905146905.1	11.3	2.89498e+09	14	Pantheria	4220	Pantheria	2.63906	8.34759	675	0.00765906	0.040335	0.189886	NA	NA	NA	NA	0.343694	0.025686	0.169213	0.24997	0.0813871	0.171274	NA	NA	NA	NA	NA	NA	NA	NA	NA	NA	NA	NA	NA	NA	NA	NA	NA	NA	NA	NA
Mammalia	Crocuta_crocuta	9678	Chordata	Mammalia	Carnivora	Hyaenidae	GCA_008692635.1	4.6	2.84813e+09	41.1	Pantheria	64000	Pantheria	3.71601	11.0666	661	0.00572748	0.0277126	0.206674	NA	NA	NA	NA	0.0668909	0.0851862	0.214362	0.0581646	0.193784	0.193486	484942724	17.16	18118904	0.64	53272	NA	43078804	1.52	159720	NA	176171612	6.23	94545280	3.34	4660	NA	114690424	4.05	38120048	1.34
Mammalia	Hyaena_hyaena	95912	Chordata	Mammalia	Carnivora	Hyaenidae	GCA_003009895.1	4.9	2.88003e+09	24	Pantheria	35100	Pantheria	3.17805	10.466	678	0.0054239	0.0288428	0.18805	NA	NA	NA	NA	0.0668909	0.0819267	0.196561	0.0581646	0.199226	0.184106	479193928	16.75	19928144	0.69	44208	NA	43976792	1.53	69776	NA	196837572	6.88	107090776	3.74	5664	NA	110138216	3.85	1102780	0.03
Mammalia	Proteles_cristata_cristata	2793304	Chordata	Mammalia	Carnivora	Hyaenidae	GCA_017311185.1	4.9	2.89726e+09	20	AnAge	10000	AnAge	2.99573	9.21034	716	0.00785134	0.042184	0.186121	NA	NA	NA	NA	0.0894075	0.111814	0.195423	0.0852672	0.225755	0.172517	571673328	19.86	18889272	0.65	205616	NA	64499904	2.24	67676	NA	184182452	6.39	109215184	3.79	6600	NA	192460972	6.68	2145652	0.07
Mammalia	Cryptoprocta_ferox	94188	Chordata	Mammalia	Carnivora	Eupleridae	GCA_004023885.1	6.8	2.98184e+09	20	Pantheria	9500	Pantheria	2.99573	9.15905	701	0.0193147	0.118662	0.162771	796	0.0198019	0.125029	0.158379	0.337848	0.0808013	0.203087	0.279583	0.188432	0.136869	663861836	22.36	36368128	1.22	254604	NA	67338432	2.26	166816	NA	224611832	7.56	79462696	2.67	13020	NA	254040176	8.55	1604548	0.05
Mammalia	Helogale_parvula	210647	Chordata	Mammalia	Carnivora	Herpestidae	GCA_004023845.1	6.2	2.9015e+09	10.9167	Pantheria	285	Pantheria	2.39029	5.65249	696	0.0131867	0.0790676	0.166778	NA	NA	NA	NA	0.0984499	0.168574	0.175353	0.0909229	0.314663	0.180157	638712012	22.1	31543888	1.09	209412	NA	70744956	2.44	159416	NA	222127804	7.68	102461532	3.54	9320	NA	209615392	7.25	1839500	0.06
Mammalia	Mungos_mungo	210652	Chordata	Mammalia	Carnivora	Herpestidae	GCA_004023785.1	6.7	2.96897e+09	12	Pantheria	1260	Pantheria	2.48491	7.13887	711	0.0135481	0.0820992	0.165021	827	0.0295614	0.232118	0.127355	0.0984499	0.18568	0.165696	0.0909229	0.287797	0.187981	671987700	22.73	32764092	1.1	240416	NA	80186372	2.71	150232	NA	234341824	7.92	101532684	3.43	13528	NA	220851356	7.47	1907196	0.06
Mammalia	Felis_catus	9685	Chordata	Mammalia	Carnivora	Felidae	GCA_000181335.5	4.3	2845980000	30	AnAge	3900	AnAge	3.4012	8.26873	592	0.00393043	0.020584	0.190946	NA	NA	NA	NA	0.104167	0.0402473	0.165024	0.0900076	0.0949448	0.173345	NA	NA	NA	NA	NA	NA	NA	NA	NA	NA	NA	NA	NA	NA	NA	NA	NA	NA	NA	NA
Mammalia	Felis_chaus	61376	Chordata	Mammalia	Carnivora	Felidae	GCA_019924945.1	3.8	2.94487e+09	12	Pantheria	7170	Pantheria	2.48491	8.87766	600	0.00366599	0.0201313	0.182104	NA	NA	NA	NA	0.104167	0.0403974	0.192413	0.0900076	0.113298	0.168284	466658956	15.95	23876144	0.81	357412	0.01	45461544	1.55	86708	NA	199452292	6.82	88281820	3.01	10088	NA	106968444	3.65	2164108	0.07
Mammalia	Puma_yagouaroundi	1608482	Chordata	Mammalia	Carnivora	Felidae	GCA_014898765.1	4	2.99914e+09	18.6	AnAge	7000	AnAge	2.92316	8.85367	700	0.00667081	0.0359741	0.185434	NA	NA	NA	NA	0.179161	0.0467798	0.204015	0.133268	0.134865	0.201142	375139760	12.59	17083572	0.57	68684	NA	33173564	1.11	228072	NA	159252284	5.34	89986176	3.02	8816	NA	72109340	2.42	3228856	0.1
Mammalia	Prionailurus_bengalensis	37029	Chordata	Mammalia	Carnivora	Felidae	GCA_016509475.2	4.1	2.95385e+09	15	Pantheria	2790	Pantheria	2.70805	7.9338	673	0.00563089	0.0305392	0.184382	NA	NA	NA	NA	0.195567	0.0336966	0.19757	0.136203	0.101795	0.159416	549068792	18.71	25370696	0.86	125316	NA	56127364	1.91	101780	NA	196368076	6.69	101235492	3.45	2292	NA	166066384	5.66	3671392	0.12
Mammalia	Lynx_pardinus	191816	Chordata	Mammalia	Carnivora	Felidae	GCA_900661375.1	3.4	2.9266e+09	NA	NA	11100	Pantheria	NA	9.3147	646	0.00555777	0.0296886	0.187202	848	0.0257749	0.174392	0.147799	0.220855	0.0281901	0.192914	0.146615	0.0817878	0.163859	397124788	13.7	20249240	0.69	18448	NA	28805792	0.99	69532	NA	223023176	7.69	55410244	1.91	10252	NA	68157000	2.35	1380312	0.04
Mammalia	Panthera_leo	9689	Chordata	Mammalia	Carnivora	Felidae	GCA_018350215.1	3.5	2885100000	30	Pantheria	159000	Pantheria	3.4012	11.9767	514	0.00379155	0.0164768	0.230114	NA	NA	NA	NA	0.0931125	0.0235417	0.24934	0.112059	0.0515589	0.216094	409260440	14.29	19859928	0.69	132164	NA	41372724	1.44	76916	NA	181815500	6.35	87450188	3.05	8256	NA	77255784	2.69	1288980	0.04
Mammalia	Panthera_tigris	9694	Chordata	Mammalia	Carnivora	Felidae	GCA_018350195.2	4.6	2650380000	26.3	Pantheria	163000	Pantheria	3.26957	12.0015	566	0.00424723	0.0189742	0.223843	NA	NA	NA	NA	0.0931125	0.0377662	0.256017	0.112059	0.0697961	0.218129	359097772	13.66	17183384	0.65	39068	NA	34885488	1.32	47352	NA	162964288	6.2	83085060	3.16	488	NA	59901424	2.27	991220	0.03
Mammalia	Panthera_onca	9690	Chordata	Mammalia	Carnivora	Felidae	GCA_004023805.1	3.7	3.03713e+09	23	Pantheria	84900	Pantheria	3.13549	11.3492	441	0.00625533	0.0222574	0.281044	NA	NA	NA	NA	0.171958	0.0177245	0.245704	0.11904	0.0605512	0.202044	664990908	21.99	38404556	1.27	305488	0.01	71395360	2.36	185812	NA	232485860	7.68	77212088	2.55	15972	NA	243295320	8.04	1689660	0.05
Mammalia	Paradoxurus_hermaphroditus	71117	Chordata	Mammalia	Carnivora	Viverridae	GCA_004024585.1	4	3.00409e+09	22.4167	Pantheria	3200	Pantheria	3.1098	8.07091	684	0.0330823	0.260589	0.126952	771	0.032388	0.267732	0.120972	0.532334	0.118869	0.163443	0.460063	0.208049	0.138079	624843440	20.88	34188108	1.14	169300	NA	64582180	2.15	177184	NA	223906164	7.48	84093004	2.81	14476	NA	215877596	7.21	1835032	0.06
Mammalia	Manis_pentadactyla	143292	Chordata	Mammalia	Pholidota	Manidae	GCA_014570555.1	4.6	2.9102e+09	NA	NA	4670	Pantheria	NA	8.44891	766	0.0750475	0.471507	0.159165	873	0.0730945	0.474522	0.154038	0.726546	0.164896	0.16696	0.661347	0.315766	0.141978	686768232	23.8	16423468	0.56	39152	NA	116242064	4.02	629944	0.02	374125280	12.96	4776680	0.16	3476	NA	170185348	5.89	4342820	0.15
Mammalia	Aepyceros_melampus	9897	Chordata	Mammalia	Artiodactyla	Bovidae	GCA_006408695.1	7.4	4586820000	17.75	Pantheria	52300	Pantheria	2.87639	10.8648	687	0.0225331	0.120437	0.187095	766	0.0231619	0.129055	0.179474	0.260545	0.11788	0.225759	0.183491	0.274767	0.156667	1797980884	39.47	45812224	1	572884	0.01	147742768	3.24	147632	NA	427521032	9.38	222958724	4.89	1351388	0.02	944070576	20.72	7803260	0.17
Mammalia	Neotragus_moschatus	66442	Chordata	Mammalia	Artiodactyla	Bovidae	GCA_006410615.1	5.8	3.24434e+09	14	Pantheria	5600	Pantheria	2.63906	8.63052	648	0.0199013	0.119591	0.166412	726	0.0200921	0.121245	0.165714	0.260545	0.103801	0.172296	0.183491	0.301604	0.144773	1490428152	46.25	16896016	0.52	848572	0.02	68142836	2.11	192620	NA	186964900	5.8	116259972	3.6	651396	0.02	1095282608	33.99	5188836	0.16
Mammalia	Ammotragus_lervia	9899	Chordata	Mammalia	Artiodactyla	Bovidae	GCA_002201775.1	8.4	3.21421e+09	21	Pantheria	93200	Pantheria	3.04452	11.4425	745	0.0131293	0.0781784	0.16794	801	0.0121229	0.0691945	0.1752	0.213162	0.103691	0.227511	0.156638	0.215678	0.144706	NA	NA	NA	NA	NA	NA	NA	NA	NA	NA	NA	NA	NA	NA	NA	NA	NA	NA	NA	NA
Mammalia	Beatragus_hunteri	59527	Chordata	Mammalia	Artiodactyla	Bovidae	GCA_004027495.1	6.5	3.27039e+09	NA	NA	159000	AnAge	NA	11.9767	672	0.0153342	0.0835908	0.183444	757	0.0149272	0.0871601	0.171262	0.204857	0.118344	0.257686	0.148644	0.234314	0.148288	968229148	29.73	45101348	1.38	556888	0.01	106765208	3.27	227952	NA	288531100	8.86	131751888	4.04	357040	0.01	392574372	12.05	2363352	0.07
Mammalia	Cephalophus_harveyi	129224	Chordata	Mammalia	Artiodactyla	Bovidae	GCA_006410635.1	7.8	3.41489e+09	NA	NA	14500	Pantheria	NA	9.5819	709	0.0189147	0.111942	0.168969	787	0.0190304	0.112213	0.169592	0.204857	0.128046	0.189701	0.148644	0.364348	0.143821	1143215132	33.71	33157592	0.97	98220	NA	129796796	3.82	181336	NA	333555396	9.83	177296432	5.22	976848	0.02	465212632	13.72	2939880	0.08
Mammalia	Connochaetes_taurinus	9927	Chordata	Mammalia	Artiodactyla	Bovidae	GCA_006408615.1	6.3	3.20599e+09	21.5	Pantheria	196000	Pantheria	3.06805	12.1859	728	0.0118081	0.0669825	0.176287	NA	NA	NA	NA	0.190627	0.0915704	0.193431	0.135064	0.216205	0.143352	752913900	23.64	25735112	0.8	83960	NA	106537856	3.34	119244	NA	256596912	8.06	168510404	5.29	676304	0.02	193394316	6.07	1259792	0.03
Mammalia	Oryx_dammah	59534	Chordata	Mammalia	Artiodactyla	Bovidae	GCA_014754425.2	10.9	3.28241e+09	20.42	Pantheria	197000	Pantheria	3.01651	12.191	706	0.0125877	0.0709962	0.177301	NA	NA	NA	NA	0.190627	0.0705382	0.23478	0.135064	0.242785	0.145677	561373472	17.22	11855100	0.36	167364	NA	55646132	1.7	583412	0.01	250385856	7.68	130109036	3.99	651252	0.01	108167860	3.31	3807064	0.11
Mammalia	Capra_hircus	9925	Chordata	Mammalia	Artiodactyla	Bovidae	GCA_001704415.1	9.3	3168720000	20.8	Pantheria	46900	Pantheria	3.03495	10.7558	538	0.00414223	0.0192776	0.214872	NA	NA	NA	NA	0.10428	0.0326637	0.210027	0.064706	0.108025	0.169325	NA	NA	NA	NA	NA	NA	NA	NA	NA	NA	NA	NA	NA	NA	NA	NA	NA	NA	NA	NA
Mammalia	Capra_sibirica	72544	Chordata	Mammalia	Artiodactyla	Bovidae	GCA_003182615.2	8.9	3.31369e+09	22.25	Pantheria	130000	Pantheria	3.10234	11.7753	569	0.00367519	0.0183965	0.199776	NA	NA	NA	NA	0.10428	0.0332666	0.253336	0.064706	0.12039	0.171131	734498276	22.32	23762352	0.72	366436	0.01	102395204	3.11	156848	NA	276486172	8.4	168930176	5.13	812924	0.02	160260396	4.87	1327372	0.04
Mammalia	Hemitragus_hylocrius	330464	Chordata	Mammalia	Artiodactyla	Bovidae	GCA_004026825.1	9.1	3.29192e+09	17.25	Pantheria	73700	Pantheria	2.84781	11.2078	536	0.00622263	0.0272935	0.227989	605	0.00582324	0.0289653	0.201042	0.116953	0.0889042	0.384629	0.0675317	0.128481	0.172049	922285896	28.14	42259312	1.28	157256	NA	107196400	3.27	179912	NA	300796520	9.17	132095548	4.03	329620	0.01	334507948	10.2	4763380	0.14
Mammalia	Ovis_aries	9940	Chordata	Mammalia	Artiodactyla	Bovidae	GCA_016772045.1	10	3227400000	19.17	Pantheria	34200	Pantheria	2.95335	10.44	534	0.00367894	0.0196976	0.186771	NA	NA	NA	NA	0.0961642	0.0340972	0.262682	0.0518563	0.134714	0.184128	NA	NA	NA	NA	NA	NA	NA	NA	NA	NA	NA	NA	NA	NA	NA	NA	NA	NA	NA	NA
Mammalia	Ovis_canadensis	37174	Chordata	Mammalia	Artiodactyla	Bovidae	GCA_004026945.1	8.8	3.47179e+09	24	Pantheria	74600	Pantheria	3.17805	11.2199	303	0.00711221	0.0215042	0.330736	630	0.0067305	0.0303923	0.221454	0.0522404	0.151797	0.440032	0.0314182	0.143031	0.190451	1084781756	31.38	49466576	1.43	525632	0.01	116979116	3.38	258616	NA	324722444	9.39	150621756	4.35	372060	0.01	439216528	12.7	2619028	0.07
Mammalia	Ovis_nivicola_lydekkeri	1867112	Chordata	Mammalia	Artiodactyla	Bovidae	GCA_903231385.1	7.5	3.17565e+09	NA	NA	90000	Pantheria	NA	11.4076	411	0.00445284	0.0155026	0.287233	NA	NA	NA	NA	0.0522404	0.0380518	0.362508	0.0314182	0.138537	0.213884	625189104	19.9	7744312	0.24	7864	NA	49306852	1.56	18656	NA	314526540	10.01	144420768	4.59	1082348	0.03	107448648	3.42	633116	0.02
Mammalia	Kobus_leche_leche	91880	Chordata	Mammalia	Artiodactyla	Bovidae	GCA_014926565.1	7.7	3.35995e+09	18.58	Pantheria	87400	Pantheria	2.92209	11.3783	741	0.0161408	0.10202	0.158212	820	0.0155238	0.100102	0.15508	0.256156	0.101715	0.169427	0.190765	0.268154	0.176082	1111672516	33.31	20690420	0.62	75796	NA	77165360	2.31	735608	0.02	371845496	11.14	192431824	5.76	1125388	0.03	444077232	13.31	3525392	0.1
Mammalia	Eudorcas_thomsonii	69308	Chordata	Mammalia	Artiodactyla	Bovidae	GCA_006408755.1	9.7	3.52095e+09	20	AnAge	25000	AnAge	2.99573	10.1266	719	0.0122847	0.0673701	0.182347	NA	NA	NA	NA	0.143305	0.110143	0.183105	0.112983	0.271615	0.138444	1552189096	44.39	31755356	0.9	581516	0.01	144892948	4.14	572576	0.01	247475052	7.07	182510968	5.22	1086532	0.03	937496160	26.81	5817592	0.16
Mammalia	Litocranius_walleri	69311	Chordata	Mammalia	Artiodactyla	Bovidae	GCA_006410535.1	10.9	3579480000	13	Pantheria	38500	Pantheria	2.56495	10.5584	699	0.011827	0.0613834	0.192674	NA	NA	NA	NA	0.143305	0.0829755	0.208436	0.112983	0.252633	0.139268	1190979820	33.5	17910112	0.5	81408	NA	105836112	2.97	1985232	0.05	254009688	7.14	141492600	3.98	910328	0.02	665795552	18.73	2957996	0.08
Mammalia	Bos_gaurus	9904	Chordata	Mammalia	Artiodactyla	Bovidae	GCA_014182915.2	8.7	3.29471e+09	NA	NA	NA	NA	NA	NA	569	0.00473357	0.0228236	0.207398	NA	NA	NA	NA	0.0835714	0.0540238	0.220853	0.0668875	0.129673	0.136627	709261048	21.69	19295052	0.59	39752	NA	83883760	2.56	78596	NA	322942632	9.87	143104192	4.37	330840	0.01	136566044	4.17	3020180	0.09
Mammalia	Bos_taurus	9913	Chordata	Mammalia	Artiodactyla	Bovidae	GCA_002263795.2	8.2	3618600000	20	Pantheria	613000	Pantheria	2.99573	13.3261	602	0.00416229	0.0224934	0.185045	NA	NA	NA	NA	0.0835714	0.043089	0.222873	0.0668875	0.162111	0.14246	1088553088	30.31	29812028	0.83	1135732	0.03	96825580	2.69	37368	NA	402584744	11.2	272013380	7.57	1323352	0.03	281390344	7.83	3430560	0.09
Mammalia	Bubalus_bubalis	89462	Chordata	Mammalia	Artiodactyla	Bovidae	GCA_003121395.1	7.8	3.22019e+09	28.25	Pantheria	919000	Pantheria	3.34109	13.731	730	0.0107334	0.0628655	0.170736	NA	NA	NA	NA	0.239109	0.0649368	0.202605	0.173342	0.173453	0.134665	955102940	29.86	31290860	0.97	400940	0.01	97323400	3.04	76524	NA	358013352	11.19	151897108	4.74	292084	NA	312510888	9.77	3296596	0.1
Mammalia	Axis_porcinus	57737	Chordata	Mammalia	Artiodactyla	Cervidae	GCA_003798545.1	11.4	3.24486e+09	20	Pantheria	37100	Pantheria	2.99573	10.5214	679	0.00817889	0.0461634	0.177173	NA	NA	NA	NA	0.17559	0.0677954	0.211949	0.140543	0.161537	0.115343	1018732304	31.61	17797852	0.55	425384	0.01	71106316	2.2	95488	NA	253655040	7.87	118330704	3.67	186820	NA	552663044	17.15	4470864	0.13
Mammalia	Cervus_canadensis	1574408	Chordata	Mammalia	Artiodactyla	Cervidae	GCA_019320065.1	14.5	3.06386e+09	NA	NA	200000	AnimalTraits	NA	12.2061	319	0.003085	0.0133186	0.231632	NA	NA	NA	NA	0.0452228	0.0351872	0.267154	0.0305319	0.102814	0.138162	1078349844	35.44	15429956	0.5	45072	NA	57993068	1.9	61352	NA	218113088	7.16	103270984	3.39	297320	NA	680907496	22.38	2231508	0.07
Mammalia	Cervus_hanglu_yarkandensis	84702	Chordata	Mammalia	Artiodactyla	Cervidae	GCA_010411085.1	15.6	3.14556e+09	NA	NA	NA	NA	NA	NA	327	0.00314614	0.0127686	0.246397	NA	NA	NA	NA	0.0452228	0.0307151	0.297978	0.0305319	0.0880333	0.140075	852038140	27.27	10149260	0.32	15168	NA	42382768	1.35	232408	NA	224345572	7.18	91552352	2.93	314728	0.01	480095116	15.36	2950372	0.09
Mammalia	Cervus_elaphus	9860	Chordata	Mammalia	Artiodactyla	Cervidae	GCA_910594005.1	13.9	3.49956e+09	26.8	Pantheria	240000	Pantheria	3.2884	12.3884	377	0.00327183	0.013433	0.243566	NA	NA	NA	NA	0.0705645	0.0272257	0.274344	0.0470841	0.058367	0.131604	1007269624	28.98	11601448	0.33	22536	NA	52351468	1.5	226740	NA	219089920	6.3	112030872	3.22	149904	NA	607313000	17.47	4483736	0.12
Mammalia	Muntiacus_muntjak	9888	Chordata	Mammalia	Artiodactyla	Cervidae	GCA_008782695.1	10.6	3364320000	17.6	Pantheria	17400	Pantheria	2.8679	9.76423	634	0.00571343	0.028493	0.20052	NA	NA	NA	NA	0.0926258	0.0584482	0.191429	0.0863565	0.138379	0.142566	659567944	19.74	14859976	0.44	42772	NA	56769712	1.69	286100	NA	268357040	8.03	122676640	3.67	456308	0.01	192857252	5.77	3262144	0.09
Mammalia	Muntiacus_reevesi	9886	Chordata	Mammalia	Artiodactyla	Cervidae	GCA_008787405.2	9.6	2787300000	23.2	AnAge	13500	Pantheria	3.14415	9.51044	631	0.00541243	0.0293478	0.184424	NA	NA	NA	NA	0.0926258	0.0586131	0.17352	0.0863565	0.137482	0.144992	671750624	24.27	10172576	0.36	112552	NA	79412908	2.86	397236	0.01	203701576	7.35	98499168	3.55	686320	0.02	269867072	9.75	8901216	0.32
Mammalia	Capreolus_pygargus	48560	Chordata	Mammalia	Artiodactyla	Cervidae	GCA_012922965.1	11.9	3.16216e+09	NA	NA	41000	Pantheria	NA	10.6213	691	0.00897918	0.0513923	0.174718	NA	NA	NA	NA	0.137328	0.085729	0.20728	0.112919	0.17525	0.143416	714463516	22.74	10385120	0.33	103780	NA	46807380	1.49	617960	0.01	246212900	7.83	112659476	3.58	236688	NA	277506756	8.83	19933456	0.63
Mammalia	Hydropotes_inermis	9883	Chordata	Mammalia	Artiodactyla	Cervidae	GCA_006459105.1	11.3	3.06817e+09	12	Pantheria	12700	Pantheria	2.48491	9.44936	702	0.0104131	0.0577853	0.180203	NA	NA	NA	NA	0.137328	0.0890293	0.166559	0.112919	0.242624	0.139864	1066593924	35	7787492	0.25	24724	NA	37808984	1.24	231240	NA	198490600	6.51	83421740	2.73	414088	0.01	729492044	23.94	8923012	0.29
Mammalia	Odocoileus_hemionus_hemionus	9877	Chordata	Mammalia	Artiodactyla	Cervidae	GCA_004115125.1	8.9	2.84247e+09	22	Pantheria	83800	Pantheria	3.09104	11.3362	570	0.00420095	0.0235146	0.178653	NA	NA	NA	NA	0.0728081	0.0639798	0.18748	0.0569987	0.166241	0.140817	1041711816	36.9	9366724	0.33	363528	0.01	71696112	2.54	126996	NA	206652152	7.32	105286820	3.73	162760	NA	640871000	22.7	7185724	0.25
Mammalia	Odocoileus_virginianus_texanus	9880	Chordata	Mammalia	Artiodactyla	Cervidae	GCA_002102435.1	9	2.88702e+09	23	Pantheria	75000	Pantheria	3.13549	11.2252	603	0.00423724	0.0252935	0.167523	NA	NA	NA	NA	0.0728081	0.0593754	0.189164	0.0569987	0.203749	0.140365	1015828244	35.57	5225612	0.18	139832	NA	48524896	1.69	392584	0.01	253019428	8.86	107986480	3.78	102336	NA	595641072	20.85	4796004	0.16
Mammalia	Giraffa_camelopardalis_rothschildi	2740528	Chordata	Mammalia	Artiodactyla	Giraffidae	GCA_017591445.1	10.1	2.96082e+09	36.3	Pantheria	955000	Pantheria	3.59182	13.7695	733	0.0209535	0.129179	0.162205	819	0.021278	0.130203	0.163422	0.373312	0.0836042	0.209963	0.296186	0.217079	0.11714	635486768	21.6	19556836	0.66	58044	NA	62105296	2.11	63540	NA	233573240	7.94	121314424	4.12	135628	NA	196502532	6.68	2176832	0.07
Mammalia	Antilocapra_americana	9891	Chordata	Mammalia	Artiodactyla	Antilocapridae	GCA_007570785.1	17.6	3.04262e+09	12	Pantheria	46900	Pantheria	2.48491	10.7558	674	0.026349	0.178778	0.147384	746	0.0257887	0.178285	0.144648	0.38777	0.112574	0.15688	0.313894	0.266599	0.126366	726081096	24.03	10284780	0.34	576932	0.01	46076220	1.52	1070672	0.03	241366032	7.98	110322836	3.65	290596	NA	310427612	10.27	5665416	0.18
Mammalia	Tragulus_javanicus	9849	Chordata	Mammalia	Artiodactyla	Tragulidae	GCA_004024965.2	12.7	3.14052e+09	12	Pantheria	1870	Pantheria	2.48491	7.53369	700	0.0600496	0.424227	0.141551	781	0.057302	0.423198	0.135402	0.526867	0.206707	0.154807	0.455724	0.322808	0.143735	NA	NA	NA	NA	NA	NA	NA	NA	NA	NA	NA	NA	NA	NA	NA	NA	NA	NA	NA	NA
Mammalia	Balaenoptera_musculus	9771	Chordata	Mammalia	Artiodactyla	Balaenopteridae	GCA_009873245.3	11	2.8802e+09	110	Pantheria	154000000	Pantheria	4.70048	18.8525	721	0.0162621	0.0696673	0.233425	NA	NA	NA	NA	0.379741	0.0415002	0.22171	0.313612	0.0943902	0.20287	NA	NA	NA	NA	NA	NA	NA	NA	NA	NA	NA	NA	NA	NA	NA	NA	NA	NA	NA	NA
Mammalia	Delphinapterus_leucas	9749	Chordata	Mammalia	Artiodactyla	Monodontidae	GCA_002288925.3	9.3	3217620000	40	Pantheria	1380000	Pantheria	3.68888	14.1376	525	0.00328461	0.0136849	0.240017	NA	NA	NA	NA	0.113558	0.0235785	0.255316	0.0792227	0.0761191	0.185915	982032752	30.73	30845008	0.96	128544	NA	84146328	2.63	70760	NA	422293164	13.21	83142040	2.6	75748	NA	357029592	11.17	4301568	0.13
Mammalia	Monodon_monoceros	40151	Chordata	Mammalia	Artiodactyla	Monodontidae	GCA_005190385.2	9.9	2.85685e+09	40	Pantheria	938000	Pantheria	3.68888	13.7515	512	0.0039593	0.0144319	0.274344	NA	NA	NA	NA	0.113558	0.0231226	0.266498	0.0792227	0.0805107	0.190739	764813824	26.95	22590908	0.79	28932	NA	51150772	1.8	318016	0.01	342735876	12.08	64432836	2.27	71800	NA	272368824	9.6	11115860	0.39
Mammalia	Phocoena_phocoena	9742	Chordata	Mammalia	Artiodactyla	Phocoenidae	GCA_004363495.1	9.1	3.27494e+09	15	Pantheria	52700	Pantheria	2.70805	10.8724	429	0.00567417	0.0193531	0.293192	NA	NA	NA	NA	0.0937193	0.0348911	0.265119	0.0637266	0.0731142	0.194901	978469964	30	50675108	1.55	335456	0.01	112036756	3.43	304496	NA	352639268	10.81	75910132	2.32	57352	NA	384673316	11.79	1838080	0.05
Mammalia	Phocoena_sinus	42100	Chordata	Mammalia	Artiodactyla	Phocoenidae	GCA_008692025.1	8.4	2.87615e+09	NA	NA	43100	Pantheria	NA	10.6713	490	0.00437571	0.0170669	0.256386	NA	NA	NA	NA	0.0937193	0.0265683	0.247471	0.0637266	0.0816376	0.2213	578061360	20.24	32147664	1.12	34256	NA	46703036	1.63	174032	NA	335178256	11.73	75715176	2.65	575896	0.02	76513940	2.67	11019104	0.38
Mammalia	Globicephala_melas	9731	Chordata	Mammalia	Artiodactyla	Delphinidae	GCA_006547405.1	10	2.83058e+09	45	Pantheria	800000	Pantheria	3.80666	13.5924	552	0.00465363	0.0208856	0.222815	NA	NA	NA	NA	0.139101	0.0234472	0.316598	0.0867363	0.0880846	0.181509	515519740	18.34	22764496	0.8	237412	NA	47505816	1.69	221112	NA	289584132	10.3	67804572	2.41	394220	0.01	82771828	2.94	4236152	0.15
Mammalia	Tursiops_aduncus	79784	Chordata	Mammalia	Artiodactyla	Delphinidae	GCA_003227395.1	10.4	3.0364e+09	NA	NA	NA	NA	NA	NA	575	0.00511624	0.0223989	0.228415	NA	NA	NA	NA	0.139101	0.0354418	0.276096	0.0867363	0.120279	0.17545	1002750028	33.17	43228392	1.43	304584	0.01	87565788	2.89	82440	NA	434354560	14.36	67901888	2.24	58292	NA	366960808	12.13	2293276	0.07
Mammalia	Lagenorhynchus_obliquidens	90247	Chordata	Mammalia	Artiodactyla	Delphinidae	GCA_003676395.1	9.3	2.8313e+09	25	Pantheria	110000	Pantheria	3.21888	11.6082	558	0.00480084	0.0221273	0.216964	NA	NA	NA	NA	0.145716	0.0243666	0.288282	0.100708	0.0776965	0.170359	668190024	23.76	19658532	0.69	117976	NA	49053740	1.74	151860	NA	341611664	12.14	67052636	2.38	25872	NA	184980420	6.57	5537324	0.19
Mammalia	Orcinus_orca	9733	Chordata	Mammalia	Artiodactyla	Delphinidae	GCA_000331955.2	9.2	2.87784e+09	100	Pantheria	5630000	Pantheria	4.60517	15.5436	584	0.00443828	0.0198352	0.223758	NA	NA	NA	NA	0.170999	0.0219924	0.346198	0.117032	0.0711606	0.183653	969526672	34.06	9935416	0.34	20576	NA	33338956	1.17	16168	NA	385669880	13.54	41422124	1.45	50052	NA	480034324	16.86	19039176	0.66
Mammalia	Hippopotamus_amphibius	9833	Chordata	Mammalia	Artiodactyla	Hippopotamidae	GCA_004027065.2	14.8	3.31425e+09	54.5	Pantheria	1520000	Pantheria	3.9982	14.2342	694	0.0385965	0.241536	0.159796	777	0.0415742	0.260639	0.159509	0.587001	0.101637	0.16949	0.516572	0.205799	0.143122	NA	NA	NA	NA	NA	NA	NA	NA	NA	NA	NA	NA	NA	NA	NA	NA	NA	NA	NA	NA
Mammalia	Catagonus_wagneri	51154	Chordata	Mammalia	Artiodactyla	Tayassuidae	GCA_004024745.2	3.2	3.20117e+09	9	Pantheria	35200	Pantheria	2.19722	10.4688	778	0.0606865	0.439251	0.138159	876	0.0587721	0.439359	0.133768	0.65946	0.157283	0.153609	0.578644	0.291027	0.147216	863490980	27.09	28051684	0.88	175588	NA	67272132	2.11	118096	NA	267151740	8.38	106593460	3.34	14160	NA	389928676	12.23	4185444	0.13
Mammalia	Camelus_dromedarius	9838	Chordata	Mammalia	Artiodactyla	Camelidae	GCA_000803125.3	4	2562360000	40	Pantheria	488000	Pantheria	3.68888	13.0981	449	0.00394705	0.0207714	0.190024	NA	NA	NA	NA	0.241106	0.00874946	0.181452	0.151211	0.03009	0.157474	711967108	28.06	9997536	0.39	24332	NA	34504976	1.36	58704	NA	173487168	6.83	9678440	0.38	3044	NA	483472100	19.05	740808	0.02
Mammalia	Camelus_ferus	419612	Chordata	Mammalia	Artiodactyla	Camelidae	GCA_009834535.1	3.9	2.5319e+09	NA	NA	NA	NA	NA	NA	479	0.00471866	0.0214112	0.220383	NA	NA	NA	NA	0.241106	0.0107948	0.278332	0.151211	0.0359238	0.14778	NA	NA	NA	NA	NA	NA	NA	NA	NA	NA	NA	NA	NA	NA	NA	NA	NA	NA	NA	NA
Mammalia	Galemys_pyrenaicus	202257	Chordata	Mammalia	Eulipotyphla	Talpidae	GCA_019455555.1	5.3	2.21873e+09	5	Pantheria	59.2	Pantheria	1.60944	4.08092	765	0.0373624	0.28321	0.131925	867	0.0369	0.288107	0.128078	0.355039	0.185009	0.134302	0.320221	0.341582	0.136897	434974244	19.74	4246460	0.19	49536	NA	44640120	2.02	267560	0.01	99047596	4.49	109943060	4.99	9396	NA	174191816	7.9	2578700	0.11
Mammalia	Scalopus_aquaticus	71119	Chordata	Mammalia	Eulipotyphla	Talpidae	GCA_004024925.1	3.9	2.50984e+09	6.2	Pantheria	86.6	Pantheria	1.82455	4.4613	731	0.0389137	0.276947	0.140509	827	0.0384546	0.281573	0.136571	0.32346	0.201438	0.136314	0.272145	0.384258	0.158311	578958084	23.16	22380984	0.89	146424	NA	59341664	2.37	71380	NA	174154452	6.96	36113268	1.44	12628	NA	284279984	11.37	2456904	0.09
Mammalia	Talpa_occidentalis	50954	Chordata	Mammalia	Eulipotyphla	Talpidae	GCA_014898055.1	9.1	2445000000	NA	NA	47.3	Pantheria	NA	3.85651	733	0.0329977	0.2309	0.142909	827	0.0326507	0.232011	0.140729	0.32346	0.165455	0.168551	0.272145	0.346542	0.148146	291965384	12.07	1934612	0.07	NA	NA	40532792	1.67	23112	NA	70634692	2.92	112948492	4.66	NA	NA	62956420	2.6	2935264	0.12
Mammalia	Solenodon_paradoxus	79805	Chordata	Mammalia	Eulipotyphla	Solenodontidae	GCA_004363575.1	1.2	2.55947e+09	11.3333	Pantheria	887	Pantheria	2.42775	6.78784	780	0.0815695	0.604166	0.135012	888	0.0803587	0.611376	0.131439	0.716708	0.209198	0.134804	0.651616	0.364079	0.147337	592717012	23.25	17739204	0.69	76748	NA	38581428	1.51	184376	NA	226990464	8.9	58826944	2.3	7676	NA	248715532	9.75	1594640	0.06
Mammalia	Choloepus_hoffmanni	9358	Chordata	Mammalia	Pilosa	Megalonychidae	GCA_000164785.2	15.5	3.98298e+09	32.1	Pantheria	5510	Pantheria	3.46886	8.61432	654	0.0777533	0.519493	0.149672	737	0.075754	0.521679	0.145212	0.838271	0.138961	0.157735	0.798872	0.289946	0.149287	1372331688	34.83	16163620	0.41	73068	NA	235818264	5.98	421316	0.01	877399288	22.27	7069304	0.17	NA	NA	231088392	5.86	4298436	0.1
Mammalia	Elephas_maximus	9783	Chordata	Mammalia	Proboscidea	Elephantidae	GCA_014332765.1	2.6	3941340000	80	Pantheria	3320000	Pantheria	4.38203	15.0155	777	0.0457427	0.300175	0.152387	882	0.0451269	0.303811	0.148536	0.695134	0.106177	0.165509	0.597505	0.219588	0.116029	1696393032	43.41	44330640	1.13	167848	NA	170589172	4.36	37416	NA	974303252	24.93	221970992	5.68	6500	NA	248930488	6.37	36056724	0.92
Mammalia	Heterohyrax_brucei	77598	Chordata	Mammalia	Hyracoidea	Procaviidae	GCA_004026845.1	3.4	4.38498e+09	14	Pantheria	2450	Pantheria	2.63906	7.80384	703	0.0668016	0.529666	0.12612	794	0.0647355	0.532415	0.121588	0.695134	0.192382	0.139876	0.597505	0.321244	0.109217	2017661040	46.2	69244060	1.58	63588	NA	265222608	6.07	205972	NA	1180169956	27.02	288810700	6.61	9456	NA	212672344	4.87	1258792	0.02
Mammalia	Microgale_talazaci	176115	Chordata	Mammalia	NA	Tenrecidae	GCA_004026705.1	12.2	3.92263e+09	5.83333	Pantheria	47.4	Pantheria	1.76359	3.85862	572	0.111942	0.975357	0.11477	642	0.108535	0.992289	0.109378	0.781128	0.31128	0.13405	0.717717	0.444512	0.125256	1375726352	35.22	98752436	2.52	154860	NA	172864832	4.42	202196	NA	647500440	16.57	143492536	3.67	43968	NA	309305280	7.91	3409012	0.08
Mammalia	Antechinus_stuartii	9283	Chordata	Mammalia	Dasyuromorphia	Dasyuridae	GCA_016696395.1	6.5	4.00849e+09	3	Pantheria	29.7	Pantheria	1.09861	3.39115	712	0.0152332	0.125855	0.121038	NA	NA	NA	NA	0.284139	0.0808517	0.145722	0.290917	0.143973	0.0949637	833873272	20.94	23192252	0.58	162320	NA	25472304	0.63	523308	0.01	179838024	4.51	107419320	2.69	69580	NA	482077700	12.1	15118464	0.37
Mammalia	Sarcophilus_harrisii	9305	Chordata	Mammalia	Dasyuromorphia	Dasyuridae	GCA_902635505.1	4.4	2924220000	13	AnAge	6500	AnAge	2.56495	8.77956	722	0.0153139	0.134055	0.114236	NA	NA	NA	NA	0.284139	0.0774476	0.133627	0.290917	0.147984	0.111781	634218704	21.84	14376020	0.49	27644	NA	13858604	0.47	147128	NA	130314712	4.48	68993928	2.37	258704	NA	395509344	13.62	10732620	0.36
Mammalia	Gymnobelideus_leadbeateri	38618	Chordata	Mammalia	Diprotodontia	Petauridae	GCA_011680675.1	28.8	4.20479e+09	11	Pantheria	137	Pantheria	2.3979	4.91998	576	0.0427008	0.395936	0.107848	636	0.110021	1.0636	0.103442	0.845253	0.0995584	0.117127	0.758116	0.19221	0.0720893	1448372596	34.67	35277156	0.84	224728	NA	11935372	0.28	188776	NA	316161004	7.56	230805696	5.52	67452	NA	836092512	20.01	17619504	0.42
Mammalia	Ornithorhynchus_anatinus	9258	Chordata	Mammalia	Monotremata	Ornithorhynchidae	GCA_004115215.4	1.3	2.25617e+09	22	Pantheria	1480	Pantheria	3.09104	7.2998	702	0.150183	1.65753	0.0906066	798	0.0856261	0.982414	0.0871589	1	0.475179	0.0750556	1	0.45814	0.105849	NA	NA	NA	NA	NA	NA	NA	NA	NA	NA	NA	NA	NA	NA	NA	NA	NA	NA	NA	NA
Aves	Acrocephalus_arundinaceus	39621	Chordata	Aves	Passeriformes	Sylviidae	GCA_013398685.1	1	1.43915e+09	10.1	AnAge	30	CRC_AvianBodyMasses	2.31254	3.4012	566	0.00953673	0.0601407	0.158574	745	0.0136595	0.0814356	0.167733	0.0986919	0.162554	0.226129	0.0881134	0.29934	0.131235	294801328	20.71	17300	NA	NA	NA	45150312	3.17	728	NA	30428112	2.13	98176	NA	208	NA	210817492	14.81	8289000	0.58
Aves	Acrocephalus_scirpaceus_scirpaceus	126889	Chordata	Aves	Passeriformes	Sylviidae	GCA_910950805.1	1.3	1.30703e+09	14	AnAge	12.3	CRC_AvianBodyMasses	2.63906	2.5096	577	0.00863798	0.0568714	0.151886	NA	NA	NA	NA	0.0986919	0.150674	0.226214	0.0881134	0.289551	0.130485	177532948	13.67	238472	0.01	2752	NA	28549888	2.19	25088	NA	26097340	2.01	103084	NA	3388	NA	113293344	8.72	9219592	0.71
Aves	Hippolais_icterina	68497	Chordata	Aves	Passeriformes	Sylviidae	GCA_013400075.1	0.5	1261620000	10.8	AnAge	13.2	CRC_AvianBodyMasses	2.37955	2.58022	581	0.0105732	0.070883	0.149164	754	0.0119923	0.079262	0.151299	0.13364	0.145192	0.206675	0.130416	0.233995	0.12304	249858976	19.93	81928	NA	15456	NA	34656724	2.76	6956	NA	35268396	2.81	191492	0.01	2964	NA	175112840	13.97	4522220	0.36
Aves	Alaudala_cheleensis	670337	Chordata	Aves	Passeriformes	Alaudidae	GCA_013398995.1	0.8	1.29994e+09	NA	NA	NA	NA	NA	NA	587	0.0114375	0.0752894	0.151914	764	0.011523	0.0780292	0.147676	0.0745981	0.338015	0.186383	0.0862358	0.355838	0.128133	175274892	13.57	77528	NA	20004	NA	30476560	2.36	74144	NA	25152372	1.94	182972	0.01	NA	NA	113471448	8.79	5819864	0.45
Aves	Eremophila_alpestris_peregrina	2668079	Chordata	Aves	Passeriformes	Alaudidae	GCA_009792885.1	1	1.26582e+09	8	AnAge	32.2	CRC_AvianBodyMasses	2.07944	3.47197	612	0.0126085	0.084297	0.149573	797	0.0130306	0.0863264	0.150946	0.0745981	0.291713	0.182015	0.0862358	0.322621	0.122807	161271376	12.87	39876	NA	352	NA	14726668	1.17	576	NA	15241272	1.21	78716	NA	NA	NA	128248456	10.23	2935460	0.23
Aves	Cisticola_juncidis	52622	Chordata	Aves	Passeriformes	Cisticolidae	GCA_013400215.1	0.7	1134480000	NA	NA	6.85	CRC_AvianBodyMasses	NA	1.92425	593	0.0336351	0.257741	0.1305	774	0.0337911	0.259249	0.130342	0.280123	0.224486	0.170191	0.225536	0.404554	0.111485	139789564	12.41	59260	NA	9728	NA	18135840	1.61	6204	NA	20103416	1.78	156708	0.01	224	NA	98692992	8.76	2625192	0.23
Aves	Cyanoderma_ruficeps	181631	Chordata	Aves	Passeriformes	Timaliidae	GCA_008694505.1	1.2	1.26632e+09	NA	NA	NA	NA	NA	NA	613	0.0161296	0.106146	0.151957	805	0.0162407	0.108522	0.149653	0.148864	0.19224	0.206669	0.137172	0.263374	0.140601	188339416	14.94	222876	0.01	34176	NA	24416508	1.93	6300	NA	25562864	2.02	284028	0.02	136	NA	135465644	10.74	2346884	0.18
Aves	Pomatorhinus_ruficollis	932028	Chordata	Aves	Passeriformes	Timaliidae	GCA_013401195.1	0.7	1.29489e+09	NA	NA	31.65	CRC_AvianBodyMasses	NA	3.45474	567	0.0120097	0.0755967	0.158865	738	0.0122312	0.077467	0.157889	0.148864	0.163437	0.200399	0.137172	0.218863	0.139365	231877888	18.03	58208	NA	8612	NA	20265600	1.57	96208	NA	31040704	2.41	247740	0.01	2880	NA	176899972	13.75	3257964	0.25
Aves	Donacobius_atricapilla	237420	Chordata	Aves	Passeriformes	Mimidae	GCA_013397315.1	0.8	1.28174e+09	NA	NA	36.8	CRC_AvianBodyMasses	NA	3.6055	597	0.0283661	0.188763	0.150274	775	0.0282837	0.191534	0.147669	0.296078	0.170966	0.188968	0.252307	0.256436	0.139921	180915848	14.23	49088	NA	5044	NA	35229928	2.77	1056	NA	23754828	1.86	177520	0.01	1544	NA	118050828	9.28	3646012	0.28
Aves	Brachypodius_atriceps	182895	Chordata	Aves	Passeriformes	Pycnonotidae	GCA_013398615.1	0.3	1.10327e+09	NA	NA	NA	NA	NA	NA	567	0.0141434	0.0995115	0.142128	734	0.0146223	0.100331	0.145741	0.170419	0.165989	0.184889	0.129334	0.268809	0.102332	135668652	12.38	236544	0.02	7472	NA	15066256	1.37	3968	NA	25403300	2.31	324724	0.02	2372	NA	92431460	8.43	2192556	0.2
Aves	Pycnonotus_jocosus	182897	Chordata	Aves	Passeriformes	Pycnonotidae	GCA_013400435.1	0.9	1.24592e+09	11.1	AnAge	27.4	CRC_AvianBodyMasses	2.40695	3.31054	578	0.0141163	0.0975973	0.144639	761	0.0143921	0.101175	0.142249	0.170419	0.162639	0.183957	0.129334	0.283293	0.114823	216333912	17.49	197644	0.01	2940	NA	25307756	2.04	1724	NA	26744848	2.16	174024	0.01	1568	NA	159949164	12.93	3954244	0.31
Aves	Sinosuthora_webbiana	337173	Chordata	Aves	Passeriformes	Sylviidae	GCA_013397395.1	1.2	1.27703e+09	NA	NA	NA	NA	NA	NA	608	0.0201034	0.149503	0.134468	793	0.0207959	0.151822	0.136975	0.222371	0.177342	0.177833	0.188211	0.244971	0.11731	188913104	14.9	82828	NA	9840	NA	28351912	2.23	18648	NA	26351696	2.07	234292	0.01	1676	NA	129013320	10.17	4848892	0.38
Aves	Sterrhoptilus_dennistouni	2585820	Chordata	Aves	Passeriformes	Zosteropidae	GCA_013397095.1	1	1.27713e+09	NA	NA	NA	NA	NA	NA	588	0.0251992	0.182808	0.137845	768	0.0251825	0.182129	0.138267	0.222371	0.211725	0.196421	0.188211	0.434679	0.115829	138997168	10.96	77572	NA	19636	NA	22864008	1.8	21028	NA	21927948	1.73	181560	0.01	1520	NA	92085932	7.26	1817964	0.14
Aves	Locustella_ochotensis	187437	Chordata	Aves	Passeriformes	Locustellidae	GCA_013400155.1	0.8	1.26403e+09	NA	NA	18.5	CRC_AvianBodyMasses	NA	2.91777	605	0.0267731	0.187289	0.14295	790	0.0264152	0.190904	0.138369	0.294021	0.168698	0.196723	0.259444	0.267166	0.107984	474931672	37.82	25864	NA	8000	NA	44064916	3.5	153460	0.01	30213592	2.4	314412	0.02	716	NA	380932232	30.33	19218480	1.53
Aves	Cettia_cetti	68486	Chordata	Aves	Passeriformes	Sylviidae	GCA_013401135.1	0.6	1.27879e+09	9.3	AnAge	13.35	CRC_AvianBodyMasses	2.23001	2.59152	603	0.0226811	0.15575	0.145625	797	0.022866	0.157178	0.145478	0.246175	0.182216	0.19321	0.201254	0.262779	0.132016	189840080	14.94	84440	NA	9904	NA	27577576	2.17	3180	NA	25470884	2	354732	0.02	376	NA	131194632	10.32	5144356	0.4
Aves	Phylloscopus_trochilus_acredula	209779	Chordata	Aves	Passeriformes	Phylloscopidae	GCA_002305835.1	1	1.29667e+09	11.8	AnAge	8.7	CRC_AvianBodyMasses	2.4681	2.16332	614	0.0264174	0.179153	0.147458	805	0.0264409	0.184757	0.143112	0.246175	0.171473	0.202727	0.201254	0.344943	0.127438	156828224	12.2	76056	NA	1612	NA	26879948	2.09	4288	NA	17600756	1.36	197232	0.01	NA	NA	104173852	8.1	7894084	0.61
Aves	Erythrocercus_mccallii	107208	Chordata	Aves	Passeriformes	Dicruridae	GCA_013397435.1	0.9	1.2526e+09	NA	NA	7.2	CRC_AvianBodyMasses	NA	1.97408	586	0.0218602	0.138489	0.157848	769	0.0220548	0.141325	0.156057	0.26598	0.133248	0.18834	0.238577	0.235485	0.130028	184951192	14.86	96208	NA	2728	NA	22488044	1.8	18848	NA	31777032	2.55	727048	0.05	19144	NA	127481204	10.24	2340936	0.18
Aves	Hylia_prasina	208073	Chordata	Aves	Passeriformes	Sylviidae	GCA_013397195.1	1.2	1.25129e+09	NA	NA	13.1	CRC_AvianBodyMasses	NA	2.57261	599	0.0241149	0.153185	0.157423	780	0.0237354	0.155265	0.15287	0.284473	0.158353	0.205855	0.259547	0.231543	0.126727	218635444	17.58	68304	NA	9780	NA	27009996	2.17	7876	NA	23830604	1.91	207292	0.01	172	NA	164247432	13.21	3253988	0.26
Aves	Nicator_chloris	237433	Chordata	Aves	Passeriformes	Pycnonotidae	GCA_013400495.1	0.9	1.26546e+09	NA	NA	46.2	CRC_AvianBodyMasses	NA	3.83298	567	0.0259119	0.161087	0.160857	745	0.0254143	0.164132	0.154841	0.340876	0.12762	0.203421	0.321954	0.2022	0.113886	294458304	23.43	386292	0.03	19248	NA	31242172	2.48	32056	NA	38636948	3.07	543548	0.04	584	NA	214656728	17.08	8940728	0.71
Aves	Agelaius_phoeniceus	39638	Chordata	Aves	Passeriformes	Icteridae	GCA_013398535.1	0.9	1271400000	20	AnAge	52.4	CRC_AvianBodyMasses	2.99573	3.95891	528	0.0065524	0.0411166	0.159362	NA	NA	NA	NA	0.0768934	0.134655	0.200439	0.0547573	0.232333	0.122823	NA	NA	NA	NA	NA	NA	NA	NA	NA	NA	NA	NA	NA	NA	NA	NA	NA	NA	NA	NA
Aves	Quiscalus_mexicanus	64278	Chordata	Aves	Passeriformes	Icteridae	GCA_013399035.1	0.6	1.26626e+09	12.5	AnAge	169	CRC_AvianBodyMasses	2.52573	5.1299	520	0.0076804	0.0420031	0.182853	NA	NA	NA	NA	0.0768934	0.149332	0.202126	0.0547573	0.289919	0.133033	201924508	16.06	44796	NA	8220	NA	34257392	2.72	12392	NA	22925604	1.82	153164	0.01	NA	NA	139586396	11.1	4936544	0.39
Aves	Setophaga_kirtlandii	298831	Chordata	Aves	Passeriformes	Parulidae	GCA_013399655.1	0.4	1.27169e+09	9	AnAge	15.5	AnAge	2.19722	2.74084	592	0.0157815	0.11003	0.143428	772	0.017092	0.124209	0.137607	0.134367	0.24242	0.176866	0.11403	0.307804	0.110814	467405876	37.03	216080	0.01	2456	NA	34235356	2.71	2760	NA	17936968	1.42	197888	0.01	1860	NA	405375400	32.11	9437108	0.74
Aves	Diglossa_brunneiventris	547948	Chordata	Aves	Passeriformes	Thraupidae	GCA_019023105.1	1.6	1.31235e+09	NA	NA	12	CRC_AvianBodyMasses	NA	2.48491	594	0.0134076	0.0869065	0.154277	774	0.0134049	0.087054	0.153984	0.123609	0.196923	0.19096	0.113712	0.305953	0.143166	198901040	15.25	149052	0.01	47052	NA	31296340	2.4	48164	NA	24680424	1.89	69660	NA	4524	NA	134050116	10.28	8555708	0.65
Aves	Passerina_amoena	142471	Chordata	Aves	Passeriformes	Fringillidae	GCA_013401095.1	0.6	1359420000	9.9	AnAge	15.5	CRC_AvianBodyMasses	2.29253	2.74084	493	0.0120644	0.0717795	0.168076	644	0.0119087	0.0712264	0.167195	0.0900351	0.238137	0.181829	0.0905142	0.38551	0.172114	NA	NA	NA	NA	NA	NA	NA	NA	NA	NA	NA	NA	NA	NA	NA	NA	NA	NA	NA	NA
Aves	Pheucticus_melanocephalus	371919	Chordata	Aves	Passeriformes	Fringillidae	GCA_013398405.1	0.8	1.27489e+09	25	AnAge	47.15	CRC_AvianBodyMasses	3.21888	3.85333	528	0.0109284	0.067731	0.16135	689	0.0112206	0.0680822	0.16481	0.0900351	0.213726	0.193024	0.0905142	0.257568	0.141243	NA	NA	NA	NA	NA	NA	NA	NA	NA	NA	NA	NA	NA	NA	NA	NA	NA	NA	NA	NA
Aves	Melospiza_melodia	44397	Chordata	Aves	Passeriformes	Passerellidae	GCA_013398205.1	1.3	1398540000	11.3	AnAge	20	CRC_AvianBodyMasses	2.4248	2.99573	606	0.0117025	0.0776547	0.150698	803	0.0219038	0.154362	0.141899	0.071325	0.257677	0.183736	0.0689213	0.385181	0.129643	330461240	23.83	83156	NA	131940	NA	33358740	2.4	27164	NA	21460916	1.54	192388	0.01	NA	NA	266996508	19.25	8210428	0.59
Aves	Zonotrichia_albicollis	44394	Chordata	Aves	Passeriformes	Passerellidae	GCA_000385455.1	0.5	1300740000	14.9	AnAge	24.4	CRC_AvianBodyMasses	2.70136	3.19458	551	0.0130006	0.0793022	0.163938	NA	NA	NA	NA	0.071325	0.290433	0.189771	0.0689213	0.390634	0.119049	218197980	16.95	117436	NA	13208	NA	37028776	2.87	56796	NA	17731416	1.37	92100	NA	NA	NA	155958332	12.12	7199916	0.55
Aves	Fringilla_coelebs_coelebs	1471794	Chordata	Aves	Passeriformes	Fringillidae	GCA_015532645.2	0.8	1.20994e+09	29	AnAge	21.4	CRC_AvianBodyMasses	3.3673	3.06339	591	0.015343	0.102049	0.15035	763	0.0151734	0.101846	0.148984	0.183324	0.17874	0.20337	0.154396	0.241723	0.134368	249381188	20.75	134112	0.01	21360	NA	27643304	2.3	26800	NA	17715392	1.47	196712	0.01	584	NA	190395952	15.84	13246972	1.1
Aves	Hemignathus_wilsoni	2518271	Chordata	Aves	Passeriformes	Fringillidae	GCA_009690805.1	0.8	1.25549e+09	13	AnAge	28	AnAge	2.56495	3.3322	587	0.0117737	0.0685685	0.171707	NA	NA	NA	NA	0.137809	0.142164	0.194976	0.120563	0.263643	0.13905	125181524	10.05	38808	NA	1796	NA	26108992	2.09	15192	NA	17061068	1.37	157252	0.01	868	NA	77997872	6.26	3799676	0.3
Aves	Loxia_curvirostra	64802	Chordata	Aves	Passeriformes	Fringillidae	GCA_013398455.1	0.9	1.25037e+09	16.1	AnAge	36.4	CRC_AvianBodyMasses	2.77882	3.59457	470	0.00381583	0.0213643	0.178608	810	0.0166511	0.113081	0.147249	0.0271709	0.172848	0.224866	0.0344953	0.201759	0.109279	279957340	22.58	73084	NA	NA	NA	50848376	4.1	1888	NA	21082244	1.7	81304	NA	2592	NA	202453160	16.33	5414692	0.43
Aves	Loxia_leucoptera	96539	Chordata	Aves	Passeriformes	Fringillidae	GCA_013396895.1	0.9	1.24981e+09	4	AnAge	25.2	CRC_AvianBodyMasses	1.38629	3.22684	434	0.00417031	0.02041	0.204327	NA	NA	NA	NA	0.0271709	0.180956	0.211012	0.0344953	0.31428	0.10669	287623768	23.18	66480	NA	10212	NA	42770016	3.44	1644	NA	20845768	1.68	140728	0.01	3976	NA	216118800	17.42	7666144	0.61
Aves	Montifringilla_adamsi	356906	Chordata	Aves	Passeriformes	Passeridae	GCA_017590115.1	1	1.27353e+09	NA	NA	NA	NA	NA	NA	566	0.00652471	0.0374855	0.17406	NA	NA	NA	NA	0.0850766	0.128542	0.202557	0.0929132	0.145501	0.146791	211212492	16.78	15248	NA	NA	NA	18238004	1.44	NA	NA	15190464	1.2	45252	NA	NA	NA	145541568	11.56	32181956	2.55
Aves	Pyrgilauda_ruficollis	221976	Chordata	Aves	Passeriformes	Passeridae	GCA_017590135.1	1	1.27181e+09	NA	NA	NA	NA	NA	NA	525	0.00570997	0.0322449	0.177082	NA	NA	NA	NA	0.0850766	0.110098	0.202118	0.0929132	0.108021	0.140334	163958776	13.02	13368	NA	6308	NA	16623528	1.32	NA	NA	17541924	1.39	45420	NA	57052	NA	123381636	9.8	6289540	0.49
Aves	Onychostruthus_taczanowskii	356909	Chordata	Aves	Passeriformes	Passeridae	GCA_017590055.1	0.5	1.25699e+09	NA	NA	NA	NA	NA	NA	574	0.00809556	0.0460414	0.175832	NA	NA	NA	NA	0.101604	0.132668	0.202744	0.122301	0.115707	0.156973	115691364	9.31	12368	NA	4132	NA	14044208	1.13	NA	NA	14109344	1.13	9040	NA	NA	NA	80946120	6.51	6566152	0.52
Aves	Passer_domesticus	48849	Chordata	Aves	Passeriformes	Passeridae	GCA_001700915.1	0.7	1535460000	23	AnAge	27.7	CRC_AvianBodyMasses	3.13549	3.32143	525	0.00591851	0.0358262	0.1652	NA	NA	NA	NA	0.0719868	0.145527	0.241326	0.0601728	0.220332	0.100039	337793160	22.24	165060	0.01	NA	NA	27743772	1.82	2304	NA	21613468	1.42	4564	NA	NA	NA	278993176	18.37	9270816	0.61
Aves	Passer_montanus	9160	Chordata	Aves	Passeriformes	Passeridae	GCA_014805655.1	0.9	1.26453e+09	13.1	AnAge	22	CRC_AvianBodyMasses	2.57261	3.09104	563	0.00632209	0.0389476	0.162323	809	0.0260122	0.181449	0.143358	0.0719868	0.142787	0.228465	0.0601728	0.224996	0.103012	159189096	12.74	32148	NA	NA	NA	18852824	1.5	NA	NA	15039568	1.2	71808	NA	NA	NA	121193764	9.69	3998984	0.32
Aves	Urocynchramus_pylzowi	571890	Chordata	Aves	Passeriformes	Fringillidae	GCA_013397555.1	0.7	1.25357e+09	NA	NA	NA	NA	NA	NA	601	0.0220803	0.138308	0.159645	787	0.0214982	0.139502	0.154107	0.257366	0.16386	0.191834	0.219176	0.237577	0.146115	231999108	18.64	114912	NA	42268	NA	24186876	1.94	1840	NA	25859332	2.07	214312	0.01	5200	NA	173575192	13.94	7999176	0.64
Aves	Peucedramus_taeniatus	135441	Chordata	Aves	Passeriformes	Fringillidae	GCA_013400575.1	0.4	1.26158e+09	NA	NA	11	CRC_AvianBodyMasses	NA	2.3979	566	0.0241542	0.15675	0.154094	744	0.0242183	0.160819	0.150593	0.270554	0.180308	0.202222	0.23348	0.236585	0.120548	287729024	22.97	162616	0.01	20692	NA	39811736	3.17	8588	NA	28307164	2.26	211596	0.01	NA	NA	208501296	16.64	10705336	0.85
Aves	Ploceus_nigricollis	441696	Chordata	Aves	Passeriformes	Ploceidae	GCA_013399945.1	0.8	1.25907e+09	NA	NA	27.1	CRC_AvianBodyMasses	NA	3.29953	593	0.0184788	0.115469	0.160033	772	0.0185237	0.116619	0.15884	0.277698	0.12308	0.180094	0.253005	0.173735	0.125845	209826420	16.78	119676	NA	2840	NA	31037496	2.48	7596	NA	30072368	2.4	236944	0.01	1096	NA	143981072	11.52	4367332	0.34
Aves	Dicaeum_eximium	667154	Chordata	Aves	Passeriformes	Dicaeidae	GCA_013396995.1	0.9	1.23437e+09	NA	NA	7.9	CRC_AvianBodyMasses	NA	2.06686	606	0.0305179	0.190184	0.160465	797	0.0304013	0.191633	0.158643	0.319251	0.148602	0.197748	0.28314	0.268142	0.129095	206298396	16.83	147144	0.01	488	NA	26219036	2.14	41572	NA	20618244	1.68	175684	0.01	21168	NA	149413008	12.19	9662052	0.78
Aves	Certhia_americana	186443	Chordata	Aves	Passeriformes	Certhiidae	GCA_018697195.1	1.7	1173600000	NA	NA	8.1	CRC_AvianBodyMasses	NA	2.09186	533	0.00601226	0.034815	0.172692	NA	NA	NA	NA	0.04368	0.202029	0.193831	0.0495373	0.245557	0.129978	127533008	10.94	33180	NA	NA	NA	19781592	1.69	25572	NA	17114552	1.46	101196	NA	1720	NA	86776884	7.44	3698312	0.31
Aves	Certhia_brachydactyla	73330	Chordata	Aves	Passeriformes	Certhiidae	GCA_013400355.1	0.5	1.251e+09	NA	NA	8.2	CRC_AvianBodyMasses	NA	2.10413	533	0.00576088	0.0367971	0.156558	NA	NA	NA	NA	0.04368	0.169183	0.198047	0.0495373	0.287795	0.133664	161901148	13.03	75960	NA	8416	NA	22077552	1.77	548	NA	21160508	1.7	160052	0.01	2768	NA	116030524	9.34	2384820	0.19
Aves	Polioptila_caerulea	66707	Chordata	Aves	Passeriformes	Certhiidae	GCA_013397295.1	0.6	1349640000	4.2	AnAge	5.8	CRC_AvianBodyMasses	1.43508	1.75786	599	0.0175943	0.119366	0.147398	779	0.0180428	0.121224	0.148839	0.178413	0.190551	0.182046	0.152646	0.269446	0.108267	184868140	13.79	77520	NA	12068	NA	31861824	2.37	4712	NA	27270644	2.03	278356	0.02	1904	NA	118263052	8.82	7098060	0.52
Aves	Thryothorus_ludovicianus	74200	Chordata	Aves	Passeriformes	Certhiidae	GCA_013397245.1	0.6	1.25422e+09	9.2	AnAge	17.2	CRC_AvianBodyMasses	2.2192	2.84491	588	0.0218306	0.154397	0.141393	775	0.0225113	0.157568	0.142867	0.178413	0.252701	0.185844	0.152646	0.33763	0.135592	196169264	15.76	64068	NA	11016	NA	32088236	2.57	10064	NA	24986252	2	3882168	0.31	1176	NA	111362876	8.94	23763408	1.9
Aves	Sitta_europaea	50251	Chordata	Aves	Passeriformes	Sittidae	GCA_013400255.1	1.2	1.24131e+09	12.9	AnAge	22.6	CRC_AvianBodyMasses	2.55723	3.11795	589	0.0313137	0.206311	0.151779	769	0.0300293	0.201642	0.148924	0.272087	0.195047	0.19637	0.229132	0.325142	0.114669	183449876	14.88	98676	NA	9156	NA	29653676	2.4	4756	NA	21605008	1.75	118332	NA	1376	NA	125406008	10.17	6552888	0.53
Aves	Cyanistes_caeruleus	156563	Chordata	Aves	Passeriformes	Paridae	GCA_002901205.1	0.4	1.44246e+09	14.6	AnAge	10.6	CRC_AvianBodyMasses	2.68102	2.36085	607	0.029158	0.195006	0.149523	791	0.0296484	0.19969	0.148472	0.302301	0.182829	0.183551	0.26027	0.277878	0.120706	162356424	11.36	41320	NA	19296	NA	22362760	1.56	2932	NA	16176800	1.13	56108	NA	668	NA	121502280	8.5	2194260	0.15
Aves	Chloebia_gouldiae	44316	Chordata	Aves	Passeriformes	Passeridae	GCA_003676055.1	3	1.30183e+09	NA	NA	13.8	CRC_AvianBodyMasses	NA	2.62467	599	0.0170528	0.0940143	0.181385	773	0.0170934	0.0951687	0.179611	0.133122	0.208581	0.219938	0.101128	0.327572	0.135391	NA	NA	NA	NA	NA	NA	NA	NA	NA	NA	NA	NA	NA	NA	NA	NA	NA	NA	NA	NA
Aves	Taeniopygia_guttata	59729	Chordata	Aves	Passeriformes	Estrildidae	GCA_003957565.4	1.2	1222500000	12	AnAge	12.05	CRC_AvianBodyMasses	2.48491	2.48906	615	0.016769	0.100294	0.167198	802	0.016535	0.10263	0.161112	0.133122	0.193446	0.214707	0.101128	0.383262	0.133507	NA	NA	NA	NA	NA	NA	NA	NA	NA	NA	NA	NA	NA	NA	NA	NA	NA	NA	NA	NA
Aves	Vidua_chalybeata	81927	Chordata	Aves	Passeriformes	Estrildidae	GCA_013398495.1	1.4	1134480000	NA	NA	12.5	CRC_AvianBodyMasses	NA	2.52573	618	0.0163671	0.0959676	0.170548	810	0.0162726	0.0979714	0.166095	0.197646	0.139145	0.194302	0.169861	0.192187	0.157762	92321096	8.19	70364	NA	3836	NA	19174292	1.7	2380	NA	18208072	1.61	186416	0.01	2524	NA	52625768	4.67	2047444	0.18
Aves	Irena_cyanogastra	175120	Chordata	Aves	Passeriformes	Irenidae	GCA_013397155.1	0.8	1.26039e+09	NA	NA	NA	NA	NA	NA	591	0.0239478	0.161005	0.148739	770	0.0243546	0.165489	0.147167	0.304788	0.147845	0.199047	0.238349	0.243998	0.118048	314932444	25.17	133140	0.01	6424	NA	32009688	2.55	15340	NA	26350224	2.1	167368	0.01	2052	NA	227126408	18.15	29121800	2.32
Aves	Leptocoma_aspasia	2585812	Chordata	Aves	Passeriformes	Nectariniidae	GCA_013399835.1	1.7	1.25943e+09	NA	NA	NA	NA	NA	NA	604	0.0243368	0.152532	0.159552	792	0.0248745	0.155506	0.159959	0.325841	0.133727	0.190234	0.268844	0.202708	0.134157	194176460	15.52	69672	NA	14788	NA	22107952	1.76	8364	NA	26425156	2.11	252912	0.02	5828	NA	141327516	11.29	3964272	0.31
Aves	Promerops_cafer	254652	Chordata	Aves	Passeriformes	Nectariniidae	GCA_013398275.1	0.7	1.2691e+09	NA	NA	34.85	CRC_AvianBodyMasses	NA	3.55105	604	0.022619	0.141719	0.159605	780	0.022693	0.142064	0.159737	0.344454	0.114525	0.182301	0.315036	0.151492	0.140424	99154796	7.89	39084	NA	NA	NA	28073540	2.23	4800	NA	20955584	1.66	53180	NA	NA	NA	48126704	3.83	1901904	0.15
Aves	Anthoscopus_minutus	156561	Chordata	Aves	Passeriformes	Paridae	GCA_013399455.1	0.1	1.19056e+09	NA	NA	6.6	CRC_AvianBodyMasses	NA	1.88707	577	0.033158	0.218089	0.152039	768	0.0328345	0.223119	0.147162	0.349985	0.168544	0.212116	0.309407	0.318834	0.101443	368887420	31.21	76116	NA	7064	NA	54268312	4.59	27868	NA	31317880	2.65	189600	0.01	1828	NA	274100616	23.19	8898136	0.75
Aves	Bombycilla_garrulus	125297	Chordata	Aves	Passeriformes	Bombycillidae	GCA_013400315.1	0.3	1.25503e+09	13.5	AnAge	56.4	CRC_AvianBodyMasses	2.60269	4.03247	598	0.0249593	0.153433	0.162673	782	0.0248764	0.154173	0.161354	0.227188	0.183353	0.202905	0.205292	0.302483	0.137398	349778972	28.07	62368	NA	162516	0.01	48011952	3.85	188604	0.01	22631928	1.81	174336	0.01	716	NA	266018356	21.35	12528196	1
Aves	Phainopepla_nitens	161653	Chordata	Aves	Passeriformes	Bombycillidae	GCA_013400175.1	0.3	1789740000	NA	NA	22.1	CRC_AvianBodyMasses	NA	3.09558	586	0.0208957	0.125067	0.167076	762	0.02081	0.127147	0.163668	0.227188	0.154179	0.190581	0.205292	0.215716	0.156611	543934820	30.61	163548	NA	22072	NA	61459544	3.45	9252	NA	28188136	1.58	242044	0.01	3128	NA	382603624	21.53	71243472	4.01
Aves	Catharus_fuscescens	159581	Chordata	Aves	Passeriformes	Turdidae	GCA_013398975.1	0.6	1310520000	10.1	AnAge	31.9	CRC_AvianBodyMasses	2.31254	3.46261	589	0.0180747	0.122313	0.147774	770	0.0187551	0.125171	0.149835	0.208595	0.166373	0.197763	0.164186	0.24304	0.0936984	300252720	23.06	789320	0.06	53672	NA	48751612	3.74	1976	NA	25426068	1.95	214268	0.01	860	NA	207696352	15.95	17318592	1.33
Aves	Sialia_sialis	172413	Chordata	Aves	Passeriformes	Turdidae	GCA_009812075.1	0.5	1251840000	10.5	AnAge	27.5	CRC_AvianBodyMasses	2.35138	3.31419	568	0.0216699	0.148012	0.146406	746	0.0221047	0.150882	0.146503	0.208595	0.184378	0.205108	0.164186	0.33527	0.0981414	310386472	24.96	1026404	0.08	17808	NA	37920580	3.05	34392	NA	18937948	1.52	135760	0.01	4900	NA	236031672	18.98	16277008	1.3
Aves	Cercotrichas_coryphoeus	614051	Chordata	Aves	Passeriformes	Muscicapidae	GCA_013398595.1	0.6	1.25228e+09	NA	NA	NA	NA	NA	NA	584	0.0117963	0.0676155	0.174462	753	0.0118472	0.0694035	0.1707	0.121257	0.161121	0.204975	0.127972	0.199114	0.124175	284467244	22.87	53536	NA	1696	NA	42120608	3.38	33628	NA	24145904	1.94	110340	NA	2152	NA	172539712	13.87	45459668	3.65
Aves	Copsychus_sechellarum	797021	Chordata	Aves	Passeriformes	Muscicapidae	GCA_013398635.1	0.6	1.27921e+09	NA	NA	71	CRC_AvianBodyMasses	NA	4.26268	600	0.0122471	0.0741532	0.165159	782	0.0121209	0.0740206	0.163751	0.121257	0.156796	0.21189	0.127972	0.204038	0.111523	401878264	31.63	64936	NA	15320	NA	54488916	4.28	27696	NA	18050936	1.42	78152	NA	28480	NA	312028244	24.55	17095584	1.34
Aves	Erithacus_rubecula	37610	Chordata	Aves	Passeriformes	Turdidae	GCA_903797595.2	0.8	1.32114e+09	19.3	AnAge	17.7	CRC_AvianBodyMasses	2.96011	2.87356	615	0.0201023	0.130476	0.154069	805	0.0203552	0.135152	0.150609	0.150799	0.233976	0.192885	0.119276	0.362222	0.131641	431630764	32.88	52464	NA	NA	NA	48324204	3.68	149480	0.01	13791288	1.05	53004	NA	736	NA	158693384	12.09	210566204	16.04
Aves	Saxicola_maurus_maurus	1187130	Chordata	Aves	Passeriformes	Muscicapidae	GCA_900205225.1	0.4	1.24081e+09	NA	NA	NA	NA	NA	NA	597	0.0147582	0.0931368	0.158457	786	0.0153439	0.0954901	0.160686	0.150799	0.184	0.195944	0.119276	0.29236	0.122796	207333936	16.88	67944	NA	3872	NA	32866084	2.67	696	NA	16065328	1.3	112276	NA	4536	NA	102584876	8.35	55628324	4.53
Aves	Lamprotornis_superbus	245042	Chordata	Aves	Passeriformes	Sturnidae	GCA_015883425.1	1.3	1.298e+09	NA	NA	64.9	CRC_AvianBodyMasses	NA	4.17285	612	0.0101646	0.0645739	0.15741	NA	NA	NA	NA	0.145998	0.115445	0.207169	0.136325	0.193897	0.106447	NA	NA	NA	NA	NA	NA	NA	NA	NA	NA	NA	NA	NA	NA	NA	NA	NA	NA	NA	NA
Aves	Leucopsar_rothschildi	127929	Chordata	Aves	Passeriformes	Sturnidae	GCA_014363365.1	0.4	1.21577e+09	25	AnAge	91.3	CRC_AvianBodyMasses	3.21888	4.51415	559	0.00816602	0.0450618	0.181218	NA	NA	NA	NA	0.0723028	0.169096	0.225163	0.0728783	0.209648	0.121226	213862240	17.71	7376820	0.61	11440	NA	30110580	2.49	880	NA	22596724	1.87	189684	0.01	NA	NA	148639960	12.31	4936152	0.4
Aves	Sturnus_vulgaris	9172	Chordata	Aves	Passeriformes	Sturnidae	GCA_001447265.1	0.9	1290960000	22.9	AnAge	86	CRC_AvianBodyMasses	3.13114	4.45435	584	0.00745317	0.0450609	0.165402	827	0.0179011	0.119643	0.149621	0.0723028	0.184909	0.231009	0.0728783	0.228826	0.130307	171943152	13.46	285096	0.02	NA	NA	28606488	2.24	16340	NA	18316936	1.43	186268	0.01	NA	NA	115436780	9.03	9095244	0.71
Aves	Toxostoma_redivivum	99882	Chordata	Aves	Passeriformes	Mimidae	GCA_013397375.1	0.5	1.25546e+09	6.9	AnAge	84.4	CRC_AvianBodyMasses	1.93152	4.43557	610	0.0168059	0.11161	0.150577	791	0.0168686	0.11231	0.150197	0.226958	0.136445	0.208976	0.20213	0.251705	0.118729	171609728	13.77	107564	NA	30296	NA	33229908	2.66	2224	NA	24049260	1.93	239556	0.01	NA	NA	108600740	8.71	5350180	0.42
Aves	Drymodes_brunneopygia	626378	Chordata	Aves	Passeriformes	Petroicidae	GCA_013400955.1	0.5	1.28753e+09	NA	NA	33.15	CRC_AvianBodyMasses	NA	3.50104	572	0.0187132	0.122694	0.15252	749	0.0186854	0.124417	0.150184	0.216564	0.146475	0.19614	0.205183	0.256698	0.126735	250935364	19.61	119032	NA	17432	NA	31634148	2.47	720	NA	48133852	3.76	203092	0.01	600	NA	144774928	11.31	26051560	2.03
Aves	Eopsaltria_australis	44318	Chordata	Aves	Passeriformes	Petroicidae	GCA_003426825.1	3.6	1.49253e+09	NA	NA	20.25	CRC_AvianBodyMasses	NA	3.00815	592	0.0173124	0.122911	0.140853	770	0.0175236	0.123268	0.142159	0.216564	0.139133	0.200843	0.205183	0.235317	0.117615	387669000	26.14	115916	NA	5692	NA	59575824	4.01	10396	NA	26187004	1.76	244376	0.01	42072	NA	294378392	19.85	7109328	0.47
Aves	Melanocharis_versteri	254552	Chordata	Aves	Passeriformes	Melanocharitidae	GCA_013397845.1	0.4	1.25312e+09	NA	NA	15	CRC_AvianBodyMasses	NA	2.70805	602	0.0218742	0.149521	0.146296	794	0.0226391	0.153078	0.147893	0.396862	0.109404	0.186449	0.358516	0.149445	0.106955	182104128	14.64	109644	NA	10392	NA	15058868	1.21	3660	NA	22262600	1.79	253968	0.02	NA	NA	139434064	11.21	4970932	0.39
Aves	Callaeas_wilsoni	1347786	Chordata	Aves	Passeriformes	Callaeidae	GCA_013398955.1	0.4	1.27369e+09	NA	NA	NA	NA	NA	NA	610	0.0207846	0.140571	0.147859	800	0.0207075	0.143442	0.144361	0.373396	0.104899	0.200732	0.35009	0.15315	0.141579	213185336	16.85	48424	NA	27312	NA	21203760	1.67	2376	NA	30733504	2.42	381700	0.03	1312	NA	155985680	12.33	4801268	0.37
Aves	Notiomystis_cincta	366454	Chordata	Aves	Passeriformes	Meliphagidae	GCA_013398075.1	0.1	1.24669e+09	NA	NA	93.5	CRC_AvianBodyMasses	NA	4.53796	582	0.0324191	0.241966	0.133982	764	0.0323468	0.244494	0.132301	0.373396	0.172814	0.172126	0.35009	0.2681	0.120132	196778248	15.91	71832	NA	638596	0.05	17018736	1.37	856	NA	21001448	1.69	177472	0.01	NA	NA	154403180	12.48	3466128	0.28
Aves	Cnemophilus_loriae	254448	Chordata	Aves	Passeriformes	Corvidae	GCA_013397755.1	0.6	1.2688e+09	NA	NA	84.6	CRC_AvianBodyMasses	NA	4.43793	612	0.0226048	0.154	0.146784	805	0.0223989	0.154529	0.144949	0.421043	0.105422	0.185086	0.385208	0.139537	0.122081	NA	NA	NA	NA	NA	NA	NA	NA	NA	NA	NA	NA	NA	NA	NA	NA	NA	NA	NA	NA
Aves	Aleadryas_rufinucha	461220	Chordata	Aves	Passeriformes	NA	GCA_013397815.1	0.4	1.2768e+09	NA	NA	40.5	CRC_AvianBodyMasses	NA	3.7013	582	0.0194068	0.129281	0.150114	761	0.0196687	0.131362	0.149729	0.343298	0.108528	0.204951	0.271485	0.179054	0.108175	135607216	10.7	109884	NA	19140	NA	21037768	1.66	8036	NA	28865068	2.27	306624	0.02	1796	NA	82225396	6.48	3033504	0.23
Aves	Oreocharis_arfaki	979223	Chordata	Aves	Passeriformes	Paramythiidae	GCA_013398015.1	0.4	1.26404e+09	NA	NA	19.7	CRC_AvianBodyMasses	NA	2.98062	606	0.0207492	0.139509	0.14873	805	0.0209797	0.142581	0.147142	0.343298	0.117279	0.194392	0.271485	0.167727	0.112291	128338976	10.22	107028	NA	4796	NA	15902268	1.26	4560	NA	27063532	2.15	294796	0.02	928	NA	82953044	6.61	2008024	0.16
Aves	Myiagra_hebetior	381031	Chordata	Aves	Passeriformes	Monarchidae	GCA_013397015.1	0.6	1.27655e+09	NA	NA	20.2	CRC_AvianBodyMasses	NA	3.00568	606	0.0198033	0.142248	0.139216	799	0.0202101	0.144053	0.140296	0.283315	0.131072	0.18642	0.226465	0.245583	0.129319	143509040	11.32	97964	NA	11164	NA	23835092	1.88	4492	NA	27274372	2.15	269076	0.02	1036	NA	88885952	7.01	3129892	0.24
Aves	Rhipidura_dahli	667186	Chordata	Aves	Passeriformes	Rhipiduridae	GCA_013399225.1	0.5	1.23968e+09	NA	NA	9.9	CRC_AvianBodyMasses	NA	2.29253	609	0.0234765	0.170303	0.137851	804	0.0232919	0.169961	0.137043	0.283315	0.149313	0.193773	0.226465	0.320449	0.0989783	114672180	9.31	103236	NA	51312	NA	15658708	1.27	1068	NA	27301828	2.21	249004	0.02	1300	NA	69681356	5.66	1624368	0.13
Aves	Oriolus_oriolus	181099	Chordata	Aves	Passeriformes	Corvidae	GCA_013400235.1	0.3	1.2632e+09	14.8	AnAge	79	CRC_AvianBodyMasses	2.69463	4.36945	610	0.0219255	0.137354	0.159628	798	0.0213155	0.137765	0.154723	0.347129	0.119276	0.211184	0.297987	0.158581	0.129335	192749924	15.37	194964	0.01	21332	NA	45282360	3.61	4932	NA	24720748	1.97	258708	0.02	11620	NA	113136068	9.02	9119192	0.72
Aves	Daphoenositta_chrysoptera	254528	Chordata	Aves	Passeriformes	NA	GCA_013397915.1	0.3	1.25692e+09	NA	NA	11.7	CRC_AvianBodyMasses	NA	2.45959	603	0.0252995	0.166071	0.152341	790	0.0248641	0.167725	0.148243	0.334672	0.13519	0.201234	0.257071	0.23707	0.133545	186963880	14.97	78060	NA	NA	NA	28628692	2.29	4532	NA	25377364	2.03	206500	0.01	NA	NA	122037156	9.77	10631576	0.85
Aves	Edolisoma_coerulescens	2585810	Chordata	Aves	Passeriformes	Campephagidae	GCA_013397115.1	0.9	1.26753e+09	NA	NA	NA	NA	NA	NA	609	0.0196915	0.120882	0.162898	795	0.0197742	0.123473	0.16015	0.334672	0.103877	0.211353	0.257071	0.171002	0.139478	130653876	10.38	126508	0.01	6236	NA	15654624	1.24	5032	NA	27443100	2.18	255480	0.02	1104	NA	84707852	6.73	2453940	0.19
Aves	Eulacestoma_nigropectus	461239	Chordata	Aves	Passeriformes	NA	GCA_013397775.1	0.5	1.2651e+09	NA	NA	20	CRC_AvianBodyMasses	NA	2.99573	612	0.0188377	0.116394	0.161844	815	0.0185825	0.118053	0.157408	0.337364	0.105419	0.212609	0.270164	0.144214	0.122102	166889176	13.27	120332	NA	3844	NA	22619264	1.79	13040	NA	31314468	2.49	334400	0.02	3920	NA	105871544	8.42	6608364	0.52
Aves	Pachycephala_philippinensis	449367	Chordata	Aves	Passeriformes	NA	GCA_013397055.1	0.6	1.26665e+09	NA	NA	22.3	CRC_AvianBodyMasses	NA	3.10459	593	0.0196434	0.131342	0.149559	774	0.0201747	0.133631	0.150973	0.337364	0.107977	0.195604	0.270164	0.186154	0.129602	231995168	18.45	87536	NA	13676	NA	25158460	2	7508	NA	25189188	2	229372	0.01	NA	NA	163441860	13	17867568	1.42
Aves	Mohoua_ochrocephala	874463	Chordata	Aves	Passeriformes	Acanthizidae	GCA_013398855.1	0.6	1.2628e+09	NA	NA	27.75	CRC_AvianBodyMasses	NA	3.32324	590	0.0201932	0.167613	0.120475	770	0.0205997	0.168614	0.122171	0.371038	0.110115	0.176145	0.304926	0.159262	0.118005	136620752	10.89	141040	0.01	43208	NA	24113812	1.92	5676	NA	28283532	2.25	304340	0.02	1928	NA	81386532	6.48	2340288	0.18
Aves	Aphelocoma_coerulescens	39617	Chordata	Aves	Passeriformes	Corvidae	GCA_013398375.1	0.8	1.28981e+09	15	AnAge	77.15	CRC_AvianBodyMasses	2.70805	4.34575	588	0.00855589	0.0560031	0.152775	NA	NA	NA	NA	0.167621	0.10416	0.187004	0.135983	0.158334	0.124192	547815580	42.94	35760	NA	14684	NA	49784984	3.9	55716	NA	54850624	4.29	64924	NA	1240	NA	374822092	29.38	68185556	5.34
Aves	Coloeus_monedula	30423	Chordata	Aves	Passeriformes	Corvidae	GCA_013407035.1	0.8	1.25956e+09	20.3	AnAge	246	AnAge	3.01062	5.50533	564	0.0106756	0.046957	0.227348	750	0.0148049	0.0770404	0.19217	0.100645	0.134719	0.226319	0.100794	0.220034	0.158338	NA	NA	NA	NA	NA	NA	NA	NA	NA	NA	NA	NA	NA	NA	NA	NA	NA	NA	NA	NA
Aves	Corvus_cornix_cornix	932674	Chordata	Aves	Passeriformes	Corvidae	GCA_000738735.5	0.8	1.25353e+09	16.8	AnAge	NA	NA	2.82138	NA	481	0.0036971	0.0209697	0.176307	NA	NA	NA	NA	0.0584869	0.0635537	0.215912	0.0605604	0.121237	0.143321	108228096	8.73	35348	NA	4076	NA	18511532	1.49	1360	NA	12660332	1.02	82496	NA	NA	NA	61835764	4.98	15097188	1.21
Aves	Corvus_hawaiiensis	134902	Chordata	Aves	Passeriformes	Corvidae	GCA_003402825.1	31.8	1.29479e+09	25	AnAge	520	CRC_AvianBodyMasses	3.21888	6.25383	309	0.00427837	0.0238777	0.179179	498	0.00724607	0.0426273	0.169987	NA	NA	NA	NA	NA	NA	NA	NA	NA	NA	NA	NA	NA	NA	NA	NA	NA	NA	NA	NA	NA	NA	NA	NA	NA	NA
Aves	Corvus_macrorhynchos	36249	Chordata	Aves	Passeriformes	Corvidae	GCA_014363025.1	0.9	1.23847e+09	NA	NA	482.25	CRC_AvianBodyMasses	NA	6.17846	447	0.00416222	0.0213304	0.195131	NA	NA	NA	NA	0.0584869	0.104216	0.223311	0.0605604	0.129962	0.144004	185963640	15.12	87408	NA	31820	NA	30036544	2.44	2344	NA	26874972	2.18	232612	0.01	892	NA	110334180	8.97	18362868	1.49
Aves	Dicrurus_megarhynchus	450177	Chordata	Aves	Passeriformes	Dicruridae	GCA_013399195.1	0.7	1.27851e+09	NA	NA	130	CRC_AvianBodyMasses	NA	4.86753	616	0.0170251	0.104149	0.163469	809	0.0164332	0.103151	0.159312	0.280562	0.103591	0.200235	0.239784	0.165036	0.117578	139521688	10.99	96484	NA	6736	NA	17996412	1.41	12892	NA	32761928	2.58	254644	0.02	1844	NA	83799936	6.6	4590812	0.36
Aves	Struthidea_cinerea	181839	Chordata	Aves	Passeriformes	Corcoracidae	GCA_013397865.1	0.5	1.26713e+09	25	AnAge	132	CRC_AvianBodyMasses	3.21888	4.8828	611	0.0162246	0.102075	0.158948	803	0.0164001	0.104192	0.157402	0.298375	0.0987689	0.198962	0.251128	0.147082	0.132692	249391892	19.82	90348	NA	8760	NA	37751612	3	1592	NA	25153224	1.99	216792	0.01	2868	NA	178744940	14.21	7421756	0.59
Aves	Chaetorhynchus_papuensis	254446	Chordata	Aves	Passeriformes	Rhipiduridae	GCA_013396525.1	0.9	1.27077e+09	NA	NA	37.5	CRC_AvianBodyMasses	NA	3.62434	606	0.0191348	0.127952	0.149547	798	0.0196724	0.133887	0.146933	0.288457	0.119351	0.178146	0.232943	0.207908	0.136103	158981440	12.59	428488	0.03	1432	NA	21030352	1.66	2516	NA	31378400	2.48	275216	0.02	1396	NA	99449692	7.88	6413948	0.5
Aves	Lanius_collurio	56324	Chordata	Aves	Passeriformes	Laniidae	GCA_020086605.1	6.3	1183380000	10.1	AnAge	28.45	CRC_AvianBodyMasses	2.31254	3.34815	501	0.00720496	0.0420622	0.171293	NA	NA	NA	NA	0.0657239	0.181482	0.21924	0.0673624	0.294113	0.115473	125736428	10.69	41240	NA	632	NA	24518788	2.08	4016	NA	21226968	1.8	162164	0.01	328	NA	75525260	6.42	4257032	0.36
Aves	Lanius_ludovicianus	28713	Chordata	Aves	Passeriformes	Laniidae	GCA_013397235.1	0.4	1.26503e+09	12.5	AnAge	47.7	CRC_AvianBodyMasses	2.52573	3.86493	570	0.0100535	0.0548928	0.183148	NA	NA	NA	NA	0.0657239	0.162764	0.222344	0.0673624	0.295294	0.112052	173958376	13.84	100396	NA	4052	NA	27304672	2.17	6540	NA	27194064	2.16	253452	0.02	17172	NA	112260992	8.93	6817036	0.54
Aves	Cicinnurus_regius	36263	Chordata	Aves	Passeriformes	Paradisaeidae	GCA_003713305.1	0.8	1.28822e+09	NA	NA	51	CRC_AvianBodyMasses	NA	3.93183	442	0.00335321	0.0207587	0.161533	NA	NA	NA	NA	0.0423217	0.0976059	0.197805	0.0573416	0.128658	0.10955	142649852	11.14	96444	NA	7404	NA	25536380	1.99	9760	NA	27916764	2.18	282876	0.02	2008	NA	84768388	6.62	4029828	0.31
Aves	Diphyllodes_magnificus	28716	Chordata	Aves	Passeriformes	Paradisaeidae	GCA_003713285.1	1	1.29601e+09	NA	NA	NA	NA	NA	NA	468	0.00447046	0.0232432	0.192334	NA	NA	NA	NA	0.0423217	0.0890382	0.200066	0.0573416	0.146067	0.113843	130169952	10.11	103520	NA	2920	NA	23037856	1.78	10564	NA	25801804	2	288076	0.02	3812	NA	76556216	5.94	4365184	0.33
Aves	Paradisaea_raggiana	36268	Chordata	Aves	Passeriformes	Paradisaeidae	GCA_003713265.1	0.7	1.26155e+09	NA	NA	220.5	CRC_AvianBodyMasses	NA	5.3959	421	0.00343758	0.0199167	0.172598	NA	NA	NA	NA	0.0338675	0.0690504	0.197585	0.0436624	0.149063	0.114786	152245352	12.14	92680	NA	14708	NA	24806316	1.97	5280	NA	30679708	2.44	298364	0.02	2352	NA	89722372	7.15	6623572	0.52
Aves	Paradisaea_rubra	39963	Chordata	Aves	Passeriformes	Paradisaeidae	GCA_003713215.1	0.7	1.30241e+09	NA	NA	179.5	CRC_AvianBodyMasses	NA	5.19018	392	0.00320021	0.0182548	0.175308	NA	NA	NA	NA	0.0338675	0.0604386	0.198823	0.0436624	0.113171	0.113136	136839400	10.57	110976	NA	3528	NA	23224512	1.79	1656	NA	29425452	2.27	245104	0.01	376	NA	79577260	6.15	4250536	0.32
Aves	Parotia_lawesii	39961	Chordata	Aves	Passeriformes	Paradisaeidae	GCA_003713295.1	0.9	1.28505e+09	NA	NA	155.5	CRC_AvianBodyMasses	NA	5.04665	542	0.00593528	0.0346839	0.171125	NA	NA	NA	NA	0.149154	0.0720818	0.19995	0.113046	0.112494	0.11697	129955440	10.18	91272	NA	5912	NA	25289692	1.98	3816	NA	27450824	2.15	274036	0.02	484	NA	71463812	5.6	5375592	0.42
Aves	Ifrita_kowaldi	461245	Chordata	Aves	Passeriformes	Cinclosomatidae	GCA_013398055.1	0.4	1.26638e+09	NA	NA	32.1	CRC_AvianBodyMasses	NA	3.46886	599	0.0165337	0.107558	0.153719	792	0.0177186	0.114518	0.154723	0.291585	0.115461	0.187749	0.24701	0.165565	0.120519	141681524	11.27	95428	NA	4936	NA	22665792	1.8	7476	NA	25901424	2.06	262944	0.02	700	NA	88612168	7.05	4130656	0.32
Aves	Falcunculus_frontatus	254539	Chordata	Aves	Passeriformes	NA	GCA_013398115.1	0.5	1.26782e+09	NA	NA	28.05	CRC_AvianBodyMasses	NA	3.33399	606	0.0194049	0.138054	0.140561	803	0.0200442	0.138099	0.145144	0.374225	0.103141	0.203423	0.318605	0.169526	0.115713	132001432	10.48	109560	NA	18452	NA	16416816	1.3	1604	NA	25896232	2.05	295476	0.02	2252	NA	80616884	6.4	8644156	0.68
Aves	Gymnorhina_tibicen	9132	Chordata	Aves	Passeriformes	Artamidae	GCA_013399875.1	0.7	1.27941e+09	NA	NA	256	CRC_AvianBodyMasses	NA	5.54518	602	0.0167086	0.103615	0.161256	797	0.0163796	0.104937	0.15609	0.299897	0.099348	0.216541	0.241901	0.159081	0.122325	171682820	13.51	82860	NA	7184	NA	29349948	2.31	1512	NA	30298420	2.38	271068	0.02	NA	NA	109709336	8.63	1962492	0.15
Aves	Rhagologus_leucostigma	156170	Chordata	Aves	Passeriformes	NA	GCA_013397725.1	0.7	1.27086e+09	NA	NA	26.8	CRC_AvianBodyMasses	NA	3.2884	598	0.0150248	0.0932588	0.161108	794	0.0153272	0.0951173	0.16114	0.299897	0.0967911	0.192106	0.241901	0.13835	0.138573	142124276	11.26	97148	NA	9308	NA	20920516	1.65	6876	NA	29027884	2.3	292032	0.02	1068	NA	79262276	6.28	12507168	0.99
Aves	Machaerirhynchus_nigripectus	1160894	Chordata	Aves	Passeriformes	Dicruridae	GCA_013397975.1	0.5	1.27006e+09	NA	NA	12	CRC_AvianBodyMasses	NA	2.48491	607	0.017604	0.114237	0.1541	795	0.0173979	0.116187	0.149741	0.315629	0.114254	0.194956	0.255208	0.154741	0.138483	138259020	10.96	138352	0.01	14052	NA	23928104	1.89	3400	NA	28656620	2.27	272032	0.02	NA	NA	77328104	6.13	7918356	0.62
Aves	Platysteira_castanea	1160851	Chordata	Aves	Passeriformes	NA	GCA_013397175.1	0.5	1.28743e+09	NA	NA	14.1	CRC_AvianBodyMasses	NA	2.64617	603	0.0210386	0.135148	0.155671	801	0.0200938	0.135226	0.148595	0.322586	0.118444	0.204677	0.277864	0.166239	0.14912	204490988	16	58588	NA	688	NA	32869476	2.57	2216	NA	26824340	2.09	229516	0.01	460	NA	137655304	10.77	6850400	0.53
Aves	Vireo_altiloquus	34956	Chordata	Aves	Passeriformes	Vireonidae	GCA_013396875.1	0.9	1.2948e+09	NA	NA	17.9	CRC_AvianBodyMasses	NA	2.8848	616	0.0277875	0.203055	0.136847	807	0.0280502	0.20297	0.138199	0.385869	0.138532	0.203696	0.318652	0.246981	0.107552	200541188	15.6	120804	NA	3960	NA	39126520	3.04	115032	NA	26635660	2.07	303696	0.02	NA	NA	121219264	9.43	13016252	1.01
Aves	Ptilorrhoa_leucosticta	449384	Chordata	Aves	Passeriformes	Cinclosomatidae	GCA_013396485.1	0.5	1.34997e+09	NA	NA	49.2	CRC_AvianBodyMasses	NA	3.89589	594	0.0209331	0.131984	0.158604	773	0.0206458	0.131898	0.156528	0.423969	0.102717	0.22962	0.373834	0.119122	0.119589	209916120	15.65	188576	0.01	8424	NA	32873192	2.45	19452	NA	35285176	2.63	306168	0.02	51764	NA	123879928	9.24	17303440	1.29
Aves	Orthonyx_spaldingii	38397	Chordata	Aves	Passeriformes	Orthonychidae	GCA_013397795.1	0.2	1.25811e+09	NA	NA	161	CRC_AvianBodyMasses	NA	5.0814	619	0.0300749	0.224804	0.133782	821	0.0306658	0.228663	0.134109	0.490602	0.106802	0.197527	0.440107	0.198059	0.100012	201588100	16.13	95196	NA	12860	NA	30189356	2.41	5324	NA	27208360	2.17	256732	0.02	4372	NA	136487140	10.92	7328760	0.58
Aves	Dasyornis_broadbenti	243059	Chordata	Aves	Passeriformes	Dasyornithidae	GCA_013397935.1	0.5	1.24617e+09	NA	NA	67.9	CRC_AvianBodyMasses	NA	4.21804	622	0.0251645	0.179708	0.14003	818	0.0245592	0.177957	0.138006	0.4347	0.110862	0.197261	0.367186	0.224358	0.112198	164359196	13.28	95944	NA	2812	NA	1187368	0.09	2536	NA	4206484	0.34	124892	0.01	596	NA	158369788	12.8	368776	0.02
Aves	Grantiella_picta	266360	Chordata	Aves	Passeriformes	Meliphagidae	GCA_013397955.1	0.7	1.23373e+09	NA	NA	21.5	CRC_AvianBodyMasses	NA	3.06805	599	0.0135924	0.0839055	0.161997	NA	NA	NA	NA	0.188701	0.141521	0.177695	0.126052	0.270342	0.105401	243158000	19.86	57740	NA	21336	NA	11531596	0.94	1060	NA	18916092	1.54	176348	0.01	NA	NA	211079448	17.24	1374380	0.11
Aves	Lichenostomus_cassidix	1497555	Chordata	Aves	Passeriformes	Meliphagidae	GCA_008360975.1	3.2	1.33998e+09	NA	NA	NA	NA	NA	NA	614	0.0146668	0.103768	0.141343	NA	NA	NA	NA	0.188701	0.128592	0.182433	0.126052	0.275088	0.107547	NA	NA	NA	NA	NA	NA	NA	NA	NA	NA	NA	NA	NA	NA	NA	NA	NA	NA	NA	NA
Aves	Origma_solitaria	720586	Chordata	Aves	Passeriformes	Acanthizidae	GCA_013397895.1	0.2	1.25659e+09	NA	NA	14.35	CRC_AvianBodyMasses	NA	2.66375	620	0.0239184	0.167566	0.14274	821	0.0222617	0.16036	0.138823	0.380193	0.116758	0.190692	0.309626	0.211737	0.105856	227875976	18.27	103740	NA	14756	NA	49416856	3.96	3460	NA	22190064	1.77	222196	0.01	776	NA	151114640	12.11	4809488	0.38
Aves	Pardalotus_punctatus	254575	Chordata	Aves	Passeriformes	Pardalotidae	GCA_013400915.1	0.3	1.25542e+09	NA	NA	8.7	CRC_AvianBodyMasses	NA	2.16332	582	0.0249152	0.165585	0.150468	772	0.022097	0.149434	0.147872	0.406287	0.115338	0.202354	0.338964	0.208454	0.11467	192322872	15.43	169360	0.01	127804	0.01	24360576	1.95	62912	NA	23683192	1.9	224444	0.01	NA	NA	141597820	11.36	2096764	0.16
Aves	Malurus_cyaneus_samueli	2593467	Chordata	Aves	Passeriformes	Maluridae	GCA_009741485.1	0.7	1.31164e+09	10.4	AnAge	10.4	AnAge	2.34181	2.34181	595	0.0107987	0.0752021	0.143595	NA	NA	NA	NA	0.131377	0.122219	0.206882	0.122892	0.253346	0.0941872	226653712	17.45	34428	NA	2104	NA	14269144	1.09	2396	NA	15481804	1.19	73120	NA	896	NA	193465820	14.89	3324000	0.25
Aves	Malurus_elegans	720584	Chordata	Aves	Passeriformes	Maluridae	GCA_013397995.1	0.1	1.23262e+09	NA	NA	9.6	CRC_AvianBodyMasses	NA	2.26176	592	0.00912234	0.062196	0.146671	NA	NA	NA	NA	0.131377	0.13618	0.208391	0.122892	0.201814	0.0932153	206717136	16.88	99872	NA	10400	NA	19263788	1.57	10596	NA	18605048	1.51	159000	0.01	NA	NA	164066672	13.39	4501760	0.36
Aves	Climacteris_rufus	47695	Chordata	Aves	Passeriformes	Climacteridae	GCA_013398175.1	0.6	1.28753e+09	NA	NA	NA	NA	NA	NA	609	0.0356432	0.267961	0.133016	803	0.0349898	0.267784	0.130664	0.522362	0.126896	0.167321	0.462133	0.168876	0.112797	208781288	16.33	99224	NA	17036	NA	16168716	1.26	3884	NA	26518432	2.07	237004	0.01	NA	NA	144591268	11.31	21145724	1.65
Aves	Ptilonorhynchus_violaceus	28724	Chordata	Aves	Passeriformes	Ptilonorhynchidae	GCA_013397565.1	0.5	1.28617e+09	NA	NA	219	CRC_AvianBodyMasses	NA	5.38907	603	0.0224323	0.178379	0.125756	803	0.0223865	0.177871	0.125859	0.522362	0.0955145	0.162462	0.462133	0.162812	0.111719	204890308	16.04	117084	NA	1316	NA	22586612	1.76	28380	NA	29385808	2.3	286176	0.02	NA	NA	111216956	8.71	41267976	3.23
Aves	Atrichornis_clamosus	449594	Chordata	Aves	Passeriformes	Menuridae	GCA_013400975.1	0.1	1.27365e+09	NA	NA	43.05	CRC_AvianBodyMasses	NA	3.76236	612	0.0242174	0.172863	0.140096	816	0.023459	0.174249	0.134629	0.514327	0.0949355	0.179867	0.449191	0.159735	0.10225	286803216	22.67	51976	NA	4484	NA	27049592	2.13	80676	NA	36603944	2.89	268616	0.02	2252	NA	215717964	17.05	7023712	0.55
Aves	Menura_novaehollandiae	47692	Chordata	Aves	Passeriformes	Menuridae	GCA_013396355.1	0.5	1.28936e+09	NA	NA	980	CRC_AvianBodyMasses	NA	6.88755	614	0.0197326	0.13456	0.146645	818	0.0195552	0.137304	0.142423	0.514327	0.0713413	0.180754	0.449191	0.111487	0.133751	259749044	20.28	51612	NA	4692	NA	26097948	2.03	19228	NA	39210988	3.06	272440	0.02	2496	NA	143017564	11.16	51072076	3.98
Aves	Campylorhamphus_procurvoides	190295	Chordata	Aves	Passeriformes	Dendrocolaptidae	GCA_013396655.1	0.5	1.27365e+09	NA	NA	33.5	CRC_AvianBodyMasses	NA	3.51155	589	0.0112874	0.0836579	0.134923	NA	NA	NA	NA	0.117844	0.133036	0.171198	0.0914108	0.306946	0.0974067	159343776	12.6	158744	0.01	3228	NA	12422200	0.98	2008	NA	30522124	2.41	308928	0.02	NA	NA	113929760	9.01	1996784	0.15
Aves	Xiphorhynchus_elegans	269412	Chordata	Aves	Passeriformes	Dendrocolaptidae	GCA_013401175.1	0.6	1.28836e+09	NA	NA	34.1	CRC_AvianBodyMasses	NA	3.5293	514	0.00912385	0.0653479	0.13962	NA	NA	NA	NA	0.117844	0.13426	0.163319	0.0914108	0.315323	0.10696	153817100	12.01	95884	NA	11356	NA	10740364	0.83	36704	NA	27383708	2.13	300124	0.02	2368	NA	111363524	8.7	3883068	0.3
Aves	Sclerurus_mexicanus	265632	Chordata	Aves	Passeriformes	Furnariidae	GCA_013396755.1	0.3	1242060000	NA	NA	25.1	CRC_AvianBodyMasses	NA	3.22287	602	0.0177983	0.126143	0.141096	803	0.0260276	0.192658	0.135097	0.294559	0.11063	0.17617	0.216606	0.242122	0.0996389	171382644	13.9	87636	NA	6392	NA	11785908	0.95	3684	NA	30998904	2.51	350360	0.02	NA	NA	122966488	9.97	5183272	0.42
Aves	Scytalopus_superciliaris	312124	Chordata	Aves	Passeriformes	Rhinocryptidae	GCA_013400415.1	0.3	1.29093e+09	NA	NA	17.8	CRC_AvianBodyMasses	NA	2.8792	596	0.0281578	0.221441	0.127157	785	0.0278013	0.220808	0.125907	0.433558	0.128677	0.151694	0.314086	0.262469	0.107005	171866552	13.41	99088	NA	130876	0.01	12755960	0.99	6184	NA	40150648	3.13	439656	0.03	2984	NA	115638264	9.02	2642892	0.2
Aves	Grallaria_varia	117165	Chordata	Aves	Passeriformes	Formicariidae	GCA_013396735.1	0.4	1.28398e+09	NA	NA	119	CRC_AvianBodyMasses	NA	4.77912	596	0.0321267	0.227149	0.141435	794	0.0317044	0.229027	0.138431	0.456745	0.125666	0.173597	0.356899	0.249905	0.114193	286139768	22.45	103912	NA	6188	NA	42365608	3.32	53080	NA	48772408	3.82	317660	0.02	3760	NA	184800460	14.49	9716692	0.76
Aves	Formicarius_rufipectus	1118560	Chordata	Aves	Passeriformes	Formicariidae	GCA_013399695.1	0.3	1.26974e+09	NA	NA	74.4	CRC_AvianBodyMasses	NA	4.30946	614	0.0372698	0.275508	0.135277	809	0.0366651	0.275386	0.133141	0.470556	0.141451	0.182441	0.376882	0.258418	0.106127	280764288	22.27	62836	NA	6964	NA	18921388	1.5	4656	NA	38951716	3.09	328328	0.02	7408	NA	219695256	17.43	2785736	0.22
Aves	Sakesphorus_luctuosus	419690	Chordata	Aves	Passeriformes	Thamnophilidae	GCA_013396695.1	0.5	1.31317e+09	NA	NA	31.4	CRC_AvianBodyMasses	NA	3.44681	592	0.0368559	0.281183	0.131074	776	0.0372464	0.282434	0.131876	0.508736	0.150656	0.186535	0.413303	0.244498	0.0931611	316335968	24.27	110428	NA	3936	NA	15530560	1.19	5924	NA	49007184	3.75	1514712	0.11	NA	NA	245424256	18.82	4738968	0.36
Aves	Corapipo_altera	415028	Chordata	Aves	Passeriformes	Pipridae	GCA_003945725.1	1.3	1.33204e+09	NA	NA	11.8	CRC_AvianBodyMasses	NA	2.4681	608	0.0117827	0.0883991	0.13329	784	0.0110476	0.0764573	0.144494	0.146375	0.170215	0.193918	0.120004	0.250832	0.101008	NA	NA	NA	NA	NA	NA	NA	NA	NA	NA	NA	NA	NA	NA	NA	NA	NA	NA	NA	NA
Aves	Neopelma_chrysocephalum	114329	Chordata	Aves	Passeriformes	Pipridae	GCA_003984885.2	91.1	1.38899e+09	NA	NA	15.5	CRC_AvianBodyMasses	NA	2.74084	3	0.0130936	0.140526	0.0931756	NA	NA	NA	NA	NA	NA	NA	NA	NA	NA	NA	NA	NA	NA	NA	NA	NA	NA	NA	NA	NA	NA	NA	NA	NA	NA	NA	NA	NA	NA
Aves	Pipra_filicauda	649802	Chordata	Aves	Passeriformes	Pipridae	GCA_003945595.2	0.5	1.31534e+09	NA	NA	15.4	CRC_AvianBodyMasses	NA	2.73437	576	0.0071044	0.0432044	0.164437	NA	NA	NA	NA	0.146375	0.080988	0.20443	0.120004	0.144721	0.102886	124874556	9.56	237112	0.01	9004	NA	9328936	0.71	82340	NA	36010004	2.75	387000	0.02	NA	NA	76284848	5.84	2535312	0.19
Aves	Lepidothrix_coronata	321398	Chordata	Aves	Passeriformes	Pipridae	GCA_001604755.1	0.3	1163820000	NA	NA	NA	NA	NA	NA	572	0.00729188	0.0473943	0.153856	NA	NA	NA	NA	0.151923	0.104623	0.205994	0.126081	0.145898	0.107562	104706460	9.08	280252	0.02	2820	NA	8858964	0.76	88768	NA	35983732	3.12	248448	0.02	400	NA	56665628	4.91	2577448	0.22
Aves	Manacus_vitellinus	328815	Chordata	Aves	Passeriformes	Pipridae	GCA_001715985.3	0.1	1.3037e+09	NA	NA	18.2	CRC_AvianBodyMasses	NA	2.90142	558	0.00922547	0.0549412	0.167915	744	0.0118945	0.0765946	0.155292	0.165639	0.0880815	0.200737	0.138722	0.181008	0.136459	67662692	5.24	111232	NA	13344	NA	6318488	0.48	12896	NA	23213352	1.8	202084	0.01	NA	NA	35921708	2.78	1869588	0.14
Aves	Piprites_chloris	114369	Chordata	Aves	Passeriformes	Pipridae	GCA_013399295.1	0.3	1193160000	NA	NA	16	CRC_AvianBodyMasses	NA	2.77259	610	0.0215095	0.155443	0.138375	812	0.0218489	0.158232	0.138082	0.377026	0.117982	0.184507	0.303116	0.197887	0.109711	144274312	12.17	63556	NA	NA	NA	10498932	0.88	4616	NA	36957596	3.11	338600	0.02	236	NA	93378388	7.88	3032388	0.25
Aves	Onychorhynchus_coronatus	360224	Chordata	Aves	Passeriformes	Tyrannidae	GCA_013397825.1	0.2	1114920000	NA	NA	14	CRC_AvianBodyMasses	NA	2.63906	619	0.0213983	0.157291	0.136043	819	0.0218902	0.161527	0.13552	0.36395	0.127412	0.183305	0.289002	0.23144	0.0911997	158864292	14.35	36600	NA	3712	NA	17425496	1.57	11488	NA	42431264	3.83	401940	0.03	NA	NA	94381124	8.52	4172668	0.37
Aves	Pachyramphus_minor	369605	Chordata	Aves	Passeriformes	Tyrannidae	GCA_013397135.1	0.3	1.2826e+09	NA	NA	36.6	CRC_AvianBodyMasses	NA	3.60005	613	0.0202009	0.149561	0.135068	805	0.020112	0.150147	0.133948	0.36395	0.113318	0.180186	0.289002	0.208697	0.0911902	205567604	16.14	88664	NA	560	NA	13246616	1.04	1804	NA	36723896	2.88	329392	0.02	NA	NA	151673676	11.91	3502996	0.27
Aves	Mionectes_macconnelli	254557	Chordata	Aves	Passeriformes	Tyrannidae	GCA_013397495.1	0.3	1183380000	NA	NA	13.5	CRC_AvianBodyMasses	NA	2.60269	611	0.0222874	0.155993	0.142874	805	0.0221206	0.157191	0.140724	0.332306	0.141818	0.167628	0.241694	0.232592	0.110139	186532016	15.87	77408	NA	7584	NA	19521444	1.66	19968	NA	46892952	3.99	595220	0.05	364312	0.03	114801244	9.76	4251884	0.36
Aves	Tyrannus_savana	137541	Chordata	Aves	Passeriformes	Tyrannidae	GCA_013399735.1	0.4	1.28333e+09	NA	NA	31.9	CRC_AvianBodyMasses	NA	3.46261	600	0.020445	0.164169	0.124536	792	0.0206571	0.166396	0.124145	0.332306	0.134413	0.166795	0.241694	0.206476	0.115786	168521500	13.23	105792	NA	4160	NA	11245616	0.88	3224	NA	35750460	2.8	319848	0.02	4968	NA	117726656	9.24	3360776	0.26
Aves	Tachuris_rubrigastra	495162	Chordata	Aves	Passeriformes	Tyrannidae	GCA_013396555.1	0.4	1.28839e+09	NA	NA	7.8	CRC_AvianBodyMasses	NA	2.05412	606	0.022372	0.153936	0.145333	811	0.0222376	0.156787	0.141833	0.357754	0.12417	0.183696	0.279434	0.213698	0.0985349	254740736	19.9	83756	NA	10484	NA	20922276	1.63	8340	NA	42127184	3.29	343468	0.02	1120	NA	186496520	14.57	4747588	0.37
Aves	Oxyruncus_cristatus	114331	Chordata	Aves	Passeriformes	Cotingidae	GCA_013399855.1	0.2	1.29176e+09	NA	NA	42	CRC_AvianBodyMasses	NA	3.73767	613	0.0194158	0.135236	0.14357	808	0.0191766	0.13736	0.139608	0.424661	0.0975882	0.186656	0.356985	0.146188	0.115788	177090528	13.81	91476	NA	3588	NA	12592688	0.98	3796	NA	40083432	3.12	344996	0.02	NA	NA	121557828	9.47	2412724	0.18
Aves	Sapayoa_aenigma	239371	Chordata	Aves	Passeriformes	Tyrannidae	GCA_013398745.1	0.4	1.23541e+09	NA	NA	20.8	CRC_AvianBodyMasses	NA	3.03495	600	0.0296893	0.230997	0.128527	792	0.0291852	0.230244	0.126758	0.496781	0.134855	0.179167	0.413716	0.19255	0.0955774	231809960	18.89	2635836	0.21	4652	NA	33137576	2.7	20916	NA	44967500	3.66	285132	0.02	NA	NA	139722840	11.38	11035508	0.89
Aves	Smithornis_capensis	363769	Chordata	Aves	Passeriformes	Eurylaimidae	GCA_013396465.1	0.4	1.29037e+09	NA	NA	23.2	CRC_AvianBodyMasses	NA	3.14415	597	0.0317644	0.21722	0.146232	783	0.0320069	0.221224	0.144681	0.496781	0.116155	0.18007	0.413716	0.217324	0.124594	280542672	21.89	63212	NA	4260	NA	14962556	1.16	6836	NA	51118212	3.98	372368	0.02	1980	NA	208581532	16.27	5431716	0.42
Aves	Serilophus_lunatus	239386	Chordata	Aves	Passeriformes	Eurylaimidae	GCA_013399895.1	0.4	1.26502e+09	NA	NA	34	CRC_AvianBodyMasses	NA	3.52636	606	0.0361752	0.281211	0.128641	793	0.0360029	0.283556	0.126969	0.529032	0.136592	0.176574	0.458062	0.207457	0.106779	225609400	17.96	632912	0.05	50372	NA	12732880	1.01	14276	NA	35876084	2.85	277164	0.02	NA	NA	174885320	13.92	1140392	0.09
Aves	Urocolius_indicus	458196	Chordata	Aves	Coliiformes	Coliidae	GCA_013401255.1	0.3	1496340000	NA	NA	52.7	CRC_AvianBodyMasses	NA	3.96462	592	0.0674099	0.516197	0.130589	782	0.067249	0.523867	0.12837	0.755705	0.17879	0.1862	0.644293	0.358252	0.112604	354735060	23.87	680180	0.04	1720	NA	33080336	2.22	47052	NA	68030860	4.57	463744	0.03	NA	NA	251320024	16.91	1111144	0.07
Aves	Bucco_capensis	135168	Chordata	Aves	Galbuliformes	Bucconidae	GCA_013396975.1	0.5	1.20178e+09	NA	NA	54	CRC_AvianBodyMasses	NA	3.98898	599	0.053	0.359063	0.147606	797	0.0524896	0.367949	0.142655	0.599346	0.153015	0.208809	0.496952	0.262993	0.107121	269761328	22.61	178912	0.01	8396	NA	20261860	1.69	23644	NA	104695024	8.77	255592	0.02	822024	0.06	141606516	11.86	1909360	0.16
Aves	Galbula_dea	1109041	Chordata	Aves	Galbuliformes	Galbulidae	GCA_013399015.1	0.4	1.22424e+09	NA	NA	27.4	CRC_AvianBodyMasses	NA	3.31054	617	0.0433889	0.326362	0.132947	840	0.0434546	0.34096	0.127448	0.599346	0.138917	0.165872	0.496952	0.257043	0.0918889	187925528	15.46	211912	0.01	2412	NA	8971384	0.73	1544	NA	77089692	6.34	163184	0.01	NA	NA	100438652	8.26	1046748	0.08
Aves	Colaptes_auratus	51355	Chordata	Aves	Piciformes	Picidae	GCA_015227895.1	5.7	1.67389e+09	12.5	AnAge	142	CRC_AvianBodyMasses	2.52573	4.95583	552	0.0142701	0.0976762	0.146096	722	0.0146921	0.102481	0.143364	0.150487	0.200784	0.167883	0.127577	0.276606	0.0999842	335134336	20.15	78204	NA	2272	NA	9729376	0.58	128900	NA	183296544	11.02	93200	NA	6132	NA	137260660	8.25	4539048	0.27
Aves	Melanerpes_aurifrons	371916	Chordata	Aves	Piciformes	Picidae	GCA_011125475.1	2	1.59091e+09	NA	NA	80.9	CRC_AvianBodyMasses	NA	4.39321	615	0.0227211	0.171646	0.132372	835	0.0249696	0.196748	0.126912	0.150487	0.286258	0.153039	0.127577	0.410651	0.106042	424246044	26.85	115552	NA	4672	NA	17936896	1.13	68956	NA	200903232	12.71	189984	0.01	1892	NA	202603620	12.82	2421240	0.15
Aves	Indicator_maculatus	545262	Chordata	Aves	Piciformes	Indicatoridae	GCA_013399975.1	0.3	1.37053e+09	NA	NA	46.8	CRC_AvianBodyMasses	NA	3.84588	597	0.0246954	0.167527	0.147411	791	0.0253404	0.172645	0.146778	0.298197	0.165396	0.184537	0.283191	0.251993	0.100103	492996144	36.21	159868	0.01	10844	NA	10663644	0.78	2144	NA	123238296	9.05	64468	NA	824	NA	356992284	26.22	1863772	0.13
Aves	Tricholaema_leucomelas	240729	Chordata	Aves	Piciformes	Lybiidae	GCA_013400475.1	0.4	1545240000	NA	NA	32.2	CRC_AvianBodyMasses	NA	3.47197	610	0.0392055	0.291895	0.134314	807	0.0390157	0.297911	0.130965	0.407459	0.212702	0.168243	0.394939	0.282595	0.0908108	534722896	34.84	594284	0.03	4116368	0.26	19498740	1.27	28408	NA	254786128	16.6	734016	0.04	5932	NA	251403036	16.38	3555984	0.23
Aves	Alopecoenas_beccarii	262131	Chordata	Aves	Columbiformes	Columbidae	GCA_013399365.1	0	1.35608e+09	NA	NA	NA	NA	NA	NA	605	0.0180376	0.131455	0.137215	819	0.0211474	0.15527	0.136198	0.365456	0.0837915	0.188485	0.313261	0.182181	0.0993821	342268848	25.41	1135192	0.08	1216	NA	9632028	0.71	13104	NA	37100896	2.75	115964	NA	604	NA	292273764	21.7	1996080	0.14
Aves	Caloenas_nicobarica	187106	Chordata	Aves	Columbiformes	Columbidae	GCA_013398195.1	0.1	1506120000	20.5	AnAge	540	CRC_AvianBodyMasses	3.02042	6.29157	572	0.0158054	0.111082	0.142286	776	0.017316	0.119508	0.144895	0.365456	0.0769272	0.19901	0.313261	0.174555	0.0918489	171503540	11.46	1934784	0.12	80584	NA	11003996	0.73	8296	NA	49227656	3.29	144216	NA	1788	NA	105084548	7.02	4017672	0.26
Aves	Columba_janthina_nitens	985682	Chordata	Aves	Columbiformes	Columbidae	GCA_014362705.1	0.6	1.31738e+09	NA	NA	397	CRC_AvianBodyMasses	NA	5.98394	571	0.0102827	0.0715336	0.143747	NA	NA	NA	NA	0.200045	0.0917127	0.189585	0.186912	0.163442	0.123989	244293912	18.67	1144896	0.08	33116	NA	8756348	0.66	18312	NA	48189880	3.68	73688	NA	NA	NA	178988368	13.68	7089304	0.54
Aves	Streptopelia_turtur	177155	Chordata	Aves	Columbiformes	Columbidae	GCA_901699155.2	0.5	1202940000	13.2	AnAge	132	CRC_AvianBodyMasses	2.58022	4.8828	583	0.0104406	0.0721065	0.144793	NA	NA	NA	NA	0.200045	0.0786563	0.189889	0.186912	0.132364	0.114204	263149108	22.02	936316	0.07	NA	NA	6940624	0.58	13488	NA	33452288	2.8	1294780	0.1	1452	NA	218541900	18.29	1968260	0.16
Aves	Trogon_melanurus	56311	Chordata	Aves	Trogoniformes	Trogonidae	GCA_013399275.1	0.6	1.3467e+09	NA	NA	114	CRC_AvianBodyMasses	NA	4.7362	591	0.0516898	0.419036	0.123354	791	0.0512671	0.425736	0.12042	0.750089	0.154957	0.181085	0.683912	0.237541	0.0958678	249825228	18.67	592980	0.04	10236	NA	17042312	1.27	31596	NA	68660188	5.13	415224	0.03	NA	NA	161549032	12.07	1523660	0.11
Aves	Calypte_anna	9244	Chordata	Aves	Apodiformes	Trochilidae	GCA_003957555.2	0.5	1114920000	8.5	AnAge	4.25	CRC_AvianBodyMasses	2.14007	1.44692	602	0.0581162	0.441343	0.13168	792	0.0570587	0.446143	0.127893	0.627605	0.166321	0.186644	0.551393	0.373797	0.0859939	104507740	9.44	135296	0.01	2200	NA	6472460	0.58	1588	NA	39256348	3.54	155340	0.01	NA	NA	57231080	5.17	1253428	0.11
Aves	Hemiprocne_comata	243314	Chordata	Aves	Apodiformes	Apodidae	GCA_013396855.1	0.2	1.38705e+09	NA	NA	18.2	CRC_AvianBodyMasses	NA	2.90142	591	0.0391159	0.291174	0.134339	783	0.0394392	0.295371	0.133524	0.627605	0.116167	0.192948	0.551393	0.221848	0.102092	230548120	16.74	100432	NA	1048	NA	9982008	0.72	59240	NA	68628376	4.98	73232	NA	NA	NA	150569184	10.93	1134600	0.08
Aves	Centropus_unirufus	1118519	Chordata	Aves	Cuculiformes	Centropidae	GCA_013397695.1	0.4	1.27527e+09	NA	NA	184.5	CRC_AvianBodyMasses	NA	5.21765	595	0.0562299	0.44362	0.126753	791	0.0555995	0.449803	0.123609	0.560902	0.213603	0.169236	0.514905	0.273259	0.125869	NA	NA	NA	NA	NA	NA	NA	NA	NA	NA	NA	NA	NA	NA	NA	NA	NA	NA	NA	NA
Aves	Crotophaga_sulcirostris	33598	Chordata	Aves	Cuculiformes	Crotophagidae	GCA_013397455.1	0.5	1300740000	NA	NA	82.2	CRC_AvianBodyMasses	NA	4.40916	601	0.0384467	0.261931	0.146782	790	0.0393711	0.269314	0.146191	0.560902	0.124707	0.181411	0.514905	0.213186	0.105937	177046796	13.7	1276084	0.09	6520	NA	4729968	0.36	488448	0.03	77157688	5.97	316916	0.02	1724	NA	92237932	7.14	831516	0.06
Aves	Oceanodroma_tethys	79633	Chordata	Aves	Procellariiformes	NA	GCA_013397025.1	0.3	1.44492e+09	NA	NA	22.6	CRC_AvianBodyMasses	NA	3.11795	590	0.0287319	0.177571	0.161805	783	0.0296346	0.186338	0.159037	0.819924	0.0587519	0.208604	0.80089	0.101636	0.110909	220304964	15.34	274316	0.01	8356	NA	32604376	2.27	24484	NA	36678856	2.55	154500	0.01	NA	NA	142861068	9.95	7699008	0.53
Aves	Amazona_guildingii	175529	Chordata	Aves	Psittaciformes	Psittacidae	GCA_013399615.1	0.7	1.37782e+09	28	AnAge	646	CRC_AvianBodyMasses	3.3322	6.4708	599	0.0153286	0.0979943	0.156423	800	0.0161508	0.102264	0.157931	0.319565	0.0867612	0.198797	0.265846	0.129269	0.124513	183306740	13.4	210696	0.01	NA	NA	14302028	1.04	17792	NA	40860940	2.98	79964	NA	992	NA	126239116	9.23	1595212	0.11
Aves	Myiopsitta_monachus	176066	Chordata	Aves	Psittaciformes	Psittacidae	GCA_017639245.1	0.6	1.4202e+09	22.1	AnAge	120	CRC_AvianBodyMasses	3.09558	4.78749	625	0.0174316	0.106923	0.16303	848	0.0182984	0.119867	0.152656	0.319565	0.0939757	0.197401	0.265846	0.141579	0.125266	224971064	15.95	159012	0.01	1564	NA	16887444	1.19	12048	NA	36321092	2.57	215856	0.01	332	NA	167559720	11.88	3813996	0.27
Aves	Ara_ararauna	9226	Chordata	Aves	Psittaciformes	Psittacidae	GCA_010014805.1	1	1418100000	43	AnAge	1125	CRC_AvianBodyMasses	3.7612	7.02554	128	0.00735539	0.0176414	0.416939	NA	NA	NA	NA	0.0465534	0.0350542	0.237238	0.0390023	0.0464728	0.171896	262049980	18.61	402432	0.02	6004	NA	16341748	1.16	62084	NA	38253692	2.71	180744	0.01	772	NA	204080172	14.49	2722332	0.19
Aves	Ara_glaucogularis	303304	Chordata	Aves	Psittaciformes	Psittacidae	GCA_013433245.1	0.3	1.38524e+09	22	AnAge	784	CRC_AvianBodyMasses	3.09104	6.66441	266	0.00880186	0.0387669	0.227046	NA	NA	NA	NA	0.0465534	0.0315216	0.225226	0.0390023	0.0693896	0.177664	214188300	15.56	129820	NA	4896	NA	13562276	0.98	25520	NA	37137752	2.69	66464	NA	11260	NA	160562696	11.66	2687616	0.19
Aves	Aratinga_weddellii	190661	Chordata	Aves	Psittaciformes	Psittacidae	GCA_009867205.1	0.7	1.3542e+09	NA	NA	108	CRC_AvianBodyMasses	NA	4.68213	437	0.00470699	0.0291728	0.161348	NA	NA	NA	NA	0.119794	0.0593054	0.217148	0.119038	0.0841105	0.12639	179279628	13.33	224148	0.01	1312	NA	14823520	1.1	3012	NA	38224536	2.84	69696	NA	NA	NA	124714132	9.27	1219272	0.09
Aves	Eupsittula_pertinax	492513	Chordata	Aves	Psittaciformes	Psittacidae	GCA_011317185.1	4.9	1.42391e+09	NA	NA	NA	NA	NA	NA	322	0.00362178	0.0215297	0.168222	596	0.00936228	0.0600801	0.15583	0.0559186	0.0750265	0.232508	0.055172	0.113906	0.126926	230238328	16.28	187376	0.01	1392	NA	16135428	1.14	70624	NA	37529828	2.65	122928	NA	1696	NA	172828024	12.22	3361032	0.23
Aves	Guaruba_guarouba	51906	Chordata	Aves	Psittaciformes	Psittacidae	GCA_011800095.1	0.6	1.39958e+09	23.2	AnAge	250	AnAge	3.14415	5.52146	348	0.00419394	0.0207156	0.202453	NA	NA	NA	NA	0.0559186	0.067399	0.229769	0.055172	0.112521	0.128894	237110040	17.06	238068	0.01	4816	NA	16516904	1.18	17108	NA	31890032	2.29	73056	NA	1400	NA	187210524	13.47	1158132	0.08
Aves	Pyrrhura_cruentata	311901	Chordata	Aves	Psittaciformes	Psittacidae	GCA_016545565.1	0.3	1.36823e+09	NA	NA	NA	NA	NA	NA	370	0.00459238	0.0210576	0.218087	NA	NA	NA	NA	0.0324156	0.160211	0.235691	0.0430432	0.215225	0.166589	198305780	14.59	239440	0.01	3572	NA	16062492	1.18	20112	NA	33934436	2.49	134628	NA	10844	NA	146498552	10.78	1401704	0.1
Aves	Pyrrhura_frontalis	211511	Chordata	Aves	Psittaciformes	Psittacidae	GCA_010014865.1	0.5	1.35271e+09	NA	NA	80.125	CRC_AvianBodyMasses	NA	4.38359	230	0.00276296	0.015338	0.180138	643	0.00983912	0.0623122	0.1579	0.0171582	0.154684	0.234838	0.0197319	0.168151	0.14834	239985144	17.86	114152	NA	8748	NA	16502648	1.22	20996	NA	38260920	2.84	91980	NA	NA	NA	181479944	13.5	3505756	0.26
Aves	Pyrrhura_molinae	311895	Chordata	Aves	Psittaciformes	Psittacidae	GCA_011763355.1	0.6	1330080000	NA	NA	77.1	CRC_AvianBodyMasses	NA	4.3451	239	0.00249492	0.0121231	0.205798	NA	NA	NA	NA	0.0131781	0.161927	0.233349	0.0165071	0.190207	0.153776	180564504	13.66	241296	0.01	11680	NA	15299208	1.15	9348	NA	37983284	2.87	104532	NA	9404	NA	122416008	9.26	4489744	0.33
Aves	Pyrrhura_perlata	311897	Chordata	Aves	Psittaciformes	Psittacidae	GCA_011763455.1	0.6	1.35107e+09	14.3	AnAge	75	CRC_AvianBodyMasses	2.66026	4.31749	292	0.0038738	0.0175334	0.220938	NA	NA	NA	NA	0.0131781	0.17397	0.235105	0.0165071	0.2283	0.154102	176977308	13.19	212692	0.01	1564	NA	13564032	1.01	42968	NA	37544632	2.79	134496	0.01	1132	NA	123849352	9.23	1626440	0.12
Aves	Psittacus_erithacus	57247	Chordata	Aves	Psittaciformes	Psittacidae	GCA_009867235.1	0.9	1261620000	49.7	AnAge	333	CRC_AvianBodyMasses	3.906	5.80814	251	0.00402885	0.0201753	0.199692	NA	NA	NA	NA	0.0638092	0.0256626	0.217885	0.0632541	0.0476474	0.118628	168555580	13.45	162712	0.01	2192	NA	16153072	1.28	13516	NA	24507740	1.95	46172	NA	388	NA	125790808	10.04	1878980	0.14
Aves	Psittacus_timneh	1549196	Chordata	Aves	Psittaciformes	Psittacidae	GCA_009867315.1	0.6	1.34194e+09	NA	NA	NA	NA	NA	NA	255	0.00419533	0.0200007	0.209759	NA	NA	NA	NA	0.0638092	0.033404	0.226762	0.0632541	0.0476977	0.116336	202777856	15.21	227980	0.01	2376	NA	17059120	1.28	8952	NA	30049140	2.25	48576	NA	102032	NA	152120820	11.41	3158860	0.23
Aves	Rhinopomastus_cyanomelas	113115	Chordata	Aves	Upupiformes	Rhinopomastidae	GCA_013400115.1	0.2	1105140000	NA	NA	28	CRC_AvianBodyMasses	NA	3.3322	622	0.0866558	0.739918	0.117115	841	0.085837	0.761887	0.112664	0.718525	0.261361	0.166147	0.631313	0.444267	0.0843216	252407660	23	837788	0.07	560	NA	1993180	0.18	2228	NA	172309108	15.7	517468	0.04	312	NA	76108704	6.93	638312	0.05
Aves	Caprimulgus_europaeus	111811	Chordata	Aves	Caprimulgiformes	Caprimulgidae	GCA_907165065.1	0.8	1.43134e+09	11.9	AnAge	67	CRC_AvianBodyMasses	2.47654	4.20469	618	0.0434776	0.334692	0.129903	829	0.0443747	0.343006	0.12937	0.720858	0.101365	0.192708	0.650652	0.230439	0.10588	154474180	10.86	550004	0.03	2944	NA	21505164	1.51	20432	NA	43620752	3.06	52612	NA	NA	NA	86302672	6.07	2419600	0.17
Aves	Podargus_strigoides	8905	Chordata	Aves	Caprimulgiformes	Podargidae	GCA_013399755.1	0.4	1.38367e+09	NA	NA	278	CRC_AvianBodyMasses	NA	5.62762	563	0.0458498	0.299901	0.152883	769	0.0453794	0.30732	0.147662	0.720858	0.112045	0.218745	0.650652	0.190765	0.122109	205213304	14.93	134884	NA	73904	NA	19014976	1.38	9104	NA	52385496	3.81	531744	0.03	2000	NA	132194988	9.62	866208	0.06
Aves	Corythaixoides_concolor	103956	Chordata	Aves	Musophagiformes	Musophagidae	GCA_013399495.1	0.4	1.44337e+09	NA	NA	258	CRC_AvianBodyMasses	NA	5.55296	605	0.0415151	0.292443	0.141959	809	0.0418129	0.300372	0.139204	0.784504	0.095207	0.190353	0.760818	0.165714	0.12077	267842612	18.68	96552	NA	13344	NA	26539424	1.85	20200	NA	28987076	2.02	52716	NA	3032	NA	197131556	13.75	14998712	1.04
Aves	Bubo_blakistoni	1564486	Chordata	Aves	Strigiformes	Strigidae	GCA_004320225.1	0.3	1.45079e+09	NA	NA	NA	NA	NA	NA	506	0.00613083	0.0321531	0.190676	NA	NA	NA	NA	0.229447	0.0388882	0.216366	0.290323	0.0526193	0.12351	283813752	19.69	200476	0.01	43684	NA	25120732	1.74	128	NA	25198016	1.74	64120	NA	4740	NA	230544724	16	2637132	0.18
Aves	Bubo_scandiacus	371907	Chordata	Aves	Strigiformes	Strigidae	GCA_017315185.1	1.4	1.52103e+09	28	AnAge	2042.5	CRC_AvianBodyMasses	3.3322	7.62193	555	0.0056292	0.0347694	0.161901	NA	NA	NA	NA	0.229447	0.0378289	0.20991	0.290323	0.0604534	0.12631	221712776	14.67	119432	NA	13248	NA	22809372	1.51	21660	NA	26823664	1.77	48528	NA	1060	NA	165854900	10.98	6020912	0.39
Aves	Bubo_bubo	30461	Chordata	Aves	Strigiformes	Strigidae	GCA_010303855.1	0.2	1985340000	68	AnAge	2686	CRC_AvianBodyMasses	4.21951	7.89581	555	0.00880808	0.0524489	0.167936	NA	NA	NA	NA	0.284909	0.0399247	0.213724	0.33172	0.0743775	0.105233	472525600	24.06	119172	NA	NA	NA	27971296	1.42	7948	NA	33408584	1.7	28448	NA	376	NA	404712256	20.6	6277520	0.31
Aves	Ciccaba_nigrolineata	1118524	Chordata	Aves	Strigiformes	Strigidae	GCA_013396715.1	0.4	1.4438e+09	NA	NA	458.5	CRC_AvianBodyMasses	NA	6.12796	558	0.00735826	0.0468611	0.157023	NA	NA	NA	NA	0.284909	0.04749	0.208151	0.33172	0.0786206	0.103617	245021624	17.09	300216	0.02	9632	NA	26424420	1.84	18872	NA	27194040	1.89	83752	NA	NA	NA	189691396	13.23	1299296	0.09
Aves	Otus_sunia	257818	Chordata	Aves	Strigiformes	Strigidae	GCA_010365825.1	0.3	1.49627e+09	NA	NA	72.1	CRC_AvianBodyMasses	NA	4.27805	607	0.0139442	0.0946422	0.147336	NA	NA	NA	NA	0.293979	0.0827567	0.202065	0.336947	0.116101	0.0967174	222116288	15	82512	NA	38224	NA	21723116	1.46	26492	NA	28298068	1.91	19476	NA	NA	NA	171087124	11.55	841276	0.05
Aves	Strix_occidentalis_caurina	311401	Chordata	Aves	Strigiformes	Strigidae	GCA_002372975.2	1.2	1.52415e+09	25	AnAge	606	CRC_AvianBodyMasses	3.21888	6.40688	569	0.00686125	0.0463001	0.148191	NA	NA	NA	NA	0.294978	0.0489398	0.208643	0.337726	0.0753359	0.101892	170768972	11.28	208856	0.01	36536	NA	26349688	1.74	20116	NA	26679628	1.76	105880	NA	740	NA	116196176	7.68	1171352	0.07
Aves	Glaucidium_brasilianum	78217	Chordata	Aves	Strigiformes	Strigidae	GCA_013399595.1	0.2	1.42208e+09	NA	NA	70.75	CRC_AvianBodyMasses	NA	4.25915	609	0.0231456	0.148762	0.155588	822	0.0442626	0.309337	0.143088	0.473805	0.0797105	0.216577	0.523289	0.135891	0.118085	231058960	16.36	128260	NA	56028	NA	22760200	1.61	13460	NA	26536244	1.87	52452	NA	NA	NA	180842712	12.81	669604	0.04
Aves	Aramus_guarauna	54356	Chordata	Aves	Gruiformes	Aramidae	GCA_013400195.1	0.3	1.42253e+09	NA	NA	1080	CRC_AvianBodyMasses	NA	6.98472	609	0.0177814	0.124845	0.142428	805	0.0271466	0.197179	0.137675	0.443833	0.0742032	0.18428	0.470401	0.110267	0.127588	224651008	15.9	129976	NA	117724	NA	28304972	2	8208	NA	24028456	1.7	56224	NA	1164	NA	169370420	11.99	2633468	0.18
Aves	Grus_nigricollis	40817	Chordata	Aves	Gruiformes	Gruidae	GCA_004360235.1	0.4	1564800000	NA	NA	6000	CRC_AvianBodyMasses	NA	8.69951	620	0.0149255	0.103343	0.144427	NA	NA	NA	NA	0.443833	0.0655109	0.187017	0.470401	0.0933797	0.09457	202761868	13.04	144572	NA	5992	NA	36150408	2.32	5372	NA	26097620	1.67	60084	NA	500	NA	138385964	8.9	1911356	0.12
Aves	Heliornis_fulica	54369	Chordata	Aves	Gruiformes	Heliornithidae	GCA_013399135.1	0.2	1.33366e+09	NA	NA	132	CRC_AvianBodyMasses	NA	4.8828	594	0.0608008	0.460568	0.132013	780	0.0583391	0.458815	0.127152	0.65456	0.177024	0.181123	0.654347	0.301545	0.0962449	272715656	20.6	90816	NA	1492	NA	15446980	1.16	896	NA	68963508	5.21	127920	NA	NA	NA	187748488	14.18	335556	0.02
Aves	Calonectris_borealis	1323832	Chordata	Aves	Procellariiformes	Procellariidae	GCA_013401115.1	0.4	1.41715e+09	NA	NA	NA	NA	NA	NA	559	0.0111083	0.0722299	0.153791	762	0.011636	0.0762748	0.152553	0.47011	0.0439597	0.195605	0.544236	0.0548877	0.129945	143839884	10.21	198780	0.01	860	NA	25376980	1.8	59132	NA	25136420	1.78	201428	0.01	196	NA	89480760	6.35	3385328	0.24
Aves	Pelecanoides_urinatrix	37079	Chordata	Aves	Procellariiformes	Pelecanoididae	GCA_013400755.1	0.2	1.46485e+09	NA	NA	141	CRC_AvianBodyMasses	NA	4.94876	596	0.0156106	0.0961913	0.162287	819	0.0165262	0.099297	0.166432	0.47011	0.0493889	0.179372	0.544236	0.0677017	0.115465	271935536	18.68	190168	0.01	1200	NA	37028552	2.54	51128	NA	46859248	3.22	426932	0.02	18636	NA	182272420	12.52	5087252	0.34
Aves	Phalacrocorax_auritus	56069	Chordata	Aves	Pelecaniformes	Phalacrocoracidae	GCA_002173455.1	1.5	1398540000	22.5	AnAge	1674	CRC_AvianBodyMasses	3.11352	7.42297	454	0.0033269	0.0201038	0.165486	NA	NA	NA	NA	0.0643476	0.0778812	0.210878	0.0851193	0.102217	0.129959	244984320	17.64	166880	0.01	68752	NA	24990768	1.8	37624	NA	44370140	3.19	50848	NA	220	NA	173303616	12.48	1995472	0.14
Aves	Phalacrocorax_harrisi	473964	Chordata	Aves	Pelecaniformes	Phalacrocoracidae	GCA_002173475.1	0.3	1.46185e+09	NA	NA	3050	CRC_AvianBodyMasses	NA	8.0229	511	0.00449711	0.0227822	0.197396	NA	NA	NA	NA	0.0643476	0.0794392	0.212741	0.0851193	0.105314	0.138361	196934136	13.61	14756	NA	42608	NA	32883520	2.27	9568	NA	51739792	3.57	7996	NA	900	NA	108813704	7.52	3421292	0.23
Aves	Phalacrocorax_pelagicus	2723871	Chordata	Aves	Pelecaniformes	Phalacrocoracidae	GCA_002173435.1	0.1	1.47113e+09	17.8	AnAge	1856.5	CRC_AvianBodyMasses	2.8792	7.52645	541	0.00461599	0.0271297	0.170145	NA	NA	NA	NA	0.119584	0.0633645	0.195227	0.149594	0.084658	0.119183	166972400	11.47	46248	NA	924	NA	20982392	1.44	14608	NA	53118436	3.65	7792	NA	NA	NA	90973580	6.25	1828420	0.12
Aves	Aegotheles_bennettii	48278	Chordata	Aves	Caprimulgiformes	Aegothelidae	GCA_013398125.1	0.2	1.32402e+09	NA	NA	53.625	CRC_AvianBodyMasses	NA	3.98202	585	0.0502664	0.408116	0.123167	769	0.0488465	0.412838	0.118319	0.710827	0.117634	0.176893	0.592481	0.337634	0.0899732	174991668	13.32	92544	NA	10180	NA	7822856	0.59	44960	NA	62872028	4.78	54692	NA	NA	NA	99534844	7.57	4559564	0.34
Aves	Ardeotis_kori	89386	Chordata	Aves	Gruiformes	Otididae	GCA_013396375.1	0.1	1388760000	NA	NA	8460	CRC_AvianBodyMasses	NA	9.0431	592	0.0155934	0.107575	0.144953	781	0.0159863	0.110652	0.144474	0.250564	0.0839741	0.197205	0.266601	0.177599	0.105391	NA	NA	NA	NA	NA	NA	NA	NA	NA	NA	NA	NA	NA	NA	NA	NA	NA	NA	NA	NA
Aves	Lophotis_ruficrista	172689	Chordata	Aves	Gruiformes	Otididae	GCA_013396455.1	0	1.35069e+09	NA	NA	NA	NA	NA	NA	601	0.017125	0.115321	0.148499	789	0.017482	0.118032	0.148113	0.250564	0.0993197	0.205445	0.266601	0.15426	0.110119	153689852	11.45	115912	NA	3912	NA	26489952	1.97	48428	NA	35671120	2.65	104340	NA	90324	NA	90491368	6.74	674496	0.05
Aves	Chionis_minor	227182	Chordata	Aves	Charadriiformes	Chionididae	GCA_013398295.1	0.1	1.42676e+09	NA	NA	588	CRC_AvianBodyMasses	NA	6.37673	613	0.0334206	0.252155	0.13254	827	0.0336046	0.256591	0.130966	0.572045	0.117853	0.192448	0.527546	0.181245	0.112612	116655860	8.26	27800	NA	NA	NA	10532048	0.74	7976	NA	44733984	3.16	5168	NA	NA	NA	61148668	4.33	200216	0.01
Aves	Ibidorhyncha_struthersii	425643	Chordata	Aves	Charadriiformes	Charadriidae	GCA_013398815.1	0.2	1.45673e+09	NA	NA	294	CRC_AvianBodyMasses	NA	5.68358	597	0.0262168	0.185727	0.141158	799	0.0266963	0.189797	0.140657	0.572045	0.0860174	0.200708	0.527546	0.168198	0.0880348	307929368	21.3	127400	NA	2492	NA	13144584	0.9	9752	NA	39587044	2.73	117084	NA	NA	NA	238758360	16.51	16182652	1.11
Aves	Larus_smithsonianus	243888	Chordata	Aves	Charadriiformes	Laridae	GCA_013400295.1	0.3	1.42742e+09	NA	NA	NA	NA	NA	NA	422	0.00553474	0.0273175	0.202607	NA	NA	NA	NA	0.067764	0.123692	0.180201	0.0547776	0.181604	0.127611	NA	NA	NA	NA	NA	NA	NA	NA	NA	NA	NA	NA	NA	NA	NA	NA	NA	NA	NA	NA
Aves	Rissa_tridactyla	75485	Chordata	Aves	Charadriiformes	Laridae	GCA_013401015.1	0.3	1.44959e+09	28.5	AnAge	407.5	CRC_AvianBodyMasses	3.3499	6.01004	506	0.00632972	0.035237	0.179633	NA	NA	NA	NA	0.067764	0.107767	0.180218	0.0547776	0.13162	0.121997	237232836	16.48	104584	NA	6312	NA	14484888	1	94676	NA	37595608	2.61	78572	NA	NA	NA	184314220	12.8	553976	0.03
Aves	Rynchops_niger	227184	Chordata	Aves	Charadriiformes	Laridae	GCA_013400035.1	0.2	1.4317e+09	20.2	AnAge	301.5	CRC_AvianBodyMasses	3.00568	5.70877	599	0.0140009	0.0968381	0.14458	NA	NA	NA	NA	0.205684	0.128334	0.162817	0.222739	0.172527	0.0978845	168560284	11.86	137620	NA	5620	NA	10009396	0.7	7376	NA	52904692	3.72	113404	NA	384	NA	104478228	7.35	903564	0.06
Aves	Stercorarius_parasiticus	54059	Chordata	Aves	Charadriiformes	Stercorariidae	GCA_013396915.1	0.4	1.40963e+09	31.1	AnAge	445.5	CRC_AvianBodyMasses	3.43721	6.0992	602	0.0142899	0.0965924	0.14794	805	0.0198961	0.134573	0.147846	0.271089	0.093642	0.179737	0.281718	0.172029	0.0952348	175846932	12.56	170936	0.01	8192	NA	7725232	0.55	32076	NA	41792772	2.98	139628	NA	1604	NA	123265444	8.81	2711048	0.19
Aves	Rhinoptilus_africanus	240209	Chordata	Aves	Charadriiformes	Glareolidae	GCA_013400135.1	0.3	1.4036e+09	NA	NA	87.5	CRC_AvianBodyMasses	NA	4.47164	593	0.023699	0.180475	0.131314	790	0.0234531	0.182217	0.128709	0.361184	0.144674	0.160309	0.366214	0.182112	0.1009	198177668	14.22	231272	0.01	4048	NA	17664056	1.26	28196	NA	62622264	4.49	175392	0.01	2772	NA	116724348	8.37	725320	0.05
Aves	Nycticryphes_semicollaris	227226	Chordata	Aves	Charadriiformes	Rostratulidae	GCA_013400055.1	0.3	1.36876e+09	NA	NA	NA	NA	NA	NA	600	0.0171596	0.125642	0.136576	810	0.0170613	0.128571	0.132699	0.182245	0.215178	0.169677	0.14116	0.361618	0.0852271	245869400	18.09	102824	NA	22796	NA	8590356	0.63	60608	NA	59938608	4.41	254320	0.01	NA	NA	168494836	12.4	8405052	0.61
Aves	Rostratula_benghalensis	118793	Chordata	Aves	Charadriiformes	Rostratulidae	GCA_013399305.1	0.3	1.34094e+09	NA	NA	121	CRC_AvianBodyMasses	NA	4.79579	606	0.0237028	0.171542	0.138175	810	0.0236515	0.17365	0.136202	0.182245	0.248337	0.152635	0.14116	0.48226	0.112661	153853772	11.55	107012	NA	16804	NA	6266664	0.47	18404	NA	57073588	4.28	236020	0.01	3608	NA	89207340	6.69	924332	0.06
Aves	Thinocorus_orbignyianus	161742	Chordata	Aves	Ciconiiformes	Thinocoridae	GCA_013400375.1	0.3	1.328e+09	NA	NA	115	CRC_AvianBodyMasses	NA	4.74493	608	0.0344382	0.287636	0.119728	811	0.0350743	0.294306	0.119176	0.30978	0.222009	0.158396	0.23343	0.513301	0.0929587	184181828	13.97	93648	NA	420	NA	28395940	2.15	33300	NA	35771072	2.71	65132	NA	4628	NA	118392044	8.98	1425644	0.1
Aves	Scolopax_mira	1381582	Chordata	Aves	Charadriiformes	Scolopacidae	GCA_004320125.1	0.2	1.32665e+09	NA	NA	447	CRC_AvianBodyMasses	NA	6.10256	577	0.0311311	0.256406	0.121414	789	0.0325732	0.270145	0.120577	0.389283	0.178078	0.170446	0.292832	0.335114	0.0860026	165513536	12.56	80148	NA	5028	NA	7161400	0.54	1176	NA	44792408	3.39	109656	NA	2344	NA	112181280	8.51	1180096	0.08
Aves	Mesembrinibis_cayennensis	1118748	Chordata	Aves	Pelecaniformes	Threskiornithidae	GCA_013399675.1	0.2	1.4536e+09	NA	NA	756	CRC_AvianBodyMasses	NA	6.62804	599	0.0270676	0.200013	0.135329	803	0.0276985	0.204644	0.13535	0.788111	0.0619715	0.192058	0.772795	0.116348	0.0988175	299458880	20.75	503112	0.03	2840	NA	27137472	1.88	67664	NA	31303496	2.16	63920	NA	NA	NA	175026252	12.13	65354124	4.52
Aves	Aptenodytes_patagonicus	9234	Chordata	Aves	Sphenisciformes	Spheniscidae	GCA_010087175.1	0.4	1.52151e+09	26	AnAge	11751	CRC_AvianBodyMasses	3.2581	9.37169	557	0.00785223	0.0452729	0.173442	NA	NA	NA	NA	0.477784	0.0304601	0.203759	0.419012	0.0554676	0.139844	115311352	7.63	146992	NA	1956	NA	20701200	1.37	34892	NA	29909072	1.98	49500	NA	NA	NA	63781036	4.22	686704	0.04
Aves	Eudyptes_chrysocome	79626	Chordata	Aves	Sphenisciformes	Spheniscidae	GCA_010085355.1	0.5	1.49582e+09	NA	NA	2330	CRC_AvianBodyMasses	NA	7.75362	308	0.00241067	0.0127334	0.189319	NA	NA	NA	NA	0.0421932	0.0299751	0.240774	0.0868022	0.0587969	0.16735	187169452	12.59	270956	0.01	NA	NA	26012584	1.75	32960	NA	37373720	2.51	119632	NA	NA	NA	119864628	8.06	3494972	0.23
Aves	Eudyptes_filholi	1419345	Chordata	Aves	Sphenisciformes	Spheniscidae	GCA_010085365.1	0.4	1.48724e+09	NA	NA	NA	NA	NA	NA	290	0.00260186	0.0134834	0.192967	NA	NA	NA	NA	0.0421932	0.0399706	0.243082	0.0868022	0.0468941	0.173158	192025928	13	184832	0.01	7788	NA	26106868	1.76	56500	NA	39247448	2.65	88088	NA	2700	NA	111978732	7.58	14352972	0.97
Aves	Eudyptes_pachyrhynchus	37080	Chordata	Aves	Sphenisciformes	Spheniscidae	GCA_010085335.1	30.3	1.57381e+09	NA	NA	3910	CRC_AvianBodyMasses	NA	8.27129	235	0.0292873	0.309814	0.0945318	342	0.0298101	0.281689	0.105826	NA	NA	NA	NA	NA	NA	189991736	12.15	359668	0.02	1428	NA	32939884	2.1	32984	NA	32478232	2.07	150420	NA	NA	NA	114030224	7.29	9998896	0.63
Aves	Eudyptes_robustus	345251	Chordata	Aves	Sphenisciformes	Spheniscidae	GCA_010085315.1	10.3	1.50866e+09	NA	NA	3050	CRC_AvianBodyMasses	NA	8.0229	248	0.00335105	0.0140042	0.239289	475	0.0111978	0.0728734	0.153661	0.0751818	0.0367542	0.244859	0.0903249	0.0733	0.194229	217572684	14.52	498704	0.03	3924	NA	36180996	2.41	9716	NA	36956344	2.46	188124	0.01	384	NA	138777608	9.26	4956884	0.33
Aves	Eudyptes_sclateri	92688	Chordata	Aves	Sphenisciformes	Spheniscidae	GCA_010078445.1	0.2	1.47202e+09	NA	NA	5908	CRC_AvianBodyMasses	NA	8.68406	321	0.00365387	0.0150264	0.243164	NA	NA	NA	NA	0.0751818	0.0277469	0.245163	0.0903249	0.0638061	0.208564	179313368	12.26	250140	0.01	6444	NA	28596792	1.95	44072	NA	36424984	2.49	101216	NA	876	NA	109651620	7.5	4236828	0.28
Aves	Eudyptes_chrysolophus	79627	Chordata	Aves	Sphenisciformes	Spheniscidae	GCA_010084205.1	5.7	1.65877e+09	NA	NA	4490	CRC_AvianBodyMasses	NA	8.40961	374	0.00374611	0.0164882	0.2272	NA	NA	NA	NA	0.10826	0.0245319	0.225529	0.139246	0.0485195	0.2141	133724832	8.12	110076	NA	1320	NA	29321924	1.78	512	NA	36445268	2.21	48900	NA	484	NA	65607352	3.98	2188996	0.13
Aves	Megadyptes_antipodes_antipodes	2517240	Chordata	Aves	Sphenisciformes	Spheniscidae	GCA_010078485.1	0.5	1.59734e+09	NA	NA	5330	CRC_AvianBodyMasses	NA	8.58111	482	0.00446511	0.0215982	0.206735	NA	NA	NA	NA	0.193865	0.0246038	0.219871	0.180867	0.0541356	0.173198	162525048	10.25	134344	NA	1816	NA	32505928	2.05	1920	NA	43427728	2.73	77236	NA	852	NA	77063388	4.86	9311836	0.58
Aves	Spheniscus_demersus	92683	Chordata	Aves	Sphenisciformes	Spheniscidae	GCA_010077935.1	0.2	1594140000	27.3	AnAge	3135	CRC_AvianBodyMasses	3.30689	8.05038	290	0.00307039	0.0128612	0.238734	NA	NA	NA	NA	0.0867497	0.0194158	0.231188	0.108595	0.0358034	0.183498	147708520	9.33	206328	0.01	1120	NA	30651700	1.93	4072	NA	34601896	2.18	80504	NA	540	NA	75301604	4.75	6860756	0.43
Aves	Spheniscus_magellanicus	37081	Chordata	Aves	Sphenisciformes	Spheniscidae	GCA_010076225.1	0.8	1.53112e+09	30	AnAge	4120	CRC_AvianBodyMasses	3.4012	8.32361	299	0.00294607	0.0148011	0.199043	NA	NA	NA	NA	0.0867497	0.0175237	0.229277	0.108595	0.0499312	0.191359	210342664	13.83	215104	0.01	9020	NA	32690096	2.15	14072	NA	29605520	1.94	94396	NA	592	NA	133655844	8.79	14058020	0.92
Aves	Eudyptula_albosignata	345258	Chordata	Aves	Sphenisciformes	Spheniscidae	GCA_010080465.1	5.8	1.6646e+09	NA	NA	NA	NA	NA	NA	216	0.00320962	0.0131959	0.243229	NA	NA	NA	NA	0.031671	0.0429929	0.278813	0.0558299	0.0507623	0.183048	171424092	10.37	246604	0.01	1868	NA	37057792	2.24	38068	NA	44826740	2.71	81200	NA	NA	NA	79498412	4.81	9673408	0.58
Aves	Eudyptula_minor	37083	Chordata	Aves	Sphenisciformes	Spheniscidae	GCA_010080355.1	6.3	1.77607e+09	25.6	AnAge	1110	CRC_AvianBodyMasses	3.24259	7.01212	206	0.00286104	0.0121997	0.234517	NA	NA	NA	NA	0.031671	0.0388938	0.27639	0.0558299	0.051656	0.184086	199104624	11.29	241268	0.01	13816	NA	45674972	2.59	50576	NA	45498360	2.58	109740	NA	2224	NA	88806484	5.03	18707184	1.06
Aves	Eudyptula_novaehollandiae	2052820	Chordata	Aves	Sphenisciformes	Spheniscidae	GCA_010078495.1	3.1	1.64421e+09	NA	NA	NA	NA	NA	NA	336	0.00304922	0.0141397	0.21565	NA	NA	NA	NA	0.109347	0.0296305	0.269444	0.0840657	0.0826619	0.177058	175200640	10.73	182384	0.01	3144	NA	30848824	1.89	15540	NA	50717136	3.1	86516	NA	2312	NA	73503908	4.5	19840876	1.21
Aves	Pygoscelis_antarcticus	79643	Chordata	Aves	Sphenisciformes	Spheniscidae	GCA_010078415.1	0.6	1.53138e+09	NA	NA	4155.5	CRC_AvianBodyMasses	NA	8.33219	516	0.00457632	0.0245047	0.186753	NA	NA	NA	NA	0.179797	0.0371928	0.206599	0.215675	0.0577779	0.160094	122880836	8.08	66340	NA	520	NA	24397944	1.6	4296	NA	28903168	1.9	62404	NA	NA	NA	62545824	4.11	6900340	0.45
Aves	Pygoscelis_papua	30457	Chordata	Aves	Sphenisciformes	Spheniscidae	GCA_010090195.1	0.6	1.58765e+09	NA	NA	5950	CRC_AvianBodyMasses	NA	8.69115	499	0.00455226	0.0243809	0.186714	NA	NA	NA	NA	0.179797	0.029564	0.190125	0.215675	0.0495963	0.161495	184259788	11.69	164644	0.01	3392	NA	36072596	2.28	9056	NA	32679780	2.07	89308	NA	1828	NA	92881292	5.89	22357892	1.41
Aves	Butorides_virescens	110671	Chordata	Aves	Pelecaniformes	Ardeidae	GCA_017310255.1	1.2	1.45171e+09	11.6	AnAge	212	CRC_AvianBodyMasses	2.45101	5.35659	599	0.0177726	0.125733	0.141352	794	0.0182518	0.126745	0.144005	0.442338	0.0755759	0.185539	0.418994	0.129777	0.114885	131913332	9.15	390720	0.02	34524	NA	15835600	1.09	49228	NA	39315352	2.72	25548	NA	NA	NA	72007364	4.99	4254996	0.29
Aves	Cochlearius_cochlearius	110676	Chordata	Aves	Pelecaniformes	Ardeidae	GCA_013396365.1	0.3	1.42644e+09	NA	NA	645	CRC_AvianBodyMasses	NA	6.46925	605	0.0173335	0.117063	0.14807	805	0.01799	0.12121	0.14842	0.442338	0.0658048	0.16619	0.418994	0.104075	0.134743	197236948	13.92	248660	0.01	10980	NA	16732908	1.18	21220	NA	39805032	2.8	112852	NA	NA	NA	136895392	9.66	3409904	0.24
Aves	Psophia_crepitans	54359	Chordata	Aves	Gruiformes	Psophiidae	GCA_013399095.1	0.1	1.42101e+09	NA	NA	1026	CRC_AvianBodyMasses	NA	6.93342	590	0.043445	0.333195	0.130389	779	0.0423635	0.333627	0.126979	0.743063	0.115667	0.180087	0.70111	0.19268	0.0871443	174549548	12.37	137272	NA	4080	NA	19244696	1.36	37304	NA	51432680	3.64	52108	NA	360	NA	103298872	7.32	342176	0.02
Aves	Aquila_chrysaetos_chrysaetos	223781	Chordata	Aves	Accipitriformes	Accipitridae	GCA_900496995.4	1.2	1.49902e+09	48	AnAge	4263.5	CRC_AvianBodyMasses	3.8712	8.35785	550	0.00569989	0.0348129	0.163729	NA	NA	NA	NA	0.237872	0.0319315	0.175163	0.235878	0.0682757	0.109727	191560348	12.86	237792	0.01	12664	NA	31151376	2.09	43464	NA	16235904	1.09	56660	NA	5972	NA	138796948	9.32	5019568	0.33
Aves	Haliaeetus_leucocephalus	52644	Chordata	Aves	Accipitriformes	Accipitridae	GCA_000737465.1	0.2	1398540000	48	AnAge	4740	CRC_AvianBodyMasses	3.8712	8.46379	439	0.00364921	0.0208993	0.174609	NA	NA	NA	NA	0.0272652	0.172242	0.20827	0.0251166	0.322818	0.10191	NA	NA	NA	NA	NA	NA	NA	NA	NA	NA	NA	NA	NA	NA	NA	NA	NA	NA	NA	NA
Aves	Haliaeetus_pelagicus	52647	Chordata	Aves	Accipitriformes	Accipitridae	GCA_014363185.1	0.6	1.42913e+09	NA	NA	7757	CRC_AvianBodyMasses	NA	8.95635	405	0.00393622	0.0208536	0.188755	NA	NA	NA	NA	0.0272652	0.165659	0.208109	0.0251166	0.304646	0.102024	NA	NA	NA	NA	NA	NA	NA	NA	NA	NA	NA	NA	NA	NA	NA	NA	NA	NA	NA	NA
Aves	Nisaetus_nipalensis	214438	Chordata	Aves	Accipitriformes	Accipitridae	GCA_012487455.1	0.5	1.45826e+09	NA	NA	NA	NA	NA	NA	513	0.00576529	0.032879	0.175349	NA	NA	NA	NA	0.205384	0.0368363	0.193898	0.196656	0.0848293	0.103098	176970428	12.22	168456	0.01	6712	NA	32231552	2.22	69792	NA	19620804	1.35	113264	NA	16496	NA	123677068	8.54	1066284	0.07
Aves	Spizaetus_tyrannus	252798	Chordata	Aves	Accipitriformes	Accipitridae	GCA_013399215.1	0.1	1.43966e+09	NA	NA	1013	CRC_AvianBodyMasses	NA	6.92067	544	0.00568772	0.0305765	0.186016	NA	NA	NA	NA	0.205384	0.0362835	0.188058	0.196656	0.0837085	0.102504	187423404	13.11	165932	0.01	2276	NA	24535784	1.71	20288	NA	18978856	1.32	75340	NA	2616	NA	142488020	9.96	1154292	0.08
Aves	Buteo_japonicus	224669	Chordata	Aves	Accipitriformes	Accipitridae	GCA_010312235.1	0.7	1.5305e+09	NA	NA	NA	NA	NA	NA	582	0.0111189	0.0725453	0.153269	NA	NA	NA	NA	0.386017	0.0497396	0.181739	0.357491	0.0981547	0.0896781	145154920	9.58	42376	NA	15180	NA	26453284	1.74	NA	NA	14751908	0.97	11680	NA	NA	NA	102684648	6.78	1195844	0.07
Aves	Chunga_burmeisteri	1352770	Chordata	Aves	Cariamiformes	Cariamidae	GCA_013396505.1	0.2	1.42033e+09	NA	NA	1298	CRC_AvianBodyMasses	NA	7.16858	611	0.0337528	0.222584	0.151641	828	0.0359056	0.248403	0.144546	0.756986	0.0792118	0.192249	0.701631	0.152366	0.100612	155731308	11.04	360420	0.02	10120	NA	14189680	1	31652	NA	30083872	2.13	85416	NA	2104	NA	109635524	7.77	1332520	0.09
Aves	Baryphthengus_martii	176943	Chordata	Aves	Coraciiformes	Momotidae	GCA_013396935.1	0.5	1467000000	NA	NA	153	CRC_AvianBodyMasses	NA	5.03044	573	0.0384982	0.329733	0.116756	764	0.0388998	0.340694	0.114178	0.577213	0.148227	0.148803	0.399596	0.331256	0.0935318	NA	NA	NA	NA	NA	NA	NA	NA	NA	NA	NA	NA	NA	NA	NA	NA	NA	NA	NA	NA
Aves	Halcyon_senegalensis	342381	Chordata	Aves	Coraciiformes	Alcedinidae	GCA_013397595.1	0.2	1.38286e+09	NA	NA	74.5	CRC_AvianBodyMasses	NA	4.3108	608	0.0355028	0.2712	0.13091	805	0.0355131	0.278263	0.127624	0.577213	0.133865	0.160235	0.399596	0.238301	0.104602	247756356	18.03	124544	NA	10856	NA	17445272	1.26	67564	NA	83417976	6.07	384044	0.02	2424	NA	144613608	10.52	1690068	0.12
Aves	Eurystomus_gularis	325343	Chordata	Aves	Coraciiformes	Coraciidae	GCA_013400335.1	0.1	1.37366e+09	NA	NA	96.3	CRC_AvianBodyMasses	NA	4.56747	569	0.0408174	0.319105	0.127912	766	0.0399992	0.323016	0.12383	0.691014	0.127683	0.186757	0.591963	0.190527	0.107511	248941856	18.25	297236	0.02	8916	NA	26064160	1.91	4876	NA	67206988	4.92	169676	0.01	544	NA	152686500	11.19	2502960	0.18
Aves	Falco_tinnunculus	100819	Chordata	Aves	Falconiformes	Falconidae	GCA_010332995.1	0.6	1506120000	23.8	AnAge	184	CRC_AvianBodyMasses	3.16969	5.21494	609	0.0312995	0.206144	0.151833	815	0.0315597	0.209828	0.150408	0.600733	0.0960543	0.202142	0.636691	0.135834	0.0941784	175002404	11.73	454504	0.03	568	NA	13382484	0.89	304	NA	17652600	1.18	14432	NA	NA	NA	139377896	9.34	4119616	0.27
Aves	Herpetotheres_cachinnans	56343	Chordata	Aves	Falconiformes	Falconidae	GCA_013399355.1	0.2	1.42832e+09	NA	NA	625	CRC_AvianBodyMasses	NA	6.43775	609	0.0180671	0.119898	0.150687	831	0.0192385	0.129688	0.148345	0.600733	0.0536162	0.193607	0.636691	0.0876111	0.102577	189899860	13.38	132236	NA	1149972	0.08	19056808	1.34	91032	NA	28438840	2	222704	0.01	NA	NA	139977084	9.86	831184	0.05
Aves	Rhynochetos_jubatus	54386	Chordata	Aves	Gruiformes	Rhynochetidae	GCA_013398095.1	0.5	1.35705e+09	NA	NA	860	CRC_AvianBodyMasses	NA	6.75693	601	0.0526607	0.427068	0.123308	797	0.0517381	0.427992	0.120886	0.875714	0.124891	0.155949	0.890846	0.177044	0.0997569	240836952	17.89	66396	NA	2100	NA	18741416	1.39	163428	0.01	27573812	2.04	29256	NA	NA	NA	192164308	14.27	2096236	0.15
Aves	Anseranas_semipalmata	8851	Chordata	Aves	Anseriformes	Anseranatidae	GCA_013399115.1	0.2	1.37523e+09	NA	NA	2418.5	CRC_AvianBodyMasses	NA	7.7909	597	0.0247918	0.16972	0.146075	803	0.0254568	0.175216	0.145288	0.782246	0.060982	0.184549	0.805948	0.0919208	0.104155	201696304	14.77	149324	0.01	3124	NA	9370588	0.68	3376	NA	30669488	2.24	63904	NA	NA	NA	160199872	11.73	1236628	0.09
Aves	Anser_brachyrhynchus	132585	Chordata	Aves	Anseriformes	Anatidae	GCA_002592135.1	0.3	1.35776e+09	40.9	AnAge	2645	CRC_AvianBodyMasses	3.71113	7.88043	575	0.00810348	0.0480146	0.168771	NA	NA	NA	NA	0.216172	0.0636821	0.16886	0.24947	0.06445	0.193614	143370892	10.65	82960	NA	324	NA	11096504	0.82	2200	NA	36380200	2.7	67348	NA	1388	NA	93770176	6.96	1969792	0.14
Aves	Branta_canadensis	8853	Chordata	Aves	Anseriformes	Anatidae	GCA_006130075.1	0.8	1.4018e+09	42	AnAge	3564	CRC_AvianBodyMasses	3.73767	8.17864	559	0.00641862	0.0444459	0.144414	813	0.0169405	0.117983	0.143583	0.216172	0.0547315	0.167544	0.24947	0.0626478	0.146047	NA	NA	NA	NA	NA	NA	NA	NA	NA	NA	NA	NA	NA	NA	NA	NA	NA	NA	NA	NA
Aves	Asarcornis_scutulata	75869	Chordata	Aves	Anseriformes	Anatidae	GCA_013398475.1	0.6	1.35895e+09	NA	NA	NA	NA	NA	NA	566	0.00685249	0.0477697	0.143448	NA	NA	NA	NA	0.116263	0.108547	0.172192	0.124725	0.158649	0.118745	NA	NA	NA	NA	NA	NA	NA	NA	NA	NA	NA	NA	NA	NA	NA	NA	NA	NA	NA	NA
Aves	Cairina_moschata	8855	Chordata	Aves	Anseriformes	Anatidae	GCA_018104995.1	0.1	1310520000	NA	NA	2450	CRC_AvianBodyMasses	NA	7.80384	601	0.0134792	0.0941652	0.143145	NA	NA	NA	NA	0.116263	0.222692	0.183135	0.124725	0.295746	0.115138	156040944	11.99	74424	NA	9800	NA	12489892	0.95	20160	NA	31413032	2.41	129960	NA	3068	NA	106755404	8.2	5145204	0.39
Aves	Aythya_fuligula	219594	Chordata	Aves	Anseriformes	Anatidae	GCA_009819795.1	0.8	1.36987e+09	45.2	AnAge	701.5	CRC_AvianBodyMasses	3.8111	6.55322	564	0.00527315	0.0450194	0.117131	837	0.0253984	0.208758	0.121664	0.124428	0.0794665	0.163677	0.132091	0.146222	0.113515	126331568	9.28	113748	NA	8448	NA	16384440	1.2	1756	NA	32804804	2.41	27404	NA	NA	NA	73506468	5.4	3484500	0.25
Aves	Callipepla_squamata	9009	Chordata	Aves	Galliformes	Odontophoridae	GCA_002218305.1	1	1.27096e+09	NA	NA	184	CRC_AvianBodyMasses	NA	5.21494	586	0.00782593	0.0559725	0.139817	823	0.0197754	0.174583	0.113272	0.0730781	0.252167	0.151135	0.0951808	0.202067	0.123678	NA	NA	NA	NA	NA	NA	NA	NA	NA	NA	NA	NA	NA	NA	NA	NA	NA	NA	NA	NA
Aves	Colinus_virginianus	9014	Chordata	Aves	Galliformes	Odontophoridae	GCA_008692595.2	0.3	1.15387e+09	6.4	AnAge	178	CRC_AvianBodyMasses	1.8563	5.18178	585	0.00817369	0.0565355	0.144576	NA	NA	NA	NA	0.0730781	0.263563	0.148496	0.0951808	0.251177	0.138349	174197028	15.2	1910688	0.16	1560	NA	15472556	1.35	1464	NA	37824876	3.3	39188	NA	1276	NA	110876732	9.67	8068688	0.7
Aves	Odontophorus_gujanensis	886794	Chordata	Aves	Galliformes	Odontophoridae	GCA_013399175.1	0.2	1.18919e+09	NA	NA	314.5	CRC_AvianBodyMasses	NA	5.75098	600	0.0158396	0.105403	0.150277	795	0.0164452	0.112812	0.145775	0.242449	0.144942	0.140952	0.255061	0.161532	0.112195	206662496	17.5	1564668	0.13	1016	NA	19847124	1.68	5508	NA	48216000	4.08	62420	NA	3924	NA	134289072	11.37	2672764	0.22
Aves	Coturnix_japonica	93934	Chordata	Aves	Galliformes	Phasianidae	GCA_001577835.2	0.2	1378980000	6	AnAge	94.8	CRC_AvianBodyMasses	1.79176	4.55177	617	0.0374125	0.303861	0.123124	833	0.0376801	0.312544	0.120559	0.370173	0.222537	0.158129	0.333148	0.401495	0.0819683	341419728	25.03	9445872	0.69	1144	NA	14520504	1.06	NA	NA	52801980	3.87	553468	0.04	NA	NA	259036004	18.99	5059992	0.37
Aves	Lagopus_leucura	30410	Chordata	Aves	Galliformes	Phasianidae	GCA_019238085.1	0.6	1.23555e+09	15	AnAge	355	CRC_AvianBodyMasses	2.70805	5.87212	538	0.00669802	0.0460573	0.145428	827	0.0194213	0.161942	0.119927	0.0603438	0.158125	0.19025	0.0549163	0.253684	0.0939853	107991544	8.8	1534708	0.12	90764	NA	4804008	0.39	80680	NA	48307016	3.93	397304	0.03	508	NA	51045412	4.16	1731144	0.14
Aves	Lagopus_muta_japonica	1604048	Chordata	Aves	Galliformes	Phasianidae	GCA_004320205.1	0.4	1.21925e+09	NA	NA	535.5	CRC_AvianBodyMasses	NA	6.2832	499	0.00561188	0.0380425	0.147516	NA	NA	NA	NA	0.0603438	0.221787	0.200372	0.0549163	0.246937	0.0915967	129156412	10.66	2304220	0.19	832	NA	5467672	0.45	13960	NA	48575792	4.01	74420	NA	3300	NA	71251212	5.88	1465004	0.12
Aves	Syrmaticus_mikado	9065	Chordata	Aves	Galliformes	Phasianidae	GCA_003435085.1	0.2	1.29655e+09	NA	NA	1157.5	CRC_AvianBodyMasses	NA	7.05402	617	0.0160465	0.117453	0.136621	831	0.0161083	0.122182	0.131838	0.256934	0.137239	0.167024	0.228027	0.190971	0.0915168	215538688	16.74	2459600	0.19	2436	NA	7351256	0.57	141200	0.01	54516908	4.23	44992	NA	332	NA	149698708	11.62	1323256	0.1
Aves	Pavo_muticus	9050	Chordata	Aves	Galliformes	Phasianidae	GCA_016647715.1	0.5	1310520000	NA	NA	2767.5	CRC_AvianBodyMasses	NA	7.9257	613	0.0197589	0.171022	0.115534	822	0.019586	0.171048	0.114506	0.391629	0.117491	0.145476	0.356353	0.152953	0.0939901	213204608	16.4	3652488	0.28	2788	NA	11377392	0.87	34612	NA	69468640	5.34	21364	NA	280	NA	125694136	9.67	2952908	0.22
Aves	Penelope_pileata	1118817	Chordata	Aves	Galliformes	Cracidae	GCA_013396635.1	0.2	1.25001e+09	NA	NA	1260	CRC_AvianBodyMasses	NA	7.13887	602	0.0446352	0.356578	0.125177	808	0.0436191	0.364895	0.119539	0.721111	0.133435	0.148955	0.731937	0.186111	0.0968249	152090444	12.25	4414600	0.35	14664	NA	12100836	0.97	34588	NA	43588144	3.51	56884	NA	NA	NA	90715152	7.31	1165576	0.09
Aves	Apteryx_haastii	8823	Chordata	Aves	Apterygiformes	Apterygidae	GCA_003342985.1	0.3	1.48417e+09	NA	NA	1692	CRC_AvianBodyMasses	NA	7.43367	257	0.00311845	0.0166925	0.186818	NA	NA	NA	NA	0.0598615	0.0277367	0.184852	0.0628299	0.0529965	0.134113	211009868	14.33	1562632	0.1	5844	NA	4918056	0.33	42868	NA	35404948	2.4	156592	0.01	NA	NA	167360400	11.37	1558528	0.1
Aves	Apteryx_owenii	8824	Chordata	Aves	Apterygiformes	Apterygidae	GCA_003342965.1	0.2	1.49608e+09	NA	NA	1243	CRC_AvianBodyMasses	NA	7.12528	298	0.00304908	0.0155757	0.195759	NA	NA	NA	NA	0.0598615	0.0252359	0.181795	0.0628299	0.0679904	0.136593	NA	NA	NA	NA	NA	NA	NA	NA	NA	NA	NA	NA	NA	NA	NA	NA	NA	NA	NA	NA
Aves	Apteryx_rowi	308060	Chordata	Aves	Apterygiformes	Apterygidae	GCA_003343035.1	0.2	1.4932e+09	NA	NA	NA	NA	NA	NA	469	0.00362477	0.0210019	0.172593	NA	NA	NA	NA	0.164404	0.0273857	0.188131	0.179684	0.05794	0.146485	233536692	15.77	1367440	0.09	9196	NA	4032556	0.27	155488	0.01	37179612	2.51	43320	NA	1404	NA	189708104	12.81	1039572	0.07
Aves	Casuarius_casuarius	8787	Chordata	Aves	Casuariiformes	Casuariidae	GCA_003342895.1	0.5	1.46912e+09	30	AnAge	44000	CRC_AvianBodyMasses	3.4012	10.6919	591	0.00882254	0.0551893	0.15986	NA	NA	NA	NA	0.283128	0.0513318	0.206852	0.29168	0.0930972	0.103344	NA	NA	NA	NA	NA	NA	NA	NA	NA	NA	NA	NA	NA	NA	NA	NA	NA	NA	NA	NA
Aves	Dromaius_novaehollandiae	8790	Chordata	Aves	Casuariiformes	Dromaiidae	GCA_003342905.1	0.4	1594140000	16.6	AnAge	34200	CRC_AvianBodyMasses	2.8094	10.44	599	0.0103993	0.0641032	0.162227	NA	NA	NA	NA	0.283128	0.0629837	0.193691	0.29168	0.0888028	0.100456	292369612	18.48	516784	0.03	2744	NA	25188528	1.59	13504	NA	18922012	1.19	83788	NA	NA	NA	246289844	15.57	1352408	0.08
Aves	Rhea_americana	8797	Chordata	Aves	Rheiformes	Rheidae	GCA_003343005.1	0.3	1.41082e+09	NA	NA	23000	CRC_AvianBodyMasses	NA	10.0432	491	0.00525498	0.0283176	0.185573	822	0.0374466	0.283524	0.132075	0.0936771	0.0776999	0.171073	0.090726	0.120303	0.110835	165608656	11.83	89488	NA	992	NA	3953328	0.28	87056	NA	30673900	2.19	607144	0.04	NA	NA	129387608	9.24	809140	0.05
Aves	Rhea_pennata	8795	Chordata	Aves	Rheiformes	Rheidae	GCA_003342835.1	0.5	1.41984e+09	NA	NA	23900	CRC_AvianBodyMasses	NA	10.0816	515	0.00550402	0.0312004	0.176409	NA	NA	NA	NA	0.0936771	0.083473	0.172218	0.090726	0.129131	0.108243	199814896	14.19	85616	NA	NA	NA	2795572	0.19	80036	NA	26139592	1.85	542084	0.03	NA	NA	168954872	12	1217124	0.08
Aves	Crypturellus_cinnamomeus	889801	Chordata	Aves	Tinamiformes	Tinamidae	GCA_003342915.1	1.9	1.36387e+09	NA	NA	422	CRC_AvianBodyMasses	NA	6.04501	522	0.00690491	0.045317	0.152369	NA	NA	NA	NA	0.0829175	0.111797	0.17239	0.14531	0.114126	0.0901279	189644624	14.02	95416	NA	7096	NA	4300696	0.31	43564	NA	24855220	1.83	56400	NA	NA	NA	156742296	11.59	3543936	0.26
Aves	Crypturellus_undulatus	48396	Chordata	Aves	Tinamiformes	Tinamidae	GCA_013389825.1	0.5	1.24209e+09	NA	NA	567	CRC_AvianBodyMasses	NA	6.34036	506	0.0057166	0.0384167	0.148805	NA	NA	NA	NA	0.0829175	0.0991774	0.163047	0.14531	0.131305	0.0888352	344561232	27.93	136356	0.01	13020	NA	7686376	0.62	88196	NA	38726296	3.14	69548	NA	2792	NA	289203276	23.45	8635372	0.7
Aves	Crypturellus_soui	458187	Chordata	Aves	Tinamiformes	Tinamidae	GCA_013389845.1	0.8	1.26864e+09	NA	NA	217	CRC_AvianBodyMasses	NA	5.3799	579	0.0124626	0.104867	0.118842	NA	NA	NA	NA	0.211882	0.118563	0.157344	0.265887	0.20791	0.0956372	299942456	23.81	139140	0.01	7796	NA	6262216	0.49	112988	NA	45496412	3.61	208164	0.01	15828	NA	244302064	19.39	3397848	0.26
Aves	Eudromia_elegans	8805	Chordata	Aves	Tinamiformes	Tinamidae	GCA_003342815.1	0.3	1212720000	NA	NA	694.5	CRC_AvianBodyMasses	NA	6.54319	611	0.0336565	0.255041	0.131965	811	0.0354971	0.269614	0.131659	0.397053	0.179222	0.149585	0.455555	0.206456	0.118176	86634640	7.2	93420	NA	6020	NA	777952	0.06	256	NA	21516268	1.78	45856	NA	936	NA	59807596	4.97	4386336	0.36
Aves	Nothoprocta_perdicaria	30464	Chordata	Aves	Tinamiformes	Tinamidae	GCA_003342845.1	0.2	1.17489e+09	NA	NA	458	CRC_AvianBodyMasses	NA	6.12687	603	0.0375132	0.317822	0.118032	793	0.0385058	0.34088	0.11296	0.397053	0.269423	0.134999	0.455555	0.240933	0.100055	122729640	10.53	162360	0.01	2352	NA	2181664	0.18	22404	NA	29100224	2.49	126884	0.01	152	NA	88450932	7.59	2682668	0.23
Mollusca	Nautilus_pompilius	34573	Mollusca	Cephalopoda	Nautilida	Nautilidae	GCA_018389105.1	2.3	8.88181e+08	NA	NA	NA	NA	NA	NA	621	0.214887	3.35494	0.0640509	NA	NA	NA	NA	0.80122	1.39867	0.0642943	0.804102	1.19003	0.0617323	217812420	24.69	27135600	3.07	289552	0.03	379808	0.04	8500	NA	586936	0.06	163592	0.01	NA	NA	188931212	21.41	317220	0.03
Mollusca	Octopus_sinensis	2607531	Mollusca	Cephalopoda	Octopoda	Octopodidae	GCA_006345805.1	5.2	3.29689e+09	NA	NA	NA	NA	NA	NA	528	0.172869	3.10376	0.0556965	NA	NA	NA	NA	0.454408	2.24717	0.0490511	0.440474	2.4003	0.0482903	1941197008	59.27	116400772	3.55	6168324	0.18	17971776	0.54	15538828	0.47	66015672	2.01	27698604	0.84	712144	0.02	1654269980	50.51	36420908	1.11
Mollusca	Sepia_pharaonis	158019	Mollusca	Cephalopoda	Sepiida	Sepiidae	GCA_903632075.3	0.4	5.79789e+09	NA	NA	NA	NA	NA	NA	580	0.163806	2.92417	0.0560179	NA	NA	NA	NA	0.454408	1.9981	0.0445259	0.440474	2.17779	0.0414032	5439448052	94.48	16602120	0.28	232092	NA	9923980	0.17	872632	0.01	5810944	0.1	451704	NA	40832	NA	5393503904	93.69	12009844	0.2
Mollusca	Archivesica_marissinica	2291877	Mollusca	Bivalvia	Venerida	Vesicomyidae	GCA_014843695.1	1.7	1.87531e+09	NA	NA	NA	NA	NA	NA	669	0.11139	2.10727	0.0528598	NA	NA	NA	NA	0.341531	2.0661	0.0564844	0.382575	1.85792	0.0476629	1222459992	65.63	16326916	0.87	337068	0.01	14232304	0.76	719268	0.03	15936180	0.85	5489320	0.29	118348	NA	1148462580	61.66	20837612	1.11
Mollusca	Cyclina_sinensis	120566	Mollusca	Bivalvia	Venerida	Veneridae	GCA_012932295.1	8.9	1.0989e+09	NA	NA	NA	NA	NA	NA	644	0.0900785	1.8127	0.0496929	NA	NA	NA	NA	0.281143	2.23132	0.0419271	0.312911	1.89318	0.042113	388288204	35.58	2509608	0.22	327076	0.02	3580488	0.32	1123484	0.1	3047904	0.27	988600	0.09	11616	NA	374037364	34.27	2662064	0.24
Mollusca	Mercenaria_mercenaria	6596	Mollusca	Bivalvia	Venerida	Veneridae	GCA_014805675.1	4	2.17032e+09	NA	NA	NA	NA	NA	NA	672	0.0731094	1.50499	0.0485781	NA	NA	NA	NA	0.281143	1.83384	0.0437624	0.312911	1.71742	0.0383234	1104056320	51.2	2958348	0.13	612368	0.02	9312516	0.43	12672756	0.58	12357968	0.57	3085000	0.14	39440	NA	1055695500	48.96	7322424	0.33
Mollusca	Lutraria_rhynchaena	1380851	Mollusca	Bivalvia	Venerida	Mactridae	GCA_008271625.1	1.5	6.6413e+08	NA	NA	NA	NA	NA	NA	707	0.128321	2.72553	0.047081	NA	NA	NA	NA	0.431543	2.58889	0.0343188	0.469086	2.66624	0.03119	183145160	27.77	1698336	0.25	108948	0.01	1128060	0.17	36112	NA	2456844	0.37	3526344	0.53	44712	NA	172232328	26.11	1913476	0.29
Mollusca	Sinonovacula_constricta	98310	Mollusca	Bivalvia	Cardiida	Solecurtidae	GCA_007844125.1	11	1.48345e+09	NA	NA	NA	NA	NA	NA	593	0.191373	3.02467	0.0632706	NA	NA	NA	NA	0.632461	1.38656	0.0615694	0.64343	1.20573	0.0839851	NA	NA	NA	NA	NA	NA	NA	NA	NA	NA	NA	NA	NA	NA	NA	NA	NA	NA	NA	NA
Mollusca	Megalonaias_nervosa	52375	Mollusca	Bivalvia	Unionida	Unionidae	GCA_016617855.1	1.4	2.86852e+09	NA	NA	NA	NA	NA	NA	506	0.0355751	0.420241	0.084654	NA	NA	NA	NA	0.0666023	0.965642	0.0994677	0.077982	0.882236	0.0945905	1478599756	51.9	10417552	0.36	118200	NA	65390296	2.29	1316644	0.04	40185644	1.41	3473504	0.12	38388	NA	1341225808	47.07	16433720	0.57
Mollusca	Potamilus_streckersoni	2493646	Mollusca	Bivalvia	Unionida	Unionidae	GCA_016746295.1	1.4	2.15628e+09	NA	NA	NA	NA	NA	NA	679	0.0872142	1.25858	0.069296	NA	NA	NA	NA	0.0666023	0.973026	0.10879	0.077982	1.04485	0.100464	649155620	30.3	4780388	0.22	21760	NA	10729244	0.5	1732032	0.08	16572760	0.77	2576004	0.12	93212	NA	605024800	28.24	7625420	0.35
Mollusca	Argopecten_irradians_irradians	158587	Mollusca	Bivalvia	Pectinida	Pectinidae	GCA_004382745.1	0.7	1.01717e+09	NA	NA	NA	NA	NA	NA	686	0.0625062	1.43298	0.0436196	NA	NA	NA	NA	0.191327	2.48618	0.0370027	0.212424	2.52051	0.0310033	503824708	49.88	1147404	0.11	276564	0.02	6761928	0.66	29016	NA	4155024	0.41	152792	0.01	8500	NA	488274384	48.34	3019096	0.29
Mollusca	Pecten_maximus	6579	Mollusca	Bivalvia	Pectinida	Pectinidae	GCA_902652985.1	3.2	1388760000	NA	NA	NA	NA	NA	NA	654	0.0435888	0.80788	0.0539545	NA	NA	NA	NA	0.191327	1.20269	0.0557853	0.212424	1.25645	0.0405548	481034544	34.88	4633592	0.33	300624	0.02	2958192	0.21	416668	0.03	3022540	0.21	1007496	0.07	4704	NA	460838092	33.41	7852636	0.56
Mollusca	Mizuhopecten_yessoensis	6573	Mollusca	Bivalvia	Pectinida	Pectinidae	GCA_002113885.2	2.9	1652820000	NA	NA	NA	NA	NA	NA	635	0.0649583	1.05178	0.0617602	NA	NA	NA	NA	0.268379	1.07854	0.0646381	0.300203	1.1012	0.0534788	695500572	42.53	3627184	0.22	236580	0.01	5295932	0.32	501912	0.03	8008844	0.48	1483056	0.09	55392	NA	669322552	40.93	6969120	0.42
Mollusca	Crassostrea_gigas	29159	Mollusca	Bivalvia	Ostreida	Ostreidae	GCA_902806645.1	3.1	635700000	NA	NA	NA	NA	NA	NA	622	0.109038	1.90906	0.0571161	NA	NA	NA	NA	0.284362	1.73107	0.0412233	0.319951	1.38478	0.0396737	246496724	39.05	1594260	0.25	305936	0.04	2852568	0.45	1656860	0.26	1262164	0.19	309816	0.04	1988	NA	236426964	37.45	2086168	0.33
Mollusca	Crassostrea_virginica	6565	Mollusca	Bivalvia	Ostreida	Ostreidae	GCA_002022765.4	21.2	8.3459e+08	NA	NA	NA	NA	NA	NA	498	0.0833439	1.62743	0.0512121	NA	NA	NA	NA	0.284362	1.55483	0.0433715	0.319951	1.50521	0.0394162	NA	NA	NA	NA	NA	NA	NA	NA	NA	NA	NA	NA	NA	NA	NA	NA	NA	NA	NA	NA
Mollusca	Mytilus_coruscus	42192	Mollusca	Bivalvia	Mytiloida	Mytilidae	GCA_017311375.1	1.8	1858200000	NA	NA	NA	NA	NA	NA	653	0.031632	0.51941	0.0608998	NA	NA	NA	NA	0.0669351	1.65507	0.0739897	0.0676509	1.84175	0.0607331	NA	NA	NA	NA	NA	NA	NA	NA	NA	NA	NA	NA	NA	NA	NA	NA	NA	NA	NA	NA
Mollusca	Mytilus_edulis	6550	Mollusca	Bivalvia	Mytiloida	Mytilidae	GCA_905397895.1	23.5	1564800000	NA	NA	NA	NA	NA	NA	494	0.0214558	0.28035	0.0765324	NA	NA	NA	NA	0.0198151	1.6068	0.102471	0.0211766	1.81412	0.115925	NA	NA	NA	NA	NA	NA	NA	NA	NA	NA	NA	NA	NA	NA	NA	NA	NA	NA	NA	NA
Mollusca	Mytilus_galloprovincialis	29158	Mollusca	Bivalvia	Mytiloida	Mytilidae	GCA_900618805.1	7.8	1877760000	NA	NA	NA	NA	NA	NA	516	0.016177	0.242726	0.066647	NA	NA	NA	NA	0.0198151	1.68449	0.0751605	0.0211766	1.78085	0.0829891	762499756	41.04	2384100	0.12	517148	0.02	7046348	0.37	43076616	2.31	6334536	0.34	121872	NA	660	NA	694938288	37.4	8080188	0.43
Mollusca	Perna_viridis	73031	Mollusca	Bivalvia	Mytiloida	Mytilidae	GCA_018327765.1	0.3	8.91637e+08	NA	NA	NA	NA	NA	NA	734	0.10949	2.10704	0.0519639	NA	NA	NA	NA	0.378492	2.06121	0.0445864	0.402268	1.76494	0.0433566	351829872	39.62	341116	0.03	41964	NA	1460304	0.16	28513768	3.21	3919224	0.44	4748	NA	NA	NA	316045080	35.59	1503668	0.16
Mollusca	Chrysomallon_squamiferum	216257	Mollusca	Gastropoda	NA	Peltospiridae	GCA_012295275.1	0.7	4.95541e+08	NA	NA	NA	NA	NA	NA	716	0.224648	3.62593	0.0619561	NA	NA	NA	NA	0.829413	1.60716	0.0559454	0.795104	1.45736	0.0604093	NA	NA	NA	NA	NA	NA	NA	NA	NA	NA	NA	NA	NA	NA	NA	NA	NA	NA	NA	NA
Mollusca	Haliotis_rubra	36100	Mollusca	Gastropoda	Lepetellida	Haliotidae	GCA_003918875.1	2	1.67398e+09	NA	NA	NA	NA	NA	NA	685	0.0551717	0.789645	0.0698691	NA	NA	NA	NA	0.170739	0.986878	0.0796993	0.203221	0.937072	0.0575999	742569376	44.65	12085868	0.72	368756	0.02	10014764	0.6	2510940	0.15	28305828	1.7	2432812	0.14	33768	NA	681144488	40.96	5671756	0.34
Mollusca	Haliotis_rufescens	6454	Mollusca	Gastropoda	Lepetellida	Haliotidae	GCA_003343065.1	4.1	1.81975e+09	NA	NA	NA	NA	NA	NA	657	0.0529995	0.764961	0.0692839	NA	NA	NA	NA	0.170739	0.971499	0.061432	0.203221	0.920872	0.0595538	712219296	39.41	10133968	0.56	566632	0.03	12071260	0.66	14232440	0.78	12120788	0.67	1499152	0.08	184040	0.01	653157884	36.14	8253132	0.45
Mollusca	Batillaria_attramentaria	370345	Mollusca	Gastropoda	NA	Batillariidae	GCA_018292915.1	3.7	8.74322e+08	NA	NA	NA	NA	NA	NA	657	0.141485	2.37414	0.0595941	NA	NA	NA	NA	0.608999	1.26576	0.055576	0.58996	1.18128	0.0597228	243554956	28.14	1686572	0.19	30056	NA	8196224	0.94	260144	0.03	13048748	1.5	3946600	0.45	26388	NA	210906828	24.37	5453396	0.63
Mollusca	Marisa_cornuarietis	75126	Mollusca	Gastropoda	Architaenioglossa	Ampullariidae	GCA_004794655.1	0.6	6.53702e+08	NA	NA	NA	NA	NA	NA	678	0.0363368	0.431543	0.0842022	NA	NA	NA	NA	0.0577705	1.426	0.105558	0.0514875	1.7346	0.100617	135046044	20.8	4114592	0.63	6296	NA	1765652	0.27	84728	0.01	15380292	2.36	166144	0.02	2504	NA	111386992	17.15	2138844	0.32
Mollusca	Pomacea_canaliculata	400727	Mollusca	Gastropoda	Architaenioglossa	Ampullariidae	GCA_003073045.1	0.4	5.38566e+08	NA	NA	NA	NA	NA	NA	679	0.0371614	0.440492	0.0843633	NA	NA	NA	NA	0.0577705	1.44496	0.142531	0.0514875	1.85069	0.083607	NA	NA	NA	NA	NA	NA	NA	NA	NA	NA	NA	NA	NA	NA	NA	NA	NA	NA	NA	NA
Mollusca	Achatina_immaculata	2605667	Mollusca	Gastropoda	Stylommatophora	Achatinidae	GCA_009760885.1	6.3	2.00669e+09	NA	NA	NA	NA	NA	NA	597	0.101964	1.80317	0.0565468	NA	NA	NA	NA	0.428242	1.41424	0.0507215	0.445036	1.47923	0.0485434	883250828	44.32	40468656	2.03	1615340	0.08	2009720	0.1	369088	0.01	196064672	9.83	6109496	0.3	53772	NA	627394116	31.48	9165968	0.45
Mollusca	Candidula_unifasciata	100452	Mollusca	Gastropoda	Stylommatophora	Geomitridae	GCA_905116865.2	7.8	1.64784e+09	NA	NA	NA	NA	NA	NA	589	0.0663107	1.0864	0.061037	NA	NA	NA	NA	0.18624	1.41449	0.0603728	0.22557	1.24524	0.0564619	756822084	46.25	17303460	1.05	1754644	0.1	3246076	0.19	1486888	0.09	51928788	3.17	398168	0.02	137428	NA	672425080	41.09	8141552	0.49
Mollusca	Cepaea_nemoralis	28835	Mollusca	Gastropoda	Stylommatophora	Helicidae	GCA_014155875.1	19.3	4.23099e+09	NA	NA	NA	NA	NA	NA	490	0.0565162	0.917355	0.0616078	NA	NA	NA	NA	0.18624	1.36703	0.0632126	0.22557	1.19433	0.0622307	2754447864	65.56	53465240	1.27	427756	0.01	41965268	0.99	1498056	0.03	284696072	6.77	2863024	0.06	284008	NA	2333290172	55.53	35958268	0.85
Insecta	Actias_luna	63976	Arthropoda	Insecta	Lepidoptera	Saturniidae	GCA_010014465.1	25.5	547680000	NA	NA	NA	NA	NA	NA	490	0.356938	2.44699	0.145868	510	0.350597	2.48824	0.140901	0.644061	1.50991	0.0770673	0.498717	1.09585	0.318175	258640232	47.73	1019652	0.18	18365600	3.38	1488572	0.27	4244	NA	6384692	1.17	2209448	0.4	NA	NA	228517636	42.17	650388	0.12
Insecta	Antheraea_mylitta	34739	Arthropoda	Insecta	Lepidoptera	Saturniidae	GCA_014332785.1	6	8.51131e+08	NA	NA	NA	NA	NA	NA	800	0.106261	2.64136	0.0402298	832	0.10395	2.73042	0.0380711	0.368872	2.57709	0.0520935	0.167304	4.55571	0.0450678	311839736	36.89	8796476	1.04	38362852	4.53	7821624	0.92	28924	NA	40401332	4.77	25128340	2.97	NA	NA	187924668	22.23	3375520	0.39
Insecta	Bombyx_mori	7091	Arthropoda	Insecta	Lepidoptera	Bombycidae	GCA_014905235.2	1	508560000	NA	NA	NA	NA	NA	NA	849	0.13709	2.95422	0.046405	881	0.133901	3.05634	0.0438108	0.368872	3.24265	0.0512297	0.167304	4.1254	0.0691259	146071988	28.93	5716172	1.13	5670632	1.12	4891000	0.96	412	NA	30041088	5.94	2865540	0.56	NA	NA	95419236	18.89	1467908	0.29
Insecta	Hyles_vespertilio	283848	Arthropoda	Insecta	Lepidoptera	Sphingidae	GCA_009982885.1	4.1	7.94234e+08	NA	NA	NA	NA	NA	NA	821	0.067758	1.55447	0.0435892	852	0.0662787	1.59837	0.0414663	0.228335	2.45302	0.0486013	0.137119	2.45394	0.0497436	NA	NA	NA	NA	NA	NA	NA	NA	NA	NA	NA	NA	NA	NA	NA	NA	NA	NA	NA	NA
Insecta	Manduca_sexta	7130	Arthropoda	Insecta	Lepidoptera	Sphingidae	GCA_014839805.1	8.8	420540000	NA	NA	NA	NA	NA	NA	779	0.064979	1.54968	0.0419305	808	0.0632038	1.58421	0.0398961	0.228335	2.52206	0.0528185	0.137119	2.5704	0.0506632	91541276	21.92	3261352	0.78	8136640	1.94	1725364	0.41	1976	NA	9075444	2.17	16306404	3.9	NA	NA	52572760	12.58	461336	0.11
Insecta	Dendrolimus_punctatus	238572	Arthropoda	Insecta	Lepidoptera	Lasiocampidae	GCA_012273795.1	9.9	7.49056e+08	NA	NA	NA	NA	NA	NA	771	0.120563	2.81273	0.0428632	801	0.117911	2.89554	0.0407217	0.437902	2.91466	0.0483482	0.201829	3.00392	0.0638983	NA	NA	NA	NA	NA	NA	NA	NA	NA	NA	NA	NA	NA	NA	NA	NA	NA	NA	NA	NA
Insecta	Arctia_plantaginis	874455	Arthropoda	Insecta	Lepidoptera	Erebidae	GCA_902825455.1	1.2	7.0539e+08	NA	NA	NA	NA	NA	NA	844	0.0977801	2.36401	0.0413619	876	0.0954144	2.43339	0.0392105	0.349755	2.67866	0.0439327	0.175416	3.44452	0.0528136	236677208	33.79	10223448	1.45	14638528	2.08	7035268	1	38880	NA	48983580	6.99	22798740	3.25	236	NA	131666828	18.79	1291700	0.18
Insecta	Spodoptera_exigua	7107	Arthropoda	Insecta	Lepidoptera	Noctuidae	GCA_011316535.1	1.5	5.46605e+08	NA	NA	NA	NA	NA	NA	835	0.0384787	1.0759	0.0357642	865	0.0376046	1.09951	0.0342011	0.0883263	2.77772	0.037121	0.0741498	3.45416	0.0290009	166782984	30.72	2622116	0.48	10447692	1.92	11112260	2.04	5780	NA	34455456	6.34	29704044	5.47	NA	NA	77577048	14.29	858588	0.15
Insecta	Spodoptera_frugiperda	7108	Arthropoda	Insecta	Lepidoptera	Noctuidae	GCA_011064685.1	19.3	5.94377e+08	NA	NA	NA	NA	NA	NA	641	0.0235057	0.600235	0.0391608	670	0.02287	0.60874	0.0375694	0.0883263	2.49683	0.0475942	0.0741498	1.92161	0.0705374	147555300	25	2629184	0.44	9875208	1.67	2374904	0.4	9628	NA	24640536	4.17	23947424	4.05	1228	NA	83601760	14.16	475428	0.08
Insecta	Cnaphalocrocis_medinalis	437488	Arthropoda	Insecta	Lepidoptera	Crambidae	GCA_014851415.1	3.8	6.45427e+08	NA	NA	NA	NA	NA	NA	805	0.11556	2.28212	0.0506373	837	0.112883	2.35275	0.0479794	0.459465	2.51292	0.0459447	0.213682	1.84378	0.103249	NA	NA	NA	NA	NA	NA	NA	NA	NA	NA	NA	NA	NA	NA	NA	NA	NA	NA	NA	NA
Insecta	Galleria_mellonella	7137	Arthropoda	Insecta	Lepidoptera	Pyralidae	GCA_004355975.1	2.4	5.907e+08	NA	NA	NA	NA	NA	NA	841	0.0914737	2.27211	0.0402593	871	0.0894748	2.34621	0.0381358	0.385177	2.44637	0.045341	0.187684	2.81108	0.0566997	NA	NA	NA	NA	NA	NA	NA	NA	NA	NA	NA	NA	NA	NA	NA	NA	NA	NA	NA	NA
Insecta	Plodia_interpunctella	58824	Arthropoda	Insecta	Lepidoptera	Pyralidae	GCA_001368715.1	2.1	4.68117e+08	NA	NA	NA	NA	NA	NA	842	0.116981	2.36452	0.0494733	874	0.114311	2.42704	0.0470989	0.385177	2.81368	0.0458192	0.187684	2.76909	0.0816067	68491100	14.79	1735764	0.37	11076132	2.39	2851256	0.61	NA	NA	6719296	1.45	6498404	1.4	NA	NA	39214680	8.46	395568	0.08
Insecta	Bicyclus_anynana	110368	Arthropoda	Insecta	Lepidoptera	Nymphalidae	GCA_900239965.1	1.8	479220000	0.5	NA	NA	NA	-0.693147	NA	847	0.0600668	1.24025	0.0484312	880	0.0585291	1.26126	0.0464051	0.156759	2.91966	0.0605623	0.121628	2.1307	0.0821843	144809808	30.47	5465556	1.15	21343560	4.49	2036508	0.42	NA	NA	22066924	4.64	9434168	1.98	NA	NA	83125348	17.49	1337744	0.28
Insecta	Lasiommata_megera	111917	Arthropoda	Insecta	Lepidoptera	Nymphalidae	GCA_928268935.1	0.8	5.97023e+08	NA	NA	NA	NA	NA	NA	860	0.0537336	1.22125	0.043999	892	0.0526114	1.24867	0.0421341	0.156759	2.31767	0.0645607	0.121628	2.68992	0.0491428	143025260	24.12	5713560	0.96	6819520	1.15	3353420	0.56	2768	NA	29995872	5.05	10772932	1.81	200	NA	85015268	14.33	1351720	0.22
Insecta	Erebia_aethiops	447833	Arthropoda	Insecta	Lepidoptera	Nymphalidae	GCA_923060345.1	0.8	5.78882e+08	NA	NA	NA	NA	NA	NA	861	0.0161393	0.255146	0.0632549	888	0.0159423	0.258571	0.0616552	0.0249811	2.3005	0.103028	0.0274351	3.70206	0.0664553	184835132	32.15	6441636	1.12	19014388	3.3	4775608	0.83	77780	0.01	19726240	3.43	8298056	1.44	252	NA	124903936	21.72	1597236	0.27
Insecta	Erebia_ligea	111903	Arthropoda	Insecta	Lepidoptera	Nymphalidae	GCA_917051295.1	0.7	6.19023e+08	NA	NA	NA	NA	NA	NA	857	0.0148247	0.200795	0.0738301	887	0.0146265	0.204214	0.0716233	0.0249811	2.04182	0.111131	0.0274351	2.42866	0.0932933	213602736	34.75	7781796	1.26	23907956	3.88	3595012	0.58	44760	NA	21331384	3.47	9009836	1.46	5556	NA	145548996	23.67	2377440	0.38
Insecta	Maniola_hyperantus	2795564	Arthropoda	Insecta	Lepidoptera	Nymphalidae	GCA_902806685.2	0.6	4.99809e+08	NA	NA	NA	NA	NA	NA	867	0.0349249	0.6785	0.0514736	895	0.0344451	0.688169	0.0500533	0.106989	1.88357	0.0732597	0.0811011	2.63383	0.0540622	157514000	31.73	2602832	0.52	15986464	3.22	6408924	1.29	16892	NA	19386452	3.9	7038740	1.41	NA	NA	105006616	21.15	1067080	0.21
Insecta	Melanargia_galathea	111923	Arthropoda	Insecta	Lepidoptera	Nymphalidae	GCA_920104075.1	0.5	7.39743e+08	NA	NA	NA	NA	NA	NA	866	0.0458959	0.828295	0.0554101	897	0.0449269	0.839404	0.0535225	0.140007	1.8816	0.0672707	0.115528	1.68962	0.0949827	300552592	40.91	8823364	1.2	36868772	5.01	6616688	0.9	123856	0.01	26890464	3.66	9312024	1.26	468	NA	208950140	28.44	2966816	0.4
Insecta	Elymnias_hypermnestra	366056	Arthropoda	Insecta	Lepidoptera	Nymphalidae	GCA_015832385.1	1.6	6.92005e+08	NA	NA	NA	NA	NA	NA	853	0.0832222	2.43151	0.0342265	881	0.0810799	2.50389	0.0323816	0.253674	2.96619	0.0519461	0.166797	4.96751	0.0323548	247559016	36.14	22907736	3.34	15366608	2.24	4796072	0.7	51332	NA	71916576	10.5	14497080	2.11	NA	NA	116177844	16.96	1845768	0.26
Insecta	Boloria_selene	191398	Arthropoda	Insecta	Lepidoptera	Nymphalidae	GCA_905231865.2	0.4	4.8986e+08	NA	NA	NA	NA	NA	NA	868	0.0363297	0.588709	0.0617108	899	0.0363076	0.599734	0.0605394	0.0672669	2.53791	0.0879956	0.0602668	2.87648	0.0712589	132857172	27.31	2577192	0.52	16472660	3.38	8450860	1.73	10712	NA	21917364	4.5	17553452	3.6	NA	NA	65107100	13.38	767832	0.15
Insecta	Fabriciana_adippe	405009	Arthropoda	Insecta	Lepidoptera	Nymphalidae	GCA_905404265.1	0.3	5.92628e+08	NA	NA	NA	NA	NA	NA	859	0.0216725	0.390811	0.0554553	890	0.0213512	0.399677	0.0534212	0.0672669	1.68467	0.0796294	0.0602668	2.07248	0.0680409	186153572	31.63	4325328	0.73	63407392	10.77	4375460	0.74	12232	NA	14221988	2.41	16459472	2.79	NA	NA	81747328	13.89	1604372	0.27
Insecta	Heliconius_sara	33443	Arthropoda	Insecta	Lepidoptera	Nymphalidae	GCA_917862395.1	0.3	4.28103e+08	NA	NA	NA	NA	NA	NA	848	0.072083	1.87481	0.0384481	880	0.0701298	1.922	0.0364879	0.174923	3.7814	0.0527362	0.123809	4.50745	0.0548991	73978592	17.4	5508940	1.29	21086716	4.96	2583992	0.6	12532	NA	9078864	2.13	21149012	4.97	NA	NA	14398088	3.38	160448	0.03
Insecta	Limenitis_camilla	270466	Arthropoda	Insecta	Lepidoptera	Nymphalidae	GCA_905147385.1	0.6	5.32458e+08	NA	NA	NA	NA	NA	NA	860	0.0799348	2.09051	0.038237	892	0.0780896	2.14547	0.0363974	0.23303	2.81151	0.0556192	0.145789	4.53818	0.0421154	142261504	26.9	5362628	1.01	27510064	5.2	4812212	0.91	11736	NA	21004368	3.97	5011352	0.94	NA	NA	76571336	14.48	1977808	0.37
Insecta	Hypolimnas_misippus	124412	Arthropoda	Insecta	Lepidoptera	Nymphalidae	GCA_008963455.1	0.4	5.00603e+08	NA	NA	NA	NA	NA	NA	855	0.0370855	0.995985	0.037235	886	0.0367212	1.03219	0.0355759	0.155635	2.10698	0.0518333	0.108826	2.4811	0.0462016	120256676	24.24	1649716	0.33	19680440	3.96	1882308	0.37	152	NA	15746036	3.17	8915156	1.79	NA	NA	71608172	14.43	774696	0.15
Insecta	Mellicta_athalia	113330	Arthropoda	Insecta	Lepidoptera	Nymphalidae	GCA_905220545.2	0.6	7.43602e+08	NA	NA	NA	NA	NA	NA	851	0.0618949	1.48038	0.0418101	879	0.0604584	1.51104	0.040011	0.155635	3.14419	0.0600068	0.108826	3.47437	0.0497041	285866820	38.71	14450592	1.95	34201976	4.63	10357048	1.4	12500	NA	29910664	4.05	19176952	2.59	1508	NA	173853908	23.54	3901672	0.52
Insecta	Nymphalis_io	171585	Arthropoda	Insecta	Lepidoptera	Nymphalidae	GCA_905147045.1	0.6	4.70803e+08	NA	NA	NA	NA	NA	NA	859	0.00979235	0.164497	0.0595289	NA	NA	NA	NA	0.0298293	1.74347	0.0849867	0.0174588	3.1891	0.0535476	109457888	23.41	2470524	0.52	2362068	0.5	3282648	0.7	4984	NA	29756676	6.36	24554044	5.25	NA	NA	46261504	9.89	765440	0.16
Insecta	Nymphalis_urticae	111881	Arthropoda	Insecta	Lepidoptera	Nymphalidae	GCA_905147175.2	0.7	4.81269e+08	NA	NA	NA	NA	NA	NA	862	0.00905417	0.161065	0.0562142	NA	NA	NA	NA	0.0298293	1.85524	0.0936945	0.0174588	2.44762	0.0727315	100722156	21.07	1260500	0.26	2390016	0.5	4476728	0.93	9380	NA	23550716	4.92	17885328	3.74	NA	NA	50601996	10.58	547492	0.11
Insecta	Nymphalis_polychloros	171594	Arthropoda	Insecta	Lepidoptera	Nymphalidae	GCA_905220585.2	0.4	4.87676e+08	NA	NA	NA	NA	NA	NA	867	0.0154491	0.287898	0.0536618	901	0.0271227	0.620563	0.0437065	0.0473549	2.10988	0.0780036	0.0313935	2.54437	0.0733236	113683636	23.47	4716996	0.97	6848388	1.41	3328444	0.68	11444	NA	20322552	4.19	19838684	4.09	NA	NA	57675820	11.9	941308	0.19
Insecta	Vanessa_atalanta	42275	Arthropoda	Insecta	Lepidoptera	Nymphalidae	GCA_905147765.2	0.3	4.54178e+08	NA	NA	NA	NA	NA	NA	836	0.00534661	0.114549	0.0466752	NA	NA	NA	NA	0.0188579	1.89441	0.0637037	0.0159845	2.03185	0.0387758	62969412	13.96	814516	0.18	5138464	1.13	1707088	0.37	6340	NA	12710120	2.81	13920432	3.08	212	NA	28008260	6.2	663980	0.14
Insecta	Vanessa_tameamea	334116	Arthropoda	Insecta	Lepidoptera	Nymphalidae	GCA_002938995.1	0.6	4.38067e+08	NA	NA	NA	NA	NA	NA	827	0.00755112	0.104824	0.0720358	NA	NA	NA	NA	0.0188579	1.66286	0.0954587	0.0159845	2.12445	0.101521	NA	NA	NA	NA	NA	NA	NA	NA	NA	NA	NA	NA	NA	NA	NA	NA	NA	NA	NA	NA
Insecta	Vanessa_cardui	171605	Arthropoda	Insecta	Lepidoptera	Nymphalidae	GCA_905220365.1	0.2	5.19993e+08	NA	NA	NA	NA	NA	NA	867	0.015871	0.457938	0.0346575	899	0.0239133	0.68668	0.0348245	0.0461077	3.07733	0.0589561	0.0374739	3.73786	0.0416791	110524152	21.4	3533192	0.68	12643996	2.44	2379364	0.46	62032	0.01	23777536	4.6	21917248	4.24	NA	NA	45709912	8.85	500872	0.09
Insecta	Danaus_chrysippus	151541	Arthropoda	Insecta	Lepidoptera	Nymphalidae	GCA_004959915.1	1.9	3.96038e+08	NA	NA	NA	NA	NA	NA	794	0.0180041	0.576666	0.0312211	822	0.0178899	0.594538	0.0300904	0.0729075	1.81588	0.0460758	0.0541785	4.18084	0.0187532	159764940	40.5	4240684	1.07	5559016	1.4	1804664	0.45	11316	NA	11673608	2.95	3283984	0.83	NA	NA	132574888	33.6	616780	0.15
Insecta	Danaus_plexippus	13037	Arthropoda	Insecta	Lepidoptera	Nymphalidae	GCA_018135715.1	0.8	283620000	NA	NA	NA	NA	NA	NA	835	0.0254178	0.646332	0.0393262	862	0.0251153	0.662023	0.0379373	0.0729075	2.25207	0.0544787	0.0541785	2.75717	0.0414511	32139812	11.41	662476	0.23	1257728	0.44	1684624	0.59	852	NA	7802840	2.77	1458732	0.51	NA	NA	19058320	6.76	214240	0.07
Insecta	Delias_pasithoe	152616	Arthropoda	Insecta	Lepidoptera	Pieridae	GCA_010014985.1	5.1	3.65517e+08	NA	NA	NA	NA	NA	NA	805	0.078608	1.79098	0.043891	837	0.0771304	1.84851	0.0417257	0.172656	3.18688	0.0684312	0.100459	5.09822	0.0463717	60756776	16.73	2395360	0.65	2237816	0.61	124356	0.03	872	NA	12910892	3.55	9788824	2.69	NA	NA	32722132	9.01	576524	0.15
Insecta	Pieris_rapae	64459	Arthropoda	Insecta	Lepidoptera	Pieridae	GCA_001856805.1	0.3	3.03414e+08	NA	NA	NA	NA	NA	NA	847	0.0675787	1.73745	0.0388954	878	0.06626	1.79521	0.0369094	0.172656	3.20204	0.055026	0.100459	5.91908	0.0313848	53566520	17.78	2561840	0.85	1600792	0.53	1509772	0.5	NA	NA	8776768	2.91	3838712	1.27	NA	NA	34594252	11.48	684384	0.22
Insecta	Epargyreus_clarus_clarus	2201626	Arthropoda	Insecta	Lepidoptera	Hesperiidae	GCA_014595695.2	11.2	5.21903e+08	NA	NA	NA	NA	NA	NA	677	0.125665	2.50646	0.0501364	707	0.123074	2.59901	0.047354	0.459428	2.43104	0.0513023	0.223589	2.04446	0.0765363	132237580	25.51	4678844	0.9	5340696	1.03	3146552	0.6	41204	NA	13789700	2.66	22108212	4.26	152	NA	82088228	15.83	1043992	0.2
Insecta	Hyposmocoma_kahamanoa	1477025	Arthropoda	Insecta	Lepidoptera	Cosmopterigidae	GCA_003589595.1	0.8	8.91112e+08	NA	NA	NA	NA	NA	NA	798	0.132858	2.94125	0.0451707	829	0.129844	3.03735	0.042749	0.521073	2.30568	0.0500458	0.249765	2.87244	0.0616026	NA	NA	NA	NA	NA	NA	NA	NA	NA	NA	NA	NA	NA	NA	NA	NA	NA	NA	NA	NA
Insecta	Plutella_xylostella	51655	Arthropoda	Insecta	Lepidoptera	Plutellidae	GCA_902505585.1	1.2	4.05678e+08	NA	NA	NA	NA	NA	NA	833	0.176056	3.09633	0.0568596	863	0.171368	3.16477	0.0541484	0.564733	2.23475	0.0532624	0.278444	1.68785	0.137263	NA	NA	NA	NA	NA	NA	NA	NA	NA	NA	NA	NA	NA	NA	NA	NA	NA	NA	NA	NA
Insecta	Eumeta_japonica	151549	Arthropoda	Insecta	Lepidoptera	Psychidae	GCA_005406025.1	3.7	8.8588e+08	NA	NA	NA	NA	NA	NA	786	0.173233	3.89878	0.0444325	817	0.168332	4.01299	0.0419467	0.618134	2.72964	0.0472535	0.305316	3.83525	0.046782	278268512	31.53	30001484	3.39	7890460	0.89	3062784	0.34	80952	NA	21732444	2.46	2584788	0.29	704	NA	211409932	23.95	1504964	0.17
Insecta	Hydropsyche_tenuis	577407	Arthropoda	Insecta	Trichoptera	Hydropsychidae	GCA_009617725.1	0.5	2.83797e+08	NA	NA	NA	NA	NA	NA	811	0.164814	3.79917	0.0433815	835	0.161193	3.9173	0.041149	0.683157	3.37463	0.0362581	0.763805	1.14714	0.0488096	42766640	15.17	2202612	0.78	1408	NA	19708	NA	516	NA	309104	0.1	102500	0.03	NA	NA	39688928	14.08	441864	0.15
Insecta	Plectrocnemia_conspersa	161770	Arthropoda	Insecta	Trichoptera	Polycentropodidae	GCA_009617715.1	1	4.8596e+08	NA	NA	NA	NA	NA	NA	799	0.178178	4.06349	0.0438484	828	0.173366	4.18829	0.0413931	0.594688	2.79191	0.0543825	0.696676	1.60489	0.0382716	116394384	24.12	6020724	1.24	21172	NA	471516	0.09	696	NA	3433548	0.71	304900	0.06	NA	NA	104907032	21.74	1234796	0.25
Insecta	Stenopsyche_tienmushanensis	1560151	Arthropoda	Insecta	Trichoptera	Stenopsychidae	GCA_008973525.1	2.4	5.52285e+08	NA	NA	NA	NA	NA	NA	789	0.142611	3.42326	0.0416596	814	0.139515	3.5822	0.0389467	0.594688	3.10233	0.0394802	0.696676	1.35931	0.0355648	NA	NA	NA	NA	NA	NA	NA	NA	NA	NA	NA	NA	NA	NA	NA	NA	NA	NA	NA	NA
Insecta	Aedes_aegypti	7159	Arthropoda	Insecta	Diptera	Culicidae	GCA_002204515.1	46.6	1222500000	NA	NA	NA	NA	NA	NA	425	0.126044	2.24253	0.0562062	448	0.124018	2.37471	0.0522243	NA	NA	NA	NA	NA	NA	NA	NA	NA	NA	NA	NA	NA	NA	NA	NA	NA	NA	NA	NA	NA	NA	NA	NA	NA	NA
Insecta	Aedes_albopictus	7160	Arthropoda	Insecta	Diptera	Culicidae	GCA_001876365.2	87.7	2.72578e+09	NA	NA	NA	NA	NA	NA	94	0.100697	1.8291	0.0550529	100	0.0987212	1.95067	0.0506089	NA	NA	NA	NA	NA	NA	1824740248	67.56	19850832	0.73	12812580	0.47	29079020	1.07	NA	NA	84276032	3.12	358296	0.01	NA	NA	1666687240	61.71	11676248	0.43
Insecta	Anopheles_albimanus	7167	Arthropoda	Insecta	Diptera	Culicidae	GCA_013758885.1	0.9	2.14735e+08	NA	NA	NA	NA	NA	NA	743	0.101252	1.6467	0.0614881	772	0.0988909	1.70288	0.0580726	0.408369	1.13312	0.098595	0.247917	1.3159	0.0582972	NA	NA	NA	NA	NA	NA	NA	NA	NA	NA	NA	NA	NA	NA	NA	NA	NA	NA	NA	NA
Insecta	Anopheles_atroparvus	41427	Arthropoda	Insecta	Diptera	Culicidae	GCA_000473505.1	1.6	234720000	NA	NA	NA	NA	NA	NA	757	0.0772873	1.49576	0.0516709	787	0.0764962	1.56991	0.0487266	0.340865	1.47655	0.0675152	0.172652	2.1022	0.0463392	48153692	17.83	80152	0.02	68600	0.02	1860560	0.68	NA	NA	711804	0.26	NA	NA	NA	NA	44784752	16.58	647824	0.23
Insecta	Anopheles_coluzzii	1518534	Arthropoda	Insecta	Diptera	Culicidae	GCA_004136515.2	37.7	3.10104e+08	NA	NA	NA	NA	NA	NA	391	0.0119419	0.201944	0.0591348	NA	NA	NA	NA	0.0167723	1.05352	0.0716217	0.0140548	1.45113	0.0959596	NA	NA	NA	NA	NA	NA	NA	NA	NA	NA	NA	NA	NA	NA	NA	NA	NA	NA	NA	NA
Insecta	Anopheles_gambiae	7165	Arthropoda	Insecta	Diptera	Culicidae	GCA_001542645.1	5.1	3.61342e+08	NA	NA	NA	NA	NA	NA	590	0.0240825	0.381728	0.063088	NA	NA	NA	NA	0.0167723	1.14909	0.0765339	0.0140548	1.67822	0.0902679	95431776	27.03	477220	0.13	111988	0.03	2106352	0.59	NA	NA	906028	0.25	NA	NA	NA	NA	91080032	25.8	750156	0.21
Insecta	Anopheles_epiroticus	199890	Arthropoda	Insecta	Diptera	Culicidae	GCA_000349105.1	0.8	2.76321e+08	NA	NA	NA	NA	NA	NA	774	0.0356041	1.02404	0.0347684	802	0.0471252	1.2139	0.0388213	0.167096	2.04196	0.0453524	0.0906708	3.06037	0.0307214	NA	NA	NA	NA	NA	NA	NA	NA	NA	NA	NA	NA	NA	NA	NA	NA	NA	NA	NA	NA
Insecta	Anopheles_funestus	62324	Arthropoda	Insecta	Diptera	Culicidae	GCA_003951495.1	47.9	5.43856e+08	NA	NA	NA	NA	NA	NA	398	0.0392669	1.21571	0.0322996	413	0.0396415	1.22338	0.0324034	NA	NA	NA	NA	NA	NA	135742692	25.44	426888	0.08	34092	NA	3245896	0.6	NA	NA	257116	0.04	NA	NA	NA	NA	131027408	24.56	751292	0.14
Insecta	Anopheles_stephensi	30069	Arthropoda	Insecta	Diptera	Culicidae	GCA_013141755.1	4.2	234720000	NA	NA	NA	NA	NA	NA	734	0.0404011	0.903126	0.0447347	762	0.0407122	0.93282	0.0436442	0.230646	1.58103	0.058044	0.12009	2.42926	0.0390856	59308700	20.14	58856	0.01	884	NA	2715508	0.92	NA	NA	1079112	0.36	NA	NA	NA	NA	54975024	18.67	479316	0.16
Insecta	Culicoides_sonorensis	179676	Arthropoda	Insecta	Diptera	Ceratopogonidae	GCA_900002565.1	52.5	2.59306e+08	NA	NA	NA	NA	NA	NA	372	0.318856	5.83942	0.054604	388	0.313343	5.8076	0.0539539	NA	NA	NA	NA	NA	NA	45153844	17.81	315968	0.12	1428	NA	155144	0.06	NA	NA	521916	0.2	2484	NA	NA	NA	43180452	17.03	976452	0.38
Insecta	Bactrocera_oleae	104688	Arthropoda	Insecta	Diptera	Tephritidae	GCA_001188975.4	0.6	5.92755e+08	NA	NA	NA	NA	NA	NA	820	0.158438	3.71407	0.0426589	849	0.155786	3.87525	0.0402002	0.522527	3.62419	0.0416371	0.606922	1.53089	0.0505396	175596820	30.15	9800080	1.68	4628900	0.79	5369360	0.92	NA	NA	3695592	0.63	NA	NA	NA	NA	150249772	25.8	1853116	0.31
Insecta	Drosophila_albomicans	7291	Arthropoda	Insecta	Diptera	Drosophilidae	GCA_009650485.1	1.7	2.06538e+08	NA	NA	NA	NA	NA	NA	837	0.0579377	1.45039	0.0399463	866	0.0564918	1.44758	0.039025	0.210262	2.45594	0.0517643	0.158378	2.30995	0.0281219	19932704	9.94	702124	0.35	1621908	0.8	3146852	1.56	NA	NA	1550548	0.77	NA	NA	NA	NA	12790892	6.37	120380	0.06
Insecta	Drosophila_innubila	198719	Arthropoda	Insecta	Diptera	Drosophilidae	GCA_004354385.2	2.1	2.07088e+08	NA	NA	NA	NA	NA	NA	852	0.040806	1.08331	0.037668	876	0.0409674	1.12913	0.0362823	0.210262	1.79537	0.048336	0.158378	1.95797	0.0294717	62028456	30.19	91264	0.04	213200	0.1	197092	0.09	1452	NA	657816	0.32	22892	0.01	NA	NA	60668072	29.52	176668	0.08
Insecta	Drosophila_hydei	7224	Arthropoda	Insecta	Diptera	Drosophilidae	GCA_003285905.2	3	205380000	NA	NA	NA	NA	NA	NA	838	0.0558814	1.44389	0.0387019	864	0.0590325	1.58655	0.037208	0.171105	2.93028	0.0510861	0.129104	3.0081	0.033362	NA	NA	NA	NA	NA	NA	NA	NA	NA	NA	NA	NA	NA	NA	NA	NA	NA	NA	NA	NA
Insecta	Drosophila_novamexicana	47314	Arthropoda	Insecta	Diptera	Drosophilidae	GCA_003285875.3	2.4	244500000	NA	NA	NA	NA	NA	NA	821	0.00601236	0.14119	0.0425834	NA	NA	NA	NA	0.0486404	1.12615	0.0583076	0.03362	1.08346	0.0349461	NA	NA	NA	NA	NA	NA	NA	NA	NA	NA	NA	NA	NA	NA	NA	NA	NA	NA	NA	NA
Insecta	Drosophila_virilis	7244	Arthropoda	Insecta	Diptera	Drosophilidae	GCA_007989325.2	2	332520000	NA	NA	0.00167	AnimalTraits	NA	-6.39493	848	0.00764488	0.184377	0.0414632	NA	NA	NA	NA	0.0486404	1.26921	0.055873	0.03362	1.47037	0.0251529	NA	NA	NA	NA	NA	NA	NA	NA	NA	NA	NA	NA	NA	NA	NA	NA	NA	NA	NA	NA
Insecta	Drosophila_lacertosa	119604	Arthropoda	Insecta	Diptera	Drosophilidae	GCA_004143845.1	1.7	1.92378e+08	NA	NA	NA	NA	NA	NA	851	0.041646	0.799452	0.0520932	878	0.0514166	1.01368	0.0507229	0.161701	1.66785	0.0734223	0.12105	1.82162	0.0364985	23335064	12.51	242032	0.12	NA	NA	3458080	1.85	NA	NA	5367488	2.87	NA	NA	NA	NA	14137080	7.58	130384	0.06
Insecta	Drosophila_micromelanica	189258	Arthropoda	Insecta	Diptera	Drosophilidae	GCA_004143825.1	1.6	1.95655e+08	NA	NA	NA	NA	NA	NA	850	0.0133364	0.240958	0.0553474	NA	NA	NA	NA	0.0633573	1.32583	0.0801582	0.0478732	1.64606	0.04784	42778356	22.54	796320	0.41	2610316	1.37	4377408	2.3	NA	NA	2884440	1.52	NA	NA	NA	NA	30111988	15.87	1997884	1.05
Insecta	Drosophila_nigromelanica	499227	Arthropoda	Insecta	Diptera	Drosophilidae	GCA_004149445.1	1.7	2.0256e+08	NA	NA	NA	NA	NA	NA	848	0.0101533	0.197383	0.0514394	NA	NA	NA	NA	0.0633573	0.890037	0.0827957	0.0478732	1.25365	0.0392621	42812852	21.78	592904	0.3	906856	0.46	4267168	2.17	NA	NA	4155708	2.11	NA	NA	NA	NA	32079876	16.32	810340	0.41
Insecta	Drosophila_ananassae	7217	Arthropoda	Insecta	Diptera	Drosophilidae	GCA_003285975.3	1.8	185820000	NA	NA	NA	NA	NA	NA	858	0.0179166	0.465288	0.0385064	883	0.0178454	0.479494	0.0372171	0.0693532	2.30121	0.0600381	0.0677915	1.81209	0.0288364	NA	NA	NA	NA	NA	NA	NA	NA	NA	NA	NA	NA	NA	NA	NA	NA	NA	NA	NA	NA
Insecta	Drosophila_bipectinata	42026	Arthropoda	Insecta	Diptera	Drosophilidae	GCA_000236285.2	2	195600000	NA	NA	NA	NA	NA	NA	849	0.0209397	0.552312	0.0379127	875	0.0206324	0.56034	0.0368212	0.0693532	2.64216	0.0550646	0.0677915	2.07047	0.0285564	59580208	29.44	1146928	0.56	1698532	0.83	8693560	4.29	NA	NA	9096420	4.49	NA	NA	NA	NA	38546516	19.04	398252	0.19
Insecta	Drosophila_asahinai	154832	Arthropoda	Insecta	Diptera	Drosophilidae	GCA_008042795.1	2.6	2.34643e+08	NA	NA	NA	NA	NA	NA	791	0.00320597	0.0837034	0.0383015	NA	NA	NA	NA	0.0163409	1.32978	0.0966561	0.0197163	1.33542	0.0232595	59842528	26.22	1900080	0.83	2149576	0.94	7048188	3.08	NA	NA	5635604	2.46	NA	NA	NA	NA	42384400	18.57	724680	0.31
Insecta	Drosophila_lacteicornis	67531	Arthropoda	Insecta	Diptera	Drosophilidae	GCA_008044355.1	2.5	244500000	NA	NA	NA	NA	NA	NA	807	0.0034387	0.0936086	0.0367348	NA	NA	NA	NA	0.0163409	1.3868	0.0726199	0.0197163	1.64622	0.025036	59519164	24.61	1349104	0.55	1478848	0.61	6372132	2.63	4408	NA	3464156	1.43	NA	NA	NA	NA	45565808	18.84	1284708	0.53
Insecta	Drosophila_rufa	67533	Arthropoda	Insecta	Diptera	Drosophilidae	GCA_008044435.1	2.4	254280000	NA	NA	NA	NA	NA	NA	799	0.00360521	0.0799692	0.0450825	NA	NA	NA	NA	0.0207421	1.07131	0.0663563	0.0278453	0.86191	0.0280046	72514560	28.83	2407820	0.95	1802804	0.71	9001820	3.57	6444	NA	6583016	2.61	NA	NA	NA	NA	51314016	20.4	1398640	0.55
Insecta	Drosophila_tani	137070	Arthropoda	Insecta	Diptera	Drosophilidae	GCA_008042535.1	6.1	195600000	NA	NA	NA	NA	NA	NA	807	0.00768982	0.192954	0.0398531	NA	NA	NA	NA	0.0335328	1.33335	0.07137	0.0411165	1.48099	0.0279123	36982420	19.1	1239704	0.64	1262272	0.65	2499280	1.29	NA	NA	2660424	1.37	NA	NA	NA	NA	28726716	14.84	594024	0.3
Insecta	Drosophila_triauraria	67534	Arthropoda	Insecta	Diptera	Drosophilidae	GCA_014170255.2	2.9	244500000	NA	NA	NA	NA	NA	NA	800	0.0119057	0.272743	0.0436515	NA	NA	NA	NA	0.0702457	1.30397	0.0764422	0.0736512	0.991567	0.0298959	NA	NA	NA	NA	NA	NA	NA	NA	NA	NA	NA	NA	NA	NA	NA	NA	NA	NA	NA	NA
Insecta	Drosophila_pectinifera	359927	Arthropoda	Insecta	Diptera	Drosophilidae	GCA_008042775.1	1.8	293400000	NA	NA	NA	NA	NA	NA	862	0.0172921	0.498434	0.0346929	890	0.021628	0.567228	0.0381292	0.102456	1.47932	0.0532875	0.095695	1.59924	0.0255354	51782632	28.68	201744	0.11	481036	0.26	2220864	1.23	NA	NA	1538200	0.85	NA	NA	NA	NA	44870904	24.85	2469884	1.36
Insecta	Drosophila_birchii	46829	Arthropoda	Insecta	Diptera	Drosophilidae	GCA_008042755.1	2.3	195600000	NA	NA	NA	NA	NA	NA	856	0.00849394	0.208087	0.0408191	NA	NA	NA	NA	0.0294872	2.15559	0.0663313	0.0279644	1.90479	0.0294928	36417256	18.82	538200	0.27	495236	0.25	6891112	3.56	NA	NA	8230184	4.25	NA	NA	128	NA	19972772	10.32	289624	0.14
Insecta	Drosophila_mayri	137074	Arthropoda	Insecta	Diptera	Drosophilidae	GCA_008042485.1	2.3	254280000	NA	NA	NA	NA	NA	NA	851	0.00881669	0.227005	0.0388392	NA	NA	NA	NA	0.0294872	2.64197	0.0515183	0.0279644	2.24305	0.0304811	81845936	32.52	765664	0.3	582872	0.23	15474204	6.14	NA	NA	6271064	2.49	NA	NA	NA	NA	56973924	22.64	1778208	0.7
Insecta	Drosophila_truncata	137078	Arthropoda	Insecta	Diptera	Drosophilidae	GCA_008042515.1	1.9	2.0904e+08	NA	NA	NA	NA	NA	NA	855	0.0136721	0.41299	0.033105	NA	NA	NA	NA	0.048824	2.34893	0.0626498	0.0467481	2.80368	0.0211414	42408884	20.89	759396	0.37	934488	0.46	4555208	2.24	NA	NA	5305112	2.61	NA	NA	NA	NA	30138836	14.84	715844	0.35
Insecta	Drosophila_bunnanda	244254	Arthropoda	Insecta	Diptera	Drosophilidae	GCA_008042815.1	2	215160000	NA	NA	NA	NA	NA	NA	863	0.0136538	0.334814	0.0407802	NA	NA	NA	NA	0.049764	2.17173	0.0602916	0.0454048	1.94777	0.0264001	28920596	13.58	342448	0.16	5161484	2.42	4049856	1.9	7140	NA	1403672	0.65	NA	NA	NA	NA	16417088	7.71	1538908	0.72
Insecta	Drosophila_serrata	7274	Arthropoda	Insecta	Diptera	Drosophilidae	GCA_002093755.1	3.2	205380000	NA	NA	NA	NA	NA	NA	833	0.0143125	0.40673	0.0351893	859	0.0199021	0.558881	0.0356106	0.049764	2.51336	0.0662378	0.0454048	2.53213	0.0194477	NA	NA	NA	NA	NA	NA	NA	NA	NA	NA	NA	NA	NA	NA	NA	NA	NA	NA	NA	NA
Insecta	Drosophila_jambulina	111875	Arthropoda	Insecta	Diptera	Drosophilidae	GCA_008042695.1	2.6	205380000	NA	NA	NA	NA	NA	NA	856	0.0107601	0.294628	0.0365208	NA	NA	NA	NA	0.0463885	2.00539	0.0574769	0.047058	1.7717	0.0266878	34568824	17.01	504724	0.24	1413692	0.69	6367152	3.13	320	NA	4688444	2.3	NA	NA	NA	NA	19065304	9.38	2529188	1.24
Insecta	Drosophila_seguyi	73917	Arthropoda	Insecta	Diptera	Drosophilidae	GCA_008042675.1	2.3	215160000	NA	NA	NA	NA	NA	NA	850	0.0139705	0.292564	0.0477521	NA	NA	NA	NA	0.0392814	2.36635	0.0716043	0.0405317	2.06019	0.0321852	47496828	21.97	1083704	0.5	1025756	0.47	7645636	3.53	NA	NA	9106748	4.21	NA	NA	NA	NA	27552424	12.75	1082560	0.5
Insecta	Drosophila_vulcana	132243	Arthropoda	Insecta	Diptera	Drosophilidae	GCA_008042555.1	5.2	224940000	NA	NA	NA	NA	NA	NA	831	0.015017	0.300641	0.0499499	859	0.0222	0.453832	0.0489168	0.0392814	2.18277	0.06267	0.0405317	2.67885	0.0623496	35862804	15.83	1159208	0.51	385280	0.17	4363388	1.92	NA	NA	4066380	1.79	NA	NA	NA	NA	25670900	11.33	217648	0.09
Insecta	Drosophila_bocki	103765	Arthropoda	Insecta	Diptera	Drosophilidae	GCA_008042715.1	2.3	1.88834e+08	NA	NA	NA	NA	NA	NA	830	0.00440652	0.116704	0.037758	NA	NA	NA	NA	0.0212746	1.56055	0.0634808	0.0228545	1.40132	0.0330044	26283516	14.07	715440	0.38	975040	0.52	3409652	1.82	1444	NA	3127604	1.67	476	NA	NA	NA	17652600	9.45	401260	0.21
Insecta	Drosophila_kikkawai	30033	Arthropoda	Insecta	Diptera	Drosophilidae	GCA_000224215.2	2.4	205380000	NA	NA	NA	NA	NA	NA	836	0.00342267	0.112328	0.0304703	NA	NA	NA	NA	0.0212746	1.51213	0.0652599	0.0228545	1.59403	0.0258819	31035480	15.59	424696	0.21	1031048	0.51	4696848	2.35	NA	NA	3216732	1.61	NA	NA	NA	NA	20965992	10.53	700164	0.35
Insecta	Drosophila_kanapiae	137072	Arthropoda	Insecta	Diptera	Drosophilidae	GCA_008042475.1	3	166260000	NA	NA	NA	NA	NA	NA	849	0.0323381	0.563264	0.057412	878	0.0316125	0.556184	0.0568382	0.108073	1.62142	0.0789606	0.0989806	1.64913	0.0367729	17316148	9.4	342704	0.18	351968	0.19	1830048	0.99	NA	NA	4047652	2.19	NA	NA	NA	NA	10327392	5.6	416384	0.22
Insecta	Drosophila_biarmipes	125945	Arthropoda	Insecta	Diptera	Drosophilidae	GCA_005234255.1	4.9	195600000	NA	NA	NA	NA	NA	NA	826	0.0185092	0.384788	0.0481023	NA	NA	NA	NA	0.0719586	1.90126	0.0773844	0.059051	1.71377	0.0332171	NA	NA	NA	NA	NA	NA	NA	NA	NA	NA	NA	NA	NA	NA	NA	NA	NA	NA	NA	NA
Insecta	Drosophila_suzukii	28584	Arthropoda	Insecta	Diptera	Drosophilidae	GCF_013340165.1	4.1	342300000	NA	NA	NA	NA	NA	NA	832	0.0151195	0.372924	0.0405432	862	0.0231465	0.559879	0.0413419	0.0719586	1.6414	0.0552895	0.059051	1.69311	0.0302146	NA	NA	NA	NA	NA	NA	NA	NA	NA	NA	NA	NA	NA	NA	NA	NA	NA	NA	NA	NA
Insecta	Drosophila_takahashii	29030	Arthropoda	Insecta	Diptera	Drosophilidae	GCA_000224235.2	1.6	195600000	NA	NA	NA	NA	NA	NA	859	0.0257856	0.562163	0.0458685	888	0.0252449	0.5578	0.0452579	0.107033	1.76288	0.0636135	0.0873488	1.82339	0.0383991	62428068	28.35	843084	0.38	4659376	2.11	6361572	2.88	NA	NA	4082796	1.85	NA	NA	NA	NA	44553288	20.23	1927952	0.87
Insecta	Drosophila_erecta	7220	Arthropoda	Insecta	Diptera	Drosophilidae	GCA_003286155.2	1.2	156480000	NA	NA	NA	NA	NA	NA	851	0.00870721	0.139229	0.0625387	NA	NA	NA	NA	0.0191833	1.87303	0.0893857	0.0207193	1.67371	0.0644442	NA	NA	NA	NA	NA	NA	NA	NA	NA	NA	NA	NA	NA	NA	NA	NA	NA	NA	NA	NA
Insecta	Drosophila_orena	7233	Arthropoda	Insecta	Diptera	Drosophilidae	GCA_005876975.1	6.4	273840000	NA	NA	NA	NA	NA	NA	793	0.0114264	0.142256	0.0803224	829	0.0419271	0.902979	0.046432	0.0191833	2.27215	0.0863002	0.0207193	2.24527	0.0694172	NA	NA	NA	NA	NA	NA	NA	NA	NA	NA	NA	NA	NA	NA	NA	NA	NA	NA	NA	NA
Insecta	Drosophila_mauritiana	7226	Arthropoda	Insecta	Diptera	Drosophilidae	GCA_004382145.1	1.2	146700000	NA	NA	NA	NA	NA	NA	788	0.00310814	0.0655545	0.0474131	NA	NA	NA	NA	0.011354	1.93474	0.0725774	0.0133968	1.25481	0.0448804	NA	NA	NA	NA	NA	NA	NA	NA	NA	NA	NA	NA	NA	NA	NA	NA	NA	NA	NA	NA
Insecta	Drosophila_sechellia	7238	Arthropoda	Insecta	Diptera	Drosophilidae	GCA_004382195.1	1.4	166260000	NA	NA	NA	NA	NA	NA	833	0.00513433	0.0783949	0.0654932	NA	NA	NA	NA	0.0103473	2.33973	0.0855092	0.0112681	2.04273	0.0552642	NA	NA	NA	NA	NA	NA	NA	NA	NA	NA	NA	NA	NA	NA	NA	NA	NA	NA	NA	NA
Insecta	Drosophila_simulans	7240	Arthropoda	Insecta	Diptera	Drosophilidae	GCA_004382185.1	2.8	146700000	NA	NA	NA	NA	NA	NA	778	0.00300404	0.0629735	0.0477032	NA	NA	NA	NA	0.0103473	2.0171	0.0795157	0.0112681	1.4193	0.0397791	NA	NA	NA	NA	NA	NA	NA	NA	NA	NA	NA	NA	NA	NA	NA	NA	NA	NA	NA	NA
Insecta	Drosophila_melanogaster	7227	Arthropoda	Insecta	Diptera	Drosophilidae	GCA_003401745.1	1.4	176040000	0.3	AnAge	0.00095	AnimalTraits	-1.20397	-6.95905	859	0.00960683	0.200333	0.0479542	NA	NA	NA	NA	0.024228	2.56115	0.0772109	0.0286107	2.05869	0.0415366	NA	NA	NA	NA	NA	NA	NA	NA	NA	NA	NA	NA	NA	NA	NA	NA	NA	NA	NA	NA
Insecta	Drosophila_eugracilis	29029	Arthropoda	Insecta	Diptera	Drosophilidae	GCA_000236325.2	1.5	224940000	NA	NA	NA	NA	NA	NA	861	0.0361097	1.21291	0.0297712	887	0.0351172	1.21292	0.0289526	0.120476	3.28963	0.0512877	0.0897602	3.74717	0.0190654	30559868	16.06	726108	0.38	2617948	1.37	6059372	3.18	NA	NA	2568592	1.35	NA	NA	NA	NA	16143240	8.48	2444608	1.28
Insecta	Drosophila_ficusphila	30025	Arthropoda	Insecta	Diptera	Drosophilidae	GCA_000220665.2	1.9	185820000	NA	NA	NA	NA	NA	NA	855	0.0373382	1.08888	0.0342904	884	0.0366809	1.09101	0.0336211	0.141648	2.89628	0.0480343	0.109852	2.4958	0.0235382	18088576	9.78	466284	0.25	640660	0.34	2388904	1.29	NA	NA	3110560	1.68	NA	NA	NA	NA	10620000	5.74	862168	0.46
Insecta	Drosophila_elegans	30023	Arthropoda	Insecta	Diptera	Drosophilidae	GCA_000224195.2	1.3	195600000	NA	NA	NA	NA	NA	NA	857	0.0305872	0.642271	0.0476236	882	0.0299787	0.642044	0.0466926	0.153173	1.5222	0.0617884	0.119044	1.41432	0.0408203	43071900	20.79	456824	0.22	976616	0.47	12185460	5.88	NA	NA	3484596	1.68	NA	NA	NA	NA	24821424	11.98	1146980	0.55
Insecta	Drosophila_azteca	7249	Arthropoda	Insecta	Diptera	Drosophilidae	GCA_005876895.1	2.2	195600000	NA	NA	NA	NA	NA	NA	839	0.0209625	0.370043	0.0566488	866	0.025022	0.53456	0.0468086	0.105433	1.14872	0.0833107	0.0853567	1.24343	0.0494853	NA	NA	NA	NA	NA	NA	NA	NA	NA	NA	NA	NA	NA	NA	NA	NA	NA	NA	NA	NA
Insecta	Drosophila_persimilis	7234	Arthropoda	Insecta	Diptera	Drosophilidae	GCA_003286085.2	3.4	176040000	NA	NA	NA	NA	NA	NA	697	0.00224237	0.0419586	0.0534425	NA	NA	NA	NA	0.0134641	0.870377	0.06828	0.0138219	0.797805	0.0652825	NA	NA	NA	NA	NA	NA	NA	NA	NA	NA	NA	NA	NA	NA	NA	NA	NA	NA	NA	NA
Insecta	Drosophila_pseudoobscura	7237	Arthropoda	Insecta	Diptera	Drosophilidae	GCA_009870125.2	2.4	156480000	NA	NA	NA	NA	NA	NA	740	0.00295671	0.0522467	0.0565914	NA	NA	NA	NA	0.0134641	0.957687	0.075299	0.0138219	0.856322	0.0525324	38490108	19.42	369728	0.18	816972	0.41	5887248	2.97	NA	NA	3660284	1.84	NA	NA	NA	NA	27354392	13.8	401484	0.2
Insecta	Drosophila_bifasciata	7218	Arthropoda	Insecta	Diptera	Drosophilidae	GCA_009664405.1	1.8	195600000	NA	NA	NA	NA	NA	NA	828	0.0214311	0.332597	0.0644358	853	0.0214315	0.337754	0.0634531	0.104936	1.02569	0.0989245	0.0934412	1.13328	0.0381754	35002288	18.08	509448	0.26	1723644	0.89	7035524	3.63	14768	NA	4197240	2.16	5280	NA	NA	NA	21035548	10.86	480836	0.24
Insecta	Drosophila_obscura	7282	Arthropoda	Insecta	Diptera	Drosophilidae	GCA_002217835.1	6.3	2.2595e+08	NA	NA	NA	NA	NA	NA	815	0.0168685	0.256516	0.0657601	843	0.0168573	0.2653	0.0635405	0.104936	0.787788	0.0955367	0.0934412	0.796771	0.0460831	57070660	25.98	1078808	0.49	1810124	0.82	9381276	4.27	NA	NA	5919996	2.69	NA	NA	NA	NA	36685932	16.7	2194524	0.99
Insecta	Drosophila_guanche	7266	Arthropoda	Insecta	Diptera	Drosophilidae	GCA_900245975.1	1.9	1.76041e+08	NA	NA	NA	NA	NA	NA	850	0.0277393	0.541946	0.0511845	876	0.0271067	0.539179	0.0502741	0.124695	1.37062	0.0866003	0.108847	1.37129	0.0413718	41427936	24.17	247388	0.14	3118112	1.81	675488	0.39	NA	NA	1384172	0.8	NA	NA	NA	NA	35802892	20.89	199884	0.11
Insecta	Scaptodrosophila_lebanonensis	7225	Arthropoda	Insecta	Diptera	Drosophilidae	GCA_003285725.2	2.7	215160000	NA	NA	NA	NA	NA	NA	831	0.0896061	1.85701	0.048253	856	0.0889588	1.91952	0.0463442	0.366697	2.04673	0.0660192	0.271418	1.90143	0.0389266	NA	NA	NA	NA	NA	NA	NA	NA	NA	NA	NA	NA	NA	NA	NA	NA	NA	NA	NA	NA
Insecta	Lucilia_cuprina	7375	Arthropoda	Insecta	Diptera	Calliphoridae	GCA_000699065.2	0.8	616140000	NA	NA	NA	NA	NA	NA	827	0.0533572	1.67685	0.0318199	853	0.0529067	1.75016	0.0302297	0.109857	6.66657	0.0397998	0.494436	0.912127	0.0243978	154439084	33.96	2422416	0.53	1383884	0.3	3304428	0.72	NA	NA	821656	0.18	NA	NA	NA	NA	145270628	31.95	1236072	0.27
Insecta	Sarcophaga_peregrina	7386	Arthropoda	Insecta	Diptera	Sarcophagidae	GCA_014635995.1	1.2	6.84502e+08	NA	NA	NA	NA	NA	NA	812	0.0595896	1.88501	0.0316124	830	0.0583325	1.95112	0.0298969	0.109857	7.72942	0.0408894	0.494436	0.964719	0.0290588	NA	NA	NA	NA	NA	NA	NA	NA	NA	NA	NA	NA	NA	NA	NA	NA	NA	NA	NA	NA
Insecta	Hermetia_illucens	343691	Arthropoda	Insecta	Diptera	Stratiomyidae	GCA_009835165.1	8.8	1154040000	NA	NA	NA	NA	NA	NA	762	0.192492	4.42614	0.0434898	788	0.188858	4.58887	0.0411556	0.589983	2.55921	0.0553698	0.709899	2.03251	0.0386871	NA	NA	NA	NA	NA	NA	NA	NA	NA	NA	NA	NA	NA	NA	NA	NA	NA	NA	NA	NA
Insecta	Proctacanthus_coquilletti	1717472	Arthropoda	Insecta	Diptera	Asilidae	GCA_001932985.1	0.7	2.58676e+08	NA	NA	NA	NA	NA	NA	846	0.181549	4.41855	0.041088	878	0.177767	4.58788	0.038747	0.589983	3.41286	0.0394348	0.709899	2.86186	0.023839	36759512	14.49	493892	0.19	4587972	1.8	461324	0.18	NA	NA	182420	0.07	NA	NA	NA	NA	30395212	11.98	638692	0.25
Insecta	Contarinia_nasturtii	265458	Arthropoda	Insecta	Diptera	Cecidomyiidae	GCA_009176525.2	2.6	2.30811e+08	NA	NA	NA	NA	NA	NA	750	0.0886054	1.93154	0.0458728	778	0.0856096	1.98005	0.043236	0.240071	3.15795	0.0546403	0.525824	0.688646	0.0590103	30821416	13.68	1359860	0.6	25276	0.01	269256	0.11	NA	NA	262888	0.11	NA	NA	NA	NA	28679408	12.73	224728	0.09
Insecta	Sitodiplosis_mosellana	263140	Arthropoda	Insecta	Diptera	Cecidomyiidae	GCA_009176505.1	2.8	2.58527e+08	NA	NA	NA	NA	NA	NA	746	0.0803201	1.72885	0.0464586	775	0.0790593	1.77213	0.0446127	0.240071	1.7811	0.0720029	0.525824	0.727553	0.0457234	NA	NA	NA	NA	NA	NA	NA	NA	NA	NA	NA	NA	NA	NA	NA	NA	NA	NA	NA	NA
Insecta	Ctenocephalides_felis	7515	Arthropoda	Insecta	Siphonaptera	Pulicidae	GCA_003426905.1	27.3	459660000	NA	NA	NA	NA	NA	NA	577	0.317698	5.88884	0.0539491	600	0.309814	5.83421	0.053103	0.876103	3.70844	0.0437984	0.884926	1.50877	0.0722332	NA	NA	NA	NA	NA	NA	NA	NA	NA	NA	NA	NA	NA	NA	NA	NA	NA	NA	NA	NA
Insecta	Aethina_tumida	116153	Arthropoda	Insecta	Coleoptera	Nitidulidae	GCA_001937115.1	10.1	2.89463e+08	NA	NA	NA	NA	NA	NA	743	0.206565	4.59543	0.04495	771	0.201646	4.71892	0.0427313	0.7892	2.3262	0.0528608	0.796376	1.72886	0.0400207	53364020	18.63	2592116	0.9	161964	0.05	3242360	1.13	65340	0.02	937780	0.32	NA	NA	NA	NA	45610404	15.92	754056	0.26
Insecta	Anoplophora_glabripennis	217634	Arthropoda	Insecta	Coleoptera	Cerambycidae	GCA_000390285.2	1.9	8.61473e+08	NA	NA	NA	NA	NA	NA	829	0.130954	3.23756	0.0404482	861	0.127173	3.3826	0.0375964	0.688026	2.77507	0.0338806	0.712329	1.81286	0.0268451	433581724	50.88	39070584	4.58	585520	0.06	57570640	6.75	114528	0.01	12212832	1.43	NA	NA	NA	NA	315116936	36.97	8910684	1.04
Insecta	Callosobruchus_maculatus	64391	Arthropoda	Insecta	Coleoptera	Chrysomelidae	GCA_900659725.1	5.5	1212720000	NA	NA	NA	NA	NA	NA	715	0.178621	4.28925	0.0416438	744	0.174161	4.43052	0.0393092	0.625428	2.56766	0.0516994	0.637043	2.3061	0.0349552	NA	NA	NA	NA	NA	NA	NA	NA	NA	NA	NA	NA	NA	NA	NA	NA	NA	NA	NA	NA
Insecta	Ophraella_communa	38162	Arthropoda	Insecta	Coleoptera	Chrysomelidae	GCA_902651945.1	11.9	586800000	NA	NA	NA	NA	NA	NA	728	0.177721	4.18383	0.0424781	753	0.174037	4.37799	0.0397528	0.625428	2.44549	0.0570181	0.637043	1.39216	0.0537963	NA	NA	NA	NA	NA	NA	NA	NA	NA	NA	NA	NA	NA	NA	NA	NA	NA	NA	NA	NA
Insecta	Listronotus_bonariensis	292309	Arthropoda	Insecta	Coleoptera	Curculionidae	GCA_014170235.1	10.8	1.35224e+09	NA	NA	NA	NA	NA	NA	698	0.115518	2.87558	0.0401722	731	0.11305	3.03734	0.0372201	0.577858	2.08214	0.0449793	0.599591	1.63823	0.0355238	NA	NA	NA	NA	NA	NA	NA	NA	NA	NA	NA	NA	NA	NA	NA	NA	NA	NA	NA	NA
Insecta	Sitophilus_oryzae	7048	Arthropoda	Insecta	Coleoptera	Curculionidae	GCA_002938485.2	3.4	9.38447e+08	NA	NA	NA	NA	NA	NA	823	0.160931	3.74684	0.0429511	856	0.156795	3.88775	0.0403306	0.577858	2.6168	0.043658	0.599591	1.58048	0.0438195	617198496	66.34	56778232	6.1	3850952	0.41	42893008	4.61	2040	NA	77180972	8.29	3700	NA	352	NA	436343784	46.9	145456	0.01
Insecta	Cryptolaemus_montrouzieri	559131	Arthropoda	Insecta	Coleoptera	Coccinellidae	GCA_013387265.1	1	782400000	NA	NA	NA	NA	NA	NA	844	0.11527	2.6761	0.0430738	875	0.112627	2.79328	0.0403206	0.611718	1.77331	0.0514898	0.596938	1.20859	0.0395884	NA	NA	NA	NA	NA	NA	NA	NA	NA	NA	NA	NA	NA	NA	NA	NA	NA	NA	NA	NA
Insecta	Harmonia_axyridis	115357	Arthropoda	Insecta	Coleoptera	Coccinellidae	GCA_011033045.1	3.6	459660000	NA	NA	NA	NA	NA	NA	768	0.110565	2.51069	0.0440376	797	0.106893	2.58508	0.0413498	0.368392	1.71352	0.0736429	0.354574	1.76234	0.0419701	159418292	34.92	16083668	3.52	112252	0.02	5942624	1.3	NA	NA	13060092	2.86	18776	NA	NA	NA	123519088	27.05	681792	0.14
Insecta	Propylea_japonica	158624	Arthropoda	Insecta	Coleoptera	Coccinellidae	GCA_013421045.1	28.3	1.03609e+09	NA	NA	NA	NA	NA	NA	567	0.0836101	2.03753	0.041035	587	0.0813623	2.11543	0.0384614	0.368392	2.04107	0.0543048	0.354574	1.78347	0.0250923	631110240	61.33	25157944	2.44	7795516	0.75	19043304	1.85	10528	NA	32127160	3.12	28348	NA	NA	NA	544218124	52.88	2729316	0.26
Insecta	Hycleus_cichorii	1270216	Arthropoda	Insecta	Coleoptera	Meloidae	GCA_013841215.1	0.4	1.25852e+08	NA	NA	NA	NA	NA	NA	725	0.0135401	0.25193	0.0537453	NA	NA	NA	NA	0.040343	1.50532	0.0768056	0.0794168	0.754974	0.0414399	75304780	60.35	169996	0.13	820	NA	966636	0.77	NA	NA	22716	0.01	628	NA	NA	NA	73358428	58.79	785556	0.62
Insecta	Hycleus_phaleratus	1248972	Arthropoda	Insecta	Coleoptera	Meloidae	GCA_013841185.1	0.4	1.15812e+08	NA	NA	NA	NA	NA	NA	671	0.0140811	0.237563	0.0592733	881	0.22246	5.41793	0.0410599	0.040343	1.44885	0.0842465	0.0794168	0.514001	0.0934252	73427776	63.85	161552	0.14	10564	NA	147744	0.12	NA	NA	24520	0.02	3040	NA	NA	NA	72728948	63.24	351408	0.3
Insecta	Marronus_borbonicus	2654888	Arthropoda	Insecta	Coleoptera	Scarabaeidae	GCA_902655005.2	3.1	5.40147e+08	NA	NA	NA	NA	NA	NA	749	0.00969979	0.119039	0.081484	NA	NA	NA	NA	0.0315699	0.884269	0.152378	0.0413306	0.565105	0.116776	122620916	22.86	13997936	2.6	12552	NA	2488356	0.46	2316	NA	2914752	0.54	NA	NA	NA	NA	102415632	19.09	789372	0.14
Insecta	Oryctes_borbonicus	1629725	Arthropoda	Insecta	Coleoptera	Scarabaeidae	GCA_902654985.2	2.8	5.24147e+08	NA	NA	NA	NA	NA	NA	729	0.0077796	0.118252	0.065788	NA	NA	NA	NA	0.0315699	0.959329	0.087277	0.0413306	0.535821	0.0844563	85273384	16.38	11410024	2.19	35564	NA	2573472	0.49	6496	NA	2500120	0.48	2216	NA	NA	NA	68459676	13.15	285816	0.05
Insecta	Trypoxylus_dichotomus	273928	Arthropoda	Insecta	Coleoptera	Scarabaeidae	GCA_014905495.1	1.3	9.00752e+08	NA	NA	NA	NA	NA	NA	832	0.0492866	1.15861	0.0425392	875	0.146262	3.5966	0.0406668	0.230854	1.70185	0.0609597	0.310402	1.11121	0.0355945	NA	NA	NA	NA	NA	NA	NA	NA	NA	NA	NA	NA	NA	NA	NA	NA	NA	NA	NA	NA
Insecta	Protaetia_brevitarsis	348688	Arthropoda	Insecta	Coleoptera	Scarabaeidae	GCA_004143645.1	44.4	1.39033e+09	NA	NA	NA	NA	NA	NA	459	0.0969851	2.46701	0.0393128	473	0.098184	2.60153	0.0377408	NA	NA	NA	NA	NA	NA	761601744	55.16	49336072	3.57	872768	0.06	10698144	0.77	56576	NA	54864212	3.97	157940	0.01	NA	NA	636954304	46.13	8661728	0.62
Insecta	Nicrophorus_vespilloides	110193	Arthropoda	Insecta	Coleoptera	Silphidae	GCA_001412225.1	2	2.42174e+08	NA	NA	NA	NA	NA	NA	816	0.262411	5.46816	0.0479888	849	0.255357	5.52019	0.0462587	0.807349	2.79543	0.0457548	0.812918	2.6194	0.0366642	39357256	16.43	1479592	0.61	NA	NA	56224	0.02	NA	NA	1125592	0.46	NA	NA	NA	NA	36511244	15.24	184604	0.07
Insecta	Photinus_pyralis	7054	Arthropoda	Insecta	Coleoptera	Lampyridae	GCA_008802855.1	10.4	5.76512e+08	NA	NA	NA	NA	NA	NA	757	0.254253	5.61615	0.0452717	792	0.247975	5.70729	0.0434488	0.863881	4.26202	0.0311155	0.858355	3.14572	0.0259506	NA	NA	NA	NA	NA	NA	NA	NA	NA	NA	NA	NA	NA	NA	NA	NA	NA	NA	NA	NA
Insecta	Andricus_quercuslanigera	2302820	Arthropoda	NA	Hymenoptera	Cynipidae	GCA_010014905.1	0.8	1.62377e+09	NA	NA	NA	NA	NA	NA	624	0.107085	2.48748	0.0430496	642	0.105413	2.57342	0.0409623	0.499111	1.67386	0.0546383	0.43343	1.89047	0.0286688	859964220	53.33	12460856	0.77	1289052	0.07	21815124	1.35	68276	NA	26109328	1.61	724480	0.04	13804	NA	786258364	48.76	11224936	0.69
Insecta	Leptopilina_boulardi	63433	Arthropoda	Insecta	Hymenoptera	Figitidae	GCA_011634795.1	4.3	361860000	NA	NA	NA	NA	NA	NA	799	0.142152	2.92521	0.0485953	828	0.139719	3.07881	0.0453807	0.499111	1.74983	0.0683475	0.43343	1.16232	0.0584162	222812252	61.84	1663952	0.46	549892	0.15	13965552	3.87	96248	0.02	3491972	0.96	39460	0.01	6292	NA	201592296	55.95	1406588	0.39
Insecta	Nasonia_vitripennis	7425	Arthropoda	Insecta	Hymenoptera	Pteromalidae	GCA_009193385.2	1.7	332520000	NA	NA	NA	NA	NA	NA	817	0.118439	2.6921	0.043995	848	0.119803	2.88263	0.0415602	0.516453	1.87656	0.0542205	0.453343	1.87567	0.0334215	125649284	37.94	755192	0.22	628668	0.18	3416856	1.03	40872	0.01	4947960	1.49	23452	NA	NA	NA	115415000	34.85	421284	0.12
Insecta	Trichogramma_brassicae	86971	Arthropoda	Insecta	Hymenoptera	Trichogrammatidae	GCA_902806795.1	5.1	244500000	NA	NA	NA	NA	NA	NA	598	0.0186445	0.297659	0.0626369	781	0.226863	4.60892	0.0492226	0.0271675	1.65178	0.106936	0.0403123	0.869085	0.0575885	60343248	24.85	423704	0.17	146080	0.06	1929868	0.79	18048	NA	1812348	0.74	74376	0.03	304	NA	55558156	22.88	380364	0.15
Insecta	Trichogramma_pretiosum	7493	Arthropoda	Insecta	Hymenoptera	Trichogrammatidae	GCA_000599845.3	4.8	185820000	NA	NA	NA	NA	NA	NA	602	0.0269577	0.482584	0.055861	NA	NA	NA	NA	0.0271675	1.6151	0.0782988	0.0403123	1.00952	0.0601716	23739788	12.91	159912	0.08	NA	NA	211300	0.11	11956	NA	293912	0.15	NA	NA	NA	NA	23015136	12.52	47572	0.02
Insecta	Aphidius_gifuensis	684658	Arthropoda	Insecta	Hymenoptera	Braconidae	GCA_014905175.1	6.1	1.95783e+08	NA	NA	NA	NA	NA	NA	785	0.20751	4.35925	0.0476022	813	0.203556	4.54659	0.0447711	0.584091	2.79173	0.0595231	0.55346	1.34351	0.085317	50250464	25.84	159652	0.08	121564	0.06	851188	0.43	33764	0.01	70908	0.03	122212	0.06	8664	NA	47544520	24.45	1337992	0.68
Insecta	Chelonus_insularis	460826	Arthropoda	Insecta	Hymenoptera	Braconidae	GCA_013357705.1	0.7	1.70108e+08	NA	NA	NA	NA	NA	NA	840	0.174762	3.66435	0.0476925	872	0.170295	3.80171	0.0447944	0.584091	2.55507	0.0596819	0.55346	1.43735	0.0503871	13757940	8.19	201712	0.12	80588	0.04	545644	0.32	NA	NA	33200	0.01	NA	NA	NA	NA	12798860	7.62	97936	0.05
Insecta	Campoletis_sonorensis	7416	Arthropoda	Insecta	Hymenoptera	Ichneumonidae	GCA_013761285.1	4.4	3.15725e+08	NA	NA	NA	NA	NA	NA	812	0.174709	4.36175	0.0400548	844	0.169872	4.47744	0.0379395	0.703585	3.04427	0.0368384	0.699567	2.27412	0.0241529	45303632	14.44	301036	0.09	177808	0.05	1525328	0.48	13500	NA	272404	0.08	10212	NA	708	NA	42535776	13.56	466860	0.14
Insecta	Apis_cerana_cerana	94128	Arthropoda	Insecta	Hymenoptera	Apidae	GCA_011100585.1	0.2	2.6684e+08	NA	NA	NA	NA	NA	NA	823	0.00922807	0.112479	0.0820422	NA	NA	NA	NA	0.166704	0.232288	0.160572	0.193025	0.187876	0.0489947	NA	NA	NA	NA	NA	NA	NA	NA	NA	NA	NA	NA	NA	NA	NA	NA	NA	NA	NA	NA
Insecta	Apis_mellifera	7460	Arthropoda	Insecta	Hymenoptera	Apidae	GCA_003254395.2	0.4	234720000	8	AnAge	0.084	AnimalTraits	2.07944	-2.47694	279	0.00164186	0.0162352	0.10113	NA	NA	NA	NA	0.0138714	0.212766	0.175996	0.0208027	0.142021	0.0609102	11827824	5.07	1051860	0.45	504	NA	33272	0.01	25520	0.01	15848	NA	4532	NA	NA	NA	10225836	4.38	470452	0.2
Insecta	Apis_mellifera_mellifera	44477	Arthropoda	Insecta	Hymenoptera	Apidae	GCA_003314205.1	0.2	2.80598e+08	NA	NA	NA	NA	NA	NA	271	0.00193358	0.0179713	0.107593	NA	NA	NA	NA	0.0138714	0.206409	0.199512	0.0208027	0.143268	0.0457333	NA	NA	NA	NA	NA	NA	NA	NA	NA	NA	NA	NA	NA	NA	NA	NA	NA	NA	NA	NA
Insecta	Bombus_bifarius	103933	Arthropoda	Insecta	Hymenoptera	Apidae	GCA_011952205.1	0.5	3.28726e+08	NA	NA	NA	NA	NA	NA	279	0.00128683	0.0134256	0.0958494	NA	NA	NA	NA	0.00577383	0.427194	0.19293	0.00746008	0.305245	0.0498437	71719884	21.97	842784	0.25	7188	NA	4574420	1.4	5884	NA	2471088	0.75	2172	NA	NA	NA	63001804	19.3	814544	0.24
Insecta	Bombus_vancouverensis_nearcticus	2705178	Arthropoda	Insecta	Hymenoptera	Apidae	GCA_011952275.1	0.9	3.47303e+08	NA	NA	NA	NA	NA	NA	312	0.00155163	0.0135576	0.114447	NA	NA	NA	NA	0.00577383	0.426059	0.206862	0.00746008	0.306593	0.0433107	84691376	24.55	4661964	1.35	4744	NA	3869076	1.12	33468	NA	2246708	0.65	2740	NA	172	NA	72508432	21.02	1364072	0.39
Insecta	Bombus_impatiens	132113	Arthropoda	Insecta	Hymenoptera	Apidae	GCA_000188095.4	0.2	508560000	NA	NA	0.2795	AnimalTraits	NA	-1.27475	747	0.00384927	0.0326081	0.118046	NA	NA	NA	NA	0.0187512	0.506851	0.227998	0.0279987	0.353397	0.0596647	196510376	39.01	7119496	1.41	NA	NA	11585188	2.3	1168	NA	2952076	0.58	NA	NA	NA	NA	170057244	33.76	4795204	0.95
Insecta	Bombus_picipes	309970	Arthropoda	Insecta	Hymenoptera	Apidae	GCA_014737485.1	0.5	3.13238e+08	NA	NA	NA	NA	NA	NA	821	0.00690869	0.0691584	0.0998966	NA	NA	NA	NA	0.0514388	0.412954	0.200845	0.072046	0.303693	0.0637412	118206392	37.89	2537144	0.81	1708	NA	2325416	0.74	4800	NA	1976980	0.63	312	NA	1708	NA	107769092	34.55	3589232	1.15
Insecta	Bombus_ignitus	130704	Arthropoda	Insecta	Hymenoptera	Apidae	GCA_014825875.1	0.3	2.99412e+08	NA	NA	NA	NA	NA	NA	721	0.00416238	0.0325968	0.127693	NA	NA	NA	NA	0.0156985	0.563374	0.270364	0.0230461	0.338123	0.0786122	73099696	24.51	1252524	0.42	2588	NA	2210248	0.74	4184	NA	2525412	0.84	908	NA	NA	NA	66670420	22.36	433412	0.14
Insecta	Bombus_terrestris	30195	Arthropoda	Insecta	Hymenoptera	Apidae	GCA_000214255.1	0.2	625920000	NA	NA	NA	NA	NA	NA	716	0.00425007	0.0367835	0.115543	NA	NA	NA	NA	0.0156985	0.63471	0.145755	0.0230461	0.411569	0.0852035	NA	NA	NA	NA	NA	NA	NA	NA	NA	NA	NA	NA	NA	NA	NA	NA	NA	NA	NA	NA
Insecta	Bombus_polaris	130708	Arthropoda	Insecta	Hymenoptera	Apidae	GCA_014737335.1	0.9	3.03316e+08	NA	NA	NA	NA	NA	NA	812	0.00814686	0.0634295	0.12844	NA	NA	NA	NA	0.0574169	0.346146	0.292616	0.0789759	0.28288	0.0681051	99731824	33.02	1174800	0.38	4564	NA	6572988	2.17	2140	NA	2096048	0.69	10592	NA	NA	NA	89504948	29.63	365744	0.12
Insecta	Bombus_breviceps	395515	Arthropoda	Insecta	Hymenoptera	Apidae	GCA_014825925.1	0.5	3.06141e+08	NA	NA	NA	NA	NA	NA	851	0.00894633	0.0982231	0.0910817	NA	NA	NA	NA	0.0636432	0.457809	0.146786	0.0828946	0.402384	0.0631037	100042020	32.81	430992	0.14	3812	NA	1117176	0.36	2072	NA	1830924	0.6	5848	NA	NA	NA	96313600	31.59	337596	0.11
Insecta	Bombus_pyrosoma	396416	Arthropoda	Insecta	Hymenoptera	Apidae	GCA_014825855.1	0.2	3.14226e+08	NA	NA	NA	NA	NA	NA	849	0.00827717	0.08591	0.096347	NA	NA	NA	NA	0.0636432	0.418315	0.171426	0.0828946	0.391852	0.072198	91145132	29.13	888672	0.28	2352	NA	2236540	0.71	2484	NA	2913720	0.93	7232	NA	1844	NA	83848880	26.79	1243408	0.39
Insecta	Bombus_cullumanus	2562068	Arthropoda	Insecta	Hymenoptera	Apidae	GCA_014737535.1	0.9	3.04764e+08	NA	NA	NA	NA	NA	NA	847	0.0102603	0.0786162	0.130512	NA	NA	NA	NA	0.0651018	0.388428	0.169726	0.0831794	0.284122	0.120743	105209584	34.66	684740	0.22	11652	NA	3498336	1.15	1640	NA	1934880	0.63	10060	NA	NA	NA	98803996	32.55	264280	0.08
Insecta	Bombus_sibiricus	421273	Arthropoda	Insecta	Hymenoptera	Apidae	GCA_014737505.1	0.7	3.23443e+08	NA	NA	NA	NA	NA	NA	821	0.0057318	0.0563488	0.10172	NA	NA	NA	NA	0.0651018	0.276778	0.141037	0.0831794	0.256569	0.101671	117541000	36.49	920252	0.28	9908	NA	2692040	0.83	2104	NA	1660684	0.51	6560	NA	NA	NA	111767512	34.7	481940	0.14
Insecta	Bombus_consobrinus	130686	Arthropoda	Insecta	Hymenoptera	Apidae	GCA_014737455.1	0.4	3.07284e+08	NA	NA	NA	NA	NA	NA	854	0.0108559	0.111561	0.0973095	886	0.0108616	0.115795	0.0938001	0.0766151	0.492687	0.167385	0.0996393	0.348799	0.0717548	98802348	32.29	408184	0.13	3948	NA	8823512	2.88	1084	NA	2455192	0.8	6532	NA	552	NA	86114856	28.14	988488	0.32
Insecta	Bombus_difficillimus	395520	Arthropoda	Insecta	Hymenoptera	Apidae	GCA_014737525.1	0.1	3.00617e+08	NA	NA	NA	NA	NA	NA	849	0.0105987	0.101629	0.104288	NA	NA	NA	NA	0.0766151	0.443531	0.176774	0.0996393	0.339221	0.0791646	118304328	39.52	614240	0.2	244	NA	1475584	0.49	NA	NA	2471824	0.82	2348	NA	NA	NA	113455600	37.9	284488	0.09
Insecta	Bombus_haemorrhoidalis	207636	Arthropoda	Insecta	Hymenoptera	Apidae	GCA_014825975.1	0.5	2.9696e+08	NA	NA	NA	NA	NA	NA	856	0.0131858	0.14677	0.08984	886	0.0125212	0.145968	0.0857804	0.0748905	0.69082	0.131719	0.102474	0.434796	0.0686365	128271984	43.38	2801484	0.94	3388	NA	137120	0.04	516	NA	434244	0.14	156	NA	612	NA	123986900	41.93	907564	0.3
Insecta	Bombus_opulentus	2024865	Arthropoda	Insecta	Hymenoptera	Apidae	GCA_014737405.1	0.4	2.99157e+08	NA	NA	NA	NA	NA	NA	857	0.0141222	0.11067	0.127607	890	0.0147434	0.126375	0.116664	0.0665844	0.499716	0.202168	0.0910738	0.442238	0.0880051	97854072	32.85	1835756	0.61	1588	NA	3785912	1.27	51248	0.01	2925060	0.98	5348	NA	NA	NA	88577596	29.73	671564	0.22
Insecta	Bombus_skorikovi	395565	Arthropoda	Insecta	Hymenoptera	Apidae	GCA_014737355.1	0.5	2.98775e+08	NA	NA	NA	NA	NA	NA	817	0.00638584	0.0511078	0.124948	NA	NA	NA	NA	0.0307955	0.492789	0.249683	0.0408407	0.413974	0.0682045	81608776	27.43	696096	0.23	132168	0.04	783480	0.26	2432	NA	2500632	0.84	1080	NA	NA	NA	76633924	25.76	858964	0.28
Insecta	Bombus_turneri	686820	Arthropoda	Insecta	Hymenoptera	Apidae	GCA_014825825.1	0.4	3.00074e+08	NA	NA	NA	NA	NA	NA	801	0.00590431	0.0455067	0.129746	NA	NA	NA	NA	0.0307955	0.500544	0.253422	0.0408407	0.34999	0.0713607	61286788	20.51	1254556	0.41	9468	NA	1442432	0.48	10516	NA	2468904	0.82	8744	NA	660	NA	54950348	18.39	1141160	0.38
Insecta	Bombus_soroeensis	184059	Arthropoda	Insecta	Hymenoptera	Apidae	GCA_014737365.1	0.5	3.00633e+08	NA	NA	NA	NA	NA	NA	837	0.0134094	0.119624	0.112096	862	0.0132909	0.129529	0.10261	0.0993823	0.400901	0.184093	0.129179	0.326335	0.0966413	98640440	32.95	1516728	0.5	2428	NA	1081824	0.36	2568	NA	786280	0.26	12588	NA	NA	NA	94849180	31.68	388844	0.12
Insecta	Bombus_confusus	217217	Arthropoda	Insecta	Hymenoptera	Apidae	GCA_014737475.1	0.4	2.9522e+08	NA	NA	NA	NA	NA	NA	859	0.017462	0.169103	0.103262	883	0.0160204	0.158061	0.101355	0.142399	0.358523	0.152755	0.183265	0.321809	0.0764839	195357456	66.45	28119704	9.56	NA	NA	1182848	0.4	1000	NA	1231036	0.41	188	NA	NA	NA	164041140	55.8	781540	0.26
Insecta	Bombus_superbus	1869276	Arthropoda	Insecta	Hymenoptera	Apidae	GCA_014737385.1	0.4	2.84374e+08	NA	NA	NA	NA	NA	NA	754	0.00421932	0.038913	0.10843	NA	NA	NA	NA	0.0571767	0.211761	0.280857	0.0695983	0.185034	0.0356335	64319408	22.71	488152	0.17	7632	NA	1947012	0.68	9020	NA	647788	0.22	6276	NA	NA	NA	51992816	18.36	9220712	3.25
Insecta	Bombus_waltoni	395577	Arthropoda	Insecta	Hymenoptera	Apidae	GCA_014737395.1	0.1	2.85596e+08	NA	NA	NA	NA	NA	NA	799	0.00614247	0.0439851	0.139649	NA	NA	NA	NA	0.0571767	0.22606	0.206252	0.0695983	0.19215	0.0573692	49299980	17.33	593460	0.2	6108	NA	2018768	0.7	5232	NA	474512	0.16	11724	NA	704	NA	45284284	15.92	905188	0.31
Insecta	Frieseomelitta_varia	561572	Arthropoda	Insecta	Hymenoptera	Apidae	GCA_011392965.1	0.7	459660000	NA	NA	NA	NA	NA	NA	851	0.0514731	0.791617	0.0650228	879	0.0485055	0.774019	0.062667	0.299699	0.778516	0.119775	0.344631	0.748944	0.0455083	124356624	27.33	704596	0.15	1340	NA	434928	0.09	2256	NA	925844	0.2	3416	NA	180	NA	121347412	26.67	936652	0.2
Insecta	Megachile_rotundata	143995	Arthropoda	Insecta	Hymenoptera	Megachilidae	GCA_000220905.1	0.2	811740000	NA	NA	NA	NA	NA	NA	855	0.0503093	0.847393	0.0593695	887	0.0763944	1.42024	0.05379	0.352557	0.843001	0.109999	0.365203	0.720797	0.0442517	420797596	52.33	4032992	0.5	11408	NA	3245000	0.4	123220	0.01	142352	0.01	NA	NA	NA	NA	404526904	50.3	8715720	1.08
Insecta	Osmia_bicornis_bicornis	1437191	Arthropoda	Insecta	Hymenoptera	Megachilidae	GCA_004153925.1	4.7	2.60713e+08	NA	NA	NA	NA	NA	NA	764	0.00688857	0.0882351	0.0780707	NA	NA	NA	NA	0.0535796	0.474791	0.139592	0.0483753	0.503816	0.0766655	128324744	49.47	906096	0.34	327532	0.12	3596884	1.38	1032	NA	912924	0.35	NA	NA	1920	NA	120410060	46.42	2168296	0.83
Insecta	Osmia_lignaria	473952	Arthropoda	Insecta	Hymenoptera	Megachilidae	GCA_012274295.1	0.6	2.20144e+08	NA	NA	NA	NA	NA	NA	796	0.00944795	0.111367	0.0848363	NA	NA	NA	NA	0.0535796	0.455173	0.177934	0.0483753	0.485919	0.0713856	NA	NA	NA	NA	NA	NA	NA	NA	NA	NA	NA	NA	NA	NA	NA	NA	NA	NA	NA	NA
Insecta	Cyphomyrmex_costatus	456900	Arthropoda	Insecta	Hymenoptera	Formicidae	GCA_001594065.1	1.4	3.69311e+08	NA	NA	NA	NA	NA	NA	799	0.0379552	0.49457	0.0767438	825	0.0374266	0.512946	0.072964	0.11839	0.799895	0.189357	0.132864	0.957012	0.0750173	80407684	22.01	2230384	0.61	59236	0.01	3574788	0.97	32100	NA	623988	0.17	47124	0.01	268	NA	72769528	19.92	1070268	0.29
Insecta	Trachymyrmex_zeteki	64791	Arthropoda	Insecta	Hymenoptera	Formicidae	GCA_001594055.1	0.5	3.30164e+08	NA	NA	0.0021265	AnimalTraits	NA	-6.15328	790	0.0349125	0.545814	0.063964	819	0.0343675	0.565772	0.0607444	0.11839	1.4186	0.10333	0.132864	1.17593	0.0399282	56054012	17.15	3555920	1.08	51648	0.01	1338288	0.4	10712	NA	162024	0.04	1220	NA	NA	NA	50241312	15.37	692888	0.21
Insecta	Vespa_mandarinia	7446	Arthropoda	Insecta	Hymenoptera	Vespidae	GCA_014083535.1	0.7	3.0564e+08	NA	NA	NA	NA	NA	NA	822	0.0240096	0.340768	0.0704573	881	0.142391	2.85705	0.0498384	0.245985	0.466246	0.106954	0.22489	0.432305	0.0645285	NA	NA	NA	NA	NA	NA	NA	NA	NA	NA	NA	NA	NA	NA	NA	NA	NA	NA	NA	NA
Insecta	Vespula_germanica	30212	Arthropoda	Insecta	Hymenoptera	Vespidae	GCA_014466195.1	0.5	224940000	NA	NA	NA	NA	NA	NA	780	0.00520617	0.0716211	0.0726905	NA	NA	NA	NA	0.0609394	0.372729	0.114901	0.0328854	0.582693	0.0580494	34708924	15.53	216776	0.09	13816	NA	47368	0.02	15488	NA	62264	0.02	40508	0.01	3168	NA	33723044	15.09	586492	0.26
Insecta	Vespula_pensylvanica	30213	Arthropoda	Insecta	Hymenoptera	Vespidae	GCA_014466175.1	0.5	2.22926e+08	NA	NA	NA	NA	NA	NA	784	0.00464412	0.0650527	0.0713901	NA	NA	NA	NA	0.0609394	0.364733	0.12622	0.0328854	0.614095	0.0695384	30854268	13.93	160188	0.07	6020	NA	39592	0.01	12116	NA	110188	0.04	41580	0.01	792	NA	29797080	13.45	686712	0.31
Insecta	Orussus_abietinus	222816	Arthropoda	Insecta	Hymenoptera	Orussidae	GCA_000612105.2	0.3	2.31432e+08	NA	NA	NA	NA	NA	NA	839	0.188147	4.24628	0.0443085	874	0.183528	4.35336	0.0421577	0.721311	2.25214	0.0577091	0.735229	2.23529	0.0294044	79467460	34.71	379896	0.16	19680	NA	479568	0.2	2548	NA	182772	0.07	1380	NA	1120	NA	78148848	34.13	251648	0.1
Insecta	Neodiprion_lecontei	441921	Arthropoda	Insecta	Hymenoptera	Diprionidae	GCA_001263575.2	0.6	2.96038e+08	NA	NA	NA	NA	NA	NA	847	0.169885	3.93679	0.0431532	881	0.165444	4.06973	0.0406522	0.812223	2.43235	0.0423536	0.816361	1.83427	0.0273158	37376212	12.76	533508	0.18	54136	0.01	1999252	0.68	868	NA	84236	0.02	2888	NA	NA	NA	34329960	11.72	371364	0.12
Insecta	Aphis_glycines	307491	Arthropoda	Insecta	Hemiptera	Aphididae	GCA_009928515.1	5	3.72747e+08	NA	NA	NA	NA	NA	NA	744	0.0208126	0.402783	0.0516721	773	0.0205468	0.411072	0.0499836	0.0488429	2.79905	0.0782796	0.0833544	1.51348	0.0418455	NA	NA	NA	NA	NA	NA	NA	NA	NA	NA	NA	NA	NA	NA	NA	NA	NA	NA	NA	NA
Insecta	Melanaphis_sacchari	742174	Arthropoda	Insecta	Hemiptera	Aphididae	GCA_002803265.2	2.8	3.69256e+08	NA	NA	NA	NA	NA	NA	779	0.0231387	0.41789	0.0553701	802	0.0227664	0.424843	0.0535878	0.0488429	2.93904	0.0866305	0.0833544	1.48177	0.0488352	29521760	8.05	723916	0.19	67744	0.01	319684	0.08	2412	NA	225524	0.06	NA	NA	NA	NA	27571188	7.51	611292	0.16
Insecta	Myzus_persicae	13164	Arthropoda	Insecta	Hemiptera	Aphididae	GCA_001856785.1	4.1	312960000	NA	NA	NA	NA	NA	NA	778	0.0179126	0.374491	0.0478319	805	0.017581	0.380782	0.0461708	0.0425743	2.91012	0.0794424	0.0720973	1.62212	0.0384617	54656864	17.65	616164	0.19	321808	0.1	1338004	0.43	6824	NA	438624	0.14	NA	NA	NA	NA	51375312	16.59	560128	0.18
Insecta	Sitobion_miscanthi	44668	Arthropoda	Insecta	Hemiptera	Aphididae	GCA_008086715.1	6.4	4.87361e+08	NA	NA	NA	NA	NA	NA	727	0.0185568	0.324063	0.0572629	749	0.0182592	0.330234	0.0552918	0.0425743	2.55902	0.0828988	0.0720973	1.46614	0.0469778	129241692	26.7	2847408	0.58	807280	0.16	2543176	0.52	5732	NA	1436232	0.29	4320	NA	NA	NA	118489696	24.48	3107848	0.64
Insecta	Pentalonia_nigronervosa	693967	Arthropoda	Insecta	Hemiptera	Aphididae	GCA_014851325.1	3	4.59972e+08	NA	NA	NA	NA	NA	NA	782	0.0251057	0.392192	0.0640138	812	0.0248342	0.400205	0.0620536	0.0563268	2.36338	0.0910853	0.0958426	1.24636	0.0581239	141426032	30.88	6312168	1.37	862832	0.18	970444	0.21	10084	NA	1885228	0.41	4504	NA	4072	NA	128924088	28.15	2452612	0.53
Insecta	Eriosoma_lanigerum	133082	Arthropoda	Insecta	Hemiptera	Pemphigidae	GCA_013282895.1	2.1	4.1113e+08	NA	NA	NA	NA	NA	NA	789	0.0684086	1.16105	0.0589198	816	0.0669218	1.1919	0.0561471	0.16132	2.10839	0.0947001	0.244257	1.33475	0.0620363	84354048	20.66	985064	0.24	47080	0.01	1328872	0.32	24336	NA	886668	0.21	NA	NA	136	NA	78970072	19.34	2111820	0.51
Insecta	Cinara_cedri	506608	Arthropoda	Insecta	Hemiptera	Lachnidae	GCA_902439185.1	2.4	4.85171e+08	NA	NA	NA	NA	NA	NA	752	0.0599446	0.965184	0.0621069	783	0.0587642	0.996076	0.0589957	0.210473	1.42973	0.0840741	0.28339	1.02215	0.0676665	138497228	28.86	572320	0.11	207888	0.04	38240	NA	NA	NA	215688	0.04	NA	NA	NA	NA	136712068	28.48	751024	0.15
Insecta	Phenacoccus_solenopsis	483260	Arthropoda	Insecta	Hemiptera	Pseudococcidae	GCA_009761765.1	7	3.59896e+08	NA	NA	NA	NA	NA	NA	660	0.327172	5.67583	0.0576431	683	0.31979	5.61116	0.0569919	0.797369	4.44678	0.0397631	0.715818	2.09374	0.0657285	91886340	25.71	633324	0.17	50832	0.01	757312	0.21	NA	NA	573536	0.16	NA	NA	736	NA	88765940	24.83	1104660	0.3
Insecta	Bemisia_tabaci	7038	Arthropoda	Insecta	Hemiptera	Aleyrodidae	GCA_001854935.1	1.8	665040000	NA	NA	NA	NA	NA	NA	745	0.129489	3.00188	0.0431358	775	0.126957	3.10578	0.0408776	0.466877	2.55449	0.0490992	0.381559	2.19492	0.0283868	227941352	34.52	1795676	0.27	625172	0.09	2717552	0.41	2252	NA	4101124	0.62	170520	0.02	NA	NA	217495292	32.94	1033764	0.15
Insecta	Trialeurodes_vaporariorum	88556	Arthropoda	Insecta	Hemiptera	Aleyrodidae	GCA_011764245.1	1.3	9.58943e+08	NA	NA	NA	NA	NA	NA	729	0.118252	2.912	0.0406083	753	0.11581	3.02759	0.0382516	0.466877	1.95456	0.0582441	0.381559	2.07022	0.0312625	428198764	44.96	3241456	0.34	87224	NA	4413392	0.46	4780	NA	1510796	0.15	323716	0.03	NA	NA	415339736	43.61	3277664	0.34
Insecta	Apolygus_lucorum	248454	Arthropoda	Insecta	Hemiptera	Miridae	GCA_009739505.2	5.7	880200000	NA	NA	NA	NA	NA	NA	724	0.255701	5.47444	0.0467081	750	0.250472	5.49714	0.045564	0.544678	5.63415	0.0334637	0.401708	7.21041	0.0244976	497903416	56.99	7750860	0.88	152392	0.01	20739616	2.37	7248	NA	9137968	1.04	82844	NA	84588	NA	456564772	52.26	3383128	0.38
Insecta	Cimex_lectularius	79782	Arthropoda	Insecta	Hemiptera	Cimicidae	GCA_000648675.3	1.8	6.24105e+08	NA	NA	NA	NA	NA	NA	775	0.177738	4.09053	0.043451	802	0.174591	4.2505	0.0410754	0.544678	4.72418	0.0362281	0.401708	4.95619	0.0335968	285919392	46.31	10791192	1.74	73216	0.01	1640340	0.26	32468	NA	7049288	1.14	862668	0.13	NA	NA	261445244	42.34	4024976	0.65
Insecta	Orius_insidiosus	83647	Arthropoda	Insecta	Hemiptera	Anthocoridae	GCA_014119065.1	36.9	4.04016e+08	NA	NA	NA	NA	NA	NA	420	0.159512	4.04474	0.0394369	428	0.156412	4.19473	0.0372877	NA	NA	NA	NA	NA	NA	NA	NA	NA	NA	NA	NA	NA	NA	NA	NA	NA	NA	NA	NA	NA	NA	NA	NA	NA	NA
Insecta	Triatoma_infestans	30076	Arthropoda	Insecta	Hemiptera	Reduviidae	GCA_011037195.1	1.8	1603920000	NA	NA	NA	NA	NA	NA	713	0.201812	4.87985	0.0413562	741	0.196993	5.0174	0.039262	0.615014	4.62172	0.0339964	0.470165	2.59687	0.046804	783525760	49.19	30889820	1.93	48765828	3.06	17453608	1.09	79516	NA	55094644	3.45	7146796	0.44	6636	NA	616744364	38.72	7344548	0.46
Insecta	Euschistus_heros	437493	Arthropoda	Insecta	Hemiptera	Pentatomidae	GCA_003667255.1	3.6	1.6097e+09	NA	NA	NA	NA	NA	NA	639	0.242176	5.30065	0.045688	660	0.236418	5.37561	0.0439797	0.699872	3.8063	0.0404849	0.522821	2.67062	0.0556465	NA	NA	NA	NA	NA	NA	NA	NA	NA	NA	NA	NA	NA	NA	NA	NA	NA	NA	NA	NA
Insecta	Laodelphax_striatellus	195883	Arthropoda	Insecta	Hemiptera	Delphacidae	GCA_003335185.2	3.8	508560000	NA	NA	NA	NA	NA	NA	738	0.307287	5.73203	0.0536088	771	0.299228	5.66533	0.0528175	0.878235	2.4614	0.0625249	0.826661	2.90489	0.036934	99942752	19.82	2984124	0.59	70336	0.01	1708156	0.33	55536	0.01	4644372	0.92	1034800	0.2	1004	NA	88249812	17.5	1194612	0.23
Insecta	Thrips_palmi	161013	Arthropoda	Insecta	Thysanoptera	Thripidae	GCA_012932325.1	0.4	2.93682e+08	NA	NA	NA	NA	NA	NA	772	0.358109	5.61002	0.0638338	812	0.348795	5.49826	0.0634374	0.929619	3.87366	0.0426893	0.911664	2.82134	0.0409302	NA	NA	NA	NA	NA	NA	NA	NA	NA	NA	NA	NA	NA	NA	NA	NA	NA	NA	NA	NA
Insecta	Blattella_germanica	6973	Arthropoda	Insecta	Blattodea	Ectobiidae	GCA_000762945.2	3.1	1956000000	NA	NA	NA	NA	NA	NA	791	0.110187	2.60615	0.0422797	823	0.107062	2.7177	0.0393943	0.480564	1.79862	0.0593235	0.481344	1.24073	0.0490851	955593248	49.39	60656148	3.13	260596	0.01	7378896	0.38	186428	NA	60546628	3.12	3739804	0.19	NA	NA	806842904	41.7	15981844	0.82
Insecta	Cryptotermes_secundus	105785	Arthropoda	Insecta	Blattodea	Kalotermitidae	GCA_002891405.2	1.7	1.23907e+09	NA	NA	NA	NA	NA	NA	825	0.10058	1.99911	0.0503125	857	0.0979275	2.07027	0.0473018	0.276849	1.50788	0.110076	0.250215	1.95962	0.0579953	578260376	47.03	28677976	2.33	94156	NA	6886420	0.56	24368	NA	35591696	2.89	8700096	0.7	14052	NA	485424960	39.48	12846652	1.04
Insecta	Periplaneta_americana	6978	Arthropoda	Insecta	Blattodea	Blattidae	GCA_002939525.1	6.5	3334980000	NA	NA	0.574	AnimalTraits	NA	-0.555126	761	0.0841212	1.86576	0.0450869	794	0.0814324	1.92451	0.0423133	0.276849	2.47442	0.0610963	0.250215	2.3413	0.0344824	2054060780	62.02	114590928	3.46	6913268	0.2	10237728	0.3	288548	NA	122065932	3.68	17029508	0.51	116572	NA	1752452612	52.91	30362912	0.91
Insecta	Ephemera_danica	1049336	Arthropoda	Insecta	Ephemeroptera	Ephemeridae	GCA_000507165.2	3.1	5.79945e+08	NA	NA	NA	NA	NA	NA	720	0.341743	5.41641	0.0630941	752	0.32169	5.29905	0.0607072	0.963927	3.46232	0.0384517	0.959835	3.27542	0.0298712	164398276	28.65	314064	0.05	1116	NA	745636	0.12	NA	NA	2191440	0.38	31428	NA	NA	NA	160459084	27.97	655508	0.11
Insecta	Ladona_fulva	123851	Arthropoda	Insecta	Odonata	Libellulidae	GCA_000376725.2	0.7	1.40692e+09	NA	NA	NA	NA	NA	NA	740	0.228011	4.73523	0.0481521	771	0.21111	4.72066	0.0447205	0.963927	3.6069	0.0301886	0.959835	1.75731	0.0431965	559436064	40.19	7549040	0.54	71000	NA	3638552	0.26	36384	NA	18844112	1.35	2814708	0.2	NA	NA	523687576	37.62	2794692	0.2
Insecta	Rhinocypha_anisoptera	2487776	Arthropoda	Insecta	Odonata	Chlorocyphidae	GCA_011762765.1	25.4	2.27132e+09	NA	NA	NA	NA	NA	NA	471	0.392884	2.93829	0.133712	488	0.374808	2.97688	0.125906	NA	NA	NA	NA	NA	NA	772047556	34.22	23132600	1.02	330352	0.01	5763788	0.25	329568	0.01	29127884	1.29	3578000	0.15	5064	NA	698640800	30.97	11139500	0.49
[truncated: 20 more columns]
